# Supplementary material
Source: PubMed Central journal article supplement (PMC3670427)
Supplement: ja402016p_si_013.pdf [file ja402016p_si_013.pdf]

*Supporting information for:*

## **QM/MM Modeling of Regioselectivity of Drug Metabolism in Cytochrome P450 2C9**

Richard Lonsdale, Kerensa T. Houghton, Jolanta Żurek, Christine  
M. Bathelt, Nicolas Foloppe, Marcel de Groot, Jeremy N. Harvey,\*  
and Adrian J. Mulholland\*

*Centre for Computational Chemistry, School of Chemistry,  
University of Bristol, Cantock's Close, Bristol, BS8 1TS, UK*

E-mail: [jeremy.harvey@bristol.ac.uk](mailto:jeremy.harvey@bristol.ac.uk);

[adrian.mulholland@bristol.ac.uk](mailto:adrian.mulholland@bristol.ac.uk)

Phone: +44 (0)117 928 9097. Fax: +44 (0)117 925 0612

## Contents

- A. Additional CHARMM topology and parameters for *S*-warfarin
- B. QM calculations
  - i. Absolute energies
  - ii. Mulliken charges and spin densities
  - iii. Cartesian coordinates
- C. QM/MM calculations
  - i. Absolute energies
  - ii. Mulliken charges and spin densities
  - iii. Cartesian coordinates of QM region
  - iv. Details of the supplementary PDB files

## A. Additional CHARMM topology and parameters for S-warfarin

```

GROUP
ATOM C3 CA -0.115 !
ATOM H1 HP 0.115 !
GROUP !
ATOM C4 CA -0.115 !
ATOM H2 HP 0.115 !
GROUP !
ATOM C5 CA -0.115 !
ATOM H3 HP 0.115 !
GROUP !
ATOM C6 CA -0.115 !
ATOM H4 HP 0.115 !
GROUP !
ATOM
C1CPT 0.35 !
ATOM O1 OS -0.315 !
ATOM C12 C 0.61 !
ATOM O3 O -0.51 !
ATOM C10 CA -0.115 !
ATOM C8 CA 0.11 !
ATOM O2 OH1 -0.54 !
ATOM H8 H 0.43 !
ATOM C2 CPT -0.02 !
GROUP !
ATOM C13 CA -0.115 !
ATOM H7 HA 0.09 !
GROUP !
ATOM C14 CT1 -0.09 !
ATOM H11 HA 0.09 !
GROUP !
ATOM C15 CA 0 !
GROUP !
ATOM C16 CT2 -0.18 !
ATOM H5 HA 0.09 !
ATOM H6 HA 0.09 !
GROUP !
ATOM C17 CA -0.115 !
ATOM H15 HP 0.115 !
GROUP !
ATOM C18 C 0.51 !
ATOM O4 O -0.51 !
GROUP !
ATOM C7 CT3 -0.27 !
ATOM H12 HA 0.09 !
ATOM H14 HA 0.09 !
ATOM H10 HA 0.09 !
GROUP !
ATOM C19 CA -0.115 !
ATOM H16 HP 0.115 !
GROUP !
ATOM C9 CA -0.115 !
ATOM H9 HP 0.115 !

```

The diagram illustrates the chemical structure of S-warfarin with atom numbering and connectivity. The structure consists of a coumarin ring system (atoms C1-C8, O1, O2) fused to a benzofuran ring system (atoms C9-C19, O3, O4). The atoms are numbered as follows: C1, C2, C3, C4, C5, C6, C7, C8, C9, C10, C11, C12, C13, C14, C15, C16, C17, C18, C19; O1, O2, O3, O4; H1, H2, H3, H4, H5, H6, H7, H8, H9, H10, H11, H12, H13, H14, H15, H16. The connectivity is shown with lines and symbols: /, \, //, and ||.

```

GROUP
ATOM C11 CA -0.115
ATOM H11 HP 0.115
GROUP
ATOM C13 CA -0.115
ATOM H13 HP 0.115

```

```

BONDS
!
!V(bond) = Kb(b - b0)**2
!
!Kb: kcal/mole/A**2
!b0: A
!
!atom type Kb          b0
CPT  OS      340.0      1.381
CA   C        450.0      1.389
CA   CT1      230.0      1.490
C    OS       340.0      1.381

```

```

ANGLES
!
!V(angle) = Ktheta(Theta - Theta0)**2
!
!Ktheta: kcal/mole/rad**2
!Theta0: degrees
!
!atom types      Ktheta      Theta0
CA   CPT  OS      55.0      118.4
OS   CPT  CPT      55.0      118.4
CPT  OS   C        40.0      122.6
OS   C    O        90.0      115.6
OS   C    CA       55.0      116.8
O    C    CA       80.0      127.3
C    CA   CA       40.0      122.2
C    CA   CT1      45.8      120.3
CA   CA   CT1      45.8      122.3
OH1  CA   CPT      55.0      118.5
CA   CPT  CA       40.0      120.0
CA   CT1  HA       29.0      120.0
CA   CT1  CA       52.0      108.0
CA   CT1  CT2      52.0      108.0
CT1  CT2  C        50.0      109.0
CT2  C    CT3      70.0      121.5

```

```

DIHEDRALS
!
!V(dihedral) = Kchi(1 + cos(n(chi) - delta))
!
!Kchi: kcal/mole
!n: multiplicity
!delta: degrees

```

```

!
!atom types          Kchi    n    delta
CA    CPT  CA    CA    3.1    1    0.0
CA    CPT  CA    OH1   3.1    1   180.0
HP    CA    CPT  CA    3.5    1   180.0
CA    CA    CPT  OS    3.1    1    0.0
CA    CPT  OS    C     3.1    1    0.0
HP    CA    CPT  OS    0.1    1   180.0
CPT   OS    C     O     3.1    1    0.0
CPT   OS    C     CA    3.1    1   180.0
CPT   CPT   CA    OH1   3.1    1    0.0
OS    C     CA    CA    3.1    1   180.0
OS    C     CA    CT1   3.1    1    0.0
C     OS    CPT  CPT   3.1    1   180.0
C     CA    CA    OH1   3.1    1    0.0
C     CA    CA    CPT   3.1    1   180.0
C     CA    CT1  HA    4.2    3    0.0
C     CA    CT1  CA    3.1    3    0.0
C     CA    CT1  CT2   3.1    3    0.0
O     C     CA    CA    3.1    1    0.0
O     C     CA    CT1   3.1    1   180.0
CA    CT1  CA    CA    4.2    1    0.0
CA    CA    CT1  HA    0.3    3    0.0
CA    CA    CT1  CT2   4.2    3    0.0
OH1   CA    CA    CT1   4.2    1   180.0
H     OH1  CA    CPT   0.1    1    0.0
CPT   CA    CA    CT1   4.2    1    0.0
CT1   CA    CA    HP    4.2    1   180.0
CT1   CA    CA    CA    4.2    1    0.0
CT1   CT2  C     O     0.3    1    0.0
CT1   CT2  C     CT3   0.3    1    0.0
CT2   C     CT3  HA    0.3    3    0.0
HA    CT2  C     CT3   0.3    3    0.0

```

## B. QM Calculations

i) Absolute energies [in atomic units] of reactant complexes and transition states, calculated at the B3LYP-D level. Energies calculated at with the LANL2DZ/6-31G basis set combination are shown in bold, with energies calculated at the SDD/VTZ(d,p) level shown in regular typeface.

Table S1 Energies of individual reactants

|            |            | Quartet             | Doublet             | Singlet             |
|------------|------------|---------------------|---------------------|---------------------|
| Compound I | <b>BSI</b> | <b>-1584.878528</b> | <b>-1584.878393</b> | -                   |
|            | BSII       | -1585.647078        | -1585.647272        | -                   |
| Diclofenac | <b>BSI</b> | -                   | -                   | <b>-1664.957067</b> |
|            | BSII       | -                   | -                   | -1665.511463        |
| Ibuprofen  | <b>BSI</b> | -                   | -                   | <b>-656.1592195</b> |
|            | BSII       | -                   | -                   | -656.5687707        |
| Warfarin   | <b>BSI</b> | -                   | -                   | <b>-571.7788991</b> |
|            | BSII       | -                   | -                   | -572.1481413        |

Table S2 Energies of reactant complexes (RC) and transition states (TS) for hydrogen abstraction from C2 and C3 of ibuprofen

|    |    |            | Quartet             | Doublet             |
|----|----|------------|---------------------|---------------------|
| C2 | RC | <b>BSI</b> | <b>-2241.06786</b>  | <b>-2241.067706</b> |
|    |    | BSII       | -2242.239048        | -2242.239329        |
|    | TS | <b>BSI</b> | <b>-2241.042855</b> | <b>-2241.039498</b> |
|    |    | BSII       | -2242.215529        | -2242.213424        |
| C3 | RC | <b>BSI</b> | <b>-2241.067121</b> | <b>-2241.066908</b> |
|    |    | BSII       | -2242.237856        | -2242.237995        |
|    | TS | <b>BSI</b> | <b>-2241.02662</b>  | <b>-2241.029079</b> |
|    |    | BSII       | -2242.197836        | -2242.202071        |

Table S3 Energies of reactant complexes (RC) and transition states (TS) for C-O bond formation to C6 and C7 of warfarin

|    |    |            | Quartet             | Doublet             |
|----|----|------------|---------------------|---------------------|
| C6 | RC | <b>BSI</b> | <b>-2156.683588</b> | <b>-2156.683085</b> |
|    |    | BSII       | -2157.816           | -2157.815932        |
|    | TS | <b>BSI</b> | <b>-2156.660675</b> | <b>-2156.664002</b> |
|    |    | BSII       | -2157.792537        | -2157.795576        |
| C7 | RC | <b>BSI</b> | <b>-2156.683588</b> | <b>-2156.683085</b> |
|    |    | BSII       | -2157.816           | -2157.815932        |
|    | TS | <b>BSI</b> | <b>-2156.658322</b> | <b>-2156.663595</b> |
|    |    | BSII       | -2157.79048         | -2157.794707        |

Table S4 Energies of reactant complexes (RC) and transition states (TS) for C-O bond formation to C4' and C5 of diclofenac

|     |    |            | Quartet             | Doublet             |
|-----|----|------------|---------------------|---------------------|
| C5  | RC | <b>BSI</b> | <b>-3249.859295</b> | <b>-3249.859187</b> |
|     |    | BSII       | -3251.175314        | -3251.175465        |
|     | TS | <b>BSI</b> | <b>-3249.834017</b> | <b>-3249.838194</b> |
|     |    | BSII       | -3251.15068         | -3251.15407         |
| C4' | RC | <b>BSI</b> | <b>-3249.85964</b>  | <b>-3249.859568</b> |
|     |    | BSII       | -3251.177803        | -3251.178005        |
|     | TS | <b>BSI</b> | <b>-3249.838463</b> | <b>-3249.839691</b> |
|     |    | BSII       | -3251.156516        | -3251.157498        |

ii) Mulliken charges and spin densities (calculated with BSII)

Table S5 Ibuprofen

|            |        | TS      |         |         |         |         |         |
|------------|--------|---------|---------|---------|---------|---------|---------|
|            |        | RC      |         | C2      |         | C3      |         |
|            |        | Doublet | Quartet | Doublet | Quartet | Doublet | Quartet |
| <b>Fe</b>  | Charge | 0.36    | 0.35    | 0.32    | 0.26    | 0.31    | 0.26    |
|            | Spin   | 1.35    | 1.21    | 1.13    | 1.57    | 2.13    | 1.55    |
| <b>O</b>   | Charge | -0.31   | -0.31   | -0.38   | -0.37   | -0.36   | -0.32   |
|            | Spin   | 0.78    | 0.85    | 0.48    | 0.62    | 0.16    | 0.62    |
| <b>SH</b>  | Charge | -0.08   | -0.09   | -0.14   | -0.09   | -0.10   | -0.11   |
|            | Spin   | -0.61   | 0.54    | -0.42   | 0.30    | -0.52   | 0.36    |
| <b>Por</b> | Charge | 0.02    | 0.03    | -0.04   | -0.07   | 0.02    | 0.06    |
|            | Spin   | -0.52   | 0.38    | -0.55   | -0.01   | -0.40   | 0.14    |
| <b>Sub</b> | Charge | 0.01    | 0.01    | 0.24    | 0.26    | 0.12    | 0.12    |
|            | Spin   | 0.01    | 0.01    | 0.36    | 0.51    | -0.37   | 0.33    |

Table S6 Warfarin

|            |        | TS      |         |         |         |         |         |
|------------|--------|---------|---------|---------|---------|---------|---------|
|            |        | RC      |         | C6      |         | C7      |         |
|            |        | Doublet | Quartet | Doublet | Quartet | Doublet | Quartet |
| <b>Fe</b>  | Charge | 0.39    | 0.38    | 0.31    | 0.31    | 0.31    | 0.30    |
|            | Spin   | 1.30    | 1.18    | 1.84    | 1.58    | 1.87    | 1.49    |
| <b>O</b>   | Charge | -0.31   | -0.31   | -0.35   | -0.34   | -0.35   | -0.33   |
|            | Spin   | 0.81    | 0.89    | 0.04    | 0.63    | 0.09    | 0.62    |
| <b>SH</b>  | Charge | -0.07   | -0.08   | -0.16   | -0.11   | -0.15   | -0.10   |
|            | Spin   | -0.63   | 0.56    | -0.19   | 0.28    | -0.25   | 0.33    |
| <b>Por</b> | Charge | 0.00    | 0.01    | -0.03   | -0.06   | 0.03    | 0.01    |
|            | Spin   | -0.50   | 0.35    | -0.27   | 0.00    | -0.34   | 0.12    |
| <b>Sub</b> | Charge | -0.01   | 0.00    | 0.23    | 0.21    | 0.16    | 0.11    |
|            | Spin   | 0.00    | 0.02    | -0.41   | 0.52    | -0.37   | 0.44    |



Table S7 Diclofenac

|            |        | c4'     |         |         |         | c5      |         |         |         |
|------------|--------|---------|---------|---------|---------|---------|---------|---------|---------|
|            |        | rc      |         | ts      |         | rc      |         | ts      |         |
|            |        | Doublet | Quartet | Doublet | Quartet | Doublet | Quartet | Doublet | Quartet |
| <b>Fe</b>  | Charge | 0.39    | 0.38    | 0.31    | 0.33    | 0.39    | 0.38    | 0.31    | 0.31    |
|            | Spin   | 1.33    | 1.21    | 1.81    | 1.38    | 1.31    | 1.19    | 1.70    | 1.62    |
| <b>O</b>   | Charge | -0.33   | -0.33   | -0.38   | -0.33   | -0.32   | -0.31   | -0.35   | -0.35   |
|            | Spin   | 0.79    | 0.86    | 0.02    | 0.75    | 0.81    | 0.88    | 0.15    | 0.64    |
| <b>SH</b>  | Charge | -0.07   | -0.07   | -0.19   | -0.11   | -0.08   | -0.09   | -0.21   | -0.16   |
|            | Spin   | -0.62   | 0.57    | -0.13   | 0.43    | -0.62   | 0.56    | -0.18   | 0.23    |
| <b>Por</b> | Charge | 0.31    | 0.32    | 0.19    | 0.19    | 0.30    | 0.31    | 0.21    | 0.17    |
|            | Spin   | -0.50   | 0.36    | -0.23   | 0.10    | -0.51   | 0.37    | -0.26   | -0.06   |
| <b>Sub</b> | Charge | -0.30   | -0.30   | 0.07    | -0.08   | -0.29   | -0.29   | 0.04    | 0.03    |
|            | Spin   | 0.00    | 0.01    | -0.47   | 0.35    | 0.01    | 0.01    | -0.41   | 0.57    |

iii) Cartesian coordinates of optimized reactant complexes (RC) and transition states (TS)

Ibuprofen RC Quartet

|    |          |           |           |
|----|----------|-----------|-----------|
| H  | 8.128581 | 23.676368 | -2.173737 |
| S  | 7.702558 | 23.871585 | -0.873825 |
| O  | 5.012082 | 26.923476 | -1.813775 |
| Fe | 6.017241 | 25.658647 | -1.447384 |
| N  | 5.750926 | 24.782571 | -3.236582 |
| N  | 4.513406 | 24.565741 | -0.683660 |
| N  | 6.455518 | 26.336703 | 0.397701  |
| N  | 7.692285 | 26.533573 | -2.142126 |
| C  | 6.465322 | 25.013559 | -4.396392 |
| C  | 5.902068 | 24.255977 | -5.490327 |
| C  | 4.836206 | 23.564144 | -4.987249 |
| C  | 4.743292 | 23.896258 | -3.584058 |
| C  | 3.674289 | 23.710707 | -1.373897 |
| C  | 2.658433 | 23.185731 | -0.488356 |
| C  | 2.886541 | 23.731393 | 0.743533  |
| C  | 4.044472 | 24.588577 | 0.614446  |
| C  | 5.724995 | 26.121112 | 1.557634  |
| C  | 6.304995 | 26.863055 | 2.655488  |
| C  | 7.386507 | 27.531677 | 2.157005  |
| C  | 7.478931 | 27.199820 | 0.752287  |
| C  | 8.559881 | 27.362140 | -1.442161 |
| C  | 9.572926 | 27.888525 | -2.327413 |
| C  | 9.316077 | 27.389904 | -3.570553 |
| C  | 8.147595 | 26.546146 | -3.459012 |
| C  | 7.574894 | 25.844446 | -4.501357 |
| H  | 8.032173 | 25.941194 | -5.480307 |
| C  | 3.784137 | 23.395175 | -2.719465 |
| H  | 3.054529 | 22.704567 | -3.130848 |
| C  | 4.606155 | 25.313415 | 1.657226  |
| H  | 4.131775 | 25.235785 | 2.630092  |
| C  | 8.455686 | 27.685688 | -0.102583 |
| H  | 9.185466 | 28.384280 | 0.293179  |

|   |           |           |           |
|---|-----------|-----------|-----------|
| C | 6.837275  | 29.736755 | -4.218445 |
| C | 6.446495  | 29.455983 | -2.900498 |
| C | 7.031418  | 30.133007 | -1.826276 |
| C | 8.023508  | 31.097063 | -2.037014 |
| C | 8.415574  | 31.391372 | -3.354639 |
| C | 7.819874  | 30.724302 | -4.427178 |
| H | 8.128067  | 30.957661 | -5.443882 |
| H | 9.193146  | 32.129140 | -3.531345 |
| H | 6.728950  | 29.884757 | -0.813288 |
| H | 5.712467  | 28.687064 | -2.690860 |
| C | 8.686986  | 31.788508 | -0.843614 |
| C | 10.127323 | 31.326769 | -0.793733 |
| O | 10.981959 | 32.132424 | -1.515807 |
| O | 10.534796 | 30.300301 | -0.231018 |
| H | 8.223865  | 31.395800 | 0.068500  |
| C | 8.535434  | 33.320941 | -0.887509 |
| H | 8.983481  | 33.723823 | -1.800324 |
| H | 9.024836  | 33.792237 | -0.026575 |
| H | 7.470363  | 33.576176 | -0.874573 |
| C | 6.284150  | 28.972789 | -5.408580 |
| C | 4.994913  | 28.158059 | -5.173472 |
| C | 3.804940  | 29.062282 | -4.802635 |
| C | 4.664032  | 27.349711 | -6.441675 |
| H | 4.381258  | 28.034279 | -7.254903 |
| H | 3.823742  | 26.668966 | -6.259014 |
| H | 5.522379  | 26.750474 | -6.768693 |
| H | 3.597154  | 29.765172 | -5.623023 |
| H | 4.008326  | 29.641692 | -3.896026 |
| H | 2.905168  | 28.458197 | -4.629712 |
| H | 5.166658  | 27.457714 | -4.346621 |
| H | 7.063199  | 28.275843 | -5.759051 |
| H | 6.107970  | 29.675726 | -6.238567 |
| H | 6.282329  | 24.268001 | -6.501390 |
| H | 4.165973  | 22.890011 | -5.501527 |
| H | 1.883772  | 22.493856 | -0.787928 |
| H | 2.339054  | 23.577684 | 1.662450  |
| H | 5.921349  | 26.856873 | 3.665901  |
| H | 8.076456  | 28.184120 | 2.672986  |
| H | 10.350447 | 28.564058 | -2.005507 |
| H | 9.848262  | 27.570840 | -4.493175 |
| H | 11.891711 | 31.760734 | -1.505983 |

\*

Ibuprofen RC Doublet

|    |          |           |           |
|----|----------|-----------|-----------|
| H  | 8.123134 | 23.665273 | -2.205484 |
| S  | 7.748345 | 23.875396 | -0.892302 |
| O  | 5.036089 | 26.934265 | -1.810954 |
| Fe | 6.004183 | 25.647545 | -1.440727 |
| N  | 5.742567 | 24.768064 | -3.229524 |
| N  | 4.512743 | 24.545903 | -0.675819 |
| N  | 6.449800 | 26.320402 | 0.405801  |
| N  | 7.685329 | 26.522207 | -2.136277 |
| C  | 6.456138 | 25.002764 | -4.389488 |
| C  | 5.893127 | 24.245655 | -5.483812 |
| C  | 4.827058 | 23.552990 | -4.981891 |
| C  | 4.734394 | 23.882944 | -3.578282 |
| C  | 3.672864 | 23.690254 | -1.365942 |
| C  | 2.665086 | 23.156284 | -0.477317 |
| C  | 2.898505 | 23.695667 | 0.756525  |
| C  | 4.050361 | 24.559887 | 0.625586  |
| C  | 5.722337 | 26.101924 | 1.566753  |

|                         |           |           |           |
|-------------------------|-----------|-----------|-----------|
| C                       | 6.297327  | 26.851357 | 2.662173  |
| C                       | 7.373540  | 27.526404 | 2.160925  |
| C                       | 7.466677  | 27.192786 | 0.756554  |
| C                       | 8.546106  | 27.359383 | -1.438221 |
| C                       | 9.553425  | 27.893250 | -2.325591 |
| C                       | 9.297823  | 27.393029 | -3.568304 |
| C                       | 8.135397  | 26.540671 | -3.454973 |
| C                       | 7.562522  | 25.837793 | -4.496159 |
| H                       | 8.015997  | 25.938599 | -5.476388 |
| C                       | 3.776848  | 23.380069 | -2.713128 |
| H                       | 3.045799  | 22.690891 | -3.124278 |
| C                       | 4.609856  | 25.285976 | 1.668545  |
| H                       | 4.138191  | 25.203588 | 2.642308  |
| C                       | 8.440285  | 27.683718 | -0.099336 |
| H                       | 9.167174  | 28.386053 | 0.295201  |
| C                       | 6.847832  | 29.745404 | -4.225994 |
| C                       | 6.452748  | 29.468714 | -2.908507 |
| C                       | 7.035233  | 30.147639 | -1.834088 |
| C                       | 8.028768  | 31.110306 | -2.044413 |
| C                       | 8.426355  | 31.399285 | -3.361543 |
| C                       | 7.833108  | 30.730158 | -4.434330 |
| H                       | 8.145080  | 30.960301 | -5.450622 |
| H                       | 9.205710  | 32.135406 | -3.537591 |
| H                       | 6.729157  | 29.901666 | -0.821630 |
| H                       | 5.721049  | 28.698271 | -2.697457 |
| C                       | 8.688757  | 31.805219 | -0.851114 |
| C                       | 10.125870 | 31.335082 | -0.789821 |
| O                       | 10.991884 | 32.136265 | -1.503153 |
| O                       | 10.521332 | 30.304893 | -0.225389 |
| H                       | 8.218081  | 31.420027 | 0.060417  |
| C                       | 8.545531  | 33.338035 | -0.904828 |
| H                       | 9.000865  | 33.732973 | -1.817526 |
| H                       | 9.032500  | 33.812210 | -0.044148 |
| H                       | 7.481714  | 33.598716 | -0.899738 |
| C                       | 6.293512  | 28.979847 | -5.414655 |
| C                       | 4.995527  | 28.178799 | -5.176459 |
| C                       | 3.814015  | 29.099431 | -4.820855 |
| C                       | 4.664781  | 27.356487 | -6.433870 |
| H                       | 4.451152  | 28.027932 | -7.278887 |
| H                       | 3.785186  | 26.722875 | -6.266202 |
| H                       | 5.502804  | 26.706528 | -6.714913 |
| H                       | 3.617148  | 29.795400 | -5.649860 |
| H                       | 4.020624  | 29.686939 | -3.920126 |
| H                       | 2.906821  | 28.507431 | -4.644881 |
| H                       | 5.161841  | 27.486517 | -4.341176 |
| H                       | 7.066833  | 28.274031 | -5.760085 |
| H                       | 6.125128  | 29.680001 | -6.248610 |
| H                       | 6.272461  | 24.261186 | -6.495111 |
| H                       | 4.156863  | 22.879771 | -5.497405 |
| H                       | 1.891924  | 22.462205 | -0.775738 |
| H                       | 2.357370  | 23.533694 | 1.677782  |
| H                       | 5.914593  | 26.845022 | 3.672938  |
| H                       | 8.058855  | 28.185361 | 2.674832  |
| H                       | 10.326225 | 28.574216 | -2.003886 |
| H                       | 9.825699  | 27.579365 | -4.492293 |
| H                       | 11.899037 | 31.758505 | -1.485936 |
| *                       |           |           |           |
| Ibuprofen C2 TS Quartet |           |           |           |
| H                       | 6.716551  | 22.793184 | -1.679988 |
| S                       | 7.646709  | 23.778392 | -1.411158 |

|    |           |           |           |
|----|-----------|-----------|-----------|
| O  | 5.085239  | 26.909257 | -2.155837 |
| Fe | 6.162270  | 25.575836 | -1.750848 |
| N  | 5.993679  | 24.842188 | -3.644262 |
| N  | 4.616616  | 24.455166 | -1.183505 |
| N  | 6.368762  | 26.269649 | 0.095672  |
| N  | 7.816352  | 26.589773 | -2.314784 |
| C  | 6.861542  | 25.056798 | -4.701654 |
| C  | 6.400871  | 24.335161 | -5.866676 |
| C  | 5.248487  | 23.690851 | -5.508637 |
| C  | 5.004199  | 24.003945 | -4.118878 |
| C  | 3.796279  | 23.685972 | -2.001623 |
| C  | 2.745221  | 23.085189 | -1.211257 |
| C  | 2.929950  | 23.491022 | 0.080289  |
| C  | 4.087864  | 24.356635 | 0.091880  |
| C  | 5.600249  | 25.936523 | 1.200107  |
| C  | 6.045631  | 26.684290 | 2.355587  |
| C  | 7.087536  | 27.467691 | 1.949537  |
| C  | 7.300865  | 27.199813 | 0.544232  |
| C  | 8.569016  | 27.443862 | -1.535296 |
| C  | 9.660911  | 27.992269 | -2.305293 |
| C  | 9.567793  | 27.459499 | -3.559639 |
| C  | 8.418494  | 26.582443 | -3.564960 |
| C  | 7.985580  | 25.867050 | -4.668009 |
| H  | 8.567583  | 25.953363 | -5.579759 |
| C  | 3.962503  | 23.487209 | -3.360524 |
| H  | 3.245482  | 22.847011 | -3.863967 |
| C  | 4.553516  | 25.031843 | 1.208232  |
| H  | 4.039422  | 24.864702 | 2.148563  |
| C  | 8.322077  | 27.750717 | -0.205527 |
| H  | 8.982356  | 28.470786 | 0.266590  |
| C  | 6.621373  | 29.739450 | -3.742305 |
| C  | 6.412201  | 29.662761 | -2.356116 |
| C  | 7.143019  | 30.471409 | -1.481794 |
| C  | 8.110629  | 31.361294 | -1.960285 |
| C  | 8.328024  | 31.444308 | -3.345625 |
| C  | 7.580003  | 30.652789 | -4.220556 |
| H  | 7.753895  | 30.724925 | -5.292020 |
| H  | 9.089581  | 32.114283 | -3.733003 |
| H  | 6.983316  | 30.379494 | -0.411322 |
| H  | 5.721092  | 28.935388 | -1.949455 |
| C  | 8.966354  | 32.154927 | -0.970591 |
| C  | 10.304491 | 31.446908 | -0.898697 |
| O  | 11.245817 | 31.976223 | -1.755934 |
| O  | 10.546732 | 30.445673 | -0.211101 |
| H  | 8.522087  | 32.033995 | 0.024382  |
| C  | 9.071210  | 33.651278 | -1.312318 |
| H  | 9.522904  | 33.792907 | -2.297931 |
| H  | 9.688683  | 34.179418 | -0.576400 |
| H  | 8.068263  | 34.091805 | -1.316382 |
| C  | 5.912258  | 28.832308 | -4.735458 |
| C  | 4.611744  | 28.165496 | -4.293735 |
| C  | 3.528074  | 29.099061 | -3.771507 |
| C  | 4.085118  | 27.152156 | -5.299260 |
| H  | 3.653977  | 27.678694 | -6.168085 |
| H  | 3.294293  | 26.538083 | -4.851745 |
| H  | 4.877418  | 26.489757 | -5.657755 |
| H  | 3.132990  | 29.701993 | -4.607037 |
| H  | 3.906126  | 29.784860 | -3.007944 |
| H  | 2.697780  | 28.522512 | -3.346544 |
| H  | 4.927927  | 27.449484 | -3.256176 |

|   |           |           |           |
|---|-----------|-----------|-----------|
| H | 6.609377  | 28.039233 | -5.041692 |
| H | 5.695838  | 29.413410 | -5.651571 |
| H | 6.904094  | 24.335242 | -6.823321 |
| H | 4.616881  | 23.053743 | -6.111728 |
| H | 1.976834  | 22.438363 | -1.611738 |
| H | 2.342269  | 23.248589 | 0.954269  |
| H | 5.605097  | 26.603092 | 3.339288  |
| H | 7.683873  | 28.155677 | 2.532063  |
| H | 10.380174 | 28.690220 | -1.904876 |
| H | 10.202712 | 27.633867 | -4.416945 |
| H | 12.074869 | 31.449939 | -1.720355 |

\*

Ibuprofen C2 TS Doublet

|    |           |           |           |
|----|-----------|-----------|-----------|
| H  | 8.498120  | 23.946339 | -2.132486 |
| S  | 7.628451  | 23.845223 | -1.062776 |
| O  | 4.984743  | 26.927283 | -2.083506 |
| Fe | 6.111747  | 25.588627 | -1.818075 |
| N  | 5.991364  | 24.822283 | -3.658485 |
| N  | 4.550865  | 24.476510 | -1.212307 |
| N  | 6.307385  | 26.301915 | 0.068774  |
| N  | 7.779057  | 26.566894 | -2.362679 |
| C  | 6.846404  | 25.028411 | -4.729178 |
| C  | 6.397175  | 24.280196 | -5.880741 |
| C  | 5.264330  | 23.613934 | -5.503334 |
| C  | 5.021844  | 23.944418 | -4.117665 |
| C  | 3.772202  | 23.660067 | -2.008602 |
| C  | 2.699306  | 23.078973 | -1.228685 |
| C  | 2.834646  | 23.554028 | 0.045075  |
| C  | 3.986339  | 24.431995 | 0.045688  |
| C  | 5.498259  | 26.027680 | 1.157936  |
| C  | 5.936099  | 26.791934 | 2.308952  |
| C  | 7.012666  | 27.529468 | 1.909067  |
| C  | 7.245793  | 27.215104 | 0.513071  |
| C  | 8.541697  | 27.409170 | -1.567214 |
| C  | 9.657183  | 27.935360 | -2.319377 |
| C  | 9.574665  | 27.409424 | -3.576894 |
| C  | 8.408046  | 26.557662 | -3.602389 |
| C  | 7.972642  | 25.840238 | -4.703127 |
| H  | 8.556496  | 25.916297 | -5.614982 |
| C  | 3.986192  | 23.420756 | -3.357726 |
| H  | 3.296512  | 22.748049 | -3.858352 |
| C  | 4.430173  | 25.147066 | 1.150937  |
| H  | 3.884565  | 25.016272 | 2.080030  |
| C  | 8.283189  | 27.732813 | -0.245527 |
| H  | 8.953121  | 28.448909 | 0.220340  |
| C  | 6.601453  | 29.697825 | -3.700430 |
| C  | 6.387993  | 29.654350 | -2.313539 |
| C  | 7.136198  | 30.464571 | -1.455093 |
| C  | 8.124932  | 31.321635 | -1.950239 |
| C  | 8.345385  | 31.372087 | -3.336815 |
| C  | 7.580881  | 30.579555 | -4.196205 |
| H  | 7.757940  | 30.625162 | -5.268661 |
| H  | 9.122029  | 32.016828 | -3.737078 |
| H  | 6.973000  | 30.399533 | -0.382960 |
| H  | 5.682469  | 28.946911 | -1.895773 |
| C  | 8.999847  | 32.115766 | -0.977833 |
| C  | 10.327648 | 31.387904 | -0.905286 |
| O  | 11.284710 | 31.914968 | -1.745788 |
| O  | 10.549208 | 30.373795 | -0.229249 |
| H  | 8.560380  | 32.016241 | 0.021759  |

|                         |           |           |           |
|-------------------------|-----------|-----------|-----------|
| C                       | 9.123790  | 33.605322 | -1.341798 |
| H                       | 9.568544  | 33.726649 | -2.333286 |
| H                       | 9.756316  | 34.134182 | -0.619320 |
| H                       | 8.127573  | 34.060726 | -1.342979 |
| C                       | 5.873069  | 28.787814 | -4.676587 |
| C                       | 4.571708  | 28.140268 | -4.214891 |
| C                       | 3.497259  | 29.099161 | -3.717606 |
| C                       | 4.029794  | 27.117086 | -5.203565 |
| H                       | 3.584011  | 27.633948 | -6.070493 |
| H                       | 3.246761  | 26.508052 | -4.735607 |
| H                       | 4.816392  | 26.450784 | -5.568443 |
| H                       | 3.103713  | 29.680533 | -4.568664 |
| H                       | 3.884699  | 29.802454 | -2.974874 |
| H                       | 2.665410  | 28.541085 | -3.271727 |
| H                       | 4.855478  | 27.452945 | -3.169391 |
| H                       | 6.559738  | 27.986352 | -4.985147 |
| H                       | 5.652964  | 29.362779 | -5.595738 |
| H                       | 6.895460  | 24.274270 | -6.839929 |
| H                       | 4.646084  | 22.949619 | -6.090680 |
| H                       | 1.954833  | 22.400043 | -1.620874 |
| H                       | 2.223985  | 23.345316 | 0.912079  |
| H                       | 5.470067  | 26.751066 | 3.283373  |
| H                       | 7.616634  | 28.214182 | 2.487606  |
| H                       | 10.384223 | 28.616922 | -1.904912 |
| H                       | 10.228407 | 27.573256 | -4.422150 |
| H                       | 12.106737 | 31.377858 | -1.707669 |
| *                       |           |           |           |
| Ibuprofen C3 TS Quartet |           |           |           |
| H                       | 7.859067  | 23.527615 | -1.467543 |
| S                       | 7.321380  | 24.051287 | -0.309141 |
| O                       | 5.292421  | 27.115125 | -2.218489 |
| Fe                      | 6.134555  | 25.844985 | -1.413553 |
| N                       | 5.739736  | 24.530220 | -2.893071 |
| N                       | 4.482662  | 25.271164 | -0.444442 |
| N                       | 6.630697  | 27.013634 | 0.134364  |
| N                       | 7.901319  | 26.271120 | -2.300908 |
| C                       | 6.490942  | 24.297889 | -4.035063 |
| C                       | 5.816671  | 23.339808 | -4.881543 |
| C                       | 4.657503  | 22.991582 | -4.246473 |
| C                       | 4.614140  | 23.735359 | -3.007590 |
| C                       | 3.535928  | 24.359943 | -0.888504 |
| C                       | 2.461914  | 24.255706 | 0.075040  |
| C                       | 2.762112  | 25.104355 | 1.101737  |
| C                       | 4.022202  | 25.735132 | 0.775114  |
| C                       | 5.875396  | 27.264877 | 1.268978  |
| C                       | 6.538075  | 28.250070 | 2.095645  |
| C                       | 7.696530  | 28.596032 | 1.459552  |
| C                       | 7.756002  | 27.816789 | 0.243239  |
| C                       | 8.850449  | 27.176178 | -1.856974 |
| C                       | 9.929132  | 27.271444 | -2.812424 |
| C                       | 9.636562  | 26.412012 | -3.834032 |
| C                       | 8.371395  | 25.791818 | -3.515617 |
| C                       | 7.714031  | 24.880904 | -4.324982 |
| H                       | 8.192396  | 24.603396 | -5.258292 |
| C                       | 3.590383  | 23.653634 | -2.076040 |
| H                       | 2.768650  | 22.979871 | -2.295159 |
| C                       | 4.664005  | 26.668377 | 1.572097  |
| H                       | 4.183489  | 26.950229 | 2.502878  |
| C                       | 8.780053  | 27.903421 | -0.680408 |
| H                       | 9.568246  | 28.619643 | -0.477671 |

|   |           |           |           |
|---|-----------|-----------|-----------|
| C | 7.344270  | 30.019196 | -3.235273 |
| C | 6.770812  | 30.000364 | -1.949683 |
| C | 7.184268  | 30.903773 | -0.968482 |
| C | 8.194732  | 31.836698 | -1.232384 |
| C | 8.761732  | 31.877703 | -2.516567 |
| C | 8.330980  | 30.985426 | -3.504550 |
| H | 8.791732  | 31.007595 | -4.488841 |
| H | 9.557449  | 32.585615 | -2.732297 |
| H | 6.760954  | 30.842056 | 0.029420  |
| H | 6.054406  | 29.229567 | -1.695672 |
| C | 8.725985  | 32.731994 | -0.113164 |
| C | 10.119714 | 32.256016 | 0.247572  |
| O | 10.092127 | 31.054227 | 0.949945  |
| O | 11.185463 | 32.800835 | -0.046329 |
| H | 8.094832  | 32.574462 | 0.769955  |
| C | 8.743086  | 34.223417 | -0.488283 |
| H | 9.413002  | 34.394680 | -1.336704 |
| H | 9.099701  | 34.833699 | 0.349483  |
| H | 7.732808  | 34.544074 | -0.762721 |
| C | 7.010193  | 28.955932 | -4.257452 |
| C | 5.577075  | 28.944882 | -4.863180 |
| C | 4.488352  | 28.844725 | -3.804688 |
| C | 5.475274  | 27.759813 | -5.842622 |
| H | 6.259926  | 27.809306 | -6.609682 |
| H | 4.498558  | 27.747710 | -6.343117 |
| H | 5.590943  | 26.818492 | -5.288595 |
| H | 4.380053  | 29.741223 | -3.184501 |
| H | 4.858149  | 27.953723 | -2.977787 |
| H | 3.522784  | 28.505114 | -4.196597 |
| H | 5.437685  | 29.889140 | -5.421069 |
| H | 7.137842  | 27.978268 | -3.785408 |
| H | 7.727054  | 29.017546 | -5.086956 |
| H | 6.196622  | 22.991261 | -5.830933 |
| H | 3.893194  | 22.298646 | -4.569339 |
| H | 1.601243  | 23.612002 | -0.039656 |
| H | 2.198996  | 25.299573 | 2.003508  |
| H | 6.147420  | 28.617524 | 3.033601  |
| H | 8.443604  | 29.324885 | 1.740340  |
| H | 10.785619 | 27.920256 | -2.698992 |
| H | 10.206602 | 26.209037 | -4.729766 |
| H | 11.009216 | 30.760220 | 1.144840  |

\*

| Ibuprofen | C3       | TS        | Doublet |           |
|-----------|----------|-----------|---------|-----------|
| H         | 7.948732 | 23.557484 |         | -1.480340 |
| S         | 7.373206 | 24.023460 |         | -0.313957 |
| O         | 5.185684 | 27.115807 |         | -2.220865 |
| Fe        | 6.146716 | 25.887347 |         | -1.469094 |
| N         | 5.792638 | 24.530836 |         | -2.914410 |
| N         | 4.531410 | 25.234203 |         | -0.456151 |
| N         | 6.642380 | 27.043254 |         | 0.100849  |
| N         | 7.898262 | 26.330947 |         | -2.343607 |
| C         | 6.534668 | 24.319034 |         | -4.067196 |
| C         | 5.887388 | 23.327759 |         | -4.895314 |
| C         | 4.753437 | 22.937406 |         | -4.239831 |
| C         | 4.695915 | 23.688047 |         | -3.006166 |
| C         | 3.613403 | 24.290608 |         | -0.883487 |
| C         | 2.546796 | 24.164374 |         | 0.086152  |
| C         | 2.823154 | 25.037752 |         | 1.098975  |
| C         | 4.062255 | 25.702331 |         | 0.757916  |
| C         | 5.885218 | 27.274933 |         | 1.238180  |

|                     |           |           |           |
|---------------------|-----------|-----------|-----------|
| C                   | 6.543565  | 28.251389 | 2.078974  |
| C                   | 7.704335  | 28.605748 | 1.451309  |
| C                   | 7.763480  | 27.845527 | 0.223131  |
| C                   | 8.845358  | 27.241082 | -1.892459 |
| C                   | 9.913818  | 27.359745 | -2.854635 |
| C                   | 9.623386  | 26.510580 | -3.885643 |
| C                   | 8.370595  | 25.869208 | -3.566639 |
| C                   | 7.731208  | 24.945039 | -4.374865 |
| H                   | 8.207833  | 24.684537 | -5.313844 |
| C                   | 3.685556  | 23.575111 | -2.066006 |
| H                   | 2.887895  | 22.869413 | -2.273192 |
| C                   | 4.684353  | 26.658074 | 1.543624  |
| H                   | 4.201426  | 26.933868 | 2.475103  |
| C                   | 8.783172  | 27.948879 | -0.705482 |
| H                   | 9.570445  | 28.664622 | -0.498070 |
| C                   | 7.281130  | 30.024152 | -3.216408 |
| C                   | 6.717520  | 30.014545 | -1.926579 |
| C                   | 7.163985  | 30.901904 | -0.944951 |
| C                   | 8.200051  | 31.805343 | -1.212225 |
| C                   | 8.759080  | 31.835672 | -2.500184 |
| C                   | 8.293876  | 30.962158 | -3.488979 |
| H                   | 8.747462  | 30.975324 | -4.476774 |
| H                   | 9.575300  | 32.519329 | -2.717719 |
| H                   | 6.746687  | 30.848209 | 0.055911  |
| H                   | 5.984230  | 29.260041 | -1.670649 |
| C                   | 8.766337  | 32.680968 | -0.094201 |
| C                   | 10.161460 | 32.182383 | 0.226002  |
| O                   | 10.134812 | 30.990911 | 0.946045  |
| O                   | 11.226955 | 32.700098 | -0.114467 |
| H                   | 8.152413  | 32.521944 | 0.800387  |
| C                   | 8.794835  | 34.175980 | -0.454803 |
| H                   | 9.445412  | 34.345987 | -1.318320 |
| H                   | 9.180471  | 34.772829 | 0.379970  |
| H                   | 7.782465  | 34.512933 | -0.700420 |
| C                   | 6.908371  | 28.976561 | -4.240807 |
| C                   | 5.467100  | 29.001427 | -4.823866 |
| C                   | 4.394815  | 28.909664 | -3.747516 |
| C                   | 5.327140  | 27.826921 | -5.811601 |
| H                   | 6.097408  | 27.870722 | -6.593418 |
| H                   | 4.340803  | 27.833862 | -6.292857 |
| H                   | 5.439066  | 26.879876 | -5.266449 |
| H                   | 4.321753  | 29.794760 | -3.106897 |
| H                   | 4.753475  | 27.982582 | -2.955071 |
| H                   | 3.413213  | 28.605871 | -4.129079 |
| H                   | 5.336278  | 29.953345 | -5.370338 |
| H                   | 7.018811  | 27.993295 | -3.776210 |
| H                   | 7.614996  | 29.027251 | -5.079779 |
| H                   | 6.267358  | 22.986316 | -5.847260 |
| H                   | 4.014114  | 22.210512 | -4.545867 |
| H                   | 1.707050  | 23.491424 | -0.015601 |
| H                   | 2.258029  | 25.227482 | 2.000658  |
| H                   | 6.151857  | 28.603458 | 3.022412  |
| H                   | 8.452106  | 29.328347 | 1.745463  |
| H                   | 10.764077 | 28.016296 | -2.739041 |
| H                   | 10.190527 | 26.324711 | -4.786897 |
| H                   | 11.051981 | 30.680507 | 1.113520  |
| *                   |           |           |           |
| Warfarin RC Doublet |           |           |           |
| H                   | 1.964654  | -1.801399 | -1.087084 |
| S                   | 1.512707  | -1.232044 | 0.087817  |



|                     |           |           |           |
|---------------------|-----------|-----------|-----------|
| O                   | -0.705844 | 1.780109  | -1.806233 |
| Fe                  | 0.071841  | 0.542953  | -1.041123 |
| N                   | -0.025547 | -0.663230 | -2.643620 |
| N                   | -1.621879 | -0.255582 | -0.325425 |
| N                   | 0.320864  | 1.549598  | 0.684859  |
| N                   | 1.918262  | 1.122580  | -1.613762 |
| C                   | 0.824707  | -0.668989 | -3.732321 |
| C                   | 0.346944  | -1.597454 | -4.733651 |
| C                   | -0.795856 | -2.161072 | -4.239744 |
| C                   | -1.030777 | -1.568530 | -2.941465 |
| C                   | -2.406960 | -1.218783 | -0.928998 |
| C                   | -3.597019 | -1.457011 | -0.141623 |
| C                   | -3.533378 | -0.619052 | 0.936385  |
| C                   | -2.296876 | 0.122666  | 0.817982  |
| C                   | -0.620675 | 1.698881  | 1.693435  |
| C                   | -0.114027 | 2.586565  | 2.716862  |
| C                   | 1.145964  | 2.958049  | 2.333593  |
| C                   | 1.405052  | 2.319815  | 1.062011  |
| C                   | 2.790890  | 1.966244  | -0.932329 |
| C                   | 3.953636  | 2.244190  | -1.745551 |
| C                   | 3.780863  | 1.584355  | -2.927631 |
| C                   | 2.517633  | 0.883405  | -2.846877 |
| C                   | 1.997762  | 0.069693  | -3.836482 |
| H                   | 2.569843  | -0.030054 | -4.752965 |
| C                   | -2.123056 | -1.843673 | -2.135071 |
| H                   | -2.833227 | -2.582856 | -2.492139 |
| C                   | -1.842708 | 1.050529  | 1.745995  |
| H                   | -2.480768 | 1.254664  | 2.599709  |
| C                   | 2.559321  | 2.507797  | 0.315074  |
| H                   | 3.319618  | 3.162157  | 0.726981  |
| C                   | 2.228716  | 5.204257  | -1.387698 |
| C                   | 1.349674  | 5.418100  | -0.305984 |
| C                   | -0.024855 | 5.157765  | -0.496133 |
| C                   | -0.486172 | 4.665820  | -1.709542 |
| C                   | 0.416063  | 4.438388  | -2.767172 |
| C                   | 1.770765  | 4.718968  | -2.615715 |
| C                   | 1.937582  | 5.853358  | 0.944774  |
| C                   | 3.274730  | 6.099596  | 1.057034  |
| C                   | 4.185303  | 5.908195  | -0.045024 |
| O                   | 3.592969  | 5.426249  | -1.262864 |
| O                   | 1.157949  | 6.021340  | 2.069783  |
| O                   | 5.406171  | 6.065696  | -0.044872 |
| H                   | -0.732415 | 5.334647  | 0.308411  |
| H                   | -1.531365 | 4.414920  | -1.835059 |
| H                   | 0.051693  | 4.015304  | -3.695572 |
| H                   | 2.489582  | 4.539688  | -3.404904 |
| H                   | 0.341000  | 5.484091  | 2.035611  |
| H                   | 0.838965  | -1.785822 | -5.677065 |
| H                   | -1.435008 | -2.902580 | -4.697992 |
| H                   | -4.368824 | -2.168766 | -0.398246 |
| H                   | -4.239106 | -0.507484 | 1.747481  |
| H                   | -0.647257 | 2.844736  | 3.621282  |
| H                   | 1.846578  | 3.598880  | 2.848438  |
| H                   | 4.761971  | 2.895518  | -1.447100 |
| H                   | 4.438455  | 1.558702  | -3.785072 |
| H                   | 3.695872  | 6.421214  | 1.999286  |
| *                   |           |           |           |
| Warfarin RC Quartet |           |           |           |
| H                   | 1.990545  | -1.751498 | -1.090382 |
| S                   | 1.491949  | -1.222487 | 0.084179  |

|                        |           |           |           |
|------------------------|-----------|-----------|-----------|
| O                      | -0.720111 | 1.773057  | -1.799891 |
| Fe                     | 0.081340  | 0.544008  | -1.038481 |
| N                      | -0.023207 | -0.654374 | -2.644693 |
| N                      | -1.620326 | -0.245624 | -0.328653 |
| N                      | 0.326517  | 1.551538  | 0.687474  |
| N                      | 1.922327  | 1.126918  | -1.614688 |
| C                      | 0.826897  | -0.660377 | -3.734810 |
| C                      | 0.349100  | -1.590472 | -4.734782 |
| C                      | -0.791521 | -2.155898 | -4.238882 |
| C                      | -1.026720 | -1.562485 | -2.940878 |
| C                      | -2.406669 | -1.207807 | -0.932713 |
| C                      | -3.601075 | -1.439291 | -0.149399 |
| C                      | -3.538845 | -0.599514 | 0.926608  |
| C                      | -2.298366 | 0.136869  | 0.812907  |
| C                      | -0.615169 | 1.701476  | 1.695096  |
| C                      | -0.106473 | 2.584763  | 2.721021  |
| C                      | 1.154481  | 2.954841  | 2.338844  |
| C                      | 1.412825  | 2.317932  | 1.066670  |
| C                      | 2.797567  | 1.964346  | -0.929119 |
| C                      | 3.961935  | 2.240544  | -1.740759 |
| C                      | 3.788599  | 1.582802  | -2.923952 |
| C                      | 2.522255  | 0.886900  | -2.845745 |
| C                      | 2.000375  | 0.076302  | -3.838014 |
| H                      | 2.573402  | -0.023706 | -4.753865 |
| C                      | -2.119776 | -1.836993 | -2.135452 |
| H                      | -2.829257 | -2.576940 | -2.492263 |
| C                      | -1.841098 | 1.058896  | 1.743871  |
| H                      | -2.479116 | 1.263675  | 2.597471  |
| C                      | 2.565960  | 2.506342  | 0.318149  |
| H                      | 3.326124  | 3.161592  | 0.729030  |
| C                      | 2.219832  | 5.188259  | -1.388358 |
| C                      | 1.343343  | 5.401252  | -0.304158 |
| C                      | -0.030499 | 5.134614  | -0.489110 |
| C                      | -0.494272 | 4.638238  | -1.700072 |
| C                      | 0.405576  | 4.412641  | -2.760814 |
| C                      | 1.759662  | 4.698846  | -2.613953 |
| C                      | 1.933461  | 5.845521  | 0.942739  |
| C                      | 3.269631  | 6.099860  | 1.048732  |
| C                      | 4.177293  | 5.908781  | -0.055597 |
| O                      | 3.583054  | 5.418236  | -1.269389 |
| O                      | 1.157653  | 6.015410  | 2.069578  |
| O                      | 5.397378  | 6.071494  | -0.060522 |
| H                      | -0.737110 | 5.309281  | 0.316717  |
| H                      | -1.539433 | 4.385851  | -1.821863 |
| H                      | 0.039482  | 3.990298  | -3.688816 |
| H                      | 2.476853  | 4.521943  | -3.405216 |
| H                      | 0.341420  | 5.476894  | 2.040926  |
| H                      | 0.840313  | -1.778904 | -5.678615 |
| H                      | -1.429890 | -2.899037 | -4.695586 |
| H                      | -4.374839 | -2.148249 | -0.407909 |
| H                      | -4.247642 | -0.483489 | 1.734429  |
| H                      | -0.640302 | 2.843105  | 3.625068  |
| H                      | 1.855784  | 3.594329  | 2.854452  |
| H                      | 4.771253  | 2.889941  | -1.440844 |
| H                      | 4.446481  | 1.556691  | -3.781134 |
| H                      | 3.692049  | 6.428161  | 1.988114  |
| *                      |           |           |           |
| Warfarin C7 TS Quartet |           |           |           |
| H                      | 2.076578  | -1.571899 | -0.947216 |
| S                      | 1.316504  | -1.155093 | 0.127805  |

|                        |           |           |           |
|------------------------|-----------|-----------|-----------|
| O                      | -0.486643 | 1.960924  | -1.863728 |
| Fe                     | 0.230337  | 0.610085  | -1.057161 |
| N                      | 0.150786  | -0.518916 | -2.696590 |
| N                      | -1.566447 | -0.056462 | -0.494873 |
| N                      | 0.385917  | 1.636499  | 0.674140  |
| N                      | 2.100711  | 1.178785  | -1.545567 |
| C                      | 1.058113  | -0.526936 | -3.748091 |
| C                      | 0.603724  | -1.430405 | -4.781510 |
| C                      | -0.570423 | -1.977964 | -4.347532 |
| C                      | -0.857848 | -1.398550 | -3.054363 |
| C                      | -2.347352 | -0.995405 | -1.146482 |
| C                      | -3.604646 | -1.160311 | -0.450235 |
| C                      | -3.586485 | -0.305772 | 0.615190  |
| C                      | -2.308573 | 0.372978  | 0.592723  |
| C                      | -0.615156 | 1.834802  | 1.609386  |
| C                      | -0.123067 | 2.665347  | 2.686538  |
| C                      | 1.180117  | 2.961679  | 2.400711  |
| C                      | 1.492659  | 2.317761  | 1.144403  |
| C                      | 2.985502  | 1.911310  | -0.763515 |
| C                      | 4.221923  | 2.115209  | -1.485317 |
| C                      | 4.073838  | 1.529778  | -2.709850 |
| C                      | 2.752542  | 0.940684  | -2.741989 |
| C                      | 2.253364  | 0.171551  | -3.783300 |
| H                      | 2.871642  | 0.063865  | -4.668110 |
| C                      | -2.007081 | -1.643959 | -2.321260 |
| H                      | -2.715984 | -2.359975 | -2.723583 |
| C                      | -1.879595 | 1.270065  | 1.557949  |
| H                      | -2.568528 | 1.506981  | 2.361937  |
| C                      | 2.710005  | 2.429245  | 0.488163  |
| H                      | 3.494004  | 2.994941  | 0.980907  |
| C                      | 1.788516  | 4.697709  | -1.384753 |
| C                      | 1.189255  | 5.159959  | -0.179664 |
| C                      | -0.202390 | 4.925336  | 0.008970  |
| C                      | -0.946983 | 4.270367  | -0.940122 |
| C                      | -0.327900 | 3.758210  | -2.148818 |
| C                      | 1.059325  | 4.051939  | -2.363691 |
| C                      | 2.038827  | 5.837057  | 0.762651  |
| C                      | 3.379257  | 5.996389  | 0.531237  |
| C                      | 4.010494  | 5.518117  | -0.672475 |
| O                      | 3.139674  | 4.902854  | -1.630958 |
| O                      | 1.538721  | 6.364147  | 1.937637  |
| O                      | 5.197642  | 5.626039  | -0.984028 |
| H                      | -0.685249 | 5.221490  | 0.936595  |
| H                      | -1.993543 | 4.049494  | -0.770733 |
| H                      | -0.952752 | 3.678680  | -3.033225 |
| H                      | 1.558105  | 3.729841  | -3.268500 |
| H                      | 0.564943  | 6.376837  | 1.972541  |
| H                      | 1.133914  | -1.616361 | -5.704733 |
| H                      | -1.203603 | -2.698089 | -4.846534 |
| H                      | -4.387751 | -1.838914 | -0.757266 |
| H                      | -4.348501 | -0.146278 | 1.365302  |
| H                      | -0.710982 | 2.968191  | 3.541513  |
| H                      | 1.875362  | 3.565907  | 2.966320  |
| H                      | 5.073044  | 2.656191  | -1.098224 |
| H                      | 4.782474  | 1.485564  | -3.524625 |
| H                      | 4.000658  | 6.513781  | 1.248704  |
| *                      |           |           |           |
| Warfarin C7 TS Doublet |           |           |           |
| H                      | 2.024583  | -1.576414 | -0.903607 |
| S                      | 1.171563  | -1.214974 | 0.120288  |

|                        |           |           |           |
|------------------------|-----------|-----------|-----------|
| O                      | -0.527541 | 1.903796  | -1.960968 |
| Fe                     | 0.263577  | 0.693003  | -1.016809 |
| N                      | 0.189341  | -0.483098 | -2.649097 |
| N                      | -1.553713 | 0.027564  | -0.456793 |
| N                      | 0.401072  | 1.717042  | 0.688572  |
| N                      | 2.113746  | 1.240264  | -1.500495 |
| C                      | 1.088663  | -0.490755 | -3.700301 |
| C                      | 0.638920  | -1.410689 | -4.723447 |
| C                      | -0.529770 | -1.961156 | -4.279424 |
| C                      | -0.818218 | -1.366965 | -2.991110 |
| C                      | -2.323692 | -0.923243 | -1.102814 |
| C                      | -3.597176 | -1.062795 | -0.428153 |
| C                      | -3.598472 | -0.178225 | 0.612476  |
| C                      | -2.314892 | 0.491919  | 0.598614  |
| C                      | -0.611286 | 1.934450  | 1.614200  |
| C                      | -0.101854 | 2.712779  | 2.719034  |
| C                      | 1.230249  | 2.928832  | 2.477246  |
| C                      | 1.532948  | 2.319432  | 1.203496  |
| C                      | 3.015256  | 1.942838  | -0.712207 |
| C                      | 4.237769  | 2.174200  | -1.447633 |
| C                      | 4.074344  | 1.611709  | -2.680506 |
| C                      | 2.760722  | 1.007175  | -2.705328 |
| C                      | 2.272112  | 0.229054  | -3.743114 |
| H                      | 2.892333  | 0.126234  | -4.626914 |
| C                      | -1.971850 | -1.596488 | -2.260127 |
| H                      | -2.679391 | -2.318461 | -2.654430 |
| C                      | -1.889682 | 1.406066  | 1.549781  |
| H                      | -2.582984 | 1.667284  | 2.342196  |
| C                      | 2.759296  | 2.413869  | 0.560836  |
| H                      | 3.554545  | 2.945178  | 1.070656  |
| C                      | 1.745079  | 4.695817  | -1.503685 |
| C                      | 1.147275  | 5.065083  | -0.269696 |
| C                      | -0.241520 | 4.835573  | -0.095613 |
| C                      | -0.982698 | 4.227021  | -1.083034 |
| C                      | -0.349041 | 3.748339  | -2.287799 |
| C                      | 1.027772  | 4.062513  | -2.500889 |
| C                      | 2.001357  | 5.659601  | 0.729337  |
| C                      | 3.315989  | 5.930262  | 0.473343  |
| C                      | 3.937316  | 5.575181  | -0.778668 |
| O                      | 3.081485  | 4.974698  | -1.755321 |
| O                      | 1.510844  | 5.963088  | 1.981828  |
| O                      | 5.128029  | 5.691446  | -1.075728 |
| H                      | -0.732654 | 5.157410  | 0.816264  |
| H                      | -2.041871 | 4.044825  | -0.949268 |
| H                      | -0.968095 | 3.584897  | -3.161859 |
| H                      | 1.524645  | 3.793209  | -3.423504 |
| H                      | 0.751799  | 5.392317  | 2.222106  |
| H                      | 1.167081  | -1.602747 | -5.646490 |
| H                      | -1.159493 | -2.691378 | -4.767931 |
| H                      | -4.377582 | -1.745177 | -0.734032 |
| H                      | -4.375846 | 0.005950  | 1.340789  |
| H                      | -0.685112 | 2.998045  | 3.583909  |
| H                      | 1.954217  | 3.445132  | 3.091802  |
| H                      | 5.075992  | 2.746246  | -1.076865 |
| H                      | 4.769522  | 1.594412  | -3.507648 |
| H                      | 3.945990  | 6.364109  | 1.237229  |
| *                      |           |           |           |
| Warfarin C6 TS Quartet |           |           |           |
| H                      | 2.003940  | -1.531819 | -1.034412 |
| S                      | 1.310890  | -1.159152 | 0.100146  |

|                        |           |           |           |
|------------------------|-----------|-----------|-----------|
| O                      | -0.623520 | 2.025679  | -1.632825 |
| Fe                     | 0.164081  | 0.640372  | -0.922804 |
| N                      | -0.030664 | -0.406079 | -2.604825 |
| N                      | -1.589264 | -0.040534 | -0.274883 |
| N                      | 0.443793  | 1.597147  | 0.830760  |
| N                      | 1.997308  | 1.253207  | -1.525611 |
| C                      | 0.799948  | -0.362467 | -3.715730 |
| C                      | 0.276183  | -1.225888 | -4.752597 |
| C                      | -0.860136 | -1.801291 | -4.260032 |
| C                      | -1.057338 | -1.278898 | -2.925116 |
| C                      | -2.407065 | -0.961785 | -0.902522 |
| C                      | -3.613107 | -1.160529 | -0.126278 |
| C                      | -3.527829 | -0.342280 | 0.963119  |
| C                      | -2.257730 | 0.347721  | 0.877846  |
| C                      | -0.492645 | 1.763529  | 1.831529  |
| C                      | 0.078058  | 2.534280  | 2.913690  |
| C                      | 1.379210  | 2.801698  | 2.570087  |
| C                      | 1.598761  | 2.228710  | 1.262841  |
| C                      | 2.933488  | 1.948947  | -0.779007 |
| C                      | 4.106623  | 2.213657  | -1.583486 |
| C                      | 3.872154  | 1.678222  | -2.817786 |
| C                      | 2.560000  | 1.068796  | -2.773744 |
| C                      | 1.987527  | 0.343606  | -3.808707 |
| H                      | 2.541065  | 0.273853  | -4.739029 |
| C                      | -2.148701 | -1.564608 | -2.122624 |
| H                      | -2.880767 | -2.270462 | -2.500466 |
| C                      | -1.766816 | 1.209099  | 1.840905  |
| H                      | -2.398192 | 1.417141  | 2.698174  |
| C                      | 2.761789  | 2.381458  | 0.524581  |
| H                      | 3.580976  | 2.922105  | 0.985953  |
| C                      | 2.147579  | 4.907523  | -1.540881 |
| C                      | 1.207691  | 4.950969  | -0.479032 |
| C                      | -0.076577 | 4.450037  | -0.692984 |
| C                      | -0.426251 | 3.819029  | -1.932525 |
| C                      | 0.552002  | 3.853104  | -2.999715 |
| C                      | 1.814543  | 4.362363  | -2.795087 |
| C                      | 1.647555  | 5.572451  | 0.759607  |
| C                      | 2.893716  | 6.111118  | 0.880297  |
| C                      | 3.863816  | 6.058101  | -0.184337 |
| O                      | 3.419918  | 5.415923  | -1.398675 |
| O                      | 0.798656  | 5.658771  | 1.837980  |
| O                      | 5.024417  | 6.462569  | -0.167472 |
| H                      | -0.835471 | 4.529153  | 0.077584  |
| H                      | -1.473768 | 3.835324  | -2.215759 |
| H                      | 0.278926  | 3.426824  | -3.957367 |
| H                      | 2.570591  | 4.358518  | -3.569611 |
| H                      | 0.202846  | 4.881949  | 1.907757  |
| H                      | 0.740382  | -1.368760 | -5.718039 |
| H                      | -1.523289 | -2.505564 | -4.742392 |
| H                      | -4.411399 | -1.834912 | -0.402174 |
| H                      | -4.237704 | -0.214681 | 1.768350  |
| H                      | -0.441363 | 2.787973  | 3.827329  |
| H                      | 2.123064  | 3.350627  | 3.128780  |
| H                      | 4.969870  | 2.764817  | -1.240246 |
| H                      | 4.517526  | 1.677943  | -3.684812 |
| H                      | 3.201703  | 6.570708  | 1.808979  |
| *                      |           |           |           |
| Warfarin C7 TS Doublet |           |           |           |
| H                      | 1.987254  | -1.547929 | -1.045926 |
| S                      | 1.186684  | -1.263022 | 0.042207  |

|                           |           |           |           |
|---------------------------|-----------|-----------|-----------|
| O                         | -0.665570 | 1.951747  | -1.713485 |
| Fe                        | 0.215053  | 0.691254  | -0.926589 |
| N                         | 0.003817  | -0.392228 | -2.613035 |
| N                         | -1.556457 | -0.010155 | -0.261156 |
| N                         | 0.481016  | 1.649032  | 0.799195  |
| N                         | 2.024654  | 1.265425  | -1.527693 |
| C                         | 0.821316  | -0.352095 | -3.726330 |
| C                         | 0.286217  | -1.213753 | -4.760473 |
| C                         | -0.850211 | -1.780514 | -4.258560 |
| C                         | -1.033444 | -1.254884 | -2.921273 |
| C                         | -2.376306 | -0.924988 | -0.892940 |
| C                         | -3.590006 | -1.109242 | -0.123391 |
| C                         | -3.505141 | -0.284969 | 0.961777  |
| C                         | -2.228451 | 0.394169  | 0.876816  |
| C                         | -0.456753 | 1.813021  | 1.808159  |
| C                         | 0.128161  | 2.557507  | 2.899528  |
| C                         | 1.436407  | 2.800377  | 2.564603  |
| C                         | 1.648596  | 2.243568  | 1.251200  |
| C                         | 2.977606  | 1.943238  | -0.784177 |
| C                         | 4.146712  | 2.197434  | -1.594805 |
| C                         | 3.896094  | 1.675530  | -2.831978 |
| C                         | 2.581064  | 1.076239  | -2.784609 |
| C                         | 2.009552  | 0.355636  | -3.820445 |
| H                         | 2.563330  | 0.289179  | -4.750756 |
| C                         | -2.123802 | -1.528386 | -2.114022 |
| H                         | -2.863282 | -2.227755 | -2.489653 |
| C                         | -1.732036 | 1.268467  | 1.828179  |
| H                         | -2.357768 | 1.487609  | 2.686780  |
| C                         | 2.819374  | 2.372375  | 0.521809  |
| H                         | 3.651327  | 2.887706  | 0.988590  |
| C                         | 2.096664  | 4.860895  | -1.517535 |
| C                         | 1.153981  | 4.911268  | -0.458646 |
| C                         | -0.134229 | 4.419098  | -0.679964 |
| C                         | -0.486218 | 3.824483  | -1.927284 |
| C                         | 0.491914  | 3.837332  | -2.985196 |
| C                         | 1.764971  | 4.321813  | -2.773366 |
| C                         | 1.589066  | 5.539390  | 0.778056  |
| C                         | 2.836619  | 6.073839  | 0.902125  |
| C                         | 3.813602  | 6.004393  | -0.154439 |
| O                         | 3.368850  | 5.363927  | -1.371675 |
| O                         | 0.730444  | 5.646396  | 1.846790  |
| O                         | 4.978348  | 6.394785  | -0.133490 |
| H                         | -0.892847 | 4.499514  | 0.090693  |
| H                         | -1.534937 | 3.797543  | -2.195530 |
| H                         | 0.215387  | 3.417092  | -3.944340 |
| H                         | 2.526441  | 4.302415  | -3.541969 |
| H                         | 0.142277  | 4.865383  | 1.932441  |
| H                         | 0.742278  | -1.360360 | -5.729180 |
| H                         | -1.522253 | -2.480530 | -4.734797 |
| H                         | -4.392506 | -1.777743 | -0.401356 |
| H                         | -4.219394 | -0.145183 | 1.761086  |
| H                         | -0.387348 | 2.806041  | 3.816877  |
| H                         | 2.190044  | 3.323827  | 3.134387  |
| H                         | 5.019039  | 2.735431  | -1.253779 |
| H                         | 4.535705  | 1.673660  | -3.703230 |
| H                         | 3.140098  | 6.541007  | 1.828463  |
| *                         |           |           |           |
| Diclofenac C4' RC Quartet |           |           |           |
| H                         | 0.167354  | -0.853409 | 2.682073  |
| S                         | 0.091414  | 0.452360  | 2.236966  |

|    |           |           |           |
|----|-----------|-----------|-----------|
| O  | 0.056626  | -0.566796 | -1.813571 |
| Fe | -0.029106 | -0.151339 | -0.215473 |
| N  | -0.835569 | -1.920361 | 0.302760  |
| N  | -1.865575 | 0.637282  | -0.401769 |
| N  | 0.775774  | 1.672918  | -0.487660 |
| N  | 1.791065  | -0.862408 | 0.276743  |
| C  | -0.161192 | -3.090784 | 0.601546  |
| C  | -1.100157 | -4.174126 | 0.787348  |
| C  | -2.350486 | -3.652231 | 0.605734  |
| C  | -2.181032 | -2.249426 | 0.300739  |
| C  | -3.071247 | -0.031034 | -0.288678 |
| C  | -4.168004 | 0.866605  | -0.577346 |
| C  | -3.618423 | 2.082687  | -0.870366 |
| C  | -2.184074 | 1.932380  | -0.758178 |
| C  | 0.104030  | 2.832914  | -0.846821 |
| C  | 1.048239  | 3.906260  | -1.066836 |
| C  | 2.293659  | 3.393765  | -0.841230 |
| C  | 2.119034  | 2.005166  | -0.477078 |
| C  | 3.000657  | -0.176070 | 0.224555  |
| C  | 4.088353  | -1.059255 | 0.567733  |
| C  | 3.547008  | -2.289897 | 0.807114  |
| C  | 2.119798  | -2.171255 | 0.619166  |
| C  | 1.215313  | -3.208046 | 0.745943  |
| H  | 1.610265  | -4.187921 | 0.992236  |
| C  | -3.219101 | -1.369238 | 0.040946  |
| H  | -4.229583 | -1.762838 | 0.086765  |
| C  | -1.268206 | 2.953989  | -0.970390 |
| H  | -1.660859 | 3.925264  | -1.252550 |
| C  | 3.154681  | 1.144599  | -0.148303 |
| H  | 4.165134  | 1.535204  | -0.189749 |
| C  | 4.977062  | -2.813049 | -2.996549 |
| C  | 4.307087  | -1.580065 | -2.835403 |
| C  | 2.926504  | -1.478574 | -2.706925 |
| C  | 2.147358  | -2.641016 | -2.748745 |
| C  | 2.759632  | -3.885904 | -2.923512 |
| C  | 4.146627  | -3.951930 | -3.035438 |
| Cl | 5.277649  | -0.030489 | -2.831481 |
| H  | 2.448065  | -0.516524 | -2.582193 |
| H  | 1.073365  | -2.547481 | -2.641579 |
| H  | 2.173310  | -4.796119 | -2.963547 |
| Cl | 4.920516  | -5.597967 | -3.232678 |
| C  | 9.104076  | -1.684896 | -0.153510 |
| C  | 9.492848  | -1.735536 | -1.496925 |
| C  | 8.590960  | -2.116487 | -2.499937 |
| C  | 7.273430  | -2.483124 | -2.143358 |
| C  | 6.884999  | -2.432364 | -0.793025 |
| C  | 7.789430  | -2.028838 | 0.191237  |
| H  | 9.812439  | -1.378300 | 0.609040  |
| H  | 10.503007 | -1.455758 | -1.783125 |
| N  | 6.369304  | -2.902197 | -3.142142 |
| H  | 5.873735  | -2.717002 | -0.531595 |
| H  | 7.472913  | -2.000482 | 1.230325  |
| H  | 6.733156  | -3.572953 | -3.816217 |
| C  | 9.005141  | -2.075254 | -3.962322 |
| H  | 9.907662  | -1.473430 | -4.084857 |
| H  | 8.185127  | -1.629906 | -4.543473 |
| C  | 9.245459  | -3.455851 | -4.520079 |
| O  | 8.378250  | -4.331035 | -4.661813 |
| O  | 10.559492 | -3.680610 | -4.848334 |
| H  | -0.821306 | -5.188939 | 1.032779  |

|                           |           |           |           |
|---------------------------|-----------|-----------|-----------|
| H                         | -3.306137 | -4.153104 | 0.668081  |
| H                         | -5.211001 | 0.584072  | -0.555390 |
| H                         | -4.117632 | 3.003306  | -1.136851 |
| H                         | 0.773696  | 4.911021  | -1.354344 |
| H                         | 3.251006  | 3.890813  | -0.905015 |
| H                         | 5.126861  | -0.764261 | 0.579239  |
| H                         | 4.051577  | -3.207478 | 1.074409  |
| H                         | 10.681290 | -4.596414 | -5.184869 |
| *                         |           |           |           |
| Diclofenac C4' RC Doublet |           |           |           |
| H                         | 0.162323  | -0.854225 | 2.689111  |
| S                         | 0.087871  | 0.454001  | 2.250616  |
| O                         | 0.092757  | -0.564809 | -1.813406 |
| Fe                        | -0.039874 | -0.146962 | -0.221631 |
| N                         | -0.847486 | -1.915387 | 0.296951  |
| N                         | -1.871897 | 0.643716  | -0.404856 |
| N                         | 0.770314  | 1.677122  | -0.483890 |
| N                         | 1.783653  | -0.859433 | 0.282706  |
| C                         | -0.173879 | -3.085048 | 0.600713  |
| C                         | -1.113645 | -4.168364 | 0.782536  |
| C                         | -2.363360 | -3.647365 | 0.592582  |
| C                         | -2.192525 | -2.244863 | 0.287442  |
| C                         | -3.079192 | -0.023003 | -0.293090 |
| C                         | -4.174492 | 0.880398  | -0.567562 |
| C                         | -3.622915 | 2.098157  | -0.851005 |
| C                         | -2.188662 | 1.943041  | -0.747986 |
| C                         | 0.101090  | 2.838640  | -0.842155 |
| C                         | 1.047886  | 3.908886  | -1.066484 |
| C                         | 2.292418  | 3.392153  | -0.845932 |
| C                         | 2.114953  | 2.004408  | -0.479156 |
| C                         | 2.994703  | -0.177558 | 0.223208  |
| C                         | 4.081609  | -1.064560 | 0.560704  |
| C                         | 3.537120  | -2.292831 | 0.804748  |
| C                         | 2.109211  | -2.169303 | 0.622889  |
| C                         | 1.202026  | -3.203570 | 0.750440  |
| H                         | 1.594470  | -4.184105 | 0.998161  |
| C                         | -3.229251 | -1.363137 | 0.026984  |
| H                         | -4.240243 | -1.755790 | 0.069340  |
| C                         | -1.271262 | 2.963506  | -0.959578 |
| H                         | -1.662977 | 3.936818  | -1.235936 |
| C                         | 3.150004  | 1.142829  | -0.151039 |
| H                         | 4.160996  | 1.531518  | -0.196826 |
| C                         | 4.986819  | -2.826844 | -2.999871 |
| C                         | 4.311530  | -1.597198 | -2.835050 |
| C                         | 2.932283  | -1.504256 | -2.693877 |
| C                         | 2.158784  | -2.671236 | -2.730283 |
| C                         | 2.775889  | -3.912536 | -2.913146 |
| C                         | 4.162412  | -3.970131 | -3.035306 |
| Cl                        | 5.272924  | -0.042000 | -2.838022 |
| H                         | 2.442236  | -0.548904 | -2.562479 |
| H                         | 1.086081  | -2.580732 | -2.608008 |
| H                         | 2.194970  | -4.826384 | -2.949819 |
| Cl                        | 4.944732  | -5.611592 | -3.239391 |
| C                         | 9.106173  | -1.673754 | -0.159235 |
| C                         | 9.496524  | -1.725915 | -1.502084 |
| C                         | 8.597435  | -2.112819 | -2.505306 |
| C                         | 7.281118  | -2.484309 | -2.149252 |
| C                         | 6.891177  | -2.432147 | -0.799108 |
| C                         | 7.792656  | -2.022462 | 0.185170  |
| H                         | 9.812504  | -1.362142 | 0.603161  |



|   |           |           |           |
|---|-----------|-----------|-----------|
| H | 10.505645 | -1.442066 | -1.787917 |
| N | 6.379252  | -2.908244 | -3.148215 |
| H | 5.879992  | -2.719852 | -0.540100 |
| H | 7.474838  | -1.993398 | 1.223828  |
| H | 6.746083  | -3.578551 | -3.821070 |
| C | 9.012405  | -2.071124 | -3.967497 |
| H | 9.913141  | -1.466578 | -4.089745 |
| H | 8.191342  | -1.628652 | -4.549368 |
| C | 9.257434  | -3.451246 | -4.524429 |
| O | 8.392128  | -4.327548 | -4.670790 |
| O | 10.572681 | -3.672767 | -4.849955 |
| H | -0.835917 | -5.182616 | 1.031550  |
| H | -3.319111 | -4.148539 | 0.650718  |
| H | -5.218249 | 0.600979  | -0.542310 |
| H | -4.121149 | 3.022766  | -1.105170 |
| H | 0.775574  | 4.914356  | -1.353580 |
| H | 3.251156  | 3.885924  | -0.914072 |
| H | 5.120771  | -0.771888 | 0.569762  |
| H | 4.039618  | -3.211727 | 1.071235  |
| H | 10.697122 | -4.587916 | -5.187317 |

\*

Diclofenac C4' TS Quartet

|    |           |           |           |
|----|-----------|-----------|-----------|
| H  | -1.392868 | -0.398107 | 1.811586  |
| S  | -0.077933 | -0.548615 | 2.206391  |
| O  | 1.477482  | -0.512119 | -1.609739 |
| Fe | 0.864023  | -0.445822 | -0.020806 |
| N  | 0.126969  | -2.334582 | -0.156266 |
| N  | -0.906256 | 0.262372  | -0.681734 |
| N  | 1.536885  | 1.414490  | 0.210295  |
| N  | 2.540282  | -1.158465 | 0.808966  |
| C  | 0.765913  | -3.499219 | 0.231283  |
| C  | -0.062145 | -4.642867 | -0.077029 |
| C  | -1.205128 | -4.164782 | -0.656814 |
| C  | -1.086722 | -2.723074 | -0.696663 |
| C  | -1.979435 | -0.477908 | -1.159888 |
| C  | -3.019463 | 0.411023  | -1.628281 |
| C  | -2.570452 | 1.687968  | -1.436727 |
| C  | -1.248659 | 1.589004  | -0.859141 |
| C  | 0.860588  | 2.588483  | -0.088734 |
| C  | 1.709550  | 3.730599  | 0.180014  |
| C  | 2.896642  | 3.245553  | 0.645601  |
| C  | 2.783079  | 1.801937  | 0.672043  |
| C  | 3.653548  | -0.432766 | 1.194921  |
| C  | 4.687302  | -1.324811 | 1.671391  |
| C  | 4.193751  | -2.594030 | 1.576618  |
| C  | 2.855161  | -2.490543 | 1.039988  |
| C  | 2.032773  | -3.572177 | 0.784992  |
| H  | 2.421939  | -4.557701 | 1.012035  |
| C  | -2.059425 | -1.861271 | -1.180261 |
| H  | -2.964879 | -2.303665 | -1.582431 |
| C  | -0.431972 | 2.673804  | -0.570563 |
| H  | -0.832304 | 3.664562  | -0.758451 |
| C  | 3.771021  | 0.946487  | 1.128151  |
| H  | 4.699369  | 1.387740  | 1.474471  |
| C  | 3.960152  | -2.491172 | -3.221669 |
| C  | 3.540625  | -1.315951 | -3.904658 |
| C  | 2.223649  | -0.917826 | -3.957578 |
| C  | 1.245229  | -1.670712 | -3.254229 |
| C  | 1.586416  | -2.969063 | -2.795468 |
| C  | 2.917531  | -3.335544 | -2.766822 |

|    |           |           |           |
|----|-----------|-----------|-----------|
| Cl | 4.771472  | -0.297136 | -4.790100 |
| H  | 1.949178  | 0.003862  | -4.453005 |
| H  | 0.200196  | -1.400137 | -3.331467 |
| H  | 0.825813  | -3.633919 | -2.411376 |
| Cl | 3.363663  | -4.972912 | -2.079127 |
| C  | 7.964403  | -0.046428 | -1.190513 |
| C  | 8.449092  | -1.069071 | -2.014076 |
| C  | 7.575289  | -1.968339 | -2.639663 |
| C  | 6.187390  | -1.851302 | -2.409381 |
| C  | 5.698961  | -0.825779 | -1.579469 |
| C  | 6.583263  | 0.072975  | -0.983433 |
| H  | 8.654102  | 0.650285  | -0.724944 |
| H  | 9.516266  | -1.163533 | -2.197157 |
| N  | 5.299098  | -2.785273 | -3.001004 |
| H  | 4.631627  | -0.745882 | -1.400281 |
| H  | 6.185802  | 0.858942  | -0.349245 |
| H  | 5.570675  | -3.763376 | -2.909143 |
| C  | 8.113581  | -3.018951 | -3.597791 |
| H  | 9.128968  | -2.766698 | -3.908369 |
| H  | 7.463230  | -3.054055 | -4.483567 |
| C  | 8.106040  | -4.398486 | -2.986555 |
| O  | 7.092156  | -5.009014 | -2.613822 |
| O  | 9.361312  | -4.937146 | -2.859626 |
| H  | 0.215910  | -5.667411 | 0.123558  |
| H  | -2.060615 | -4.717773 | -1.018150 |
| H  | -3.962254 | 0.082672  | -2.042307 |
| H  | -3.068248 | 2.619263  | -1.666379 |
| H  | 1.413563  | 4.758625  | 0.025734  |
| H  | 3.774869  | 3.793507  | 0.956367  |
| H  | 5.660991  | -1.002790 | 2.009768  |
| H  | 4.677064  | -3.526696 | 1.828671  |
| H  | 9.317657  | -5.828420 | -2.446696 |

\*

Diclofenac C4' TS Doublet

|    |           |           |           |
|----|-----------|-----------|-----------|
| H  | 0.146133  | -1.487677 | 2.550866  |
| S  | -0.107179 | -0.196470 | 2.130900  |
| O  | 1.807866  | -0.592801 | -1.469945 |
| Fe | 0.899042  | -0.475249 | -0.012070 |
| N  | 0.197979  | -2.340396 | -0.099432 |
| N  | -0.763141 | 0.197262  | -0.901906 |
| N  | 1.554909  | 1.422027  | 0.195666  |
| N  | 2.550064  | -1.140743 | 0.946577  |
| C  | 0.875211  | -3.499098 | 0.259824  |
| C  | 0.052738  | -4.651008 | -0.018218 |
| C  | -1.127823 | -4.189490 | -0.535204 |
| C  | -1.032392 | -2.749882 | -0.592032 |
| C  | -1.868562 | -0.549763 | -1.281018 |
| C  | -2.855964 | 0.310149  | -1.894065 |
| C  | -2.344845 | 1.577660  | -1.882922 |
| C  | -1.045141 | 1.507387  | -1.252901 |
| C  | 0.960786  | 2.562420  | -0.310842 |
| C  | 1.765873  | 3.721970  | 0.012498  |
| C  | 2.842967  | 3.274218  | 0.721912  |
| C  | 2.712718  | 1.835306  | 0.827932  |
| C  | 3.580495  | -0.373689 | 1.457323  |
| C  | 4.618931  | -1.235439 | 1.983736  |
| C  | 4.215062  | -2.522650 | 1.775525  |
| C  | 2.918586  | -2.460489 | 1.134770  |
| C  | 2.145637  | -3.560535 | 0.808088  |
| H  | 2.555301  | -4.543254 | 1.011149  |

|    |           |           |           |
|----|-----------|-----------|-----------|
| C  | -2.002024 | -1.918993 | -1.130796 |
| H  | -2.919959 | -2.378111 | -1.481430 |
| C  | -0.239190 | 2.605497  | -0.999768 |
| H  | -0.592663 | 3.574608  | -1.334669 |
| C  | 3.647983  | 1.009132  | 1.428251  |
| H  | 4.514224  | 1.478538  | 1.882598  |
| C  | 3.828242  | -2.436584 | -3.304451 |
| C  | 3.451575  | -1.201867 | -3.914094 |
| C  | 2.165402  | -0.726802 | -3.872467 |
| C  | 1.191060  | -1.458345 | -3.119731 |
| C  | 1.459232  | -2.832574 | -2.819616 |
| C  | 2.755384  | -3.279169 | -2.899485 |
| Cl | 4.710291  | -0.210081 | -4.786627 |
| H  | 1.916120  | 0.237435  | -4.294323 |
| H  | 0.166038  | -1.110615 | -3.095008 |
| H  | 0.677068  | -3.474120 | -2.439032 |
| Cl | 3.144863  | -4.979286 | -2.354615 |
| C  | 7.786013  | -0.144002 | -1.063662 |
| C  | 8.283534  | -1.095938 | -1.961359 |
| C  | 7.419094  | -1.954856 | -2.653344 |
| C  | 6.032610  | -1.862328 | -2.416805 |
| C  | 5.527669  | -0.911765 | -1.511272 |
| C  | 6.404299  | -0.053419 | -0.846263 |
| H  | 8.468988  | 0.520931  | -0.544532 |
| H  | 9.352083  | -1.166551 | -2.146901 |
| N  | 5.146124  | -2.767586 | -3.070036 |
| H  | 4.457716  | -0.854132 | -1.328041 |
| H  | 5.999012  | 0.673138  | -0.149879 |
| H  | 5.400762  | -3.752531 | -2.991795 |
| C  | 7.967038  | -2.938683 | -3.674320 |
| H  | 8.983899  | -2.665180 | -3.961026 |
| H  | 7.325032  | -2.917696 | -4.566681 |
| C  | 7.958899  | -4.356180 | -3.154933 |
| O  | 6.949652  | -4.977168 | -2.786267 |
| O  | 9.208586  | -4.918151 | -3.110086 |
| H  | 0.355881  | -5.671809 | 0.164424  |
| H  | -1.988857 | -4.756467 | -0.859752 |
| H  | -3.809009 | -0.029897 | -2.273286 |
| H  | -2.795539 | 2.489441  | -2.248285 |
| H  | 1.517288  | 4.734727  | -0.271376 |
| H  | 3.661909  | 3.843816  | 1.137883  |
| H  | 5.536065  | -0.880196 | 2.430923  |
| H  | 4.728102  | -3.440240 | 2.024864  |
| H  | 9.167000  | -5.834876 | -2.756883 |

\*

Diclofenac C5 RC Doublet

|    |           |           |           |
|----|-----------|-----------|-----------|
| H  | -0.427618 | 0.332529  | 2.501710  |
| S  | -0.086952 | 0.902202  | 1.290281  |
| O  | 0.099735  | -2.776150 | -0.704800 |
| Fe | -0.086708 | -1.301554 | 0.013984  |
| N  | -1.411588 | -2.003657 | 1.353584  |
| N  | -1.591210 | -0.727037 | -1.180298 |
| N  | 1.221920  | -0.346756 | -1.184352 |
| N  | 1.401086  | -1.619459 | 1.341169  |
| C  | -1.130814 | -2.640304 | 2.548267  |
| C  | -2.352834 | -3.104326 | 3.165899  |
| C  | -3.378476 | -2.744996 | 2.336808  |
| C  | -2.786828 | -2.066270 | 1.205780  |
| C  | -2.941191 | -0.961853 | -0.988867 |
| C  | -3.697146 | -0.484107 | -2.125775 |

|                          |           |           |           |
|--------------------------|-----------|-----------|-----------|
| C                        | -2.795810 | 0.037585  | -3.009984 |
| C                        | -1.487071 | -0.113240 | -2.412951 |
| C                        | 0.949291  | 0.233085  | -2.415436 |
| C                        | 2.169280  | 0.733997  | -3.009472 |
| C                        | 3.182756  | 0.450226  | -2.139802 |
| C                        | 2.588865  | -0.221409 | -1.005565 |
| C                        | 2.750620  | -1.338722 | 1.171869  |
| C                        | 3.509015  | -1.858941 | 2.285763  |
| C                        | 2.622457  | -2.465051 | 3.129232  |
| C                        | 1.309747  | -2.320493 | 2.541061  |
| C                        | 0.137035  | -2.798889 | 3.094084  |
| H                        | 0.209486  | -3.327807 | 4.038475  |
| C                        | -3.498105 | -1.573514 | 0.123233  |
| H                        | -4.576907 | -1.692277 | 0.139463  |
| C                        | -0.304926 | 0.328695  | -2.991601 |
| H                        | -0.372589 | 0.800056  | -3.966225 |
| C                        | 3.302395  | -0.690890 | 0.083823  |
| H                        | 4.378474  | -0.566790 | 0.067853  |
| C                        | 7.476692  | -2.442353 | -3.360445 |
| C                        | 7.929266  | -1.553267 | -2.356997 |
| C                        | 9.275305  | -1.376253 | -2.048033 |
| C                        | 10.250948 | -2.065941 | -2.774931 |
| C                        | 9.860958  | -2.924459 | -3.808683 |
| C                        | 8.507519  | -3.102150 | -4.073333 |
| C1                       | 6.737839  | -0.498685 | -1.460033 |
| H                        | 9.554242  | -0.682735 | -1.263597 |
| H                        | 11.301682 | -1.927310 | -2.546526 |
| H                        | 10.596159 | -3.463427 | -4.393548 |
| C1                       | 8.054679  | -4.266003 | -5.412972 |
| C                        | 3.051509  | -3.762027 | -1.010353 |
| C                        | 2.750539  | -3.189949 | -2.249403 |
| C                        | 3.764931  | -2.782775 | -3.126451 |
| C                        | 5.114757  | -2.980453 | -2.757741 |
| C                        | 5.416950  | -3.556281 | -1.512115 |
| C                        | 4.391516  | -3.936375 | -0.642564 |
| H                        | 2.239162  | -4.020705 | -0.342431 |
| H                        | 1.711516  | -3.014887 | -2.506685 |
| N                        | 6.137112  | -2.634885 | -3.681562 |
| H                        | 6.455949  | -3.709153 | -1.238990 |
| H                        | 4.640610  | -4.367584 | 0.322192  |
| H                        | 5.935370  | -2.910489 | -4.640138 |
| C                        | 3.395233  | -2.097415 | -4.433303 |
| H                        | 4.126390  | -1.307350 | -4.647731 |
| H                        | 2.404250  | -1.650113 | -4.343332 |
| C                        | 3.360075  | -3.047133 | -5.603780 |
| O                        | 4.644722  | -3.487523 | -5.925748 |
| O                        | 2.374613  | -3.427589 | -6.231539 |
| H                        | -2.399884 | -3.628932 | 4.109407  |
| H                        | -4.438151 | -2.919979 | 2.459349  |
| H                        | -4.772365 | -0.550436 | -2.216936 |
| H                        | -2.979223 | 0.489105  | -3.974351 |
| H                        | 2.221503  | 1.231549  | -3.967453 |
| H                        | 4.238846  | 0.650798  | -2.241234 |
| H                        | 4.581295  | -1.766111 | 2.384217  |
| H                        | 2.817875  | -2.966331 | 4.066422  |
| H                        | 4.633042  | -4.147274 | -6.650853 |
| *                        |           |           |           |
| Diclofenac C5 RC Quartet |           |           |           |
| H                        | -0.371341 | 0.359774  | 2.479953  |
| S                        | -0.115502 | 0.912567  | 1.239767  |

|    |           |           |           |
|----|-----------|-----------|-----------|
| O  | 0.085877  | -2.775352 | -0.721417 |
| Fe | -0.072182 | -1.307561 | 0.022199  |
| N  | -1.400045 | -2.012653 | 1.354788  |
| N  | -1.576763 | -0.742869 | -1.184593 |
| N  | 1.238120  | -0.353436 | -1.177168 |
| N  | 1.408763  | -1.623268 | 1.348920  |
| C  | -1.124273 | -2.639951 | 2.555826  |
| C  | -2.348004 | -3.104039 | 3.169872  |
| C  | -3.369999 | -2.753827 | 2.332638  |
| C  | -2.774565 | -2.080289 | 1.200378  |
| C  | -2.925546 | -0.987245 | -1.000612 |
| C  | -3.678322 | -0.519299 | -2.144230 |
| C  | -2.775790 | 0.007758  | -3.023643 |
| C  | -1.469422 | -0.130406 | -2.417106 |
| C  | 0.965011  | 0.234535  | -2.404462 |
| C  | 2.183152  | 0.750122  | -2.989709 |
| C  | 3.196418  | 0.464576  | -2.120416 |
| C  | 2.603680  | -0.219912 | -0.993441 |
| C  | 2.757939  | -1.336292 | 1.185019  |
| C  | 3.512710  | -1.840954 | 2.308350  |
| C  | 2.624141  | -2.441017 | 3.154152  |
| C  | 1.314592  | -2.309315 | 2.556789  |
| C  | 0.141151  | -2.788033 | 3.109172  |
| H  | 0.211540  | -3.306762 | 4.059320  |
| C  | -3.483438 | -1.596504 | 0.112097  |
| H  | -4.561620 | -1.721093 | 0.124769  |
| C  | -0.287315 | 0.323547  | -2.986185 |
| H  | -0.353274 | 0.799844  | -3.958564 |
| C  | 3.313669  | -0.689941 | 0.097496  |
| H  | 4.389447  | -0.561498 | 0.087268  |
| C  | 7.464754  | -2.440796 | -3.358677 |
| C  | 7.921505  | -1.561023 | -2.348744 |
| C  | 9.268504  | -1.392591 | -2.038495 |
| C  | 10.241105 | -2.081568 | -2.769847 |
| C  | 9.847170  | -2.930284 | -3.810249 |
| C  | 8.493114  | -3.099368 | -4.076657 |
| Cl | 6.737024  | -0.502516 | -1.446966 |
| H  | 9.550272  | -0.705581 | -1.249372 |
| H  | 11.292461 | -1.949457 | -2.540399 |
| H  | 10.579887 | -3.468275 | -4.399149 |
| Cl | 8.036012  | -4.251621 | -5.425033 |
| C  | 3.029614  | -3.759227 | -1.025367 |
| C  | 2.732824  | -3.179606 | -2.261805 |
| C  | 3.750870  | -2.772942 | -3.135078 |
| C  | 5.099313  | -2.975799 | -2.764313 |
| C  | 5.396828  | -3.560479 | -1.521586 |
| C  | 4.368373  | -3.941867 | -0.656567 |
| H  | 2.217542  | -4.019882 | -0.358146 |
| H  | 1.695173  | -2.998479 | -2.520697 |
| N  | 6.124825  | -2.626156 | -3.682715 |
| H  | 6.434763  | -3.718199 | -1.247335 |
| H  | 4.613574  | -4.379787 | 0.306191  |
| H  | 5.924142  | -2.892041 | -4.644315 |
| C  | 3.385437  | -2.084864 | -4.442008 |
| H  | 4.121071  | -1.299376 | -4.656804 |
| H  | 2.397023  | -1.632169 | -4.351216 |
| C  | 3.343596  | -3.037215 | -5.610101 |
| O  | 4.627319  | -3.473193 | -5.941688 |
| O  | 2.354075  | -3.425320 | -6.226631 |
| H  | -2.398689 | -3.622572 | 4.116532  |

|   |           |           |           |
|---|-----------|-----------|-----------|
| H | -4.429697 | -2.931800 | 2.450401  |
| H | -4.752272 | -0.595089 | -2.242400 |
| H | -2.956580 | 0.455491  | -3.990243 |
| H | 2.234856  | 1.256975  | -3.942843 |
| H | 4.251077  | 0.673828  | -2.217579 |
| H | 4.583779  | -1.740876 | 2.412647  |
| H | 2.816521  | -2.929916 | 4.098432  |
| H | 4.612848  | -4.136566 | -6.663398 |

\*

Diclofenac C5 TS Quartet

|    |           |           |           |
|----|-----------|-----------|-----------|
| H  | 0.483217  | 0.120127  | 2.299811  |
| S  | 0.363517  | 0.739612  | 1.070898  |
| O  | 0.524132  | -2.747870 | -1.107317 |
| Fe | 0.403030  | -1.284710 | -0.181182 |
| N  | -0.578441 | -2.218307 | 1.280724  |
| N  | -1.317851 | -0.822940 | -1.071519 |
| N  | 1.403932  | -0.221922 | -1.575295 |
| N  | 2.150313  | -1.655881 | 0.772059  |
| C  | -0.027046 | -2.980791 | 2.300862  |
| C  | -1.083416 | -3.548191 | 3.111291  |
| C  | -2.268468 | -3.118363 | 2.585178  |
| C  | -1.951151 | -2.301694 | 1.433187  |
| C  | -2.590671 | -1.093875 | -0.604992 |
| C  | -3.574691 | -0.635801 | -1.564036 |
| C  | -2.888956 | -0.100034 | -2.616209 |
| C  | -1.478753 | -0.204891 | -2.301935 |
| C  | 0.879714  | 0.328802  | -2.726593 |
| C  | 1.922826  | 1.004505  | -3.467128 |
| C  | 3.077442  | 0.868094  | -2.745640 |
| C  | 2.751060  | 0.090348  | -1.570301 |
| C  | 3.393909  | -1.145255 | 0.452469  |
| C  | 4.389843  | -1.680325 | 1.354614  |
| C  | 3.741361  | -2.528806 | 2.208870  |
| C  | 2.338596  | -2.495366 | 1.852180  |
| C  | 1.325855  | -3.139435 | 2.549843  |
| H  | 1.611799  | -3.764583 | 3.389476  |
| C  | -2.890974 | -1.754526 | 0.574698  |
| H  | -3.938423 | -1.900979 | 0.816917  |
| C  | -0.461001 | 0.306414  | -3.087406 |
| H  | -0.738263 | 0.780320  | -4.023106 |
| C  | 3.673838  | -0.317445 | -0.620607 |
| H  | 4.699674  | 0.003058  | -0.753387 |
| C  | 6.670535  | -2.392618 | -2.388087 |
| C  | 7.434524  | -1.261952 | -2.025463 |
| C  | 8.639561  | -1.346252 | -1.335538 |
| C  | 9.130551  | -2.606418 | -0.975453 |
| C  | 8.434650  | -3.759075 | -1.353981 |
| C  | 7.244304  | -3.644756 | -2.070220 |
| Cl | 6.841929  | 0.399518  | -2.502710 |
| H  | 9.177778  | -0.442093 | -1.079361 |
| H  | 10.060446 | -2.689604 | -0.424683 |
| H  | 8.824400  | -4.743106 | -1.124045 |
| Cl | 6.492118  | -5.180354 | -2.688670 |
| C  | 1.717949  | -3.915966 | -1.963248 |
| C  | 1.908335  | -3.264045 | -3.229173 |
| C  | 3.109294  | -2.679977 | -3.583746 |
| C  | 4.229958  | -2.799130 | -2.703594 |
| C  | 4.070863  | -3.469744 | -1.464703 |
| C  | 2.866700  | -4.037335 | -1.111189 |
| H  | 0.936583  | -4.664164 | -1.887289 |

|   |           |           |           |
|---|-----------|-----------|-----------|
| H | 1.060311  | -3.185894 | -3.900039 |
| N | 5.453724  | -2.244746 | -3.070891 |
| H | 4.910411  | -3.528007 | -0.784797 |
| H | 2.764639  | -4.541467 | -0.158143 |
| H | 5.480952  | -1.648464 | -3.889368 |
| C | 3.203532  | -1.900311 | -4.888096 |
| H | 3.546399  | -0.878358 | -4.695748 |
| H | 2.201124  | -1.835712 | -5.320806 |
| C | 4.098685  | -2.553918 | -5.915705 |
| O | 5.339580  | -1.920206 | -5.975330 |
| O | 3.829623  | -3.521601 | -6.622674 |
| H | -0.917759 | -4.179760 | 3.972883  |
| H | -3.272880 | -3.333837 | 2.921164  |
| H | -4.643699 | -0.730138 | -1.432685 |
| H | -3.280132 | 0.343563  | -3.521048 |
| H | 1.768981  | 1.525821  | -4.401683 |
| H | 4.064542  | 1.245101  | -2.968670 |
| H | 5.441802  | -1.433616 | 1.315211  |
| H | 4.150983  | -3.109818 | 3.023463  |
| H | 5.931573  | -2.369855 | -6.617305 |

\*

Diclofenac C5 TS Doublet

|    |           |           |           |
|----|-----------|-----------|-----------|
| H  | -0.140690 | 0.177725  | 2.195137  |
| S  | 0.272386  | 0.755602  | 1.011578  |
| O  | 0.401646  | -2.768414 | -1.087797 |
| Fe | 0.477679  | -1.298006 | -0.221644 |
| N  | -0.526690 | -2.211611 | 1.271375  |
| N  | -1.280848 | -0.830176 | -1.104515 |
| N  | 1.450053  | -0.231850 | -1.592808 |
| N  | 2.200110  | -1.674597 | 0.713720  |
| C  | 0.023221  | -2.977175 | 2.283220  |
| C  | -1.030726 | -3.555229 | 3.089596  |
| C  | -2.216934 | -3.134115 | 2.558099  |
| C  | -1.899902 | -2.311754 | 1.409460  |
| C  | -2.548011 | -1.121301 | -0.640055 |
| C  | -3.538526 | -0.670784 | -1.598888 |
| C  | -2.858331 | -0.119693 | -2.646085 |
| C  | -1.446477 | -0.211111 | -2.326867 |
| C  | 0.910604  | 0.342828  | -2.733031 |
| C  | 1.940507  | 1.054440  | -3.454342 |
| C  | 3.097818  | 0.926210  | -2.735414 |
| C  | 2.790140  | 0.113987  | -1.581160 |
| C  | 3.442215  | -1.148537 | 0.414277  |
| C  | 4.434736  | -1.678300 | 1.321723  |
| C  | 3.786317  | -2.533368 | 2.168668  |
| C  | 2.385689  | -2.507621 | 1.805970  |
| C  | 1.379858  | -3.141429 | 2.517309  |
| H  | 1.673158  | -3.763863 | 3.356435  |
| C  | -2.841128 | -1.782398 | 0.540801  |
| H  | -3.887503 | -1.943844 | 0.778756  |
| C  | -0.425950 | 0.315202  | -3.100959 |
| H  | -0.699778 | 0.801847  | -4.031154 |
| C  | 3.718950  | -0.296107 | -0.638863 |
| H  | 4.738568  | 0.047323  | -0.757056 |
| C  | 6.668936  | -2.416187 | -2.344395 |
| C  | 7.414776  | -1.269809 | -1.996105 |
| C  | 8.600451  | -1.325415 | -1.270047 |
| C  | 9.090084  | -2.571348 | -0.862267 |
| C  | 8.416001  | -3.740129 | -1.230263 |
| C  | 7.244825  | -3.654279 | -1.981576 |

|    |           |           |           |
|----|-----------|-----------|-----------|
| Cl | 6.831726  | 0.370275  | -2.548515 |
| H  | 9.125661  | -0.410568 | -1.025168 |
| H  | 10.004817 | -2.631715 | -0.283641 |
| H  | 8.808110  | -4.714123 | -0.964760 |
| Cl | 6.523448  | -5.211138 | -2.583432 |
| C  | 1.733595  | -3.972111 | -1.997165 |
| C  | 1.907460  | -3.262316 | -3.220808 |
| C  | 3.110292  | -2.666003 | -3.561015 |
| C  | 4.232992  | -2.821289 | -2.689956 |
| C  | 4.063346  | -3.500584 | -1.458028 |
| C  | 2.854844  | -4.078508 | -1.125414 |
| H  | 0.912272  | -4.668778 | -1.901215 |
| H  | 1.057785  | -3.157786 | -3.885974 |
| N  | 5.465351  | -2.295461 | -3.059925 |
| H  | 4.894352  | -3.562789 | -0.768805 |
| H  | 2.747736  | -4.599056 | -0.181708 |
| H  | 5.520249  | -1.775934 | -3.928654 |
| C  | 3.193065  | -1.832472 | -4.833459 |
| H  | 3.626214  | -0.850814 | -4.616796 |
| H  | 2.177636  | -1.670576 | -5.203604 |
| C  | 3.977753  | -2.502782 | -5.936148 |
| O  | 5.303873  | -2.068994 | -5.938896 |
| O  | 3.566640  | -3.334781 | -6.740605 |
| H  | -0.863833 | -4.189670 | 3.948811  |
| H  | -3.221341 | -3.360981 | 2.886566  |
| H  | -4.606395 | -0.779131 | -1.468944 |
| H  | -3.252819 | 0.325261  | -3.548770 |
| H  | 1.775790  | 1.595196  | -4.375919 |
| H  | 4.076226  | 1.329965  | -2.949137 |
| H  | 5.484422  | -1.420885 | 1.292619  |
| H  | 4.193031  | -3.109994 | 2.987784  |
| H  | 5.827284  | -2.537174 | -6.625148 |

\*



C. QM/MM calculations

i) Absolute energies [in atomic units] of reactant complexes and transition states, calculated at the B3LYP-D/CHARMM level. Energies calculated at with the LACVP\* basis set are shown in bold, with energies calculated at the LACV3P++\*\*//LACVP level shown in regular typeface.

Table S8 Ibuprofen

|     |            | RC                  |                     | TS                  |                     |
|-----|------------|---------------------|---------------------|---------------------|---------------------|
|     |            | doublet             | quartet             | doublet             | quartet             |
| 2-1 | <b>BSI</b> | <b>-2286.955355</b> | <b>-2286.521954</b> | <b>-2286.910578</b> | <b>-2286.476634</b> |
|     | BSII       | -2287.515009        | -2287.502268        | -2287.473023        | -2287.457494        |
| 2-2 | <b>BSI</b> | <b>-2287.043379</b> | <b>-2286.608058</b> | <b>-2287.604303</b> | <b>-2286.55545</b>  |
|     | BSII       | -2286.985999        | -2287.591834        | -2287.554257        | -2287.540055        |
| 2-3 | <b>BSI</b> | <b>-2287.024093</b> | <b>-2286.590105</b> | <b>-2286.977048</b> | <b>-2286.542246</b> |
|     | BSII       | -2287.583164        | -2287.570744        | -2287.541497        | -2287.523461        |
| 3-1 | <b>BSI</b> | <b>-2286.416476</b> | <b>-2286.40992</b>  | <b>-2286.384964</b> | <b>-2286.376522</b> |
|     | BSII       | -2287.403479        | -2295.430582        | -2287.374527        | -2295.401698        |
| 3-2 | <b>BSI</b> | <b>-2286.860355</b> | <b>-2286.428147</b> | <b>-2286.823007</b> | <b>-2286.393763</b> |
|     | BSII       | -2287.424246        | -2287.41099         | -2287.392628        | -2287.381282        |
| 3-3 | <b>BSI</b> | <b>-2286.904600</b> | <b>-2286.469328</b> | <b>-2286.86455</b>  | <b>-2286.430798</b> |
|     | BSII       | -2287.468958        | -2287.453727        | -2287.433062        | -2287.419681        |
| 3-4 | <b>BSI</b> | <b>-2286.860751</b> | <b>-2286.427416</b> | <b>-2286.825046</b> | <b>-2286.392653</b> |
|     | BSII       | -2287.423835        | -2287.411053        | -2287.391643        | -2287.37970         |
| 3-5 | <b>BSI</b> | <b>-2286.879387</b> | <b>-2286.447364</b> | <b>-2286.841048</b> | <b>-2286.412373</b> |
|     | BSII       | -2287.445561        | -2287.433607        | -2287.412326        | -2287.40171         |
| 3-6 | <b>BSI</b> | <b>-2286.812164</b> | <b>-2286.379916</b> | <b>-2286.769279</b> | <b>-2286.339058</b> |
|     | BSII       | -2287.371834        | -2287.359169        | -2287.332635        | -2287.32341         |

Table S9 Warfarin

|      |            | RC                  |                     | TS                  |                     |
|------|------------|---------------------|---------------------|---------------------|---------------------|
|      |            | doublet             | quartet             | doublet             | quartet             |
| 6-1  | <b>BSI</b> | <b>-2202.392585</b> | <b>-2202.385102</b> | <b>-2202.358276</b> | <b>-2202.348133</b> |
|      | BSII       | -2202.918713        | -2202.911372        | -2202.88278         | -2202.875347        |
| 6-2  | <b>BSI</b> | <b>-2202.364383</b> | <b>-2202.357988</b> | <b>-2202.326595</b> | <b>-2202.31771</b>  |
|      | BSII       | -2202.890529        | -2202.883129        | -2202.85135         | -2202.844846        |
| 6-3  | <b>BSI</b> | <b>-2202.382826</b> | <b>-2202.375396</b> | <b>-2202.347411</b> | <b>-2202.33789</b>  |
|      | BSII       | -2202.909296        | -2202.901866        | -2202.872383        | -2202.865954        |
| 6-4  | <b>BSI</b> | <b>-2202.445216</b> | <b>-2202.438855</b> | <b>-2202.410457</b> | <b>-2202.401058</b> |
|      | BSII       | -2202.971914        | -2202.965043        | -2202.935472        | -2202.928054        |
| 6-5  | <b>BSI</b> | <b>-2202.280828</b> | <b>-2202.273439</b> | <b>-2202.23819</b>  | <b>-2202.230446</b> |
|      | BSII       | -2202.807494        | -2202.799501        | -2202.763219        | -2202.757555        |
| 6-6  | <b>BSI</b> | <b>-2202.315557</b> | <b>-2202.308816</b> | <b>-2202.27922</b>  | <b>-2202.269786</b> |
|      | BSII       | -2202.841112        | -2202.83381         | -2202.803113        | -2202.796459        |
| 6-7  | <b>BSI</b> | <b>-2202.363564</b> | <b>-2202.356474</b> | <b>-2202.328087</b> | <b>-2202.318658</b> |
|      | BSII       | -2202.889813        | -2202.883307        | -2202.852665        | -2202.845962        |
| 6-8  | <b>BSI</b> | <b>-2202.405586</b> | <b>-2202.399203</b> | <b>-2202.372868</b> | <b>-2202.362962</b> |
|      | BSII       | -2202.932485        | -2202.925761        | -2202.89844         | -2202.89105         |
| 6-9  | <b>BSI</b> | <b>-2202.474279</b> | <b>-2202.467601</b> | <b>-2202.439651</b> | <b>-2202.430155</b> |
|      | BSII       | -2203.001004        | -2202.993417        | -2202.964637        | -2202.957421        |
| 6-10 | <b>BSI</b> | <b>-2202.067967</b> | <b>-2202.061043</b> | <b>-2202.029947</b> | <b>-2202.021019</b> |
|      | BSII       | -2202.595319        | -2202.588081        | -2202.555965        | -2202.549263        |
| 7-1  | <b>BSI</b> | <b>-2202.348455</b> | <b>-2202.342585</b> | <b>-2202.318252</b> | <b>-2202.310651</b> |
|      | BSII       | -2202.872546        | -2202.866241        | -2202.840791        | -2202.836174        |
| 7-2  | <b>BSI</b> | <b>-2202.429379</b> | <b>-2202.423091</b> | <b>-2202.403411</b> | <b>-2202.395973</b> |
|      | BSII       | -2202.952839        | -2202.946445        | -2202.925423        | -2202.920714        |
| 7-3  | <b>BSI</b> | <b>-2202.171704</b> | <b>-2202.16535</b>  | <b>-2202.146833</b> | <b>-2202.14002</b>  |
|      | BSII       | -2202.69559         | -2202.688837        | -2202.669034        | -2202.665906        |
| 7-4  | <b>BSI</b> | <b>-2202.237821</b> | <b>-2202.231734</b> | <b>-2202.202903</b> | <b>-2202.195485</b> |
|      | BSII       | -2202.761703        | -2202.755236        | -2202.725099        | -2202.719995        |
| 7-5  | <b>BSI</b> | <b>-2202.525743</b> | <b>-2202.518398</b> | <b>-2202.494409</b> | <b>-2202.486709</b> |
|      | BSII       | -2203.049975        | -2203.041633        | -2203.017144        | -2203.012251        |
| 7-6  | <b>BSI</b> | <b>-2202.412531</b> | <b>-2202.4062</b>   | <b>-2202.387847</b> | <b>-2202.38064</b>  |
|      | BSII       | -2202.936516        | -2202.929492        | -2202.911053        | -2202.906257        |
| 7-7  | <b>BSI</b> | <b>-2202.463566</b> | <b>-2202.457326</b> | <b>-2202.439105</b> | <b>-2202.431333</b> |
|      | BSII       | -2202.988041        | -2202.981107        | -2202.962034        | -2202.956927        |
| 7-8  | <b>BSI</b> | <b>-2202.157169</b> | <b>-2202.150975</b> | <b>-2202.133097</b> | <b>-2202.125106</b> |
|      | BSII       | -2202.680427        | -2202.673767        | -2202.655574        | -2202.650477        |
| 7-9  | <b>BSI</b> | <b>-2202.215698</b> | <b>-2202.208695</b> | <b>-2202.191679</b> | <b>-2202.184385</b> |
|      | BSII       | -2202.737061        | -2202.730942        | -2202.714501        | -2202.709348        |
| 7-10 | <b>BSI</b> | <b>-2202.412531</b> | <b>-2202.4062</b>   | <b>-2202.387847</b> | <b>-2202.38064</b>  |
|      | BSII       | -2202.936516        | -2202.929492        | -2202.911053        | -2202.906257        |

Table S10 Diclofenac

|      |            | RC                  |                     | TS                  |                     |
|------|------------|---------------------|---------------------|---------------------|---------------------|
|      |            | doublet             | quartet             | doublet             | quartet             |
| 4'-1 | <b>BSI</b> | <b>-3298.292122</b> | <b>-3298.285393</b> | <b>-3298.262233</b> | <b>-3298.253394</b> |
|      | BSII       | -3298.948266        | -3298.940974        | -3298.918288        | -3298.909853        |
| 4'-2 | <b>BSI</b> | <b>-3298.265319</b> | <b>-3298.253606</b> | <b>-3298.235087</b> | <b>-3298.22453</b>  |
|      | BSII       | -3298.921329        | -3298.909139        | -3298.892236        | -3298.881474        |
| 4'-3 | <b>BSI</b> | <b>-3298.303822</b> | -                   | <b>-3298.269364</b> | -                   |
|      | BSII       | -3298.96073         | -                   | -3298.925186        | -                   |
| 4'-4 | <b>BSI</b> | <b>-3298.818899</b> | -                   | <b>-3298.775636</b> | -                   |
|      | BSII       | -3299.475896        | -                   | -3299.432545        | -                   |
| 4'-5 | <b>BSI</b> | <b>-3299.104651</b> | -                   | <b>-3299.071813</b> | -                   |
|      | BSII       | -3299.760286        | -                   | -3299.727779        | -                   |
| 5-1  | <b>BSI</b> | <b>-3297.934156</b> | -                   | <b>-3297.905164</b> | -                   |
|      | BSII       | -3298.591075        | -                   | -3298.561209        | -                   |
| 5-2  | <b>BSI</b> | <b>-3298.112906</b> | -                   | <b>-3298.093736</b> | -                   |
|      | BSII       | -3298.763581        | -                   | -3298.74464         | -                   |
| 5-3  | <b>BSI</b> | <b>-3298.660293</b> | <b>-3298.653803</b> | <b>-3298.641555</b> | <b>-3298.627358</b> |
|      | BSII       | -3299.31126         | -3299.304474        | -3299.292531        | -3299.279393        |

ii) Mulliken charges and spin densities (calculated with BSI)

Table S11 Ibuprofen C2 Quartet

|     |        | QUARTET          |       |       |      |       |                  |       |       |       |       |
|-----|--------|------------------|-------|-------|------|-------|------------------|-------|-------|-------|-------|
|     |        | reactant complex |       |       |      |       | transition state |       |       |       |       |
|     |        | Fe               | O     | S     | Por  | Ibu   | Fe               | O     | S     | Por   | Ibu   |
| 2-1 | SPIN   | 1.15             | 0.79  | 0.50  | 0.55 | 0.01  | 1.41             | 0.46  | 0.34  | 0.59  | 0.18  |
|     | CHARGE | 0.53             | -0.36 | -0.39 | 0.53 | -1.11 | 0.63             | -0.54 | -0.52 | -0.34 | -0.92 |
| 2-2 | SPIN   | 1.13             | 0.82  | 0.57  | 0.47 | 0.01  | 1.50             | 0.23  | 0.11  | 0.17  | 0.96  |
|     | CHARGE | 0.47             | -0.36 | -0.33 | 0.53 | -1.10 | 0.46             | -0.58 | -0.53 | -0.24 | -0.75 |
| 2-3 | SPIN   | 1.15             | 0.79  | 0.52  | 0.53 | 0.01  | 1.37             | 0.47  | 0.39  | 0.62  | 0.15  |
|     | CHARGE | 0.53             | -0.36 | -0.36 | 0.50 | -1.11 | 0.65             | -0.53 | -0.49 | -0.38 | -0.95 |

Table S12 Ibuprofen C2 Doublet

|     |        | DOUBLET          |       |       |       |       |                  |       |       |       |       |
|-----|--------|------------------|-------|-------|-------|-------|------------------|-------|-------|-------|-------|
|     |        | reactant complex |       |       |       |       | transition state |       |       |       |       |
|     |        | Fe               | O     | S     | Por   | Ibu   | Fe               | O     | S     | Por   | Ibu   |
| 2-1 | SPIN   | 1.24             | 0.86  | -0.57 | -0.55 | 0.00  | 1.17             | 0.68  | -0.54 | -0.59 | 0.23  |
|     | CHARGE | 0.47             | -0.41 | -0.29 | 0.48  | -1.12 | 0.50             | -0.54 | -0.35 | 0.47  | -0.96 |
| 2-2 | SPIN   | 1.22             | 0.87  | -0.64 | -0.48 | 0.00  | 1.54             | 0.53  | -0.53 | -0.58 | 0.01  |
|     | CHARGE | 0.44             | -0.41 | -0.22 | 0.47  | -1.11 | 0.53             | -0.55 | -0.31 | 0.47  | -0.99 |
| 2-3 | SPIN   | 1.23             | 0.86  | -0.57 | -0.55 | 0.00  | 1.02             | 0.55  | -0.56 | -0.54 | 0.50  |
|     | CHARGE | 0.50             | -0.41 | -0.27 | 0.44  | -1.12 | 0.47             | -0.60 | -0.36 | 0.43  | -0.83 |

Table S13 Ibuprofen C3 Quartet

|     |        | QUARTET          |       |       |      |       |                  |       |       |       |       |
|-----|--------|------------------|-------|-------|------|-------|------------------|-------|-------|-------|-------|
|     |        | reactant complex |       |       |      |       | transition state |       |       |       |       |
|     |        | Fe               | O     | S     | Por  | Ibu   | Fe               | O     | S     | Por   | Ibu   |
| 3-1 | SPIN   | 1.13             | 0.81  | 0.57  | 0.47 | 0.01  | 0.93             | 0.50  | 0.58  | 0.41  | 0.58  |
|     | CHARGE | 0.50             | -0.36 | -0.33 | 0.51 | -1.13 | 0.47             | -0.54 | -0.38 | -0.37 | -0.86 |
| 3-2 | SPIN   | 1.15             | 0.79  | 0.51  | 0.54 | 0.01  | 0.93             | 0.51  | 0.54  | 0.45  | 0.56  |
|     | CHARGE | 0.53             | -0.36 | -0.37 | 0.53 | -1.12 | 0.48             | -0.53 | -0.42 | -0.34 | -0.86 |
| 3-3 | SPIN   | 1.15             | 0.79  | 0.55  | 0.50 | 0.01  | 0.93             | 0.50  | 0.59  | 0.41  | 0.58  |
|     | CHARGE | 0.55             | -0.36 | -0.34 | 0.47 | -1.13 | 0.49             | -0.54 | -0.39 | -0.39 | -0.86 |
| 3-4 | SPIN   | 1.15             | 0.78  | 0.51  | 0.54 | 0.01  | 0.92             | 0.50  | 0.53  | 0.46  | 0.58  |
|     | CHARGE | 0.55             | -0.36 | -0.36 | 0.50 | -1.12 | 0.48             | -0.53 | -0.41 | -0.37 | -0.85 |
| 3-5 | SPIN   | 1.15             | 0.79  | 0.54  | 0.51 | 0.00  | 0.92             | 0.51  | 0.60  | 0.40  | 0.57  |
|     | CHARGE | 0.54             | -0.35 | -0.34 | 0.48 | -1.13 | 0.47             | -0.54 | -0.38 | -0.38 | -0.85 |
| 3-6 | SPIN   | 1.13             | 0.81  | 0.58  | 0.46 | 0.01  | 1.00             | 0.47  | 0.48  | 0.41  | 0.64  |
|     | CHARGE | 0.50             | -0.36 | -0.31 | 0.50 | -1.16 | 0.46             | -0.55 | -0.43 | -0.33 | -0.85 |

Table S14 Ibuprofen C3 Doublet

|     |        | DOUBLET          |       |       |       |       |                  |       |       |       |       |
|-----|--------|------------------|-------|-------|-------|-------|------------------|-------|-------|-------|-------|
|     |        | reactant complex |       |       |       |       | transition state |       |       |       |       |
|     |        | Fe               | O     | S     | Por   | Ibu   | Fe               | O     | S     | Por   | Ibu   |
| 3-1 | SPIN   | 1.21             | 0.89  | -0.64 | -0.50 | 0.00  | 1.04             | 0.56  | -0.69 | -0.38 | 0.47  |
|     | CHARGE | 0.49             | -0.35 | -0.30 | 0.49  | -1.13 | 0.46             | -0.53 | -0.34 | -0.39 | -0.87 |
| 3-2 | SPIN   | 1.24             | 0.86  | -0.57 | -0.55 | 0.00  | 1.03             | 0.53  | -0.63 | -0.44 | 0.51  |
|     | CHARGE | 0.49             | -0.41 | -0.27 | 0.47  | -1.12 | 0.40             | -0.61 | -0.30 | -0.36 | -0.81 |
| 3-3 | SPIN   | 1.23             | 0.87  | -0.64 | -0.48 | 0.00  | 0.99             | 0.20  | -0.75 | -0.33 | 0.88  |
|     | CHARGE | 0.49             | -0.41 | -0.22 | 0.41  | -1.14 | 0.35             | -0.67 | -0.24 | -0.40 | -0.73 |
| 3-4 | SPIN   | 1.24             | 0.86  | -0.58 | -0.54 | 0.00  | 0.99             | 0.34  | -0.65 | -0.42 | 0.74  |
|     | CHARGE | 0.51             | -0.41 | -0.26 | 0.44  | -1.13 | 0.38             | -0.65 | -0.28 | -0.40 | -0.73 |
| 3-5 | SPIN   | 1.22             | 0.87  | -0.61 | -0.50 | 0.00  | 1.02             | 0.51  | -0.69 | -0.39 | 0.53  |
|     | CHARGE | 0.49             | -0.40 | -0.24 | 0.42  | -1.13 | 0.39             | -0.61 | -0.27 | 0.42  | -0.80 |
| 3-6 | SPIN   | 1.23             | 0.87  | -0.66 | -0.47 | 0.00  | 0.99             | 0.15  | -0.70 | -0.37 | 0.93  |
|     | CHARGE | 0.46             | -0.42 | -0.21 | 0.43  | -1.16 | 0.35             | -0.67 | -0.25 | -0.38 | -0.76 |

Table S15 Warfarin C6 Quartet

|      |        | QUARTET          |       |       |      |       |                  |       |       |       |      |
|------|--------|------------------|-------|-------|------|-------|------------------|-------|-------|-------|------|
|      |        | reactant complex |       |       |      |       | transition state |       |       |       |      |
|      |        | Fe               | O     | S     | Por  | Warf  | Fe               | O     | S     | Por   | Warf |
| 6-1  | SPIN   | 1.11             | 0.83  | 0.35  | 0.67 | 0.03  | 1.32             | 0.57  | 0.31  | 0.38  | 0.43 |
|      | CHARGE | 0.43             | -0.40 | -0.10 | 0.15 | -0.09 | 0.49             | -0.49 | -0.07 | -0.04 | 0.12 |
| 6-2  | SPIN   | 1.12             | 0.83  | 0.34  | 0.68 | 0.03  | 1.29             | 0.57  | 0.32  | 0.42  | 0.39 |
|      | CHARGE | 0.43             | -0.41 | -0.11 | 0.17 | -0.09 | 0.48             | -0.49 | -0.06 | 0.00  | 0.08 |
| 6-3  | SPIN   | 1.12             | 0.83  | 0.36  | 0.66 | 0.03  | 1.34             | 0.57  | 0.27  | 0.35  | 0.47 |
|      | CHARGE | 0.41             | -0.41 | -0.05 | 0.14 | -0.09 | 0.45             | -0.50 | -0.01 | -0.06 | 0.12 |
| 6-4  | SPIN   | 1.12             | 0.83  | 0.39  | 0.62 | 0.03  | 1.26             | 0.57  | 0.37  | 0.45  | 0.34 |
|      | CHARGE | 0.43             | -0.41 | -0.05 | 0.12 | -0.09 | 0.48             | -0.48 | -0.04 | 0.00  | 0.04 |
| 6-5  | SPIN   | 1.13             | 0.82  | 0.38  | 0.64 | 0.03  | 1.31             | 0.57  | 0.35  | 0.39  | 0.38 |
|      | CHARGE | 0.43             | -0.41 | -0.07 | 0.14 | -0.09 | 0.48             | -0.49 | -0.05 | -0.03 | 0.09 |
| 6-6  | SPIN   | 1.11             | 0.84  | 0.36  | 0.66 | 0.03  | 1.32             | 0.56  | 0.30  | 0.37  | 0.44 |
|      | CHARGE | 0.43             | -0.40 | -0.09 | 0.15 | -0.09 | 0.48             | -0.49 | -0.06 | -0.05 | 0.12 |
| 6-7  | SPIN   | 1.11             | 0.84  | 0.36  | 0.67 | 0.03  | 1.33             | 0.57  | 0.29  | 0.36  | 0.46 |
|      | CHARGE | 0.43             | -0.40 | -0.10 | 0.16 | -0.08 | 0.48             | -0.50 | -0.07 | -0.06 | 0.14 |
| 6-8  | SPIN   | 1.11             | 0.84  | 0.35  | 0.67 | 0.03  | 1.30             | 0.58  | 0.30  | 0.41  | 0.41 |
|      | CHARGE | 0.42             | -0.40 | -0.07 | 0.15 | -0.10 | 0.46             | -0.49 | -0.04 | -0.02 | 0.08 |
| 6-9  | SPIN   | 1.12             | 0.83  | 0.39  | 0.63 | 0.03  | 1.28             | 0.57  | 0.37  | 0.45  | 0.34 |
|      | CHARGE | 0.44             | -0.40 | -0.07 | 0.12 | -0.08 | 0.49             | -0.49 | -0.05 | 0.00  | 0.04 |
| 6-10 | SPIN   | 1.12             | 0.82  | 0.39  | 0.63 | 0.03  | 1.25             | 0.58  | 0.38  | 0.48  | 0.32 |
|      | CHARGE | 0.43             | -0.41 | -0.08 | 0.13 | -0.08 | 0.49             | -0.48 | -0.06 | 0.03  | 0.03 |

Table S16 Warfarin C6 Doublet

|      |        | DOUBLET          |       |       |       |       |                  |       |       |       |      |
|------|--------|------------------|-------|-------|-------|-------|------------------|-------|-------|-------|------|
|      |        | reactant complex |       |       |       |       | transition state |       |       |       |      |
|      |        | Fe               | O     | S     | Por   | Warf  | Fe               | O     | S     | Por   | Warf |
| 6-1  | SPIN   | 1.17             | 0.90  | -0.36 | -0.72 | 0.00  | 1.07             | 0.54  | -0.33 | -0.59 | 0.31 |
|      | CHARGE | 0.42             | -0.40 | -0.11 | 0.18  | -0.09 | 0.42             | -0.49 | -0.09 | 0.02  | 0.14 |
| 6-2  | SPIN   | 1.19             | 0.90  | -0.34 | -0.74 | -0.01 | 1.08             | 0.56  | -0.34 | -0.63 | 0.32 |
|      | CHARGE | 0.42             | -0.40 | -0.12 | 0.19  | -0.10 | 0.42             | -0.49 | -0.09 | 0.06  | 0.10 |
| 6-3  | SPIN   | 1.18             | 0.89  | -0.37 | -0.70 | 0.00  | 1.08             | 0.53  | -0.31 | -0.59 | 0.29 |
|      | CHARGE | 0.40             | -0.40 | -0.06 | 0.16  | -0.10 | 0.38             | -0.49 | -0.04 | 0.02  | 0.12 |
| 6-4  | SPIN   | 1.18             | 0.89  | -0.41 | -0.66 | -0.01 | 1.08             | 0.58  | -0.40 | -0.60 | 0.33 |
|      | CHARGE | 0.42             | -0.40 | -0.06 | 0.14  | -0.09 | 0.43             | -0.48 | -0.05 | 0.03  | 0.08 |
| 6-5  | SPIN   | 1.20             | 0.89  | -0.39 | -0.69 | 0.00  | 1.11             | 0.58  | -0.42 | -0.58 | 0.31 |
|      | CHARGE | 0.42             | -0.40 | -0.08 | 0.16  | -0.09 | 0.45             | -0.49 | -0.08 | 0.02  | 0.09 |
| 6-6  | SPIN   | 1.18             | 0.90  | -0.38 | -0.70 | -0.01 | 1.08             | 0.55  | -0.36 | -0.59 | 0.32 |
|      | CHARGE | 0.43             | -0.40 | -0.10 | 0.16  | -0.09 | 0.43             | -0.49 | -0.08 | 0.02  | 0.13 |
| 6-7  | SPIN   | 1.18             | 0.90  | -0.37 | -0.71 | -0.01 | 1.07             | 0.54  | -0.34 | -0.59 | 0.31 |
|      | CHARGE | 0.43             | -0.39 | -0.12 | 0.17  | -0.09 | 0.43             | -0.49 | -0.10 | 0.01  | 0.14 |
| 6-8  | SPIN   | 1.18             | 0.90  | -0.36 | -0.71 | -0.01 | 1.08             | 0.54  | -0.31 | -0.59 | 0.29 |
|      | CHARGE | 0.41             | -0.40 | -0.09 | 0.17  | -0.10 | 0.40             | -0.48 | -0.06 | 0.03  | 0.11 |
| 6-9  | SPIN   | 1.18             | 0.90  | -0.40 | -0.67 | -0.01 | 1.07             | 0.58  | -0.39 | -0.60 | 0.34 |
|      | CHARGE | 0.43             | -0.40 | -0.08 | 0.14  | -0.09 | 0.43             | -0.48 | -0.07 | 0.03  | 0.08 |
| 6-10 | SPIN   | 1.19             | 0.89  | -0.40 | -0.68 | -0.01 | 1.10             | 0.59  | -0.40 | -0.60 | 0.31 |
|      | CHARGE | 0.42             | -0.40 | -0.09 | 0.15  | -0.08 | 0.44             | -0.48 | -0.08 | 0.05  | 0.07 |



Table S17 Warfarin C7 Quartet

|      |        | QUARTET          |       |       |      |       |                  |       |       |       |      |
|------|--------|------------------|-------|-------|------|-------|------------------|-------|-------|-------|------|
|      |        | reactant complex |       |       |      |       | transition state |       |       |       |      |
|      |        | Fe               | O     | S     | Por  | Warf  | Fe               | O     | S     | Por   | Warf |
| 7-1  | SPIN   | 1.12             | 0.82  | 0.41  | 0.62 | 0.03  | 1.25             | 0.51  | 0.29  | 0.40  | 0.55 |
|      | CHARGE | 0.44             | -0.41 | -0.07 | 0.12 | -0.08 | 0.44             | -0.49 | -0.04 | 0.00  | 0.09 |
| 7-2  | SPIN   | 1.12             | 0.82  | 0.44  | 0.58 | 0.04  | 1.23             | 0.51  | 0.32  | 0.40  | 0.54 |
|      | CHARGE | 0.46             | -0.40 | -0.08 | 0.09 | -0.08 | 0.46             | -0.49 | -0.06 | -0.01 | 0.10 |
| 7-3  | SPIN   | 1.11             | 0.83  | 0.42  | 0.60 | 0.04  | 1.29             | 0.49  | 0.28  | 0.33  | 0.60 |
|      | CHARGE | 0.45             | -0.40 | -0.08 | 0.11 | -0.08 | 0.46             | -0.49 | -0.06 | -0.05 | 0.14 |
| 7-4  | SPIN   | 1.13             | 0.82  | 0.37  | 0.65 | 0.03  | 1.29             | 0.51  | 0.27  | 0.40  | 0.54 |
|      | CHARGE | 0.43             | -0.42 | -0.10 | 0.17 | -0.08 | 0.45             | -0.49 | -0.06 | 0.09  | 0.02 |
| 7-5  | SPIN   | 1.11             | 0.84  | 0.35  | 0.67 | 0.03  | 1.29             | 0.51  | 0.24  | 0.37  | 0.58 |
|      | CHARGE | 0.43             | -0.41 | -0.07 | 0.14 | -0.09 | 0.43             | -0.50 | -0.02 | 0.00  | 0.08 |
| 7-6  | SPIN   | 1.11             | 0.84  | 0.35  | 0.67 | 0.03  | 1.29             | 0.51  | 0.24  | 0.37  | 0.58 |
|      | CHARGE | 0.42             | -0.40 | -0.07 | 0.16 | -0.10 | 0.43             | -0.50 | -0.02 | -0.01 | 0.10 |
| 7-7  | SPIN   | 1.12             | 0.83  | 0.35  | 0.67 | 0.03  | 1.26             | 0.52  | 0.27  | 0.48  | 0.55 |
|      | CHARGE | 0.41             | -0.41 | -0.06 | 0.16 | -0.10 | 0.43             | -0.50 | -0.03 | 0.07  | 0.03 |
| 7-8  | SPIN   | 1.12             | 0.83  | 0.36  | 0.66 | 0.03  | 1.28             | 0.51  | 0.26  | 0.41  | 0.55 |
|      | CHARGE | 0.42             | -0.41 | -0.08 | 0.15 | -0.09 | 0.44             | -0.50 | -0.04 | 0.01  | 0.09 |
| 7-9  | SPIN   | 1.12             | 0.82  | 0.42  | 0.60 | 0.03  | 1.18             | 0.52  | 0.34  | 0.49  | 0.47 |
|      | CHARGE | 0.43             | -0.41 | -0.06 | 0.12 | -0.09 | 0.44             | -0.49 | -0.03 | 0.06  | 0.02 |
| 7-10 | SPIN   | 1.11             | 0.84  | 0.35  | 0.67 | 0.03  | 1.29             | 0.51  | 0.24  | 0.37  | 0.58 |
|      | CHARGE | 0.42             | -0.40 | -0.07 | 0.16 | -0.10 | 0.43             | -0.50 | -0.02 | -0.01 | 0.10 |

Table S18 Warfarin C7 Doublet

|      |        | DOUBLET          |       |       |       |       |                  |       |       |       |      |
|------|--------|------------------|-------|-------|-------|-------|------------------|-------|-------|-------|------|
|      |        | reactant complex |       |       |       |       | transition state |       |       |       |      |
|      |        | Fe               | O     | S     | Por   | Warf  | Fe               | O     | S     | Por   | Warf |
| 7-1  | SPIN   | 1.20             | 0.89  | -0.40 | -0.68 | -0.01 | 1.05             | 0.51  | -0.35 | -0.67 | 0.46 |
|      | CHARGE | 0.43             | -0.40 | -0.09 | 0.15  | -0.09 | 0.40             | -0.49 | -0.08 | 0.09  | 0.08 |
| 7-2  | SPIN   | 1.19             | 0.89  | -0.46 | -0.62 | -0.01 | 1.05             | 0.51  | -0.41 | -0.62 | 0.46 |
|      | CHARGE | 0.45             | -0.39 | -0.09 | 0.12  | -0.08 | 0.43             | -0.49 | -0.09 | 0.05  | 0.10 |
| 7-3  | SPIN   | 1.18             | 0.91  | -0.42 | -0.65 | -0.01 | 1.05             | 0.50  | -0.38 | -0.63 | 0.46 |
|      | CHARGE | 0.44             | -0.39 | -0.10 | 0.13  | -0.08 | 0.42             | -0.49 | -0.10 | 0.05  | 0.11 |
| 7-4  | SPIN   | 1.20             | 0.88  | -0.35 | -0.74 | 0.00  | 1.08             | 0.53  | -0.33 | -0.72 | 0.43 |
|      | CHARGE | 0.42             | -0.41 | -0.12 | 0.21  | -0.09 | 0.42             | -0.50 | -0.10 | 0.15  | 0.04 |
| 7-5  | SPIN   | 1.21             | 0.88  | -0.38 | -0.70 | 0.00  | 1.06             | 0.50  | -0.32 | -0.69 | 0.44 |
|      | CHARGE | 0.42             | -0.41 | -0.09 | 0.17  | -0.10 | 0.38             | -0.50 | -0.07 | 0.11  | 0.07 |
| 7-6  | SPIN   | 1.18             | 0.90  | -0.35 | -0.73 | 0.00  | 1.05             | 0.49  | -0.28 | -0.69 | 0.43 |
|      | CHARGE | 0.41             | -0.40 | -0.09 | 0.19  | -0.11 | 0.37             | -0.49 | -0.07 | 0.10  | 0.09 |
| 7-7  | SPIN   | 1.19             | 0.89  | -0.34 | -0.73 | 0.00  | 1.07             | 0.51  | -0.30 | -0.72 | 0.43 |
|      | CHARGE | 0.40             | -0.41 | -0.09 | 0.20  | -0.10 | 0.38             | -0.50 | -0.07 | 0.14  | 0.04 |
| 7-8  | SPIN   | 1.19             | 0.89  | -0.35 | -0.73 | 0.00  | 1.05             | 0.49  | -0.30 | -0.70 | 0.45 |
|      | CHARGE | 0.41             | -0.41 | -0.10 | 0.19  | -0.10 | 0.38             | -0.50 | -0.08 | 0.11  | 0.08 |
| 7-9  | SPIN   | 1.19             | 0.89  | -0.43 | -0.65 | -0.01 | 1.07             | 0.53  | -0.40 | -0.64 | 0.44 |
|      | CHARGE | 0.43             | -0.40 | -0.08 | 0.14  | -0.09 | 0.43             | -0.49 | -0.07 | 0.09  | 0.05 |
| 7-10 | SPIN   | 1.18             | 0.90  | -0.35 | -0.73 | 0.00  | 1.05             | 0.49  | -0.28 | -0.69 | 0.43 |
|      | CHARGE | 0.41             | -0.40 | -0.09 | 0.19  | -0.11 | 0.37             | -0.49 | -0.07 | 0.10  | 0.09 |

Table S19 Diclofenac C4' Quartet

|      |        | QUARTET          |       |       |      |       |                  |       |       |      |       |
|------|--------|------------------|-------|-------|------|-------|------------------|-------|-------|------|-------|
|      |        | reactant complex |       |       |      |       | transition state |       |       |      |       |
|      |        | Fe               | O     | S     | Por  | Dicl  | Fe               | O     | S     | Por  | Dicl  |
| 4'-1 | SPIN   | 1.14             | 0.80  | 0.66  | 0.38 | 0.01  | 1.23             | 0.65  | 0.44  | 0.35 | 0.33  |
|      | CHARGE | 0.47             | -0.42 | -0.21 | 0.42 | -0.31 | 0.49             | -0.47 | -0.35 | 0.42 | -0.12 |
| 4'-2 | SPIN   | 1.13             | 0.81  | 0.66  | 0.37 | 0.02  | 1.23             | 0.64  | 0.45  | 0.35 | 0.33  |
|      | CHARGE | 0.48             | -0.40 | -0.20 | 0.38 | -0.24 | 0.49             | -0.47 | -0.35 | 0.40 | -0.06 |

Table S20 Diclofenac C4' Doublet

|      |        | DOUBLET          |       |       |       |       |                  |       |       |       |       |
|------|--------|------------------|-------|-------|-------|-------|------------------|-------|-------|-------|-------|
|      |        | reactant complex |       |       |       |       | transition state |       |       |       |       |
|      |        | Fe               | O     | S     | Por   | Dicl  | Fe               | O     | S     | Por   | Dicl  |
| 4'-1 | SPIN   | 1.22             | 0.88  | -0.72 | -0.39 | 0.00  | 1.22             | 0.58  | -0.49 | -0.32 | 0.00  |
|      | CHARGE | 0.46             | -0.41 | -0.18 | 0.40  | -0.31 | 0.43             | -0.46 | -0.36 | 0.40  | -0.04 |
| 4'-2 | SPIN   | 1.18             | 0.90  | -0.75 | -0.36 | 0.00  | 1.18             | 0.46  | -0.39 | -0.20 | -0.05 |
|      | CHARGE | 0.43             | -0.39 | -0.17 | 0.38  | -0.25 | 0.38             | -0.46 | -0.41 | 0.38  | 0.12  |
| 4'-3 | SPIN   | 1.21             | 0.90  | -0.75 | -0.38 | 0.00  | 1.22             | 0.65  | -0.55 | -0.41 | 0.06  |
|      | CHARGE | 0.46             | -0.39 | -0.17 | 0.34  | -0.17 | 0.47             | -0.45 | -0.32 | 0.37  | 0.01  |
| 4'-4 | SPIN   | 1.22             | 0.88  | -0.72 | -0.39 | 0.00  | 1.09             | 0.35  | -0.47 | -0.25 | 0.26  |
|      | CHARGE | 0.46             | -0.41 | -0.18 | 0.40  | -0.31 | 0.38             | -0.50 | -0.42 | 0.39  | 0.11  |
| 4'-5 | SPIN   | 1.19             | 0.90  | -0.73 | -0.38 | 0.00  | 1.19             | 0.57  | -0.52 | -0.29 | 0.04  |
|      | CHARGE | 0.42             | -0.39 | -0.19 | 0.41  | -0.25 | 0.40             | -0.46 | -0.36 | 0.41  | 0.01  |

Table S21 Diclofenac C5 Quartet

|     |        | QUARTET          |       |       |      |       |                  |       |       |      |      |
|-----|--------|------------------|-------|-------|------|-------|------------------|-------|-------|------|------|
|     |        | reactant complex |       |       |      |       | transition state |       |       |      |      |
|     |        | Fe               | O     | S     | Por  | Dicl  | Fe               | O     | S     | Por  | Dicl |
| 5-3 | SPIN   | 1.12             | 0.81  | 0.60  | 0.38 | 0.08  | 1.40             | 0.59  | 0.14  | 0.19 | 0.68 |
|     | CHARGE | 0.47             | -0.40 | -0.23 | 0.38 | -0.28 | 0.47             | -0.50 | -0.54 | 0.35 | 0.17 |

Table S22 Diclofenac C5 Doublet

|     |        | DOUBLET          |       |       |       |       |                  |       |       |       |       |
|-----|--------|------------------|-------|-------|-------|-------|------------------|-------|-------|-------|-------|
|     |        | reactant complex |       |       |       |       | transition state |       |       |       |       |
|     |        | Fe               | O     | S     | Por   | Dicl  | Fe               | O     | S     | Por   | Dicl  |
| 5-1 | SPIN   | 1.19             | 0.90  | -0.82 | -0.29 | 0.00  | 1.14             | 0.53  | -0.47 | -0.24 | 0.03  |
|     | CHARGE | 0.43             | -0.39 | -0.14 | 0.34  | -0.33 | 0.38             | -0.46 | -0.42 | 0.39  | 0.02  |
| 5-2 | SPIN   | 1.18             | 0.90  | -0.67 | -0.35 | -0.08 | 1.19             | 0.39  | -0.13 | -0.09 | -0.37 |
|     | CHARGE | 0.43             | -0.39 | -0.21 | 0.35  | -0.25 | 0.38             | -0.47 | -0.57 | 0.33  | 0.27  |
| 5-3 | SPIN   | 1.18             | 0.90  | -0.68 | -0.37 | -0.05 | 1.23             | 0.39  | -0.14 | -0.10 | -0.39 |
|     | CHARGE | 0.43             | -0.39 | -0.20 | 0.37  | -0.27 | 0.39             | -0.47 | -0.56 | 0.33  | 0.26  |

### iii) Cartesian coordinates of QM region

#### Diclofenac 4'-1 Reactant Complex Doublet

|      |           |           |           |
|------|-----------|-----------|-----------|
| C1   | -1.984816 | 0.077129  | 2.971950  |
| S2   | -1.291004 | 1.191700  | 1.707387  |
| H3   | -3.028195 | 0.375748  | 3.124001  |
| H4   | -1.978108 | -0.948441 | 2.593088  |
| O5   | 1.096838  | -0.531957 | -1.204658 |
| Fe6  | 0.101145  | 0.010575  | -0.020968 |
| N7   | -0.252331 | -1.866502 | 0.682618  |
| N8   | -1.536604 | -0.126609 | -1.196050 |
| N9   | 0.304159  | 1.977864  | -0.502308 |
| N10  | 1.593428  | 0.205548  | 1.332971  |
| C11  | 0.562107  | -2.589894 | 1.516506  |
| C12  | 0.123259  | -3.961573 | 1.591764  |
| C13  | -0.969627 | -4.060505 | 0.783000  |
| C14  | -1.184856 | -2.750262 | 0.209043  |
| C15  | -2.297192 | -1.239925 | -1.413917 |
| C16  | -3.288577 | -0.977411 | -2.438903 |
| C17  | -3.120887 | 0.319949  | -2.826511 |
| C18  | -2.021039 | 0.833448  | -2.028787 |
| C19  | -0.468501 | 2.659370  | -1.396899 |
| C20  | -0.030690 | 4.031615  | -1.489739 |
| C21  | 1.012864  | 4.180378  | -0.626546 |
| C22  | 1.222780  | 2.876629  | -0.019738 |
| C23  | 2.376518  | 1.310986  | 1.519396  |
| C24  | 3.430073  | 1.023579  | 2.463652  |
| C25  | 3.293230  | -0.281617 | 2.824191  |
| C26  | 2.144997  | -0.785026 | 2.106095  |
| C27  | 1.677641  | -2.088497 | 2.173839  |
| H28  | 2.239503  | -2.785762 | 2.782749  |
| C29  | -2.152144 | -2.450235 | -0.747762 |
| H30  | -2.841370 | -3.243337 | -1.002097 |
| C31  | -1.534311 | 2.135301  | -2.114882 |
| H32  | -1.997689 | 2.802257  | -2.829213 |
| C33  | 2.218641  | 2.534476  | 0.884889  |
| H34  | 2.988710  | 3.259483  | 1.097394  |
| C35  | 5.012032  | -3.195252 | -3.435778 |
| C36  | 4.849699  | -2.701993 | -2.124756 |
| C37  | 3.607041  | -2.609367 | -1.510980 |
| C38  | 2.467334  | -3.003722 | -2.209541 |
| C39  | 2.583626  | -3.480156 | -3.510343 |
| C40  | 3.837930  | -3.576187 | -4.100183 |
| C141 | 6.262759  | -2.121642 | -1.263657 |
| H42  | 3.522906  | -2.191651 | -0.515461 |
| H43  | 1.494686  | -2.895246 | -1.746195 |
| H44  | 1.716781  | -3.775021 | -4.085399 |
| C145 | 3.921802  | -4.190003 | -5.752914 |
| C46  | 9.164431  | -6.078943 | -2.824944 |
| C47  | 9.555640  | -4.851935 | -3.369184 |
| C48  | 8.621944  | -3.873276 | -3.725548 |
| C49  | 7.253976  | -4.190397 | -3.590893 |
| C50  | 6.856976  | -5.413077 | -3.031124 |
| C51  | 7.808208  | -6.348203 | -2.629113 |
| H52  | 9.912285  | -6.814473 | -2.548309 |
| H53  | 10.605270 | -4.624321 | -3.510933 |
| N54  | 6.282728  | -3.250028 | -4.025925 |
| H55  | 5.798482  | -5.630319 | -2.930832 |

|     |           |           |           |
|-----|-----------|-----------|-----------|
| H56 | 7.488257  | -7.289590 | -2.194743 |
| H57 | 6.308060  | -3.025015 | -5.007676 |
| C58 | 9.013958  | -2.476793 | -4.202068 |
| H59 | 8.255027  | -1.777582 | -3.847895 |
| H60 | 9.013512  | -2.438905 | -5.299436 |
| C61 | 10.401080 | -2.012848 | -3.732110 |
| O62 | 11.385058 | -2.626345 | -4.221299 |
| O63 | 10.459382 | -1.070244 | -2.905868 |
| H64 | -1.504115 | 0.053379  | 3.963486  |
| H65 | 0.602905  | -4.759681 | 2.161766  |
| H66 | -1.537338 | -4.964394 | 0.572324  |
| H67 | -4.011334 | -1.723326 | -2.764901 |
| H68 | -3.626759 | 0.957605  | -3.564958 |
| H69 | -0.510429 | 4.799053  | -2.093803 |
| H70 | 1.497394  | 5.149366  | -0.459623 |
| H71 | 4.172235  | 1.746710  | 2.786923  |
| H72 | 3.892051  | -0.865416 | 3.514699  |

Diclofenac 4'-1 Reactant Complex Quartet

|     |           |           |           |
|-----|-----------|-----------|-----------|
| C1  | -1.957065 | 0.077094  | 2.962298  |
| S2  | -1.248478 | 1.186934  | 1.702396  |
| H3  | -2.999917 | 0.383961  | 3.105628  |
| H4  | -1.954512 | -0.947696 | 2.582435  |
| O5  | 1.116557  | -0.557449 | -1.235987 |
| Fe6 | 0.141915  | -0.002606 | -0.046834 |
| N7  | -0.221453 | -1.872701 | 0.662379  |
| N8  | -1.514362 | -0.134053 | -1.205994 |
| N9  | 0.333753  | 1.968212  | -0.518364 |
| N10 | 1.626264  | 0.198001  | 1.306608  |
| C11 | 0.589280  | -2.595568 | 1.499910  |
| C12 | 0.136042  | -3.960584 | 1.592398  |
| C13 | -0.961826 | -4.057271 | 0.790116  |
| C14 | -1.165138 | -2.752138 | 0.202028  |
| C15 | -2.278989 | -1.244256 | -1.418334 |
| C16 | -3.276269 | -0.981319 | -2.437691 |
| C17 | -3.106186 | 0.315902  | -2.827833 |
| C18 | -2.001377 | 0.825786  | -2.036111 |
| C19 | -0.447292 | 2.648559  | -1.407776 |
| C20 | -0.020023 | 4.021807  | -1.497597 |
| C21 | 1.024341  | 4.176162  | -0.636506 |
| C22 | 1.245746  | 2.871165  | -0.034551 |
| C23 | 2.404986  | 1.307503  | 1.499903  |
| C24 | 3.449452  | 1.020905  | 2.454444  |
| C25 | 3.309194  | -0.284759 | 2.816912  |
| C26 | 2.171134  | -0.790578 | 2.086285  |
| C27 | 1.706194  | -2.094420 | 2.155471  |
| H28 | 2.265082  | -2.788363 | 2.771124  |
| C29 | -2.136223 | -2.452904 | -0.750728 |
| H30 | -2.830790 | -3.243356 | -1.000455 |
| C31 | -1.514220 | 2.127400  | -2.123517 |
| H32 | -1.975725 | 2.794769  | -2.838019 |
| C33 | 2.246396  | 2.532279  | 0.869180  |
| H34 | 3.014058  | 3.259547  | 1.081323  |
| C35 | 4.984922  | -3.105141 | -3.362135 |
| C36 | 4.817083  | -2.607405 | -2.053373 |
| C37 | 3.570251  | -2.483644 | -1.451833 |
| C38 | 2.428051  | -2.858877 | -2.155830 |
| C39 | 2.553549  | -3.358421 | -3.449138 |

|      |           |           |           |
|------|-----------|-----------|-----------|
| C40  | 3.810158  | -3.472165 | -4.032467 |
| C141 | 6.236520  | -2.060077 | -1.182853 |
| H42  | 3.484643  | -2.057209 | -0.460127 |
| H43  | 1.453281  | -2.747680 | -1.701937 |
| H44  | 1.690082  | -3.658561 | -4.024690 |
| C145 | 3.900444  | -4.087864 | -5.685867 |
| C46  | 9.113397  | -6.055425 | -2.813646 |
| C47  | 9.514930  | -4.829010 | -3.351383 |
| C48  | 8.590786  | -3.836875 | -3.694272 |
| C49  | 7.219278  | -4.127835 | -3.531789 |
| C50  | 6.813831  | -5.350319 | -2.976963 |
| C51  | 7.755556  | -6.306753 | -2.605781 |
| H52  | 9.853860  | -6.805721 | -2.560103 |
| H53  | 10.565643 | -4.615961 | -3.504467 |
| N54  | 6.257740  | -3.169683 | -3.950108 |
| H55  | 5.753487  | -5.552851 | -2.859530 |
| H56  | 7.427270  | -7.253013 | -2.188128 |
| H57  | 6.276789  | -2.953640 | -4.934529 |
| C58  | 9.009551  | -2.464713 | -4.215659 |
| H59  | 8.257030  | -1.738052 | -3.906772 |
| H60  | 9.030890  | -2.479941 | -5.313202 |
| C61  | 10.397453 | -2.007516 | -3.737847 |
| O62  | 11.381043 | -2.626754 | -4.223457 |
| O63  | 10.457365 | -1.068894 | -2.908763 |
| H64  | -1.486518 | 0.051722  | 3.958752  |
| H65  | 0.613549  | -4.755877 | 2.166197  |
| H66  | -1.539299 | -4.957072 | 0.584479  |
| H67  | -4.002326 | -1.726332 | -2.760288 |
| H68  | -3.610446 | 0.954219  | -3.565251 |
| H69  | -0.509860 | 4.785984  | -2.098204 |
| H70  | 1.500622  | 5.146662  | -0.469388 |
| H71  | 4.188749  | 1.743360  | 2.781766  |
| H72  | 3.899925  | -0.869445 | 3.514021  |

Diclofenac 4'-1 Transition State Doublet

|     |           |           |           |
|-----|-----------|-----------|-----------|
| C1  | -1.829916 | 0.042108  | 2.878601  |
| S2  | -1.112434 | 1.140487  | 1.600813  |
| H3  | -2.880373 | 0.330996  | 2.994478  |
| H4  | -1.801794 | -0.989536 | 2.517864  |
| O5  | 1.343950  | -0.594358 | -1.328778 |
| Fe6 | 0.281209  | -0.072607 | -0.068984 |
| N7  | -0.093508 | -1.910645 | 0.637998  |
| N8  | -1.374202 | -0.202577 | -1.257704 |
| N9  | 0.485195  | 1.903473  | -0.600040 |
| N10 | 1.756804  | 0.138649  | 1.266323  |
| C11 | 0.690584  | -2.626966 | 1.516908  |
| C12 | 0.216027  | -3.980814 | 1.623460  |
| C13 | -0.882981 | -4.073996 | 0.821299  |
| C14 | -1.062327 | -2.783756 | 0.200051  |
| C15 | -2.167538 | -1.298056 | -1.439720 |
| C16 | -3.193716 | -1.021761 | -2.430559 |
| C17 | -3.017417 | 0.271643  | -2.828111 |
| C18 | -1.880388 | 0.765601  | -2.071745 |
| C19 | -0.326063 | 2.581880  | -1.459972 |
| C20 | 0.053744  | 3.969571  | -1.523818 |
| C21 | 1.104497  | 4.138816  | -0.673176 |
| C22 | 1.367819  | 2.823833  | -0.095542 |
| C23 | 2.518879  | 1.261130  | 1.455815  |

|      |           |           |           |
|------|-----------|-----------|-----------|
| C24  | 3.551829  | 0.991567  | 2.428383  |
| C25  | 3.407161  | -0.307680 | 2.813929  |
| C26  | 2.277051  | -0.826684 | 2.083207  |
| C27  | 1.802622  | -2.128230 | 2.176156  |
| H28  | 2.345476  | -2.815609 | 2.811606  |
| C29  | -2.032966 | -2.497009 | -0.756047 |
| H30  | -2.740835 | -3.281718 | -0.983885 |
| C31  | -1.403544 | 2.064448  | -2.159401 |
| H32  | -1.889938 | 2.741137  | -2.845065 |
| C33  | 2.349268  | 2.491851  | 0.833434  |
| H34  | 3.092881  | 3.230526  | 1.084701  |
| C35  | 4.744503  | -2.533608 | -2.942196 |
| C36  | 4.753055  | -2.141612 | -1.579048 |
| C37  | 3.608910  | -2.001514 | -0.822043 |
| C38  | 2.325739  | -2.236578 | -1.397537 |
| C39  | 2.309055  | -2.670071 | -2.751804 |
| C40  | 3.463742  | -2.766836 | -3.495577 |
| C141 | 6.301280  | -1.768347 | -0.864677 |
| H42  | 3.687736  | -1.691860 | 0.210230  |
| H43  | 1.531014  | -2.591114 | -0.755502 |
| H44  | 1.374304  | -2.970842 | -3.196276 |
| C145 | 3.364817  | -3.315538 | -5.172495 |
| C46  | 8.643990  | -5.783096 | -2.770155 |
| C47  | 9.106395  | -4.593221 | -3.333618 |
| C48  | 8.252433  | -3.517918 | -3.608657 |
| C49  | 6.877964  | -3.689734 | -3.337663 |
| C50  | 6.412168  | -4.886464 | -2.771624 |
| C51  | 7.286878  | -5.925924 | -2.474052 |
| H52  | 9.338097  | -6.592408 | -2.566877 |
| H53  | 10.158844 | -4.463545 | -3.555762 |
| N54  | 5.928192  | -2.671975 | -3.664930 |
| H55  | 5.349348  | -4.999332 | -2.587093 |
| H56  | 6.902459  | -6.845060 | -2.044935 |
| H57  | 5.858524  | -2.451684 | -4.648005 |
| C58  | 8.791428  | -2.208239 | -4.176754 |
| H59  | 8.107940  | -1.401327 | -3.910015 |
| H60  | 8.829032  | -2.275237 | -5.271432 |
| C61  | 10.218909 | -1.864743 | -3.691498 |
| O62  | 11.157535 | -2.561247 | -4.165286 |
| O63  | 10.343368 | -0.928960 | -2.866007 |
| H64  | -1.385436 | 0.032753  | 3.892592  |
| H65  | 0.699234  | -4.769897 | 2.196204  |
| H66  | -1.505722 | -4.949662 | 0.652323  |
| H67  | -3.944930 | -1.755600 | -2.717583 |
| H68  | -3.530560 | 0.923430  | -3.553247 |
| H69  | -0.489554 | 4.719943  | -2.098932 |
| H70  | 1.539455  | 5.129058  | -0.510313 |
| H71  | 4.282346  | 1.723823  | 2.755950  |
| H72  | 3.976529  | -0.888362 | 3.528738  |

Diclofenac 4'-1 Transition State Quartet

|     |           |           |           |
|-----|-----------|-----------|-----------|
| C1  | -1.840721 | 0.038490  | 2.896794  |
| S2  | -1.102161 | 1.122145  | 1.623832  |
| H3  | -2.888668 | 0.338807  | 3.007243  |
| H4  | -1.821657 | -0.993923 | 2.536115  |
| O5  | 1.325515  | -0.748034 | -1.299530 |
| Fe6 | 0.287724  | -0.056544 | -0.132693 |
| N7  | -0.128055 | -1.898364 | 0.630913  |
| N8  | -1.374818 | -0.189434 | -1.290047 |



|      |           |           |           |
|------|-----------|-----------|-----------|
| N9   | 0.479098  | 1.898737  | -0.626910 |
| N10  | 1.757478  | 0.154411  | 1.228851  |
| C11  | 0.669019  | -2.612214 | 1.491595  |
| C12  | 0.197338  | -3.967424 | 1.603975  |
| C13  | -0.905432 | -4.062906 | 0.805887  |
| C14  | -1.088298 | -2.770657 | 0.187543  |
| C15  | -2.175085 | -1.287496 | -1.462485 |
| C16  | -3.202870 | -1.009128 | -2.449924 |
| C17  | -3.030692 | 0.283362  | -2.846534 |
| C18  | -1.890703 | 0.780608  | -2.096948 |
| C19  | -0.341018 | 2.588509  | -1.482573 |
| C20  | 0.043406  | 3.975016  | -1.534020 |
| C21  | 1.093251  | 4.139394  | -0.682377 |
| C22  | 1.361206  | 2.826076  | -0.110374 |
| C23  | 2.515165  | 1.271594  | 1.433932  |
| C24  | 3.535427  | 0.999273  | 2.419852  |
| C25  | 3.385860  | -0.300008 | 2.797953  |
| C26  | 2.265780  | -0.817285 | 2.049914  |
| C27  | 1.784372  | -2.113159 | 2.147570  |
| H28  | 2.323446  | -2.798577 | 2.788590  |
| C29  | -2.055573 | -2.480631 | -0.771165 |
| H30  | -2.773542 | -3.258046 | -0.994660 |
| C31  | -1.418449 | 2.080574  | -2.177502 |
| H32  | -1.912943 | 2.763971  | -2.853204 |
| C33  | 2.341861  | 2.503129  | 0.814720  |
| H34  | 3.076294  | 3.249668  | 1.070618  |
| C35  | 4.789073  | -2.608873 | -2.975050 |
| C36  | 4.738272  | -2.258780 | -1.602088 |
| C37  | 3.569103  | -2.175081 | -0.875229 |
| C38  | 2.306242  | -2.391496 | -1.497101 |
| C39  | 2.348254  | -2.780306 | -2.867565 |
| C40  | 3.532810  | -2.838978 | -3.574479 |
| C141 | 6.252976  | -1.879300 | -0.825021 |
| H42  | 3.612225  | -1.925469 | 0.175844  |
| H43  | 1.485080  | -2.758301 | -0.904110 |
| H44  | 1.445446  | -3.101716 | -3.359581 |
| C145 | 3.495260  | -3.337716 | -5.268937 |
| C46  | 8.734632  | -5.822305 | -2.775333 |
| C47  | 9.188974  | -4.629864 | -3.346373 |
| C48  | 8.327934  | -3.562397 | -3.622957 |
| C49  | 6.952392  | -3.734697 | -3.349272 |
| C50  | 6.495392  | -4.937485 | -2.780737 |
| C51  | 7.378653  | -5.968545 | -2.480241 |
| H52  | 9.433824  | -6.625465 | -2.566999 |
| H53  | 10.240673 | -4.496886 | -3.568518 |
| N54  | 6.006635  | -2.716722 | -3.656045 |
| H55  | 5.434579  | -5.056732 | -2.596957 |
| H56  | 6.998774  | -6.887742 | -2.044858 |
| H57  | 6.010541  | -2.378962 | -4.605732 |
| C58  | 8.858336  | -2.249297 | -4.194370 |
| H59  | 8.172416  | -1.446202 | -3.922067 |
| H60  | 8.893315  | -2.314039 | -5.289244 |
| C61  | 10.282403 | -1.891935 | -3.708967 |
| O62  | 11.230340 | -2.571805 | -4.179246 |
| O63  | 10.389824 | -0.954023 | -2.880502 |
| H64  | -1.397733 | 0.029541  | 3.912163  |
| H65  | 0.681435  | -4.756242 | 2.177692  |
| H66  | -1.519901 | -4.944308 | 0.632259  |
| H67  | -3.949504 | -1.747561 | -2.741032 |
| H68  | -3.544221 | 0.935261  | -3.571293 |

|     |           |           |           |
|-----|-----------|-----------|-----------|
| H69 | -0.489405 | 4.733299  | -2.112190 |
| H70 | 1.533051  | 5.130432  | -0.517777 |
| H71 | 4.263396  | 1.729171  | 2.756621  |
| H72 | 3.954091  | -0.882794 | 3.513958  |

Diclofenac 4'-2 Reactant Complex Doublet

|      |           |           |           |
|------|-----------|-----------|-----------|
| C1   | -1.930812 | 0.114312  | 3.121564  |
| S2   | -1.328084 | 1.231170  | 1.814260  |
| H3   | -2.957591 | 0.422689  | 3.354038  |
| H4   | -1.961112 | -0.907994 | 2.736508  |
| O5   | 1.106966  | -0.432917 | -1.073304 |
| Fe6  | 0.092240  | 0.042189  | 0.121655  |
| N7   | -0.215370 | -1.839177 | 0.835610  |
| N8   | -1.528544 | -0.165922 | -1.073537 |
| N9   | 0.260120  | 1.992576  | -0.397159 |
| N10  | 1.571167  | 0.280011  | 1.474778  |
| C11  | 0.610272  | -2.545762 | 1.672211  |
| C12  | 0.222052  | -3.935531 | 1.729726  |
| C13  | -0.873882 | -4.054240 | 0.926652  |
| C14  | -1.123525 | -2.748290 | 0.365075  |
| C15  | -2.256082 | -1.299156 | -1.285795 |
| C16  | -3.209890 | -1.098605 | -2.355600 |
| C17  | -3.047440 | 0.185003  | -2.786007 |
| C18  | -1.999851 | 0.751720  | -1.959414 |
| C19  | -0.516724 | 2.625808  | -1.317636 |
| C20  | -0.107632 | 3.997923  | -1.456310 |
| C21  | 0.943183  | 4.195283  | -0.612039 |
| C22  | 1.175755  | 2.915197  | 0.048764  |
| C23  | 2.364346  | 1.385465  | 1.615801  |
| C24  | 3.428897  | 1.113795  | 2.560595  |
| C25  | 3.258804  | -0.166405 | 2.993556  |
| C26  | 2.113121  | -0.684324 | 2.287010  |
| C27  | 1.683560  | -2.000473 | 2.360451  |
| H28  | 2.255105  | -2.674892 | 2.986072  |
| C29  | -2.090993 | -2.492315 | -0.596274 |
| H30  | -2.747449 | -3.311688 | -0.848406 |
| C31  | -1.546779 | 2.061286  | -2.058144 |
| H32  | -2.011158 | 2.703606  | -2.793638 |
| C33  | 2.184789  | 2.598620  | 0.954637  |
| H34  | 2.946577  | 3.336046  | 1.153833  |
| C35  | 4.601801  | -2.707257 | -2.966656 |
| C36  | 4.469947  | -2.501125 | -1.580112 |
| C37  | 3.274981  | -2.681674 | -0.901930 |
| C38  | 2.144565  | -3.081376 | -1.606679 |
| C39  | 2.216954  | -3.262802 | -2.982922 |
| C40  | 3.428927  | -3.082586 | -3.641611 |
| Cl41 | 5.864734  | -1.958990 | -0.668987 |
| H42  | 3.224477  | -2.483551 | 0.161483  |
| H43  | 1.205215  | -3.210213 | -1.083325 |
| H44  | 1.341870  | -3.568221 | -3.544490 |
| Cl45 | 3.490608  | -3.359050 | -5.388183 |
| C46  | 8.813023  | -5.413699 | -2.722299 |
| C47  | 9.146286  | -4.060587 | -2.769233 |
| C48  | 8.189824  | -3.080850 | -3.053846 |
| C49  | 6.872376  | -3.497720 | -3.307311 |
| C50  | 6.536659  | -4.856022 | -3.260719 |
| C51  | 7.498239  | -5.817698 | -2.965714 |
| H52  | 9.573042  | -6.154224 | -2.500301 |
| H53  | 10.163013 | -3.737032 | -2.576510 |

|     |           |           |           |
|-----|-----------|-----------|-----------|
| N54 | 5.844201  | -2.530810 | -3.598237 |
| H55 | 5.509941  | -5.145991 | -3.459706 |
| H56 | 7.227935  | -6.867050 | -2.944691 |
| H57 | 5.765482  | -2.304818 | -4.577811 |
| C58 | 8.550926  | -1.601436 | -3.017411 |
| H59 | 8.499005  | -1.265077 | -1.977279 |
| H60 | 7.808725  | -1.042269 | -3.581772 |
| C61 | 9.952626  | -1.306708 | -3.553463 |
| O62 | 10.069152 | -0.947953 | -4.746184 |
| O63 | 10.914991 | -1.469051 | -2.744794 |
| H64 | -1.397859 | 0.066782  | 4.081426  |
| H65 | 0.748796  | -4.726719 | 2.270656  |
| H66 | -1.462149 | -4.938506 | 0.693361  |
| H67 | -3.895941 | -1.878456 | -2.683663 |
| H68 | -3.502581 | 0.766357  | -3.592712 |
| H69 | -0.626397 | 4.706474  | -2.098941 |
| H70 | 1.417676  | 5.175148  | -0.506488 |
| H71 | 4.225774  | 1.806784  | 2.807630  |
| H72 | 3.824760  | -0.750559 | 3.717227  |

Diclofenac 4'-2 Reactant Complex Quartet

|     |           |           |           |
|-----|-----------|-----------|-----------|
| C1  | -1.957547 | 0.130544  | 3.120208  |
| S2  | -1.267331 | 1.213386  | 1.820993  |
| H3  | -2.985249 | 0.472422  | 3.291356  |
| H4  | -1.998439 | -0.896135 | 2.747363  |
| O5  | 1.083874  | -0.564750 | -1.148077 |
| Fe6 | 0.105500  | -0.000225 | 0.032450  |
| N7  | -0.249978 | -1.864650 | 0.760125  |
| N8  | -1.541693 | -0.148236 | -1.138089 |
| N9  | 0.287973  | 1.965414  | -0.469439 |
| N10 | 1.578126  | 0.213701  | 1.388440  |
| C11 | 0.570305  | -2.590993 | 1.585750  |
| C12 | 0.154292  | -3.972549 | 1.633877  |
| C13 | -0.935781 | -4.070622 | 0.821820  |
| C14 | -1.167246 | -2.755524 | 0.273582  |
| C15 | -2.289079 | -1.270617 | -1.355926 |
| C16 | -3.256719 | -1.035193 | -2.405045 |
| C17 | -3.081199 | 0.250913  | -2.818636 |
| C18 | -2.010400 | 0.791440  | -2.005104 |
| C19 | -0.487022 | 2.632877  | -1.376205 |
| C20 | -0.072109 | 4.011075  | -1.467638 |
| C21 | 0.963574  | 4.178743  | -0.594267 |
| C22 | 1.189265  | 2.878513  | 0.017959  |
| C23 | 2.358664  | 1.325098  | 1.564320  |
| C24 | 3.410678  | 1.044824  | 2.514941  |
| C25 | 3.261130  | -0.250432 | 2.904037  |
| C26 | 2.120866  | -0.764983 | 2.184078  |
| C27 | 1.670485  | -2.074187 | 2.256875  |
| H28 | 2.236308  | -2.760759 | 2.873361  |
| C29 | -2.131132 | -2.474948 | -0.686420 |
| H30 | -2.791433 | -3.286001 | -0.950383 |
| C31 | -1.533676 | 2.093549  | -2.107278 |
| H32 | -2.001359 | 2.745131  | -2.834212 |
| C33 | 2.187665  | 2.546691  | 0.929996  |
| H34 | 2.943090  | 3.284457  | 1.151113  |
| C35 | 4.790313  | -2.845264 | -3.026793 |
| C36 | 4.600156  | -2.550303 | -1.662945 |
| C37 | 3.357411  | -2.579392 | -1.045104 |
| C38 | 2.231854  | -2.931809 | -1.782878 |

|      |           |           |           |
|------|-----------|-----------|-----------|
| C39  | 2.374845  | -3.268842 | -3.124961 |
| C40  | 3.630122  | -3.214594 | -3.726954 |
| C141 | 5.986978  | -2.063429 | -0.709236 |
| H42  | 3.268482  | -2.294870 | -0.004224 |
| H43  | 1.258686  | -2.961439 | -1.311020 |
| H44  | 1.523231  | -3.585070 | -3.712662 |
| C145 | 3.746289  | -3.625554 | -5.443533 |
| C46  | 9.161701  | -5.444938 | -2.824422 |
| C47  | 9.410774  | -4.073614 | -2.786715 |
| C48  | 8.399270  | -3.137894 | -3.024142 |
| C49  | 7.110826  | -3.616286 | -3.319769 |
| C50  | 6.856744  | -4.993840 | -3.344751 |
| C51  | 7.872534  | -5.910786 | -3.096873 |
| H52  | 9.967182  | -6.150221 | -2.654427 |
| H53  | 10.407871 | -3.701332 | -2.579508 |
| N54  | 6.047906  | -2.695013 | -3.638257 |
| H55  | 5.852164  | -5.332473 | -3.578546 |
| H56  | 7.669504  | -6.975102 | -3.140778 |
| H57  | 5.976027  | -2.517455 | -4.626732 |
| C58  | 8.696738  | -1.647221 | -2.914624 |
| H59  | 8.726457  | -1.380434 | -1.853952 |
| H60  | 7.886977  | -1.087780 | -3.379023 |
| C61  | 10.043360 | -1.287197 | -3.547796 |
| O62  | 10.079386 | -0.981042 | -4.756684 |
| O63  | 11.059619 | -1.363563 | -2.788045 |
| H64  | -1.470668 | 0.084451  | 4.111043  |
| H65  | 0.662419  | -4.775240 | 2.170845  |
| H66  | -1.518719 | -4.954679 | 0.571218  |
| H67  | -3.978967 | -1.775086 | -2.744004 |
| H68  | -3.553108 | 0.837947  | -3.612674 |
| H69  | -0.554708 | 4.763607  | -2.091878 |
| H70  | 1.426227  | 5.156709  | -0.434501 |
| H71  | 4.171757  | 1.760676  | 2.806573  |
| H72  | 3.840233  | -0.830933 | 3.614084  |

Diclofenac 4'-2 Transition State Doublet

|     |           |           |           |
|-----|-----------|-----------|-----------|
| C1  | -1.849302 | 0.081345  | 3.014957  |
| S2  | -1.169546 | 1.159529  | 1.695545  |
| H3  | -2.885013 | 0.398981  | 3.177051  |
| H4  | -1.862033 | -0.950251 | 2.654966  |
| O5  | 1.231184  | -0.570439 | -1.218788 |
| Fe6 | 0.188045  | -0.072753 | 0.085776  |
| N7  | -0.152600 | -1.912464 | 0.799715  |
| N8  | -1.439570 | -0.244910 | -1.136621 |
| N9  | 0.403818  | 1.880788  | -0.513789 |
| N10 | 1.681983  | 0.146976  | 1.393611  |
| C11 | 0.645873  | -2.627015 | 1.670344  |
| C12 | 0.227999  | -4.005910 | 1.719878  |
| C13 | -0.862348 | -4.110219 | 0.905763  |
| C14 | -1.088770 | -2.807584 | 0.330898  |
| C15 | -2.199276 | -1.358683 | -1.330426 |
| C16 | -3.174374 | -1.133091 | -2.379214 |
| C17 | -2.997144 | 0.149271  | -2.807494 |
| C18 | -1.912080 | 0.689486  | -2.011672 |
| C19 | -0.397239 | 2.530754  | -1.404913 |
| C20 | -0.027052 | 3.920121  | -1.488680 |
| C21 | 1.014211  | 4.113893  | -0.631071 |
| C22 | 1.281605  | 2.811558  | -0.022237 |
| C23 | 2.446141  | 1.273308  | 1.550818  |

|      |           |           |           |
|------|-----------|-----------|-----------|
| C24  | 3.481228  | 1.023743  | 2.528933  |
| C25  | 3.315616  | -0.255228 | 2.970054  |
| C26  | 2.187724  | -0.792347 | 2.249104  |
| C27  | 1.728590  | -2.101588 | 2.354917  |
| H28  | 2.271425  | -2.772715 | 3.007312  |
| C29  | -2.049237 | -2.550135 | -0.633163 |
| H30  | -2.722028 | -3.359796 | -0.872328 |
| C31  | -1.442948 | 1.985957  | -2.127434 |
| H32  | -1.913301 | 2.634614  | -2.852618 |
| C33  | 2.266101  | 2.494342  | 0.910432  |
| H34  | 3.006655  | 3.240531  | 1.152178  |
| C35  | 4.515987  | -2.559400 | -2.773338 |
| C36  | 4.499529  | -2.214252 | -1.395501 |
| C37  | 3.344216  | -2.062992 | -0.667268 |
| C38  | 2.071017  | -2.271550 | -1.275604 |
| C39  | 2.067650  | -2.713821 | -2.633258 |
| C40  | 3.235454  | -2.806851 | -3.348764 |
| C141 | 6.018642  | -1.879269 | -0.607465 |
| H42  | 3.401971  | -1.756245 | 0.365442  |
| H43  | 1.256346  | -2.610665 | -0.650472 |
| H44  | 1.132744  | -3.021714 | -3.080505 |
| C145 | 3.180026  | -3.357758 | -5.028744 |
| C46  | 8.758896  | -5.393111 | -2.715870 |
| C47  | 9.068969  | -4.035060 | -2.759237 |
| C48  | 8.091945  | -3.060954 | -2.999476 |
| C49  | 6.768450  | -3.502203 | -3.182565 |
| C50  | 6.453141  | -4.864435 | -3.126879 |
| C51  | 7.441710  | -5.816659 | -2.898764 |
| H52  | 9.544647  | -6.121906 | -2.548074 |
| H53  | 10.088676 | -3.701817 | -2.609215 |
| N54  | 5.684635  | -2.595081 | -3.513045 |
| H55  | 5.423244  | -5.164111 | -3.292421 |
| H56  | 7.190884  | -6.870979 | -2.886205 |
| H57  | 5.523098  | -2.540965 | -4.511397 |
| C58  | 8.458230  | -1.583731 | -3.006612 |
| H59  | 8.398807  | -1.213368 | -1.978796 |
| H60  | 7.715531  | -1.043416 | -3.590408 |
| C61  | 9.873452  | -1.296107 | -3.534121 |
| O62  | 10.001011 | -0.914436 | -4.718005 |
| O63  | 10.829294 | -1.484327 | -2.723521 |
| H64  | -1.370822 | 0.053165  | 4.014351  |
| H65  | 0.745151  | -4.799036 | 2.258123  |
| H66  | -1.468418 | -4.981368 | 0.665478  |
| H67  | -3.898440 | -1.879789 | -2.696081 |
| H68  | -3.468431 | 0.748440  | -3.596447 |
| H69  | -0.569106 | 4.651394  | -2.090472 |
| H70  | 1.441256  | 5.109783  | -0.486405 |
| H71  | 4.237731  | 1.750280  | 2.805205  |
| H72  | 3.870418  | -0.819202 | 3.710446  |

Diclofenac 4'-2 Transition State Quartet

|     |           |           |           |
|-----|-----------|-----------|-----------|
| C1  | -1.878170 | 0.102875  | 3.066524  |
| S2  | -1.170688 | 1.165364  | 1.755365  |
| H3  | -2.910092 | 0.439677  | 3.215342  |
| H4  | -1.905901 | -0.928629 | 2.704507  |
| O5  | 1.217065  | -0.773036 | -1.178107 |
| Fe6 | 0.200222  | -0.051758 | -0.011923 |
| N7  | -0.204154 | -1.885179 | 0.779316  |
| N8  | -1.444356 | -0.210862 | -1.184173 |

|      |           |           |           |
|------|-----------|-----------|-----------|
| N9   | 0.389478  | 1.890417  | -0.543602 |
| N10  | 1.665920  | 0.180249  | 1.348651  |
| C11  | 0.609519  | -2.600011 | 1.623379  |
| C12  | 0.194997  | -3.979533 | 1.677450  |
| C13  | -0.897419 | -4.084319 | 0.865045  |
| C14  | -1.122840 | -2.778571 | 0.297827  |
| C15  | -2.215465 | -1.326896 | -1.369489 |
| C16  | -3.198843 | -1.092141 | -2.406839 |
| C17  | -3.020586 | 0.190669  | -2.833855 |
| C18  | -1.928231 | 0.727077  | -2.047321 |
| C19  | -0.418563 | 2.560652  | -1.426727 |
| C20  | -0.047916 | 3.949031  | -1.489962 |
| C21  | 0.991881  | 4.133168  | -0.627433 |
| C22  | 1.264091  | 2.829812  | -0.034592 |
| C23  | 2.431279  | 1.296542  | 1.525532  |
| C24  | 3.455950  | 1.038718  | 2.512784  |
| C25  | 3.287004  | -0.245796 | 2.934859  |
| C26  | 2.165273  | -0.774565 | 2.197053  |
| C27  | 1.700378  | -2.076034 | 2.302415  |
| H28  | 2.245345  | -2.750199 | 2.949547  |
| C29  | -2.079037 | -2.514768 | -0.674215 |
| H30  | -2.754562 | -3.319758 | -0.916127 |
| C31  | -1.463963 | 2.026808  | -2.153585 |
| H32  | -1.941622 | 2.683894  | -2.865407 |
| C33  | 2.253756  | 2.519724  | 0.888736  |
| H34  | 2.988894  | 3.270756  | 1.128182  |
| C35  | 4.588861  | -2.630768 | -2.837749 |
| C36  | 4.508629  | -2.332411 | -1.454111 |
| C37  | 3.331003  | -2.270421 | -0.746874 |
| C38  | 2.080698  | -2.475966 | -1.394734 |
| C39  | 2.144656  | -2.879221 | -2.759574 |
| C40  | 3.340878  | -2.909525 | -3.447029 |
| C141 | 5.997545  | -1.987379 | -0.609540 |
| H42  | 3.351112  | -2.031817 | 0.305264  |
| H43  | 1.243329  | -2.834673 | -0.820319 |
| H44  | 1.244765  | -3.226521 | -3.250352 |
| C145 | 3.341840  | -3.433694 | -5.139429 |
| C46  | 8.856687  | -5.425471 | -2.778260 |
| C47  | 9.163799  | -4.065832 | -2.789437 |
| C48  | 8.187225  | -3.090973 | -3.025924 |
| C49  | 6.865608  | -3.523453 | -3.244995 |
| C50  | 6.556637  | -4.889473 | -3.233092 |
| C51  | 7.543897  | -5.844399 | -3.002871 |
| H52  | 9.638687  | -6.156461 | -2.602020 |
| H53  | 10.180389 | -3.733572 | -2.612091 |
| N54  | 5.798246  | -2.587790 | -3.534389 |
| H55  | 5.532577  | -5.190042 | -3.428758 |
| H56  | 7.295862  | -6.899478 | -3.019121 |
| H57  | 5.677744  | -2.422295 | -4.523873 |
| C58  | 8.556723  | -1.613243 | -2.982993 |
| H59  | 8.525659  | -1.285686 | -1.939339 |
| H60  | 7.803700  | -1.046495 | -3.526988 |
| C61  | 9.958202  | -1.316923 | -3.540363 |
| O62  | 10.061184 | -0.960755 | -4.735399 |
| O63  | 10.932799 | -1.474969 | -2.745311 |
| H64  | -1.406825 | 0.068770  | 4.069982  |
| H65  | 0.713178  | -4.773600 | 2.213297  |
| H66  | -1.496043 | -4.958975 | 0.622315  |
| H67  | -3.928203 | -1.833292 | -2.726249 |
| H68  | -3.490660 | 0.786615  | -3.621626 |

|     |           |           |           |
|-----|-----------|-----------|-----------|
| H69 | -0.570732 | 4.691372  | -2.097479 |
| H70 | 1.427055  | 5.126909  | -0.474304 |
| H71 | 4.212992  | 1.759750  | 2.801366  |
| H72 | 3.845357  | -0.818794 | 3.666282  |

Diclofenac 4'-3 Reactant Complex Doublet

|      |           |           |           |
|------|-----------|-----------|-----------|
| C1   | -2.105625 | 0.200934  | 3.178028  |
| S2   | -1.362513 | 1.235220  | 1.857941  |
| H3   | -3.116627 | 0.586627  | 3.344800  |
| H4   | -2.192915 | -0.829522 | 2.821398  |
| O5   | 1.032836  | -0.590560 | -1.074902 |
| Fe6  | 0.041224  | 0.020657  | 0.078024  |
| N7   | -0.323071 | -1.835339 | 0.809092  |
| N8   | -1.601898 | -0.121904 | -1.102369 |
| N9   | 0.234937  | 1.983420  | -0.428138 |
| N10  | 1.528176  | 0.242944  | 1.425120  |
| C11  | 0.499310  | -2.554734 | 1.637638  |
| C12  | 0.098954  | -3.940675 | 1.678993  |
| C13  | -0.980407 | -4.049729 | 0.851870  |
| C14  | -1.221545 | -2.734319 | 0.303737  |
| C15  | -2.342772 | -1.245340 | -1.331258 |
| C16  | -3.319118 | -1.003928 | -2.375062 |
| C17  | -3.157070 | 0.291508  | -2.773658 |
| C18  | -2.077529 | 0.819985  | -1.961106 |
| C19  | -0.541526 | 2.652201  | -1.329864 |
| C20  | -0.120113 | 4.026417  | -1.434866 |
| C21  | 0.925698  | 4.191913  | -0.576505 |
| C22  | 1.151679  | 2.893379  | 0.041243  |
| C23  | 2.336342  | 1.337403  | 1.570435  |
| C24  | 3.402088  | 1.049112  | 2.503275  |
| C25  | 3.228440  | -0.235714 | 2.917014  |
| C26  | 2.066216  | -0.734640 | 2.222402  |
| C27  | 1.600466  | -2.038519 | 2.305148  |
| H28  | 2.164867  | -2.728196 | 2.919570  |
| C29  | -2.172529 | -2.455602 | -0.672079 |
| H30  | -2.820470 | -3.268703 | -0.957302 |
| C31  | -1.590325 | 2.119026  | -2.061046 |
| H32  | -2.034640 | 2.769510  | -2.800580 |
| C33  | 2.168741  | 2.557576  | 0.925256  |
| H34  | 2.939782  | 3.288460  | 1.118799  |
| C35  | 4.872160  | -2.846147 | -3.467341 |
| C36  | 4.659183  | -2.684283 | -2.083875 |
| C37  | 3.401057  | -2.750406 | -1.497412 |
| C38  | 2.291156  | -3.027400 | -2.291958 |
| C39  | 2.463582  | -3.262929 | -3.652698 |
| C40  | 3.728102  | -3.149817 | -4.224702 |
| Cl41 | 6.032216  | -2.306674 | -1.056675 |
| H42  | 3.287935  | -2.548530 | -0.440379 |
| H43  | 1.303595  | -3.047073 | -1.850184 |
| H44  | 1.626694  | -3.530840 | -4.285428 |
| Cl45 | 3.875337  | -3.388306 | -5.964807 |
| C46  | 9.095114  | -5.646259 | -3.496627 |
| C47  | 9.398473  | -4.308466 | -3.248075 |
| C48  | 8.438288  | -3.296953 | -3.381537 |
| C49  | 7.150062  | -3.662016 | -3.804548 |
| C50  | 6.836822  | -5.008627 | -4.034989 |
| C51  | 7.797833  | -6.005011 | -3.879529 |
| H52  | 9.863772  | -6.408170 | -3.397290 |
| H53  | 10.404254 | -4.021100 | -2.956005 |

|     |           |           |           |
|-----|-----------|-----------|-----------|
| N54 | 6.147821  | -2.655373 | -4.027610 |
| H55 | 5.830289  | -5.256757 | -4.354684 |
| H56 | 7.541477  | -7.041860 | -4.067469 |
| H57 | 6.127961  | -2.345340 | -4.991397 |
| C58 | 8.800754  | -1.864581 | -3.026466 |
| H59 | 9.081667  | -1.828334 | -1.970141 |
| H60 | 7.922814  | -1.234514 | -3.170986 |
| C61 | 9.957134  | -1.332567 | -3.881412 |
| O62 | 9.727480  | -1.001446 | -5.045682 |
| O63 | 11.110650 | -1.270692 | -3.315625 |
| H64 | -1.601528 | 0.150294  | 4.164058  |
| H65 | 0.618891  | -4.734535 | 2.221652  |
| H66 | -1.540831 | -4.944136 | 0.588732  |
| H67 | -4.005173 | -1.764438 | -2.740219 |
| H68 | -3.644357 | 0.909238  | -3.542023 |
| H69 | -0.600008 | 4.769782  | -2.072939 |
| H70 | 1.403619  | 5.164894  | -0.430030 |
| H71 | 4.194405  | 1.743587  | 2.763707  |
| H72 | 3.808435  | -0.822091 | 3.620946  |

Diclofenac 4'-3 Transition State Doublet

|     |           |           |           |
|-----|-----------|-----------|-----------|
| C1  | -1.978502 | 0.188933  | 3.068911  |
| S2  | -1.206090 | 1.214518  | 1.753260  |
| H3  | -3.002567 | 0.557275  | 3.195532  |
| H4  | -2.029715 | -0.843204 | 2.711579  |
| O5  | 1.217314  | -0.672814 | -1.240444 |
| Fe6 | 0.183434  | -0.080292 | -0.002508 |
| N7  | -0.199037 | -1.899707 | 0.746582  |
| N8  | -1.483305 | -0.212163 | -1.168501 |
| N9  | 0.373628  | 1.895615  | -0.539230 |
| N10 | 1.648656  | 0.163012  | 1.343992  |
| C11 | 0.593856  | -2.608316 | 1.618694  |
| C12 | 0.168079  | -3.982696 | 1.687441  |
| C13 | -0.911390 | -4.094069 | 0.859868  |
| C14 | -1.126769 | -2.794793 | 0.269444  |
| C15 | -2.246211 | -1.325348 | -1.374106 |
| C16 | -3.255516 | -1.069812 | -2.384701 |
| C17 | -3.102369 | 0.228269  | -2.775587 |
| C18 | -1.991149 | 0.744861  | -1.997417 |
| C19 | -0.452324 | 2.571128  | -1.390248 |
| C20 | -0.081500 | 3.961362  | -1.459902 |
| C21 | 0.982302  | 4.135002  | -0.625530 |
| C22 | 1.260950  | 2.822397  | -0.050482 |
| C23 | 2.437044  | 1.274551  | 1.493482  |
| C24 | 3.477030  | 1.011340  | 2.462337  |
| C25 | 3.294248  | -0.263571 | 2.906670  |
| C26 | 2.155993  | -0.786137 | 2.192023  |
| C27 | 1.683849  | -2.086293 | 2.298571  |
| H28 | 2.226500  | -2.763417 | 2.945014  |
| C29 | -2.083476 | -2.527291 | -0.700424 |
| H30 | -2.757882 | -3.331485 | -0.952045 |
| C31 | -1.525214 | 2.046558  | -2.086563 |
| H32 | -2.015833 | 2.716556  | -2.777583 |
| C33 | 2.264962  | 2.495894  | 0.853771  |
| H34 | 3.013768  | 3.239226  | 1.080575  |
| C35 | 4.541463  | -2.570233 | -2.913638 |
| C36 | 4.516218  | -2.305765 | -1.522651 |
| C37 | 3.357109  | -2.212746 | -0.777999 |
| C38 | 2.089346  | -2.383806 | -1.393226 |



|      |           |           |           |
|------|-----------|-----------|-----------|
| C39  | 2.100285  | -2.796208 | -2.754093 |
| C40  | 3.273173  | -2.831992 | -3.485401 |
| C141 | 6.046755  | -2.013720 | -0.733895 |
| H42  | 3.419530  | -1.976322 | 0.275377  |
| H43  | 1.257705  | -2.712174 | -0.788337 |
| H44  | 1.182414  | -3.131628 | -3.214398 |
| C145 | 3.208332  | -3.310331 | -5.187203 |
| C46  | 8.766747  | -5.426022 | -3.442184 |
| C47  | 9.089948  | -4.083240 | -3.256570 |
| C48  | 8.118071  | -3.073991 | -3.284994 |
| C49  | 6.783318  | -3.455759 | -3.512243 |
| C50  | 6.455048  | -4.807267 | -3.682720 |
| C51  | 7.434805  | -5.795603 | -3.649474 |
| H52  | 9.549868  | -6.177826 | -3.436826 |
| H53  | 10.123224 | -3.786844 | -3.100244 |
| N54  | 5.722983  | -2.480858 | -3.657715 |
| H55  | 5.418172  | -5.064853 | -3.874580 |
| H56  | 7.164228  | -6.835847 | -3.805284 |
| H57  | 5.558358  | -2.246191 | -4.628767 |
| C58  | 8.548906  | -1.636514 | -3.028336 |
| H59  | 8.765576  | -1.528198 | -1.961654 |
| H60  | 7.723999  | -0.968093 | -3.273589 |
| C61  | 9.798179  | -1.247490 | -3.842201 |
| O62  | 9.652055  | -0.901895 | -5.013392 |
| O63  | 10.931657 | -1.320397 | -3.236694 |
| H64  | -1.509031 | 0.152241  | 4.078363  |
| H65  | 0.676597  | -4.765945 | 2.249209  |
| H66  | -1.511075 | -4.971135 | 0.631564  |
| H67  | -3.961601 | -1.822323 | -2.727481 |
| H68  | -3.611350 | 0.861317  | -3.520276 |
| H69  | -0.614816 | 4.703126  | -2.058110 |
| H70  | 1.425645  | 5.123806  | -0.473986 |
| H71  | 4.256561  | 1.720237  | 2.725006  |
| H72  | 3.846984  | -0.829960 | 3.646172  |

Diclofenac 4'-4 Reactant Complex Doublet

|     |           |           |           |
|-----|-----------|-----------|-----------|
| C1  | -2.048853 | 0.237620  | 3.077026  |
| S2  | -1.343649 | 1.270967  | 1.751854  |
| H3  | -3.058904 | 0.617564  | 3.273773  |
| H4  | -2.139289 | -0.791253 | 2.717576  |
| O5  | 1.098156  | -0.565259 | -1.105689 |
| Fe6 | 0.077201  | 0.017791  | 0.036439  |
| N7  | -0.293359 | -1.842954 | 0.756195  |
| N8  | -1.543209 | -0.125245 | -1.167634 |
| N9  | 0.280690  | 1.981132  | -0.461443 |
| N10 | 1.536478  | 0.227815  | 1.421640  |
| C11 | 0.520690  | -2.570611 | 1.585408  |
| C12 | 0.108360  | -3.952867 | 1.624564  |
| C13 | -0.974872 | -4.050300 | 0.802288  |
| C14 | -1.201218 | -2.733157 | 0.253422  |
| C15 | -2.301213 | -1.239120 | -1.387162 |
| C16 | -3.280417 | -0.986600 | -2.425417 |
| C17 | -3.100303 | 0.303173  | -2.831281 |
| C18 | -2.010388 | 0.822637  | -2.026008 |
| C19 | -0.484892 | 2.656766  | -1.367772 |
| C20 | -0.065835 | 4.034152  | -1.448280 |
| C21 | 0.968065  | 4.190733  | -0.571819 |
| C22 | 1.181273  | 2.888862  | 0.040243  |
| C23 | 2.330478  | 1.328253  | 1.594605  |

|      |           |           |           |
|------|-----------|-----------|-----------|
| C24  | 3.392631  | 1.034010  | 2.529532  |
| C25  | 3.233584  | -0.261738 | 2.917950  |
| C26  | 2.078996  | -0.758856 | 2.206982  |
| C27  | 1.618352  | -2.064621 | 2.267479  |
| H28  | 2.175984  | -2.761029 | 2.881091  |
| C29  | -2.151278 | -2.448193 | -0.721710 |
| H30  | -2.811488 | -3.257862 | -0.997526 |
| C31  | -1.525078 | 2.122364  | -2.116523 |
| H32  | -1.976828 | 2.779944  | -2.846986 |
| C33  | 2.169086  | 2.552169  | 0.958641  |
| H34  | 2.928781  | 3.284381  | 1.185182  |
| C35  | 4.634611  | -3.065847 | -3.264740 |
| C36  | 4.498143  | -2.707231 | -1.909289 |
| C37  | 3.281893  | -2.721622 | -1.238936 |
| C38  | 2.144297  | -3.145559 | -1.918589 |
| C39  | 2.241176  | -3.560287 | -3.242745 |
| C40  | 3.466999  | -3.499120 | -3.904027 |
| C141 | 5.922046  | -2.172358 | -1.030132 |
| H42  | 3.218095  | -2.381830 | -0.212633 |
| H43  | 1.185520  | -3.142855 | -1.414184 |
| H44  | 1.367160  | -3.905854 | -3.782088 |
| C145 | 3.511407  | -3.972858 | -5.594897 |
| C46  | 8.777863  | -5.866818 | -2.903868 |
| C47  | 9.155887  | -4.527504 | -3.023653 |
| C48  | 8.244108  | -3.525950 | -3.371051 |
| C49  | 6.895991  | -3.901157 | -3.599323 |
| C50  | 6.525797  | -5.251656 | -3.486188 |
| C51  | 7.449518  | -6.227031 | -3.134608 |
| H52  | 9.509512  | -6.620695 | -2.635020 |
| H53  | 10.179212 | -4.230000 | -2.836176 |
| N54  | 5.889481  | -2.975630 | -3.939288 |
| H55  | 5.494375  | -5.522604 | -3.683783 |
| H56  | 7.131455  | -7.261224 | -3.057393 |
| H57  | 6.176069  | -2.019646 | -4.099423 |
| C58  | 8.668953  | -2.058165 | -3.432762 |
| H59  | 8.443331  | -1.594391 | -2.464547 |
| H60  | 8.089228  | -1.533402 | -4.192865 |
| C61  | 10.146341 | -1.797852 | -3.769317 |
| O62  | 10.390856 | -1.277236 | -4.873854 |
| O63  | 11.027837 | -2.122421 | -2.905345 |
| H64  | -1.526351 | 0.186472  | 4.048120  |
| H65  | 0.619034  | -4.748022 | 2.171382  |
| H66  | -1.559838 | -4.930495 | 0.547882  |
| H67  | -3.994944 | -1.733851 | -2.762450 |
| H68  | -3.589358 | 0.922235  | -3.594547 |
| H69  | -0.538598 | 4.790532  | -2.076564 |
| H70  | 1.452036  | 5.158382  | -0.410109 |
| H71  | 4.174094  | 1.736776  | 2.798581  |
| H72  | 3.819719  | -0.850229 | 3.619324  |

Diclofenac 4'-4 Transition State Doublet

|     |           |           |           |
|-----|-----------|-----------|-----------|
| C1  | -1.934508 | 0.203121  | 2.982977  |
| S2  | -1.200538 | 1.228684  | 1.657392  |
| H3  | -2.957247 | 0.567482  | 3.136835  |
| H4  | -1.996525 | -0.831104 | 2.632774  |
| O5  | 1.281612  | -0.746676 | -1.301591 |
| Fe6 | 0.214809  | -0.095778 | -0.031397 |
| N7  | -0.197003 | -1.897161 | 0.719062  |
| N8  | -1.420250 | -0.209431 | -1.235295 |

|      |           |           |           |
|------|-----------|-----------|-----------|
| N9   | 0.437530  | 1.890126  | -0.574069 |
| N10  | 1.646184  | 0.142644  | 1.353999  |
| C11  | 0.578392  | -2.617714 | 1.599252  |
| C12  | 0.138864  | -3.986235 | 1.657542  |
| C13  | -0.938099 | -4.081826 | 0.826920  |
| C14  | -1.130951 | -2.780007 | 0.239239  |
| C15  | -2.213065 | -1.304490 | -1.427030 |
| C16  | -3.218236 | -1.033799 | -2.436835 |
| C17  | -3.027665 | 0.252701  | -2.845728 |
| C18  | -1.904387 | 0.749781  | -2.073312 |
| C19  | -0.370161 | 2.575395  | -1.434799 |
| C20  | -0.009506 | 3.971072  | -1.470028 |
| C21  | 1.028301  | 4.137131  | -0.603715 |
| C22  | 1.293609  | 2.818590  | -0.036678 |
| C23  | 2.421721  | 1.260246  | 1.537798  |
| C24  | 3.449721  | 0.989557  | 2.516512  |
| C25  | 3.274717  | -0.295011 | 2.936708  |
| C26  | 2.147061  | -0.811374 | 2.201911  |
| C27  | 1.666252  | -2.110048 | 2.292418  |
| H28  | 2.189947  | -2.791571 | 2.949138  |
| C29  | -2.080916 | -2.500460 | -0.738677 |
| H30  | -2.770772 | -3.296658 | -0.979207 |
| C31  | -1.426282 | 2.049742  | -2.160566 |
| H32  | -1.910485 | 2.722845  | -2.853860 |
| C33  | 2.260173  | 2.488226  | 0.908016  |
| H34  | 2.990794  | 3.235487  | 1.178034  |
| C35  | 4.497257  | -2.736391 | -2.883819 |
| C36  | 4.504900  | -2.328034 | -1.528438 |
| C37  | 3.372007  | -2.155544 | -0.762282 |
| C38  | 2.072099  | -2.368890 | -1.332522 |
| C39  | 2.065046  | -2.931547 | -2.659855 |
| C40  | 3.221612  | -3.060816 | -3.400975 |
| C141 | 6.060563  | -1.983048 | -0.806898 |
| H42  | 3.453276  | -1.825326 | 0.263794  |
| H43  | 1.310414  | -2.771135 | -0.676298 |
| H44  | 1.127564  | -3.286060 | -3.069105 |
| C145 | 3.125962  | -3.742263 | -5.024115 |
| C46  | 8.524454  | -5.823771 | -2.969696 |
| C47  | 8.950656  | -4.498915 | -3.070954 |
| C48  | 8.065531  | -3.444223 | -3.312147 |
| C49  | 6.682200  | -3.748584 | -3.432793 |
| C50  | 6.264084  | -5.085408 | -3.348447 |
| C51  | 7.167036  | -6.118698 | -3.115687 |
| H52  | 9.242392  | -6.615791 | -2.786653 |
| H53  | 10.000070 | -4.257468 | -2.951032 |
| N54  | 5.687966  | -2.772256 | -3.670194 |
| H55  | 5.211935  | -5.303527 | -3.499894 |
| H56  | 6.816493  | -7.144243 | -3.074593 |
| H57  | 5.986905  | -1.862413 | -4.003142 |
| C58  | 8.571269  | -2.004497 | -3.406829 |
| H59  | 8.369623  | -1.503870 | -2.452481 |
| H60  | 8.012703  | -1.475433 | -4.180411 |
| C61  | 10.064596 | -1.820233 | -3.748238 |
| O62  | 10.334389 | -1.337948 | -4.863402 |
| O63  | 10.931647 | -2.158919 | -2.873256 |
| H64  | -1.452655 | 0.167469  | 3.980863  |
| H65  | 0.651180  | -4.769776 | 2.207512  |
| H66  | -1.548427 | -4.943726 | 0.579484  |
| H67  | -3.953687 | -1.768767 | -2.752655 |
| H68  | -3.519470 | 0.888176  | -3.594807 |

|     |           |           |           |
|-----|-----------|-----------|-----------|
| H69 | -0.528902 | 4.724475  | -2.067815 |
| H70 | 1.472638  | 5.122460  | -0.433757 |
| H71 | 4.222459  | 1.701967  | 2.788481  |
| H72 | 3.832858  | -0.872664 | 3.665130  |

Diclofenac 4'-5 Reactant Complex Doublet

|      |           |           |           |
|------|-----------|-----------|-----------|
| C1   | -1.914183 | 0.204244  | 3.146755  |
| S2   | -1.353667 | 1.284105  | 1.793588  |
| H3   | -2.950167 | 0.491248  | 3.365654  |
| H4   | -1.914002 | -0.833834 | 2.805120  |
| O5   | 1.064217  | -0.379009 | -1.087573 |
| Fe6  | 0.074509  | 0.103093  | 0.124316  |
| N7   | -0.255821 | -1.765460 | 0.847396  |
| N8   | -1.559411 | -0.075766 | -1.056455 |
| N9   | 0.275562  | 2.048564  | -0.392649 |
| N10  | 1.568148  | 0.318666  | 1.472224  |
| C11  | 0.554151  | -2.477005 | 1.693409  |
| C12  | 0.140522  | -3.855868 | 1.768930  |
| C13  | -0.955866 | -3.965575 | 0.965975  |
| C14  | -1.181031 | -2.662316 | 0.386863  |
| C15  | -2.309029 | -1.196913 | -1.258972 |
| C16  | -3.284437 | -0.968077 | -2.306109 |
| C17  | -3.111643 | 0.319023  | -2.727656 |
| C18  | -2.027186 | 0.856133  | -1.927680 |
| C19  | -0.470317 | 2.691290  | -1.336323 |
| C20  | -0.012201 | 4.049031  | -1.490449 |
| C21  | 1.017373  | 4.228202  | -0.616535 |
| C22  | 1.210671  | 2.950120  | 0.051537  |
| C23  | 2.389783  | 1.405527  | 1.599053  |
| C24  | 3.465866  | 1.115707  | 2.523258  |
| C25  | 3.277168  | -0.158148 | 2.960431  |
| C26  | 2.104751  | -0.651756 | 2.280918  |
| C27  | 1.642922  | -1.953552 | 2.374147  |
| H28  | 2.198330  | -2.634484 | 3.006549  |
| C29  | -2.146903 | -2.394185 | -0.576218 |
| H30  | -2.805778 | -3.210463 | -0.828822 |
| C31  | -1.522874 | 2.146310  | -2.055586 |
| H32  | -1.960103 | 2.781499  | -2.813855 |
| C33  | 2.227455  | 2.618114  | 0.941368  |
| H34  | 3.019859  | 3.333041  | 1.109345  |
| C35  | 4.595749  | -2.622398 | -2.943131 |
| C36  | 4.478387  | -2.377805 | -1.561846 |
| C37  | 3.289867  | -2.555202 | -0.866262 |
| C38  | 2.166448  | -3.013771 | -1.546380 |
| C39  | 2.227617  | -3.245866 | -2.917325 |
| C40  | 3.428126  | -3.046693 | -3.594417 |
| Cl41 | 5.877173  | -1.791033 | -0.689295 |
| H42  | 3.238849  | -2.310812 | 0.187046  |
| H43  | 1.233745  | -3.131221 | -1.010874 |
| H44  | 1.353958  | -3.583055 | -3.460132 |
| Cl45 | 3.478681  | -3.360503 | -5.331711 |
| C46  | 8.564185  | -5.624429 | -2.915675 |
| C47  | 9.006601  | -4.302249 | -2.879539 |
| C48  | 8.143561  | -3.226327 | -3.115248 |
| C49  | 6.792735  | -3.508995 | -3.392923 |
| C50  | 6.351119  | -4.841388 | -3.435133 |
| C51  | 7.223882  | -5.898097 | -3.197863 |
| H52  | 9.259762  | -6.436403 | -2.732869 |
| H53  | 10.042369 | -4.070445 | -2.663906 |

|     |           |           |           |
|-----|-----------|-----------|-----------|
| N54 | 5.843631  | -2.452706 | -3.575655 |
| H55 | 5.308410  | -5.035847 | -3.656539 |
| H56 | 6.862142  | -6.918331 | -3.247883 |
| H57 | 5.804659  | -2.036771 | -4.497811 |
| C58 | 8.659042  | -1.795375 | -3.019915 |
| H59 | 8.639499  | -1.490302 | -1.969892 |
| H60 | 7.989889  | -1.136983 | -3.571251 |
| C61 | 10.092119 | -1.670189 | -3.562600 |
| O62 | 10.249896 | -1.386570 | -4.762162 |
| O63 | 11.030766 | -1.919917 | -2.737872 |
| H64 | -1.373564 | 0.223142  | 4.108690  |
| H65 | 0.676759  | -4.639200 | 2.312896  |
| H66 | -1.560826 | -4.840595 | 0.741331  |
| H67 | -3.980626 | -1.731991 | -2.648611 |
| H68 | -3.586832 | 0.924391  | -3.507319 |
| H69 | -0.498463 | 4.782555  | -2.128590 |
| H70 | 1.494235  | 5.197761  | -0.467860 |
| H71 | 4.275709  | 1.799917  | 2.754108  |
| H72 | 3.844562  | -0.751405 | 3.671772  |

Diclofenac 4'-5 Transition State Doublet

|     |           |           |           |
|-----|-----------|-----------|-----------|
| C1  | -1.839240 | 0.162970  | 3.073142  |
| S2  | -1.242128 | 1.222820  | 1.705652  |
| H3  | -2.888550 | 0.430841  | 3.243290  |
| H4  | -1.806400 | -0.881648 | 2.754024  |
| O5  | 1.186838  | -0.564385 | -1.187879 |
| Fe6 | 0.159654  | -0.008551 | 0.091777  |
| N7  | -0.206650 | -1.831168 | 0.823918  |
| N8  | -1.482769 | -0.150328 | -1.113392 |
| N9  | 0.389451  | 1.946414  | -0.495793 |
| N10 | 1.644222  | 0.213730  | 1.415668  |
| C11 | 0.584209  | -2.546582 | 1.694684  |
| C12 | 0.157419  | -3.919554 | 1.755680  |
| C13 | -0.931224 | -4.021538 | 0.939424  |
| C14 | -1.142985 | -2.720458 | 0.354558  |
| C15 | -2.257011 | -1.256856 | -1.301254 |
| C16 | -3.255134 | -1.007252 | -2.325004 |
| C17 | -3.078072 | 0.281453  | -2.739279 |
| C18 | -1.963071 | 0.797396  | -1.966383 |
| C19 | -0.383223 | 2.607282  | -1.405774 |
| C20 | 0.035218  | 3.982748  | -1.515440 |
| C21 | 1.059219  | 4.160778  | -0.634059 |
| C22 | 1.283830  | 2.862966  | -0.010338 |
| C23 | 2.442811  | 1.319462  | 1.551684  |
| C24 | 3.497623  | 1.049714  | 2.502770  |
| C25 | 3.314472  | -0.223592 | 2.948330  |
| C26 | 2.154950  | -0.734128 | 2.258962  |
| C27 | 1.678307  | -2.032140 | 2.373112  |
| H28 | 2.218712  | -2.708953 | 3.021245  |
| C29 | -2.102292 | -2.452222 | -0.614943 |
| H30 | -2.773314 | -3.261027 | -0.859174 |
| C31 | -1.457882 | 2.081436  | -2.101833 |
| H32 | -1.920028 | 2.733090  | -2.828558 |
| C33 | 2.279707  | 2.536708  | 0.907121  |
| H34 | 3.047989  | 3.265616  | 1.113521  |
| C35 | 4.517325  | -2.444806 | -2.782292 |
| C36 | 4.506266  | -2.093162 | -1.410939 |
| C37 | 3.356547  | -1.996640 | -0.660462 |
| C38 | 2.087931  | -2.248723 | -1.252611 |

|      |           |           |           |
|------|-----------|-----------|-----------|
| C39  | 2.083834  | -2.699313 | -2.603285 |
| C40  | 3.248597  | -2.746619 | -3.339148 |
| C141 | 6.030915  | -1.700818 | -0.658236 |
| H42  | 3.418164  | -1.699264 | 0.376619  |
| H43  | 1.285926  | -2.601604 | -0.619936 |
| H44  | 1.156734  | -3.047037 | -3.038661 |
| C145 | 3.184171  | -3.315492 | -5.013581 |
| C46  | 8.458476  | -5.598342 | -2.832330 |
| C47  | 8.905568  | -4.279564 | -2.816589 |
| C48  | 8.042794  | -3.197235 | -3.039904 |
| C49  | 6.682795  | -3.484988 | -3.266061 |
| C50  | 6.233589  | -4.811253 | -3.281105 |
| C51  | 7.110323  | -5.873701 | -3.070792 |
| H52  | 9.159487  | -6.411220 | -2.668210 |
| H53  | 9.949958  | -4.053621 | -2.632227 |
| N54  | 5.708695  | -2.447392 | -3.513689 |
| H55  | 5.183388  | -4.997775 | -3.479755 |
| H56  | 6.747617  | -6.893871 | -3.109794 |
| H57  | 5.597848  | -2.197834 | -4.487067 |
| C58  | 8.582457  | -1.772906 | -2.998502 |
| H59  | 8.573663  | -1.430899 | -1.960194 |
| H60  | 7.914520  | -1.127156 | -3.567601 |
| C61  | 10.022046 | -1.667112 | -3.541819 |
| O62  | 10.184891 | -1.358557 | -4.735826 |
| O63  | 10.955798 | -1.944524 | -2.721694 |
| H64  | -1.341548 | 0.202282  | 4.063804  |
| H65  | 0.686897  | -4.701169 | 2.299717  |
| H66  | -1.548532 | -4.886043 | 0.708701  |
| H67  | -3.973007 | -1.751924 | -2.662100 |
| H68  | -3.566667 | 0.900477  | -3.504071 |
| H69  | -0.474603 | 4.730914  | -2.121069 |
| H70  | 1.503908  | 5.143401  | -0.461305 |
| H71  | 4.277333  | 1.759222  | 2.758519  |
| H72  | 3.875500  | -0.801432 | 3.671099  |

Diclofenac 5-1 Reactant Complex Doublet

|     |           |           |           |
|-----|-----------|-----------|-----------|
| C1  | -2.032900 | -0.385908 | 2.793425  |
| S2  | -1.484143 | 0.850878  | 1.577876  |
| H3  | -3.021889 | -0.079302 | 3.156664  |
| H4  | -2.138506 | -1.353647 | 2.294033  |
| O5  | 1.241071  | -0.592936 | -1.179291 |
| Fe6 | 0.136381  | -0.163062 | -0.040878 |
| N7  | -0.137634 | -2.061558 | 0.610339  |
| N8  | -1.465402 | -0.382343 | -1.264816 |
| N9  | 0.207086  | 1.820009  | -0.452374 |
| N10 | 1.564608  | 0.096380  | 1.377323  |
| C11 | 0.690153  | -2.749161 | 1.457236  |
| C12 | 0.327428  | -4.140845 | 1.510664  |
| C13 | -0.747958 | -4.289836 | 0.688783  |
| C14 | -1.019874 | -2.986643 | 0.125411  |
| C15 | -2.217905 | -1.506661 | -1.450358 |
| C16 | -3.270852 | -1.259876 | -2.415231 |
| C17 | -3.138757 | 0.036824  | -2.816729 |
| C18 | -2.016907 | 0.570716  | -2.061293 |
| C19 | -0.573293 | 2.462786  | -1.366719 |
| C20 | -0.194438 | 3.848862  | -1.457438 |
| C21 | 0.825621  | 4.047951  | -0.575840 |
| C22 | 1.075000  | 2.759101  | 0.053500  |
| C23 | 2.321725  | 1.219751  | 1.561350  |

|      |           |           |           |
|------|-----------|-----------|-----------|
| C24  | 3.362921  | 0.963247  | 2.534479  |
| C25  | 3.199039  | -0.321249 | 2.962589  |
| C26  | 2.107416  | -0.863702 | 2.188761  |
| C27  | 1.727465  | -2.196982 | 2.187646  |
| H28  | 2.310713  | -2.881056 | 2.788609  |
| C29  | -2.021050 | -2.717962 | -0.802663 |
| H30  | -2.697578 | -3.528874 | -1.042480 |
| C31  | -1.599019 | 1.895826  | -2.112343 |
| H32  | -2.097754 | 2.558047  | -2.807157 |
| C33  | 2.097223  | 2.446394  | 0.945876  |
| H34  | 2.823976  | 3.209995  | 1.172289  |
| C35  | 8.067858  | -1.477570 | -4.600244 |
| C36  | 8.827782  | -1.238981 | -5.784266 |
| C37  | 9.944016  | -1.973567 | -6.139357 |
| C38  | 10.432611 | -2.975558 | -5.302653 |
| C39  | 9.764058  | -3.201434 | -4.101728 |
| C40  | 8.621289  | -2.482420 | -3.755423 |
| C141 | 8.344515  | 0.038222  | -6.901260 |
| H42  | 10.400175 | -1.771216 | -7.098672 |
| H43  | 11.290159 | -3.572213 | -5.586997 |
| H44  | 10.105302 | -3.968334 | -3.418023 |
| C145 | 7.920104  | -2.920381 | -2.204599 |
| C46  | 3.932412  | -1.345132 | -1.450673 |
| C47  | 3.800910  | -1.906864 | -2.716997 |
| C48  | 4.765010  | -1.713060 | -3.715903 |
| C49  | 5.906315  | -0.969966 | -3.379611 |
| C50  | 6.027621  | -0.356823 | -2.129059 |
| C51  | 5.044618  | -0.547318 | -1.161374 |
| H52  | 3.175844  | -1.515814 | -0.699323 |
| H53  | 2.933185  | -2.514559 | -2.948566 |
| N54  | 6.936990  | -0.736512 | -4.363937 |
| H55  | 6.891079  | 0.264742  | -1.928371 |
| H56  | 5.134190  | -0.053570 | -0.199337 |
| H57  | 6.598930  | -0.217996 | -5.167328 |
| C58  | 4.505806  | -2.217188 | -5.116796 |
| H59  | 5.391781  | -2.100163 | -5.747480 |
| H60  | 3.733944  | -1.597011 | -5.584278 |
| C61  | 4.067728  | -3.689517 | -5.256914 |
| O62  | 3.437128  | -3.963691 | -6.310674 |
| O63  | 4.401429  | -4.497487 | -4.362244 |
| H64  | -1.392446 | -0.565307 | 3.664793  |
| H65  | 0.829471  | -4.890383 | 2.116773  |
| H66  | -1.280794 | -5.207904 | 0.460618  |
| H67  | -4.002353 | -2.029530 | -2.658359 |
| H68  | -3.672523 | 0.664839  | -3.541288 |
| H69  | -0.708661 | 4.580183  | -2.076298 |
| H70  | 1.281341  | 5.033480  | -0.439944 |
| H71  | 4.157978  | 1.653937  | 2.799272  |
| H72  | 3.702361  | -0.850442 | 3.775851  |

Diclofenac 5-1 Transition State Doublet

|     |           |           |           |
|-----|-----------|-----------|-----------|
| C1  | -1.881155 | -0.454791 | 2.693562  |
| S2  | -1.345465 | 0.800021  | 1.489352  |
| H3  | -2.906148 | -0.205811 | 2.995243  |
| H4  | -1.901203 | -1.432813 | 2.202417  |
| O5  | 1.384148  | -0.396004 | -1.374839 |
| Fe6 | 0.251163  | -0.167656 | -0.073636 |
| N7  | 0.039749  | -2.085265 | 0.489600  |
| N8  | -1.354666 | -0.380627 | -1.325587 |

|      |           |           |           |
|------|-----------|-----------|-----------|
| N9   | 0.277271  | 1.831539  | -0.471227 |
| N10  | 1.678512  | 0.062714  | 1.309757  |
| C11  | 0.818683  | -2.775955 | 1.392658  |
| C12  | 0.405546  | -4.151831 | 1.474407  |
| C13  | -0.654282 | -4.287370 | 0.629353  |
| C14  | -0.876151 | -2.996105 | 0.020533  |
| C15  | -2.100811 | -1.506395 | -1.519162 |
| C16  | -3.177550 | -1.249648 | -2.458308 |
| C17  | -3.062496 | 0.054837  | -2.838949 |
| C18  | -1.931256 | 0.585653  | -2.092875 |
| C19  | -0.510940 | 2.470706  | -1.381489 |
| C20  | -0.156000 | 3.863184  | -1.449501 |
| C21  | 0.843723  | 4.073423  | -0.549856 |
| C22  | 1.112613  | 2.775079  | 0.068697  |
| C23  | 2.388013  | 1.215007  | 1.536255  |
| C24  | 3.417661  | 0.962846  | 2.522878  |
| C25  | 3.274463  | -0.333667 | 2.931822  |
| C26  | 2.212192  | -0.889802 | 2.132489  |
| C27  | 1.836415  | -2.225776 | 2.145134  |
| H28  | 2.390838  | -2.899373 | 2.782722  |
| C29  | -1.882575 | -2.726134 | -0.896912 |
| H30  | -2.559711 | -3.535692 | -1.134718 |
| C31  | -1.533914 | 1.911623  | -2.128912 |
| H32  | -2.044663 | 2.579117  | -2.808876 |
| C33  | 2.129541  | 2.458116  | 0.970141  |
| H34  | 2.825315  | 3.233474  | 1.249480  |
| C35  | 7.330074  | -1.541523 | -4.130088 |
| C36  | 8.128835  | -1.336982 | -5.298015 |
| C37  | 9.321249  | -2.003490 | -5.538225 |
| C38  | 9.811987  | -2.931548 | -4.623229 |
| C39  | 9.044335  | -3.202396 | -3.490387 |
| C40  | 7.839004  | -2.542096 | -3.262007 |
| C141 | 7.612345  | -0.245091 | -6.575235 |
| H42  | 9.823760  | -1.824003 | -6.481010 |
| H43  | 10.728724 | -3.475453 | -4.820642 |
| H44  | 9.346838  | -3.968038 | -2.790705 |
| C145 | 6.956795  | -3.063709 | -1.844854 |
| C46  | 2.856499  | -1.604372 | -1.366290 |
| C47  | 2.928358  | -2.103653 | -2.702290 |
| C48  | 3.980128  | -1.809243 | -3.561598 |
| C49  | 5.067793  | -1.075215 | -3.049037 |
| C50  | 5.034256  | -0.560087 | -1.736534 |
| C51  | 3.970079  | -0.830866 | -0.900483 |
| H52  | 2.283984  | -2.180606 | -0.648052 |
| H53  | 2.131809  | -2.751429 | -3.053301 |
| N54  | 6.193631  | -0.778222 | -3.910823 |
| H55  | 5.868515  | 0.040761  | -1.389822 |
| H56  | 3.966753  | -0.450765 | 0.113960  |
| H57  | 5.912532  | -0.221519 | -4.712486 |
| C58  | 3.961310  | -2.309178 | -4.987767 |
| H59  | 4.882283  | -2.031919 | -5.508993 |
| H60  | 3.149908  | -1.841291 | -5.549730 |
| C61  | 3.832476  | -3.835766 | -5.138106 |
| O62  | 3.256608  | -4.228308 | -6.183863 |
| O63  | 4.336053  | -4.558651 | -4.252455 |
| H64  | -1.291231 | -0.587997 | 3.608595  |
| H65  | 0.867150  | -4.905347 | 2.108416  |
| H66  | -1.236326 | -5.184655 | 0.434728  |
| H67  | -3.920115 | -2.010516 | -2.691687 |
| H68  | -3.608731 | 0.688690  | -3.551996 |



|     |           |           |           |
|-----|-----------|-----------|-----------|
| H69 | -0.683512 | 4.575310  | -2.080436 |
| H70 | 1.271660  | 5.067171  | -0.407480 |
| H71 | 4.192411  | 1.670725  | 2.798285  |
| H72 | 3.757068  | -0.876211 | 3.748924  |

Diclofenac 5-2 Reactant Complex Doublet

|      |           |           |           |
|------|-----------|-----------|-----------|
| C1   | -1.962277 | -0.533220 | 3.076824  |
| S2   | -1.364561 | 0.570791  | 1.754001  |
| H3   | -3.008006 | -0.262256 | 3.270994  |
| H4   | -1.942094 | -1.566238 | 2.718446  |
| O5   | 0.869236  | -1.026233 | -1.334815 |
| Fe6  | -0.069307 | -0.532072 | -0.085555 |
| N7   | -0.364287 | -2.395411 | 0.648083  |
| N8   | -1.778255 | -0.702723 | -1.159343 |
| N9   | 0.098105  | 1.422053  | -0.626088 |
| N10  | 1.482783  | -0.304757 | 1.174864  |
| C11  | 0.498122  | -3.104727 | 1.441701  |
| C12  | 0.092712  | -4.483284 | 1.539148  |
| C13  | -1.054307 | -4.594843 | 0.812164  |
| C14  | -1.321169 | -3.289766 | 0.251082  |
| C15  | -2.574408 | -1.801219 | -1.269562 |
| C16  | -3.655356 | -1.557536 | -2.201822 |
| C17  | -3.485834 | -0.293753 | -2.678952 |
| C18  | -2.313768 | 0.229905  | -1.995538 |
| C19  | -0.732960 | 2.064898  | -1.489511 |
| C20  | -0.282319 | 3.414829  | -1.704587 |
| C21  | 0.864162  | 3.581389  | -0.985281 |
| C22  | 1.087445  | 2.317350  | -0.288382 |
| C23  | 2.278476  | 0.798919  | 1.285587  |
| C24  | 3.354091  | 0.542302  | 2.220215  |
| C25  | 3.180686  | -0.731074 | 2.682343  |
| C26  | 2.031129  | -1.257637 | 1.993583  |
| C27  | 1.602648  | -2.570857 | 2.081459  |
| H28  | 2.195104  | -3.252092 | 2.676245  |
| C29  | -2.369765 | -3.005802 | -0.609089 |
| H30  | -3.070101 | -3.803837 | -0.805876 |
| C31  | -1.838077 | 1.522296  | -2.129927 |
| H32  | -2.338394 | 2.170249  | -2.837455 |
| C33  | 2.100505  | 2.002643  | 0.611492  |
| H34  | 2.850082  | 2.744657  | 0.832881  |
| C35  | 7.459000  | -3.556934 | -2.881559 |
| C36  | 8.129338  | -2.571195 | -2.131222 |
| C37  | 9.281386  | -2.847743 | -1.402201 |
| C38  | 9.827885  | -4.131004 | -1.437564 |
| C39  | 9.211150  | -5.131029 | -2.190484 |
| C40  | 8.032858  | -4.841686 | -2.875846 |
| Cl41 | 7.486216  | -0.949079 | -2.084601 |
| H42  | 9.730652  | -2.067779 | -0.803555 |
| H43  | 10.724436 | -4.353112 | -0.871334 |
| H44  | 9.611843  | -6.137474 | -2.217920 |
| Cl45 | 7.213032  | -6.156607 | -3.706656 |
| C46  | 2.599731  | -3.345447 | -1.474560 |
| C47  | 2.648141  | -3.116347 | -2.854233 |
| C48  | 3.848791  | -3.034411 | -3.557525 |
| C49  | 5.050473  | -3.246321 | -2.839152 |
| C50  | 5.006644  | -3.427682 | -1.447899 |
| C51  | 3.790397  | -3.465989 | -0.767252 |
| H52  | 1.645520  | -3.386988 | -0.968777 |
| H53  | 1.725402  | -2.976084 | -3.398909 |

|     |           |           |           |
|-----|-----------|-----------|-----------|
| N54 | 6.258377  | -3.276872 | -3.544298 |
| H55 | 5.932895  | -3.534119 | -0.901758 |
| H56 | 3.780036  | -3.583001 | 0.312126  |
| H57 | 6.173519  | -3.589448 | -4.520638 |
| C58 | 3.834402  | -2.629650 | -5.025010 |
| H59 | 4.512366  | -1.779888 | -5.156244 |
| H60 | 2.827325  | -2.309374 | -5.283624 |
| C61 | 4.269298  | -3.698554 | -6.048182 |
| O62 | 5.509468  | -3.970827 | -6.095106 |
| O63 | 3.387918  | -4.204585 | -6.763010 |
| H64 | -1.452730 | -0.533589 | 4.056741  |
| H65 | 0.622425  | -5.256721 | 2.095618  |
| H66 | -1.654177 | -5.480079 | 0.639086  |
| H67 | -4.409467 | -2.309694 | -2.408718 |
| H68 | -4.029369 | 0.310981  | -3.414994 |
| H69 | -0.827227 | 4.137916  | -2.311331 |
| H70 | 1.407981  | 4.532796  | -1.030506 |
| H71 | 4.167532  | 1.235156  | 2.409173  |
| H72 | 3.735786  | -1.302401 | 3.423090  |

Diclofenac 5-2 Transition State Doublet

|     |           |           |           |
|-----|-----------|-----------|-----------|
| C1  | -1.906490 | -0.568940 | 2.970981  |
| S2  | -1.300869 | 0.523515  | 1.626779  |
| H3  | -2.961641 | -0.318150 | 3.133021  |
| H4  | -1.853112 | -1.608711 | 2.634722  |
| O5  | 1.084370  | -0.944788 | -1.382439 |
| Fe6 | 0.022700  | -0.587822 | -0.070961 |
| N7  | -0.263330 | -2.449450 | 0.602196  |
| N8  | -1.675254 | -0.773742 | -1.215193 |
| N9  | 0.183566  | 1.366492  | -0.667503 |
| N10 | 1.552996  | -0.365569 | 1.177059  |
| C11 | 0.561877  | -3.151255 | 1.452793  |
| C12 | 0.137673  | -4.525528 | 1.544276  |
| C13 | -0.994862 | -4.632476 | 0.794554  |
| C14 | -1.237806 | -3.337981 | 0.206240  |
| C15 | -2.490074 | -1.859112 | -1.307665 |
| C16 | -3.590865 | -1.598850 | -2.215644 |
| C17 | -3.415864 | -0.335469 | -2.693311 |
| C18 | -2.221417 | 0.172347  | -2.035600 |
| C19 | -0.656793 | 2.003238  | -1.527779 |
| C20 | -0.229060 | 3.364569  | -1.717409 |
| C21 | 0.909787  | 3.540326  | -0.989386 |
| C22 | 1.152650  | 2.267184  | -0.306935 |
| C23 | 2.330724  | 0.752353  | 1.280302  |
| C24 | 3.389260  | 0.511006  | 2.234486  |
| C25 | 3.208648  | -0.753863 | 2.720701  |
| C26 | 2.063058  | -1.293408 | 2.036220  |
| C27 | 1.627880  | -2.610427 | 2.142818  |
| H28 | 2.191185  | -3.281358 | 2.777827  |
| C29 | -2.291381 | -3.063595 | -0.647890 |
| H30 | -3.003010 | -3.854694 | -0.827414 |
| C31 | -1.756790 | 1.463929  | -2.173124 |
| H32 | -2.261416 | 2.108452  | -2.875308 |
| C33 | 2.154013  | 1.959814  | 0.609694  |
| H34 | 2.888797  | 2.711317  | 0.846462  |
| C35 | 7.119821  | -3.521778 | -2.684523 |
| C36 | 7.876694  | -2.519626 | -2.050138 |
| C37 | 9.080561  | -2.795675 | -1.407531 |
| C38 | 9.601067  | -4.084458 | -1.433540 |

|      |           |           |           |
|------|-----------|-----------|-----------|
| C39  | 8.911735  | -5.096932 | -2.101768 |
| C40  | 7.688572  | -4.811742 | -2.703848 |
| C141 | 7.333665  | -0.866002 | -2.082873 |
| H42  | 9.597365  | -1.995472 | -0.893533 |
| H43  | 10.541117 | -4.302226 | -0.937974 |
| H44  | 9.301204  | -6.106577 | -2.141746 |
| C145 | 6.841427  | -6.128860 | -3.489875 |
| C46  | 2.182546  | -2.606184 | -1.479974 |
| C47  | 2.328106  | -2.743879 | -2.895915 |
| C48  | 3.538413  | -2.796039 | -3.541683 |
| C49  | 4.726208  | -2.899653 | -2.732299 |
| C50  | 4.616267  | -2.654632 | -1.333019 |
| C51  | 3.395181  | -2.486405 | -0.729070 |
| H52  | 1.310735  | -3.026138 | -0.991595 |
| H53  | 1.433264  | -2.798757 | -3.493650 |
| N54  | 5.891732  | -3.264101 | -3.330805 |
| H55  | 5.519012  | -2.623642 | -0.737725 |
| H56  | 3.354376  | -2.320212 | 0.336021  |
| H57  | 5.812787  | -3.582189 | -4.327665 |
| C58  | 3.579458  | -2.611764 | -5.053421 |
| H59  | 4.193272  | -1.725464 | -5.254694 |
| H60  | 2.568787  | -2.391057 | -5.387319 |
| C61  | 4.131902  | -3.727011 | -5.960755 |
| O62  | 5.367649  | -4.017908 | -5.837576 |
| O63  | 3.350044  | -4.232755 | -6.775853 |
| H64  | -1.430568 | -0.549330 | 3.977821  |
| H65  | 0.652061  | -5.302400 | 2.106204  |
| H66  | -1.625462 | -5.502239 | 0.629475  |
| H67  | -4.380051 | -2.319441 | -2.404874 |
| H68  | -3.975601 | 0.281181  | -3.412491 |
| H69  | -0.795079 | 4.097874  | -2.292547 |
| H70  | 1.428684  | 4.502240  | -1.023246 |
| H71  | 4.185870  | 1.222304  | 2.423710  |
| H72  | 3.762539  | -1.318763 | 3.461927  |

Diclofenac 5-3 Reactant Complex Doublet

|     |           |           |           |
|-----|-----------|-----------|-----------|
| C1  | -1.990740 | -0.456018 | 3.063474  |
| S2  | -1.444640 | 0.685512  | 1.748752  |
| H3  | -3.052457 | -0.241437 | 3.237970  |
| H4  | -1.908220 | -1.483967 | 2.701058  |
| O5  | 0.950113  | -0.846621 | -1.252394 |
| Fe6 | -0.062636 | -0.361225 | -0.059272 |
| N7  | -0.328564 | -2.230263 | 0.658367  |
| N8  | -1.740391 | -0.572748 | -1.170573 |
| N9  | 0.067785  | 1.596887  | -0.598730 |
| N10 | 1.426287  | -0.074824 | 1.261759  |
| C11 | 0.538093  | -2.910444 | 1.472206  |
| C12 | 0.188432  | -4.305107 | 1.539662  |
| C13 | -0.933103 | -4.454738 | 0.782854  |
| C14 | -1.242146 | -3.157316 | 0.231832  |
| C15 | -2.530436 | -1.676915 | -1.266001 |
| C16 | -3.627848 | -1.442226 | -2.179593 |
| C17 | -3.464251 | -0.186545 | -2.678545 |
| C18 | -2.292757 | 0.349823  | -2.007246 |
| C19 | -0.753978 | 2.214182  | -1.487824 |
| C20 | -0.337722 | 3.573944  | -1.698619 |
| C21 | 0.779210  | 3.780902  | -0.946069 |
| C22 | 1.017966  | 2.525543  | -0.235788 |
| C23 | 2.177695  | 1.056793  | 1.404169  |

|      |           |           |           |
|------|-----------|-----------|-----------|
| C24  | 3.211655  | 0.840754  | 2.392036  |
| C25  | 3.065103  | -0.436709 | 2.849663  |
| C26  | 1.969461  | -1.006897 | 2.109264  |
| C27  | 1.585515  | -2.334276 | 2.170018  |
| H28  | 2.163669  | -2.993644 | 2.805640  |
| C29  | -2.302538 | -2.888368 | -0.624844 |
| H30  | -2.993991 | -3.694678 | -0.835101 |
| C31  | -1.835298 | 1.650548  | -2.150314 |
| H32  | -2.332581 | 2.292685  | -2.863846 |
| C33  | 1.997296  | 2.249331  | 0.710580  |
| H34  | 2.701954  | 3.022457  | 0.970774  |
| C35  | 7.518740  | -3.373633 | -2.809273 |
| C36  | 8.158573  | -2.392860 | -2.025726 |
| C37  | 9.315557  | -2.658546 | -1.300843 |
| C38  | 9.899923  | -3.922539 | -1.373322 |
| C39  | 9.310369  | -4.918492 | -2.152385 |
| C40  | 8.122914  | -4.643196 | -2.830041 |
| C141 | 7.480720  | -0.786595 | -1.941993 |
| H42  | 9.743523  | -1.884177 | -0.678474 |
| H43  | 10.805109 | -4.133405 | -0.815367 |
| H44  | 9.735620  | -5.914810 | -2.202714 |
| C145 | 7.327569  | -5.966065 | -3.667801 |
| C46  | 2.632983  | -3.198584 | -1.457841 |
| C47  | 2.701037  | -2.917373 | -2.825218 |
| C48  | 3.907819  | -2.854481 | -3.520654 |
| C49  | 5.098920  | -3.117304 | -2.803889 |
| C50  | 5.034112  | -3.404656 | -1.432810 |
| C51  | 3.812633  | -3.433688 | -0.760643 |
| H52  | 1.672448  | -3.221930 | -0.960659 |
| H53  | 1.785755  | -2.735503 | -3.370627 |
| N54  | 6.322519  | -3.101992 | -3.485461 |
| H55  | 5.950590  | -3.625983 | -0.904297 |
| H56  | 3.793245  | -3.647170 | 0.303458  |
| H57  | 6.262275  | -3.396176 | -4.468452 |
| C58  | 3.914468  | -2.442200 | -4.986336 |
| H59  | 4.600295  | -1.597071 | -5.102842 |
| H60  | 2.912439  | -2.117407 | -5.262225 |
| C61  | 4.354715  | -3.530564 | -5.989535 |
| O62  | 5.601154  | -3.772598 | -6.056242 |
| O63  | 3.475238  | -4.091475 | -6.665429 |
| H64  | -1.497234 | -0.428838 | 4.057057  |
| H65  | 0.743549  | -5.061556 | 2.093522  |
| H66  | -1.488832 | -5.361842 | 0.582092  |
| H67  | -4.420814 | -2.170858 | -2.287314 |
| H68  | -4.003521 | 0.401923  | -3.430188 |
| H69  | -0.888303 | 4.249508  | -2.350403 |
| H70  | 1.299319  | 4.748278  | -0.974193 |
| H71  | 3.995304  | 1.562714  | 2.597158  |
| H72  | 3.622338  | -0.994852 | 3.600932  |

Diclofenac 5-3 Reactant Complex Quartet

|     |           |           |           |
|-----|-----------|-----------|-----------|
| C1  | -2.040494 | -0.463863 | 3.089597  |
| S2  | -1.420871 | 0.671609  | 1.798641  |
| H3  | -3.106274 | -0.229241 | 3.219527  |
| H4  | -1.964757 | -1.497525 | 2.729640  |
| O5  | 0.961599  | -0.832522 | -1.282581 |
| Fe6 | -0.042046 | -0.320490 | -0.110780 |
| N7  | -0.302887 | -2.175247 | 0.616938  |
| N8  | -1.730618 | -0.540246 | -1.206276 |

|     |           |           |           |
|-----|-----------|-----------|-----------|
| N9  | 0.050899  | 1.647361  | -0.633349 |
| N10 | 1.427951  | -0.004619 | 1.215190  |
| C11 | 0.582249  | -2.853302 | 1.414463  |
| C12 | 0.245962  | -4.249322 | 1.482647  |
| C13 | -0.891545 | -4.405002 | 0.747219  |
| C14 | -1.215028 | -3.110761 | 0.198053  |
| C15 | -2.520625 | -1.650952 | -1.307410 |
| C16 | -3.616250 | -1.417192 | -2.226191 |
| C17 | -3.450456 | -0.157836 | -2.724331 |
| C18 | -2.288635 | 0.379750  | -2.046008 |
| C19 | -0.785010 | 2.266293  | -1.514060 |
| C20 | -0.401337 | 3.636192  | -1.708692 |
| C21 | 0.716799  | 3.855269  | -0.956569 |
| C22 | 0.983923  | 2.597040  | -0.265233 |
| C23 | 2.156434  | 1.142521  | 1.378225  |
| C24 | 3.175073  | 0.944177  | 2.382775  |
| C25 | 3.050047  | -0.341194 | 2.830650  |
| C26 | 1.982942  | -0.929635 | 2.064833  |
| C27 | 1.628656  | -2.268252 | 2.108763  |
| H28 | 2.225488  | -2.923926 | 2.733063  |
| C29 | -2.281532 | -2.855239 | -0.656088 |
| H30 | -2.960753 | -3.676239 | -0.858139 |
| C31 | -1.856203 | 1.688691  | -2.179183 |
| H32 | -2.373275 | 2.323854  | -2.887864 |
| C33 | 1.963523  | 2.336145  | 0.687108  |
| H34 | 2.654791  | 3.124640  | 0.951175  |
| C35 | 7.627246  | -3.799713 | -2.715260 |
| C36 | 8.204653  | -2.715704 | -2.009391 |
| C37 | 9.415770  | -2.831212 | -1.330986 |
| C38 | 10.125605 | -4.031683 | -1.383433 |
| C39 | 9.617650  | -5.114478 | -2.103521 |
| C40 | 8.377470  | -4.996299 | -2.732307 |
| C41 | 7.405949  | -1.163009 | -2.025863 |
| H42 | 9.799325  | -1.978920 | -0.781557 |
| H43 | 11.071925 | -4.127517 | -0.857730 |
| H44 | 10.154940 | -6.056788 | -2.150075 |
| C45 | 7.716227  | -6.409558 | -3.542544 |
| C46 | 2.758790  | -2.991573 | -1.392797 |
| C47 | 2.932460  | -2.636712 | -2.732698 |
| C48 | 4.126328  | -2.843045 | -3.423713 |
| C49 | 5.200515  | -3.447733 | -2.727345 |
| C50 | 5.028091  | -3.830497 | -1.386575 |
| C51 | 3.825211  | -3.597121 | -0.723226 |
| H52 | 1.811802  | -2.818554 | -0.901043 |
| H53 | 2.119305  | -2.144857 | -3.247946 |
| N54 | 6.412985  | -3.688122 | -3.377754 |
| H55 | 5.846789  | -4.342652 | -0.888428 |
| H56 | 3.716657  | -3.908313 | 0.313331  |
| H57 | 6.396716  | -3.748319 | -4.412345 |
| C58 | 4.281740  | -2.324428 | -4.840722 |
| H59 | 5.089400  | -1.583321 | -4.832312 |
| H60 | 3.354399  | -1.824383 | -5.133080 |
| C61 | 4.632244  | -3.373264 | -5.925157 |
| O62 | 5.879070  | -3.645189 | -6.062250 |
| O63 | 3.702407  | -3.877745 | -6.583406 |
| H64 | -1.588811 | -0.449025 | 4.109330  |
| H65 | 0.805389  | -5.002821 | 2.031434  |
| H66 | -1.443363 | -5.319860 | 0.569054  |
| H67 | -4.428439 | -2.118630 | -2.379273 |
| H68 | -3.990291 | 0.423575  | -3.482279 |

|     |           |           |           |
|-----|-----------|-----------|-----------|
| H69 | -0.961958 | 4.327161  | -2.337505 |
| H70 | 1.203781  | 4.837245  | -0.981781 |
| H71 | 3.936885  | 1.684416  | 2.606447  |
| H72 | 3.606637  | -0.887968 | 3.590639  |

Diclofenac 5-3 Transition State Doublet

|      |           |           |           |
|------|-----------|-----------|-----------|
| C1   | -1.925955 | -0.490328 | 2.969260  |
| S2   | -1.356181 | 0.641186  | 1.639306  |
| H3   | -2.995994 | -0.299170 | 3.110787  |
| H4   | -1.807510 | -1.523193 | 2.630413  |
| O5   | 1.125369  | -0.779116 | -1.322953 |
| Fe6  | 0.037688  | -0.418083 | -0.041215 |
| N7   | -0.217316 | -2.278806 | 0.630665  |
| N8   | -1.639716 | -0.635391 | -1.200867 |
| N9   | 0.164904  | 1.541162  | -0.633788 |
| N10  | 1.531330  | -0.144623 | 1.243625  |
| C11  | 0.621090  | -2.955409 | 1.488174  |
| C12  | 0.259276  | -4.347411 | 1.545733  |
| C13  | -0.851368 | -4.493988 | 0.768770  |
| C14  | -1.146272 | -3.201935 | 0.201266  |
| C15  | -2.438713 | -1.732502 | -1.286887 |
| C16  | -3.553265 | -1.483383 | -2.180195 |
| C17  | -3.393035 | -0.225718 | -2.671412 |
| C18  | -2.205445 | 0.303512  | -2.020293 |
| C19  | -0.672439 | 2.152484  | -1.514731 |
| C20  | -0.277001 | 3.521952  | -1.707294 |
| C21  | 0.833498  | 3.738960  | -0.949283 |
| C22  | 1.097607  | 2.474623  | -0.254841 |
| C23  | 2.259824  | 1.001925  | 1.378101  |
| C24  | 3.274433  | 0.807829  | 2.386779  |
| C25  | 3.121531  | -0.461342 | 2.872018  |
| C26  | 2.036474  | -1.048829 | 2.130422  |
| C27  | 1.644104  | -2.380941 | 2.217783  |
| H28  | 2.205788  | -3.033817 | 2.872314  |
| C29  | -2.208381 | -2.944613 | -0.651121 |
| H30  | -2.899101 | -3.752078 | -0.855888 |
| C31  | -1.758281 | 1.598362  | -2.165674 |
| H32  | -2.268798 | 2.246235  | -2.865340 |
| C33  | 2.076132  | 2.200217  | 0.692204  |
| H34  | 2.782333  | 2.971829  | 0.952987  |
| C35  | 7.164659  | -3.318548 | -2.576593 |
| C36  | 7.893095  | -2.313422 | -1.915746 |
| C37  | 9.096120  | -2.572012 | -1.264036 |
| C38  | 9.651026  | -3.847134 | -1.314903 |
| C39  | 8.994858  | -4.858195 | -2.013733 |
| C40  | 7.769242  | -4.593319 | -2.620489 |
| Cl41 | 7.328247  | -0.667930 | -1.936564 |
| H42  | 9.585902  | -1.769989 | -0.730608 |
| H43  | 10.594167 | -4.050235 | -0.819002 |
| H44  | 9.409750  | -5.857623 | -2.076964 |
| Cl45 | 6.975259  | -5.917641 | -3.442281 |
| C46  | 2.187792  | -2.464504 | -1.441922 |
| C47  | 2.356017  | -2.611150 | -2.855458 |
| C48  | 3.581033  | -2.640724 | -3.477728 |
| C49  | 4.756449  | -2.729592 | -2.648744 |
| C50  | 4.617878  | -2.489732 | -1.252771 |
| C51  | 3.385508  | -2.335330 | -0.669826 |
| H52  | 1.305864  | -2.878796 | -0.970692 |
| H53  | 1.471731  | -2.702035 | -3.466262 |

|     |           |           |           |
|-----|-----------|-----------|-----------|
| N54 | 5.938185  | -3.078656 | -3.232377 |
| H55 | 5.510972  | -2.443189 | -0.642021 |
| H56 | 3.319095  | -2.163124 | 0.394063  |
| H57 | 5.882345  | -3.388989 | -4.230547 |
| C58 | 3.653991  | -2.451645 | -4.987969 |
| H59 | 4.275110  | -1.566267 | -5.171377 |
| H60 | 2.650810  | -2.229380 | -5.341723 |
| C61 | 4.227329  | -3.571409 | -5.878926 |
| O62 | 5.469881  | -3.823866 | -5.764707 |
| O63 | 3.448659  | -4.123040 | -6.669721 |
| H64 | -1.467693 | -0.445705 | 3.985381  |
| H65 | 0.797650  | -5.105829 | 2.109884  |
| H66 | -1.432041 | -5.391866 | 0.579680  |
| H67 | -4.370856 | -2.186479 | -2.280960 |
| H68 | -3.948863 | 0.371200  | -3.408110 |
| H69 | -0.856980 | 4.198683  | -2.333315 |
| H70 | 1.320738  | 4.719064  | -0.959670 |
| H71 | 4.023575  | 1.559692  | 2.605907  |
| H72 | 3.666433  | -1.002296 | 3.638807  |

Diclofenac 5-3 Transition State Quartet

|     |           |           |           |
|-----|-----------|-----------|-----------|
| C1  | -1.943098 | -0.504869 | 2.981689  |
| S2  | -1.329603 | 0.614728  | 1.664592  |
| H3  | -3.012821 | -0.299781 | 3.099030  |
| H4  | -1.829308 | -1.539213 | 2.643709  |
| O5  | 1.179185  | -1.051355 | -1.254919 |
| Fe6 | 0.061175  | -0.392031 | -0.106848 |
| N7  | -0.254029 | -2.247402 | 0.639118  |
| N8  | -1.623519 | -0.613048 | -1.250083 |
| N9  | 0.187814  | 1.538115  | -0.686061 |
| N10 | 1.554665  | -0.108212 | 1.192096  |
| C11 | 0.602809  | -2.919295 | 1.472063  |
| C12 | 0.245568  | -4.312834 | 1.536234  |
| C13 | -0.869859 | -4.462091 | 0.766178  |
| C14 | -1.169250 | -3.168117 | 0.202494  |
| C15 | -2.437769 | -1.708083 | -1.315814 |
| C16 | -3.554721 | -1.455363 | -2.206168 |
| C17 | -3.386951 | -0.202074 | -2.707760 |
| C18 | -2.191973 | 0.321008  | -2.069247 |
| C19 | -0.662016 | 2.161972  | -1.556039 |
| C20 | -0.286673 | 3.535962  | -1.719763 |
| C21 | 0.822601  | 3.755579  | -0.958286 |
| C22 | 1.104168  | 2.490720  | -0.283883 |
| C23 | 2.271321  | 1.035830  | 1.349254  |
| C24 | 3.271544  | 0.843762  | 2.373484  |
| C25 | 3.124423  | -0.432051 | 2.842280  |
| C26 | 2.052793  | -1.021107 | 2.076927  |
| C27 | 1.642834  | -2.342690 | 2.180821  |
| H28 | 2.202439  | -2.993347 | 2.839448  |
| C29 | -2.225382 | -2.911166 | -0.663122 |
| H30 | -2.920943 | -3.715525 | -0.861769 |
| C31 | -1.746737 | 1.616939  | -2.214775 |
| H32 | -2.259759 | 2.268338  | -2.908074 |
| C33 | 2.077944  | 2.236525  | 0.671438  |
| H34 | 2.756137  | 3.025121  | 0.951421  |
| C35 | 7.227014  | -3.415213 | -2.601691 |
| C36 | 7.927804  | -2.404818 | -1.916468 |
| C37 | 9.139986  | -2.643506 | -1.274210 |
| C38 | 9.730391  | -3.901697 | -1.356347 |

|      |           |           |           |
|------|-----------|-----------|-----------|
| C39  | 9.102232  | -4.915533 | -2.078119 |
| C40  | 7.866966  | -4.671073 | -2.675564 |
| C141 | 7.311371  | -0.776115 | -1.912624 |
| H42  | 9.611958  | -1.839736 | -0.725335 |
| H43  | 10.679057 | -4.091455 | -0.864519 |
| H44  | 9.545697  | -5.900827 | -2.163422 |
| C145 | 7.104328  | -5.998592 | -3.525115 |
| C46  | 2.186132  | -2.644543 | -1.499074 |
| C47  | 2.406998  | -2.671068 | -2.919577 |
| C48  | 3.651198  | -2.686164 | -3.506611 |
| C49  | 4.803013  | -2.869373 | -2.667629 |
| C50  | 4.624795  | -2.782649 | -1.259109 |
| C51  | 3.379653  | -2.660645 | -0.693069 |
| H52  | 1.306711  | -3.132964 | -1.099934 |
| H53  | 1.544589  | -2.704275 | -3.565173 |
| N54  | 6.001124  | -3.181955 | -3.254827 |
| H55  | 5.498292  | -2.861799 | -0.624809 |
| H56  | 3.282417  | -2.644017 | 0.383046  |
| H57  | 5.963280  | -3.449720 | -4.262180 |
| C58  | 3.782615  | -2.414190 | -4.998876 |
| H59  | 4.469491  | -1.568961 | -5.112895 |
| H60  | 2.808516  | -2.107328 | -5.372321 |
| C61  | 4.308189  | -3.533917 | -5.918667 |
| O62  | 5.550845  | -3.806144 | -5.842830 |
| O63  | 3.496514  | -4.070492 | -6.682925 |
| H64  | -1.500518 | -0.461883 | 4.006131  |
| H65  | 0.792490  | -5.070713 | 2.093556  |
| H66  | -1.442446 | -5.362385 | 0.571169  |
| H67  | -4.384328 | -2.144867 | -2.313834 |
| H68  | -3.946425 | 0.392272  | -3.444368 |
| H69  | -0.872688 | 4.222177  | -2.330041 |
| H70  | 1.298757  | 4.743005  | -0.961578 |
| H71  | 4.006244  | 1.604778  | 2.607770  |
| H72  | 3.664733  | -0.975650 | 3.613697  |

Ibuprofen 2-1 Reactant Complex Doublet

|     |          |           |           |
|-----|----------|-----------|-----------|
| C1  | 6.478607 | 21.213755 | -2.447482 |
| S2  | 6.322747 | 22.250017 | -0.940983 |
| H3  | 5.984092 | 20.267559 | -2.200825 |
| H4  | 5.939922 | 21.677935 | -3.273212 |
| O5  | 5.598610 | 26.353632 | -1.551186 |
| Fe6 | 5.757644 | 24.744793 | -1.287494 |
| N7  | 5.534308 | 24.211997 | -3.212131 |
| N8  | 3.781812 | 24.448528 | -0.961266 |
| N9  | 6.045890 | 24.916483 | 0.724290  |
| N10 | 7.755040 | 24.775349 | -1.545664 |
| C11 | 6.507528 | 24.137003 | -4.172946 |
| C12 | 5.925963 | 23.829871 | -5.456233 |
| C13 | 4.582955 | 23.749711 | -5.259559 |
| C14 | 4.346096 | 23.978719 | -3.853449 |
| C15 | 2.831554 | 24.200370 | -1.908217 |
| C16 | 1.511718 | 24.178072 | -1.309952 |
| C17 | 1.680762 | 24.422289 | 0.021952  |
| C18 | 3.106784 | 24.596359 | 0.217317  |
| C19 | 5.059647 | 24.987016 | 1.665922  |
| C20 | 5.621187 | 25.235276 | 2.966747  |
| C21 | 6.969017 | 25.324227 | 2.815429  |
| C22 | 7.223570 | 25.152811 | 1.394045  |
| C23 | 8.685869 | 25.106972 | -0.599198 |



|     |           |           |           |
|-----|-----------|-----------|-----------|
| C24 | 9.989572  | 25.224445 | -1.204399 |
| C25 | 9.838006  | 24.950566 | -2.529252 |
| C26 | 8.435141  | 24.683134 | -2.736425 |
| C27 | 7.855937  | 24.383555 | -3.958247 |
| H28 | 8.504137  | 24.358281 | -4.825995 |
| C29 | 3.093456  | 23.981424 | -3.256469 |
| H30 | 2.249419  | 23.790991 | -3.904088 |
| C31 | 3.699127  | 24.854977 | 1.442612  |
| H32 | 3.062345  | 24.989067 | 2.308095  |
| C33 | 8.446352  | 25.288907 | 0.752852  |
| H34 | 9.303253  | 25.601299 | 1.332062  |
| C35 | 7.642458  | 30.443615 | -4.371429 |
| C36 | 8.519813  | 30.381910 | -3.284813 |
| C37 | 8.934332  | 31.541211 | -2.629168 |
| C38 | 8.469696  | 32.800177 | -3.025165 |
| C39 | 7.587124  | 32.865350 | -4.108236 |
| C40 | 7.188756  | 31.704896 | -4.776840 |
| H41 | 6.506638  | 31.775091 | -5.618494 |
| H42 | 7.182011  | 33.817672 | -4.423741 |
| H43 | 9.604011  | 31.464864 | -1.778199 |
| H44 | 8.878095  | 29.412815 | -2.955400 |
| C45 | 8.881791  | 34.026524 | -2.231889 |
| C46 | 10.025987 | 34.862495 | -2.841194 |
| O47 | 10.123505 | 35.101816 | -4.052291 |
| O48 | 10.860449 | 35.331253 | -1.987242 |
| H49 | 9.260882  | 33.674032 | -1.268486 |
| C50 | 7.685074  | 34.956311 | -1.928310 |
| H51 | 7.250127  | 35.345556 | -2.850296 |
| H52 | 8.007674  | 35.796598 | -1.309716 |
| H53 | 6.911623  | 34.393000 | -1.397971 |
| C54 | 7.136884  | 29.181082 | -5.021208 |
| C55 | 6.167264  | 28.375027 | -4.126762 |
| C56 | 5.017926  | 29.243115 | -3.606025 |
| C57 | 5.615658  | 27.187624 | -4.918907 |
| H58 | 4.987032  | 27.540652 | -5.746373 |
| H59 | 5.014325  | 26.550296 | -4.269739 |
| H60 | 6.420358  | 26.582507 | -5.342250 |
| H61 | 4.446671  | 29.658687 | -4.445778 |
| H62 | 5.376473  | 30.075138 | -2.993893 |
| H63 | 4.341997  | 28.634600 | -3.001120 |
| H64 | 6.722506  | 27.987875 | -3.266099 |
| H65 | 7.977280  | 28.530092 | -5.292584 |
| H66 | 6.613391  | 29.436583 | -5.949592 |
| H67 | 7.496868  | 20.947737 | -2.821593 |
| H68 | 6.470299  | 23.752692 | -6.397809 |
| H69 | 3.798080  | 23.607640 | -5.996702 |
| H70 | 0.602734  | 23.980808 | -1.871825 |
| H71 | 0.983934  | 24.472097 | 0.872391  |
| H72 | 5.032108  | 25.290067 | 3.878152  |
| H73 | 7.638414  | 25.464067 | 3.668508  |
| H74 | 10.873999 | 25.507810 | -0.642752 |
| H75 | 10.568689 | 24.936944 | -3.323831 |

Ibuprofen 2-1 Reactant Complex Quartet

|    |          |           |           |
|----|----------|-----------|-----------|
| C1 | 6.477402 | 21.196217 | -2.434499 |
| S2 | 6.323035 | 22.224826 | -0.902000 |
| H3 | 5.975378 | 20.240225 | -2.218024 |
| H4 | 5.939165 | 21.684476 | -3.254702 |
| O5 | 5.571041 | 26.373222 | -1.554832 |

|     |           |           |           |
|-----|-----------|-----------|-----------|
| Fe6 | 5.747520  | 24.798709 | -1.289157 |
| N7  | 5.528118  | 24.217390 | -3.218069 |
| N8  | 3.763716  | 24.468916 | -0.958134 |
| N9  | 6.039612  | 24.943959 | 0.737209  |
| N10 | 7.757913  | 24.779040 | -1.541943 |
| C11 | 6.494887  | 24.142793 | -4.172392 |
| C12 | 5.916894  | 23.838782 | -5.454980 |
| C13 | 4.580347  | 23.759282 | -5.258561 |
| C14 | 4.347435  | 23.989345 | -3.856066 |
| C15 | 2.822751  | 24.218141 | -1.897999 |
| C16 | 1.506088  | 24.184139 | -1.303457 |
| C17 | 1.673369  | 24.425655 | 0.022767  |
| C18 | 3.096174  | 24.608115 | 0.213287  |
| C19 | 5.059589  | 25.003931 | 1.673974  |
| C20 | 5.619865  | 25.237708 | 2.974289  |
| C21 | 6.962526  | 25.325417 | 2.823028  |
| C22 | 7.211947  | 25.164391 | 1.404349  |
| C23 | 8.684682  | 25.104839 | -0.601243 |
| C24 | 9.986019  | 25.221064 | -1.201236 |
| C25 | 9.835145  | 24.951497 | -2.522656 |
| C26 | 8.434667  | 24.685916 | -2.727023 |
| C27 | 7.858681  | 24.388675 | -3.964973 |
| H28 | 8.505994  | 24.368903 | -4.835280 |
| C29 | 3.077952  | 23.992287 | -3.262255 |
| H30 | 2.234073  | 23.796912 | -3.909245 |
| C31 | 3.686079  | 24.864945 | 1.457779  |
| H32 | 3.048738  | 24.987398 | 2.326032  |
| C33 | 8.452117  | 25.291724 | 0.765256  |
| H34 | 9.314196  | 25.593924 | 1.343898  |
| C35 | 7.652550  | 30.441571 | -4.373089 |
| C36 | 8.521386  | 30.376382 | -3.283049 |
| C37 | 8.929626  | 31.532460 | -2.622399 |
| C38 | 8.462617  | 32.788634 | -3.019659 |
| C39 | 7.585161  | 32.855762 | -4.103566 |
| C40 | 7.194511  | 31.698901 | -4.776926 |
| H41 | 6.513493  | 31.769317 | -5.627929 |
| H42 | 7.181965  | 33.817300 | -4.416334 |
| H43 | 9.600582  | 31.457683 | -1.763323 |
| H44 | 8.881080  | 29.399411 | -2.954737 |
| C45 | 8.868473  | 34.022805 | -2.231258 |
| C46 | 10.034622 | 34.870465 | -2.857776 |
| O47 | 10.127093 | 35.091812 | -4.036778 |
| O48 | 10.836522 | 35.320281 | -1.997313 |
| H49 | 9.258149  | 33.680601 | -1.269035 |
| C50 | 7.669698  | 34.953016 | -1.930029 |
| H51 | 7.231609  | 35.342671 | -2.851354 |
| H52 | 7.990946  | 35.793628 | -1.309162 |
| H53 | 6.896678  | 34.387353 | -1.398688 |
| C54 | 7.149835  | 29.173332 | -5.025962 |
| C55 | 6.171272  | 28.375592 | -4.132191 |
| C56 | 5.022600  | 29.249077 | -3.618329 |
| C57 | 5.617093  | 27.184654 | -4.917393 |
| H58 | 4.981114  | 27.536049 | -5.741516 |
| H59 | 5.019881  | 26.547530 | -4.262502 |
| H60 | 6.417872  | 26.574994 | -5.345472 |
| H61 | 4.449644  | 29.663104 | -4.459312 |
| H62 | 5.380935  | 30.084189 | -3.007085 |
| H63 | 4.347653  | 28.643058 | -3.007926 |
| H64 | 6.719908  | 27.993715 | -3.262218 |
| H65 | 7.994306  | 28.522547 | -5.290632 |

|     |           |           |           |
|-----|-----------|-----------|-----------|
| H66 | 6.633679  | 29.427267 | -5.959896 |
| H67 | 7.496846  | 20.936143 | -2.819418 |
| H68 | 6.464762  | 23.760862 | -6.398600 |
| H69 | 3.793724  | 23.611218 | -5.998073 |
| H70 | 0.593988  | 23.979543 | -1.865114 |
| H71 | 0.977307  | 24.472583 | 0.876095  |
| H72 | 5.029188  | 25.292618 | 3.888678  |
| H73 | 7.635792  | 25.466588 | 3.677747  |
| H74 | 10.873396 | 25.506659 | -0.637099 |
| H75 | 10.569799 | 24.940545 | -3.319022 |

Ibuprofen 2-1 Transition State Doublet

|     |           |           |           |
|-----|-----------|-----------|-----------|
| C1  | 6.500987  | 21.308755 | -2.459032 |
| S2  | 6.367272  | 22.390491 | -0.971566 |
| H3  | 5.971503  | 20.385382 | -2.198424 |
| H4  | 5.977450  | 21.770986 | -3.297439 |
| O5  | 5.737801  | 26.656259 | -1.762247 |
| Fe6 | 5.845093  | 24.960485 | -1.464528 |
| N7  | 5.618307  | 24.349562 | -3.351715 |
| N8  | 3.859676  | 24.655259 | -1.125564 |
| N9  | 6.116266  | 25.146660 | 0.566617  |
| N10 | 7.827156  | 24.902379 | -1.688988 |
| C11 | 6.595422  | 24.212058 | -4.304000 |
| C12 | 6.018319  | 23.831048 | -5.568567 |
| C13 | 4.673599  | 23.755335 | -5.368226 |
| C14 | 4.434871  | 24.064955 | -3.981495 |
| C15 | 2.909506  | 24.350825 | -2.058793 |
| C16 | 1.597024  | 24.275725 | -1.448597 |
| C17 | 1.769009  | 24.524154 | -0.117751 |
| C18 | 3.187489  | 24.760641 | 0.059781  |
| C19 | 5.131078  | 25.161885 | 1.510906  |
| C20 | 5.687819  | 25.325155 | 2.826320  |
| C21 | 7.037030  | 25.402355 | 2.687292  |
| C22 | 7.293940  | 25.304980 | 1.256744  |
| C23 | 8.758894  | 25.206924 | -0.731355 |
| C24 | 10.070295 | 25.274276 | -1.320938 |
| C25 | 9.923109  | 24.993940 | -2.646933 |
| C26 | 8.518112  | 24.768819 | -2.867970 |
| C27 | 7.945027  | 24.446965 | -4.087844 |
| H28 | 8.602459  | 24.368540 | -4.944320 |
| C29 | 3.176864  | 24.081936 | -3.395002 |
| H30 | 2.339197  | 23.834726 | -4.032710 |
| C31 | 3.776387  | 25.002124 | 1.288568  |
| H32 | 3.142145  | 25.073004 | 2.161896  |
| C33 | 8.524171  | 25.389432 | 0.622184  |
| H34 | 9.395004  | 25.642657 | 1.206372  |
| C35 | 7.541723  | 30.095565 | -3.909393 |
| C36 | 8.588993  | 30.187054 | -2.993725 |
| C37 | 9.049830  | 31.421381 | -2.522792 |
| C38 | 8.490257  | 32.625715 | -2.959044 |
| C39 | 7.473824  | 32.545688 | -3.925548 |
| C40 | 7.011868  | 31.305495 | -4.389670 |
| H41 | 6.230074  | 31.278108 | -5.143223 |
| H42 | 7.018724  | 33.451829 | -4.307313 |
| H43 | 9.837046  | 31.439129 | -1.774427 |
| H44 | 9.053955  | 29.269332 | -2.655141 |
| C45 | 8.899288  | 33.926143 | -2.263597 |
| C46 | 10.039285 | 34.783580 | -2.864547 |
| O47 | 10.147299 | 35.029368 | -4.074062 |

|     |           |           |           |
|-----|-----------|-----------|-----------|
| O48 | 10.842866 | 35.290916 | -2.000674 |
| H49 | 9.264880  | 33.633702 | -1.275049 |
| C50 | 7.694518  | 34.867021 | -2.029536 |
| H51 | 7.289323  | 35.225880 | -2.977964 |
| H52 | 8.008427  | 35.729489 | -1.437362 |
| H53 | 6.902074  | 34.332590 | -1.497672 |
| C54 | 7.050277  | 28.742008 | -4.404960 |
| C55 | 5.752626  | 28.128776 | -3.794832 |
| C56 | 4.748942  | 29.170926 | -3.324779 |
| C57 | 5.121272  | 27.202188 | -4.829620 |
| H58 | 4.751578  | 27.792416 | -5.683422 |
| H59 | 4.281037  | 26.656518 | -4.399501 |
| H60 | 5.842628  | 26.481130 | -5.215517 |
| H61 | 4.469043  | 29.834488 | -4.157223 |
| H62 | 5.135666  | 29.803138 | -2.522397 |
| H63 | 3.835849  | 28.676774 | -2.985513 |
| H64 | 5.920478  | 27.365991 | -2.778342 |
| H65 | 7.860759  | 28.010264 | -4.325334 |
| H66 | 6.849946  | 28.854571 | -5.481401 |
| H67 | 7.509919  | 20.998958 | -2.834148 |
| H68 | 6.562461  | 23.716898 | -6.499904 |
| H69 | 3.875785  | 23.584166 | -6.081903 |
| H70 | 0.690369  | 24.044220 | -1.999330 |
| H71 | 1.085329  | 24.542046 | 0.745024  |
| H72 | 5.096167  | 25.319938 | 3.737500  |
| H73 | 7.688028  | 25.477772 | 3.560740  |
| H74 | 10.953380 | 25.531820 | -0.747994 |
| H75 | 10.653290 | 24.937527 | -3.431669 |

Ibuprofen 2-1 Transition State Quartet

|     |           |           |           |
|-----|-----------|-----------|-----------|
| C1  | 6.493808  | 21.250750 | -2.505611 |
| S2  | 6.343683  | 22.327713 | -1.004042 |
| H3  | 5.964781  | 20.315980 | -2.264809 |
| H4  | 5.972083  | 21.723040 | -3.348187 |
| O5  | 5.725123  | 26.653932 | -1.872841 |
| Fe6 | 5.825645  | 24.989819 | -1.428449 |
| N7  | 5.596024  | 24.324697 | -3.336132 |
| N8  | 3.829556  | 24.677039 | -1.097192 |
| N9  | 6.096331  | 25.165364 | 0.590506  |
| N10 | 7.824283  | 24.922900 | -1.657816 |
| C11 | 6.569003  | 24.206959 | -4.280138 |
| C12 | 5.995587  | 23.836330 | -5.547239 |
| C13 | 4.656665  | 23.761689 | -5.348682 |
| C14 | 4.421675  | 24.062007 | -3.961544 |
| C15 | 2.887214  | 24.369726 | -2.032267 |
| C16 | 1.577000  | 24.294136 | -1.422878 |
| C17 | 1.744892  | 24.541528 | -0.098820 |
| C18 | 3.160071  | 24.783569 | 0.079307  |
| C19 | 5.112534  | 25.184413 | 1.534680  |
| C20 | 5.673966  | 25.341484 | 2.844250  |
| C21 | 7.018546  | 25.413213 | 2.704262  |
| C22 | 7.275685  | 25.318675 | 1.279512  |
| C23 | 8.750261  | 25.222619 | -0.714036 |
| C24 | 10.058503 | 25.285092 | -1.305554 |
| C25 | 9.905816  | 25.002796 | -2.623020 |
| C26 | 8.500708  | 24.781599 | -2.834860 |
| C27 | 7.933028  | 24.451659 | -4.071185 |
| H28 | 8.591496  | 24.381571 | -4.929546 |
| C29 | 3.143945  | 24.092999 | -3.379192 |

|     |           |           |           |
|-----|-----------|-----------|-----------|
| H30 | 2.305628  | 23.856306 | -4.022320 |
| C31 | 3.745343  | 25.032850 | 1.323603  |
| H32 | 3.108959  | 25.115134 | 2.195789  |
| C33 | 8.521572  | 25.408487 | 0.656232  |
| H34 | 9.390038  | 25.671585 | 1.243756  |
| C35 | 7.511959  | 30.084772 | -3.940331 |
| C36 | 8.555453  | 30.179498 | -3.022016 |
| C37 | 9.013665  | 31.416715 | -2.558039 |
| C38 | 8.451453  | 32.613864 | -3.004735 |
| C39 | 7.442807  | 32.528709 | -3.976185 |
| C40 | 6.985998  | 31.289234 | -4.434403 |
| H41 | 6.201343  | 31.252820 | -5.194686 |
| H42 | 6.985165  | 33.438369 | -4.365166 |
| H43 | 9.798859  | 31.442632 | -1.799806 |
| H44 | 9.017504  | 29.257745 | -2.669822 |
| C45 | 8.840983  | 33.923695 | -2.304555 |
| C46 | 10.017065 | 34.791621 | -2.897812 |
| O47 | 10.126659 | 35.029522 | -4.072102 |
| O48 | 10.790147 | 35.265208 | -2.019784 |
| H49 | 9.187916  | 33.638942 | -1.307509 |
| C50 | 7.624556  | 34.858738 | -2.105536 |
| H51 | 7.231278  | 35.200712 | -3.066296 |
| H52 | 7.914354  | 35.733535 | -1.517446 |
| H53 | 6.827670  | 34.320951 | -1.581323 |
| C54 | 6.996228  | 28.728060 | -4.405666 |
| C55 | 5.660653  | 28.201012 | -3.818047 |
| C56 | 4.694959  | 29.264246 | -3.333387 |
| C57 | 5.000359  | 27.248149 | -4.804849 |
| H58 | 4.643549  | 27.820667 | -5.677670 |
| H59 | 4.143405  | 26.738324 | -4.356931 |
| H60 | 5.697250  | 26.489264 | -5.169481 |
| H61 | 4.426810  | 29.938375 | -4.161156 |
| H62 | 5.104359  | 29.885931 | -2.530783 |
| H63 | 3.768722  | 28.796870 | -2.987414 |
| H64 | 5.840287  | 27.401761 | -2.764211 |
| H65 | 7.776972  | 27.970784 | -4.257724 |
| H66 | 6.839906  | 28.790970 | -5.494032 |
| H67 | 7.509654  | 20.958388 | -2.872711 |
| H68 | 6.541658  | 23.721094 | -6.484642 |
| H69 | 3.858688  | 23.591075 | -6.070836 |
| H70 | 0.667693  | 24.055774 | -1.974994 |
| H71 | 1.055877  | 24.552930 | 0.766437  |
| H72 | 5.082739  | 25.335150 | 3.760983  |
| H73 | 7.677528  | 25.487861 | 3.578891  |
| H74 | 10.950319 | 25.538245 | -0.735286 |
| H75 | 10.639427 | 24.943252 | -3.414571 |

Ibuprofen 2-2 Reactant Complex Doublet

|     |          |           |           |
|-----|----------|-----------|-----------|
| C1  | 6.390206 | 20.994236 | -2.143478 |
| S2  | 6.254053 | 22.097372 | -0.685763 |
| H3  | 5.883238 | 20.068091 | -1.853418 |
| H4  | 5.858925 | 21.430738 | -2.989839 |
| O5  | 5.613842 | 26.128150 | -1.572277 |
| Fe6 | 5.745207 | 24.524557 | -1.241774 |
| N7  | 5.498325 | 23.980808 | -3.157671 |
| N8  | 3.764108 | 24.247315 | -0.907164 |
| N9  | 6.050486 | 24.718090 | 0.760110  |
| N10 | 7.746067 | 24.552264 | -1.515550 |
| C11 | 6.457987 | 23.953898 | -4.131840 |

|     |           |           |           |
|-----|-----------|-----------|-----------|
| C12 | 5.861796  | 23.728367 | -5.422361 |
| C13 | 4.519821  | 23.633869 | -5.216027 |
| C14 | 4.303053  | 23.797040 | -3.798545 |
| C15 | 2.803303  | 24.027413 | -1.849494 |
| C16 | 1.485786  | 24.012641 | -1.242033 |
| C17 | 1.669401  | 24.215793 | 0.093744  |
| C18 | 3.102560  | 24.357199 | 0.278489  |
| C19 | 5.072551  | 24.724100 | 1.708534  |
| C20 | 5.632778  | 24.959354 | 3.010209  |
| C21 | 6.976460  | 25.105201 | 2.853124  |
| C22 | 7.230684  | 24.956025 | 1.427861  |
| C23 | 8.680868  | 24.901075 | -0.579966 |
| C24 | 9.968732  | 25.075449 | -1.207227 |
| C25 | 9.800865  | 24.827100 | -2.535996 |
| C26 | 8.406738  | 24.502966 | -2.718530 |
| C27 | 7.806840  | 24.211718 | -3.931464 |
| H28 | 8.429867  | 24.239409 | -4.816018 |
| C29 | 3.051238  | 23.813862 | -3.197111 |
| H30 | 2.202506  | 23.643414 | -3.840912 |
| C31 | 3.712286  | 24.558395 | 1.503788  |
| H32 | 3.088508  | 24.640026 | 2.383764  |
| C33 | 8.450193  | 25.081581 | 0.776374  |
| H34 | 9.315403  | 25.390520 | 1.341610  |
| C35 | 7.836183  | 30.596813 | -4.199193 |
| C36 | 8.653915  | 30.623753 | -3.065255 |
| C37 | 9.079780  | 31.830602 | -2.507673 |
| C38 | 8.696202  | 33.056827 | -3.062936 |
| C39 | 7.888505  | 33.035481 | -4.203916 |
| C40 | 7.467693  | 31.826030 | -4.763038 |
| H41 | 6.846635  | 31.834053 | -5.653183 |
| H42 | 7.575519  | 33.973240 | -4.645473 |
| H43 | 9.709859  | 31.817042 | -1.624036 |
| H44 | 8.966167  | 29.687088 | -2.618887 |
| C45 | 9.093210  | 34.353438 | -2.382549 |
| C46 | 10.022782 | 35.293390 | -3.200337 |
| O47 | 10.863463 | 35.942465 | -2.475236 |
| O48 | 9.915424  | 35.372699 | -4.425611 |
| H49 | 9.649151  | 34.099964 | -1.475596 |
| C50 | 7.843620  | 35.148176 | -1.932567 |
| H51 | 7.251571  | 34.549508 | -1.232830 |
| H52 | 7.219133  | 35.379403 | -2.799868 |
| H53 | 8.140544  | 36.080020 | -1.444383 |
| C54 | 7.379074  | 29.281897 | -4.791574 |
| C55 | 6.453785  | 28.421480 | -3.896048 |
| C56 | 5.187940  | 29.182213 | -3.494508 |
| C57 | 6.091945  | 27.143122 | -4.659751 |
| H58 | 5.513081  | 27.389236 | -5.558146 |
| H59 | 5.502626  | 26.477033 | -4.027853 |
| H60 | 6.991560  | 26.603654 | -4.973180 |
| H61 | 5.395730  | 30.099205 | -2.932647 |
| H62 | 4.554586  | 28.549081 | -2.868256 |
| H63 | 4.619931  | 29.448905 | -4.395235 |
| H64 | 6.983000  | 28.122131 | -2.982350 |
| H65 | 8.255733  | 28.676475 | -5.054659 |
| H66 | 6.845306  | 29.481359 | -5.731607 |
| H67 | 7.395930  | 20.688909 | -2.507810 |
| H68 | 6.405538  | 23.718262 | -6.362312 |
| H69 | 3.722260  | 23.518398 | -5.943172 |
| H70 | 0.575130  | 23.874185 | -1.817009 |
| H71 | 0.982860  | 24.278169 | 0.951112  |

|     |           |           |           |
|-----|-----------|-----------|-----------|
| H72 | 5.025022  | 24.975683 | 3.908993  |
| H73 | 7.629741  | 25.284477 | 3.709022  |
| H74 | 10.855206 | 25.391654 | -0.665713 |
| H75 | 10.522803 | 24.879755 | -3.340977 |

Ibuprofen 2-2 Reactant Complex Quartet

|     |           |           |           |
|-----|-----------|-----------|-----------|
| C1  | 6.371805  | 20.946670 | -2.123454 |
| S2  | 6.259779  | 22.066587 | -0.665651 |
| H3  | 5.877246  | 20.011068 | -1.820781 |
| H4  | 5.820752  | 21.376199 | -2.968685 |
| O5  | 5.522597  | 26.084194 | -1.512955 |
| Fe6 | 5.734518  | 24.512337 | -1.226931 |
| N7  | 5.495606  | 23.955495 | -3.160118 |
| N8  | 3.748349  | 24.190177 | -0.889807 |
| N9  | 6.045289  | 24.693958 | 0.787019  |
| N10 | 7.748100  | 24.547217 | -1.505952 |
| C11 | 6.448620  | 23.937744 | -4.127942 |
| C12 | 5.857394  | 23.728035 | -5.420242 |
| C13 | 4.521782  | 23.632463 | -5.214799 |
| C14 | 4.307184  | 23.778236 | -3.798501 |
| C15 | 2.796876  | 23.985323 | -1.829836 |
| C16 | 1.479633  | 23.985954 | -1.231450 |
| C17 | 1.659462  | 24.193430 | 0.097374  |
| C18 | 3.089453  | 24.320460 | 0.283446  |
| C19 | 5.070606  | 24.717176 | 1.725394  |
| C20 | 5.626231  | 24.969017 | 3.021744  |
| C21 | 6.965810  | 25.102272 | 2.866456  |
| C22 | 7.218105  | 24.936262 | 1.447442  |
| C23 | 8.676380  | 24.890930 | -0.575267 |
| C24 | 9.962416  | 25.069471 | -1.197851 |
| C25 | 9.797187  | 24.821706 | -2.521209 |
| C26 | 8.407130  | 24.493610 | -2.701952 |
| C27 | 7.813400  | 24.195106 | -3.930832 |
| H28 | 8.439727  | 24.215820 | -4.815101 |
| C29 | 3.041387  | 23.786247 | -3.196966 |
| H30 | 2.187999  | 23.633108 | -3.844094 |
| C31 | 3.696817  | 24.549437 | 1.524066  |
| H32 | 3.068006  | 24.657575 | 2.400203  |
| C33 | 8.452110  | 25.067915 | 0.796555  |
| H34 | 9.318171  | 25.377471 | 1.364380  |
| C35 | 7.859587  | 30.615398 | -4.261617 |
| C36 | 8.640949  | 30.635376 | -3.105328 |
| C37 | 9.040960  | 31.837092 | -2.525611 |
| C38 | 8.658575  | 33.061057 | -3.083291 |
| C39 | 7.873429  | 33.045087 | -4.237378 |
| C40 | 7.482572  | 31.840904 | -4.821626 |
| H41 | 6.869813  | 31.843751 | -5.724217 |
| H42 | 7.547127  | 33.989866 | -4.670017 |
| H43 | 9.644639  | 31.826097 | -1.615828 |
| H44 | 8.934529  | 29.690058 | -2.649825 |
| C45 | 9.040981  | 34.355498 | -2.387367 |
| C46 | 10.006533 | 35.301692 | -3.207572 |
| O47 | 10.832524 | 35.903441 | -2.470552 |
| O48 | 9.897511  | 35.376567 | -4.405685 |
| H49 | 9.592713  | 34.096189 | -1.479134 |
| C50 | 7.784657  | 35.141289 | -1.938881 |
| H51 | 7.200636  | 34.532591 | -1.239102 |
| H52 | 7.154825  | 35.365934 | -2.805206 |
| H53 | 8.067107  | 36.078170 | -1.448437 |

|     |           |           |           |
|-----|-----------|-----------|-----------|
| C54 | 7.403631  | 29.297668 | -4.854227 |
| C55 | 6.493132  | 28.470876 | -3.919445 |
| C56 | 5.225816  | 29.238204 | -3.535291 |
| C57 | 6.128828  | 27.153384 | -4.607223 |
| H58 | 5.529331  | 27.353983 | -5.505783 |
| H59 | 5.554470  | 26.517223 | -3.931204 |
| H60 | 7.026485  | 26.607226 | -4.916234 |
| H61 | 5.428708  | 30.163092 | -2.984878 |
| H62 | 4.584014  | 28.616069 | -2.905976 |
| H63 | 4.665027  | 29.492993 | -4.445726 |
| H64 | 7.056497  | 28.241217 | -3.003837 |
| H65 | 8.276119  | 28.684036 | -5.115192 |
| H66 | 6.859935  | 29.485889 | -5.790722 |
| H67 | 7.380181  | 20.654520 | -2.497176 |
| H68 | 6.404350  | 23.725858 | -6.364225 |
| H69 | 3.722943  | 23.528039 | -5.949358 |
| H70 | 0.565120  | 23.867022 | -1.813600 |
| H71 | 0.971250  | 24.269874 | 0.954457  |
| H72 | 5.012848  | 25.008018 | 3.920704  |
| H73 | 7.624855  | 25.291788 | 3.721796  |
| H74 | 10.851945 | 25.390967 | -0.654996 |
| H75 | 10.524682 | 24.882023 | -3.328243 |

Ibuprofen 2-2 Transition State Doublet

|     |           |           |           |
|-----|-----------|-----------|-----------|
| C1  | 6.404352  | 21.098811 | -2.135388 |
| S2  | 6.271153  | 22.223797 | -0.685895 |
| H3  | 5.859151  | 20.193929 | -1.848505 |
| H4  | 5.889269  | 21.552514 | -2.983968 |
| O5  | 5.716117  | 26.420645 | -1.710445 |
| Fe6 | 5.812446  | 24.751016 | -1.348225 |
| N7  | 5.550094  | 24.129425 | -3.230319 |
| N8  | 3.823057  | 24.436295 | -0.993778 |
| N9  | 6.114631  | 24.885174 | 0.673323  |
| N10 | 7.796738  | 24.689605 | -1.601697 |
| C11 | 6.507486  | 24.072621 | -4.209285 |
| C12 | 5.905584  | 23.781098 | -5.484260 |
| C13 | 4.567015  | 23.673848 | -5.263684 |
| C14 | 4.354557  | 23.900026 | -3.858231 |
| C15 | 2.855999  | 24.169022 | -1.922361 |
| C16 | 1.548620  | 24.097314 | -1.297952 |
| C17 | 1.741468  | 24.296309 | 0.036145  |
| C18 | 3.168322  | 24.496266 | 0.203513  |
| C19 | 5.138336  | 24.838287 | 1.627895  |
| C20 | 5.703998  | 24.982977 | 2.938438  |
| C21 | 7.048855  | 25.125648 | 2.789755  |
| C22 | 7.302007  | 25.048988 | 1.356053  |
| C23 | 8.741028  | 24.987327 | -0.656566 |
| C24 | 10.032623 | 25.127829 | -1.280307 |
| C25 | 9.857057  | 24.902223 | -2.612948 |
| C26 | 8.456359  | 24.626921 | -2.802892 |
| C27 | 7.855244  | 24.337801 | -4.019099 |
| H28 | 8.480906  | 24.339174 | -4.900661 |
| C29 | 3.100098  | 23.922966 | -3.261894 |
| H30 | 2.253961  | 23.705761 | -3.897243 |
| C31 | 3.782582  | 24.669270 | 1.428223  |
| H32 | 3.164346  | 24.703929 | 2.315407  |
| C33 | 8.524035  | 25.136942 | 0.708014  |
| H34 | 9.405151  | 25.384611 | 1.277450  |
| C35 | 7.781584  | 30.196656 | -3.511538 |



|     |           |           |           |
|-----|-----------|-----------|-----------|
| C36 | 8.828473  | 30.435242 | -2.616881 |
| C37 | 9.259922  | 31.729753 | -2.304050 |
| C38 | 8.677129  | 32.856920 | -2.886932 |
| C39 | 7.651768  | 32.631653 | -3.820607 |
| C40 | 7.216078  | 31.332984 | -4.121664 |
| H41 | 6.425038  | 31.202055 | -4.852651 |
| H42 | 7.179786  | 33.474614 | -4.312482 |
| H43 | 10.052470 | 31.853797 | -1.571720 |
| H44 | 9.332896  | 29.595871 | -2.160872 |
| C45 | 9.068911  | 34.240575 | -2.368066 |
| C46 | 9.988045  | 35.175971 | -3.218869 |
| O47 | 10.817681 | 35.849924 | -2.498033 |
| O48 | 9.885771  | 35.262457 | -4.447579 |
| H49 | 9.633793  | 34.071796 | -1.447097 |
| C50 | 7.815250  | 35.054218 | -1.969463 |
| H51 | 7.214284  | 34.488804 | -1.249876 |
| H52 | 7.202210  | 35.255243 | -2.852218 |
| H53 | 8.113471  | 36.003812 | -1.518771 |
| C54 | 7.383674  | 28.771383 | -3.901789 |
| C55 | 6.002728  | 28.153337 | -3.484800 |
| C56 | 4.926244  | 29.192680 | -3.201214 |
| C57 | 5.542050  | 27.229180 | -4.615431 |
| H58 | 5.267031  | 27.827000 | -5.500998 |
| H59 | 4.672996  | 26.644003 | -4.310664 |
| H60 | 6.333401  | 26.539212 | -4.913766 |
| H61 | 5.126546  | 29.888687 | -2.379718 |
| H62 | 3.973508  | 28.694232 | -3.012563 |
| H63 | 4.781112  | 29.804594 | -4.106901 |
| H64 | 6.011164  | 27.316304 | -2.506087 |
| H65 | 8.187784  | 28.090354 | -3.605051 |
| H66 | 7.384984  | 28.763022 | -5.003819 |
| H67 | 7.400961  | 20.756509 | -2.502531 |
| H68 | 6.440903  | 23.736797 | -6.424139 |
| H69 | 3.760376  | 23.508257 | -5.971595 |
| H70 | 0.635058  | 23.916536 | -1.858114 |
| H71 | 1.061824  | 24.321648 | 0.903572  |
| H72 | 5.094564  | 24.931894 | 3.838490  |
| H73 | 7.693985  | 25.261451 | 3.661133  |
| H74 | 10.926834 | 25.411346 | -0.733816 |
| H75 | 10.577899 | 24.916126 | -3.414220 |

Ibuprofen 2-2 Transition State Quartet

|     |          |           |           |
|-----|----------|-----------|-----------|
| C1  | 6.414703 | 21.079203 | -2.139109 |
| S2  | 6.311747 | 22.214559 | -0.681607 |
| H3  | 5.859685 | 20.174805 | -1.851282 |
| H4  | 5.899332 | 21.542997 | -2.990414 |
| O5  | 5.732591 | 26.462923 | -1.821464 |
| Fe6 | 5.786128 | 24.821634 | -1.343857 |
| N7  | 5.525660 | 24.131956 | -3.228297 |
| N8  | 3.792439 | 24.464936 | -0.979914 |
| N9  | 6.089226 | 24.924933 | 0.691427  |
| N10 | 7.786839 | 24.714696 | -1.585060 |
| C11 | 6.481648 | 24.068163 | -4.195807 |
| C12 | 5.887871 | 23.771287 | -5.469800 |
| C13 | 4.554135 | 23.673571 | -5.255604 |
| C14 | 4.339361 | 23.908923 | -3.854025 |
| C15 | 2.832962 | 24.191576 | -1.905901 |
| C16 | 1.528835 | 24.109865 | -1.285417 |
| C17 | 1.718184 | 24.303574 | 0.043905  |

|     |           |           |           |
|-----|-----------|-----------|-----------|
| C18 | 3.141127  | 24.511483 | 0.210128  |
| C19 | 5.120663  | 24.865863 | 1.645211  |
| C20 | 5.687815  | 25.002813 | 2.951828  |
| C21 | 7.026787  | 25.146360 | 2.801274  |
| C22 | 7.274005  | 25.081648 | 1.371929  |
| C23 | 8.725264  | 25.010879 | -0.648215 |
| C24 | 10.017146 | 25.130770 | -1.269505 |
| C25 | 9.842457  | 24.892511 | -2.593280 |
| C26 | 8.441182  | 24.630541 | -2.780544 |
| C27 | 7.845131  | 24.329509 | -4.008425 |
| H28 | 8.475345  | 24.319369 | -4.890473 |
| C29 | 3.068908  | 23.937767 | -3.260153 |
| H30 | 2.220199  | 23.718434 | -3.893686 |
| C31 | 3.751018  | 24.685563 | 1.454869  |
| H32 | 3.132281  | 24.713387 | 2.342280  |
| C33 | 8.513255  | 25.172792 | 0.727454  |
| H34 | 9.393751  | 25.423969 | 1.300647  |
| C35 | 7.757332  | 30.227843 | -3.683434 |
| C36 | 8.768871  | 30.424891 | -2.744305 |
| C37 | 9.200478  | 31.700915 | -2.375131 |
| C38 | 8.648598  | 32.848867 | -2.947909 |
| C39 | 7.660358  | 32.665334 | -3.925638 |
| C40 | 7.224167  | 31.385103 | -4.281866 |
| H41 | 6.455769  | 31.279025 | -5.049260 |
| H42 | 7.218104  | 33.536848 | -4.409444 |
| H43 | 9.970347  | 31.799050 | -1.606764 |
| H44 | 9.245636  | 29.553735 | -2.300001 |
| C45 | 9.035108  | 34.219957 | -2.385974 |
| C46 | 9.983662  | 35.178670 | -3.225968 |
| O47 | 10.792295 | 35.805227 | -2.484281 |
| O48 | 9.876888  | 35.273712 | -4.424811 |
| H49 | 9.594995  | 34.031139 | -1.465681 |
| C50 | 7.777593  | 35.028151 | -1.981024 |
| H51 | 7.176686  | 34.451242 | -1.268542 |
| H52 | 7.164262  | 35.238219 | -2.863168 |
| H53 | 8.068865  | 35.974653 | -1.515834 |
| C54 | 7.336015  | 28.820634 | -4.116160 |
| C55 | 5.988783  | 28.187436 | -3.625900 |
| C56 | 4.904997  | 29.218704 | -3.351813 |
| C57 | 5.523406  | 27.200216 | -4.699399 |
| H58 | 5.196176  | 27.753791 | -5.596499 |
| H59 | 4.687592  | 26.594336 | -4.341959 |
| H60 | 6.328249  | 26.524363 | -5.002346 |
| H61 | 5.115905  | 29.933733 | -2.546685 |
| H62 | 3.957024  | 28.721138 | -3.130216 |
| H63 | 4.749385  | 29.801763 | -4.274823 |
| H64 | 6.030276  | 27.382662 | -2.601454 |
| H65 | 8.161338  | 28.126974 | -3.914163 |
| H66 | 7.244434  | 28.860971 | -5.214844 |
| H67 | 7.410114  | 20.733217 | -2.510071 |
| H68 | 6.427608  | 23.724539 | -6.414778 |
| H69 | 3.749422  | 23.511758 | -5.973344 |
| H70 | 0.612020  | 23.924458 | -1.847555 |
| H71 | 1.034683  | 24.325736 | 0.912512  |
| H72 | 5.080950  | 24.951376 | 3.858532  |
| H73 | 7.680312  | 25.277371 | 3.674480  |
| H74 | 10.917856 | 25.412559 | -0.723982 |
| H75 | 10.569649 | 24.903459 | -3.397808 |

Ibuprofen 2-3 Reactant Complex Doublet

|     |           |           |           |
|-----|-----------|-----------|-----------|
| C1  | 6.525043  | 21.131728 | -2.197115 |
| S2  | 6.481291  | 22.273944 | -0.762000 |
| H3  | 5.895554  | 20.284942 | -1.911918 |
| H4  | 6.066808  | 21.625551 | -3.055322 |
| O5  | 5.546656  | 26.341867 | -1.478648 |
| Fe6 | 5.756892  | 24.744412 | -1.224137 |
| N7  | 5.522127  | 24.207548 | -3.141012 |
| N8  | 3.779119  | 24.406850 | -0.892268 |
| N9  | 6.054525  | 24.898497 | 0.780014  |
| N10 | 7.759841  | 24.803299 | -1.501268 |
| C11 | 6.484406  | 24.187175 | -4.112623 |
| C12 | 5.893118  | 23.919487 | -5.399125 |
| C13 | 4.555510  | 23.801884 | -5.199310 |
| C14 | 4.329552  | 23.989172 | -3.786139 |
| C15 | 2.825389  | 24.195397 | -1.842167 |
| C16 | 1.504837  | 24.168286 | -1.249883 |
| C17 | 1.670564  | 24.361668 | 0.088588  |
| C18 | 3.101886  | 24.521411 | 0.290113  |
| C19 | 5.072088  | 24.891105 | 1.727497  |
| C20 | 5.638029  | 25.098287 | 3.031579  |
| C21 | 6.984906  | 25.252355 | 2.876182  |
| C22 | 7.233198  | 25.138563 | 1.447092  |
| C23 | 8.693275  | 25.135413 | -0.556867 |
| C24 | 9.990791  | 25.279585 | -1.175721 |
| C25 | 9.835864  | 25.017795 | -2.504072 |
| C26 | 8.431495  | 24.734833 | -2.700293 |
| C27 | 7.832169  | 24.456649 | -3.912997 |
| H28 | 8.462993  | 24.479129 | -4.792437 |
| C29 | 3.081726  | 23.999075 | -3.192803 |
| H30 | 2.234652  | 23.834406 | -3.842388 |
| C31 | 3.709417  | 24.735789 | 1.515413  |
| H32 | 3.075466  | 24.814134 | 2.390179  |
| C33 | 8.450190  | 25.299438 | 0.797392  |
| H34 | 9.305554  | 25.611485 | 1.376078  |
| C35 | 7.375224  | 30.494484 | -4.437727 |
| C36 | 8.347155  | 30.393396 | -3.437504 |
| C37 | 8.922660  | 31.536904 | -2.878960 |
| C38 | 8.543040  | 32.815819 | -3.307134 |
| C39 | 7.556119  | 32.920095 | -4.290958 |
| C40 | 6.984183  | 31.773836 | -4.847386 |
| H41 | 6.233559  | 31.879517 | -5.621462 |
| H42 | 7.261950  | 33.900207 | -4.640096 |
| H43 | 9.676278  | 31.436166 | -2.104160 |
| H44 | 8.660843  | 29.409597 | -3.103140 |
| C45 | 9.169235  | 34.042295 | -2.673487 |
| C46 | 9.859914  | 35.019585 | -3.653773 |
| O47 | 9.332563  | 35.406317 | -4.688965 |
| O48 | 11.016414 | 35.443039 | -3.244502 |
| H49 | 9.943923  | 33.702073 | -1.982337 |
| C50 | 8.121523  | 34.834743 | -1.851978 |
| H51 | 7.312649  | 35.173703 | -2.500772 |
| H52 | 8.573722  | 35.710873 | -1.377859 |
| H53 | 7.683249  | 34.191179 | -1.081354 |
| C54 | 6.750559  | 29.251981 | -5.027923 |
| C55 | 5.942299  | 28.417284 | -4.013438 |
| C56 | 4.827237  | 29.238721 | -3.360827 |
| C57 | 5.351578  | 27.194177 | -4.714935 |
| H58 | 4.823567  | 26.566827 | -3.996489 |
| H59 | 6.132764  | 26.595161 | -5.185855 |

|     |           |           |           |
|-----|-----------|-----------|-----------|
| H60 | 4.648047  | 27.505668 | -5.496845 |
| H61 | 5.203537  | 30.160864 | -2.908866 |
| H62 | 4.344416  | 28.640091 | -2.587277 |
| H63 | 4.074442  | 29.509273 | -4.112371 |
| H64 | 6.617777  | 28.069188 | -3.224183 |
| H65 | 7.530511  | 28.611544 | -5.458729 |
| H66 | 6.084682  | 29.533700 | -5.851859 |
| H67 | 7.488070  | 20.688661 | -2.546018 |
| H68 | 6.443950  | 23.871979 | -6.327517 |
| H69 | 3.771233  | 23.648457 | -5.937029 |
| H70 | 0.603871  | 24.007728 | -1.837213 |
| H71 | 0.963882  | 24.384834 | 0.933813  |
| H72 | 5.033457  | 25.090826 | 3.933932  |
| H73 | 7.649496  | 25.421563 | 3.731457  |
| H74 | 10.882690 | 25.577909 | -0.630593 |
| H75 | 10.586658 | 25.012326 | -3.295331 |

Ibuprofen 2-3 Reactant Complex Quartet

|     |          |           |           |
|-----|----------|-----------|-----------|
| C1  | 6.522529 | 21.125606 | -2.196573 |
| S2  | 6.490805 | 22.272730 | -0.752413 |
| H3  | 5.892818 | 20.271733 | -1.915191 |
| H4  | 6.063711 | 21.627349 | -3.057010 |
| O5  | 5.533337 | 26.347506 | -1.478747 |
| Fe6 | 5.751396 | 24.777879 | -1.227219 |
| N7  | 5.520749 | 24.205014 | -3.151201 |
| N8  | 3.766880 | 24.408262 | -0.890873 |
| N9  | 6.054493 | 24.903722 | 0.790932  |
| N10 | 7.766933 | 24.803370 | -1.500815 |
| C11 | 6.476745 | 24.182280 | -4.114375 |
| C12 | 5.889563 | 23.917177 | -5.400044 |
| C13 | 4.558190 | 23.802407 | -5.200762 |
| C14 | 4.335938 | 23.989147 | -3.792225 |
| C15 | 2.822503 | 24.197381 | -1.833638 |
| C16 | 1.503520 | 24.168755 | -1.247990 |
| C17 | 1.667674 | 24.361379 | 0.085632  |
| C18 | 3.096541 | 24.521274 | 0.284366  |
| C19 | 5.078415 | 24.893390 | 1.731546  |
| C20 | 5.640283 | 25.098572 | 3.032885  |
| C21 | 6.981125 | 25.250409 | 2.878014  |
| C22 | 7.226472 | 25.138020 | 1.454347  |
| C23 | 8.695835 | 25.134041 | -0.562377 |
| C24 | 9.989064 | 25.278331 | -1.178722 |
| C25 | 9.835487 | 25.016878 | -2.500682 |
| C26 | 8.435571 | 24.732791 | -2.694512 |
| C27 | 7.840351 | 24.452890 | -3.923449 |
| H28 | 8.470833 | 24.478212 | -4.805156 |
| C29 | 3.069701 | 23.996175 | -3.201848 |
| H30 | 2.221164 | 23.832986 | -3.848583 |
| C31 | 3.699251 | 24.735934 | 1.527109  |
| H32 | 3.065944 | 24.813317 | 2.403717  |
| C33 | 8.461460 | 25.302203 | 0.806036  |
| H34 | 9.318108 | 25.617207 | 1.383802  |
| C35 | 7.375672 | 30.496318 | -4.437226 |
| C36 | 8.344345 | 30.392287 | -3.435898 |
| C37 | 8.916604 | 31.533904 | -2.875644 |
| C38 | 8.534077 | 32.810486 | -3.302875 |
| C39 | 7.551323 | 32.918815 | -4.288528 |
| C40 | 6.983250 | 31.774445 | -4.845571 |
| H41 | 6.230634 | 31.879605 | -5.627784 |

|     |           |           |           |
|-----|-----------|-----------|-----------|
| H42 | 7.265163  | 33.906168 | -4.645907 |
| H43 | 9.679795  | 31.435361 | -2.101761 |
| H44 | 8.663284  | 29.402254 | -3.103551 |
| C45 | 9.163942  | 34.037988 | -2.668410 |
| C46 | 9.861715  | 35.030470 | -3.671549 |
| O47 | 9.335025  | 35.392179 | -4.673144 |
| O48 | 10.993163 | 35.433881 | -3.244976 |
| H49 | 9.945558  | 33.702832 | -1.982760 |
| C50 | 8.119794  | 34.837372 | -1.849399 |
| H51 | 7.313074  | 35.178843 | -2.501700 |
| H52 | 8.572875  | 35.712200 | -1.370186 |
| H53 | 7.680302  | 34.190422 | -1.082076 |
| C54 | 6.751205  | 29.249134 | -5.028677 |
| C55 | 5.942346  | 28.415349 | -4.012638 |
| C56 | 4.826430  | 29.239226 | -3.361660 |
| C57 | 5.352822  | 27.192212 | -4.715109 |
| H58 | 4.824774  | 26.564562 | -3.995511 |
| H59 | 6.134071  | 26.588782 | -5.184747 |
| H60 | 4.649362  | 27.505089 | -5.498655 |
| H61 | 5.200042  | 30.163944 | -2.908292 |
| H62 | 4.341325  | 28.643254 | -2.585833 |
| H63 | 4.074139  | 29.506769 | -4.116380 |
| H64 | 6.616997  | 28.065951 | -3.220470 |
| H65 | 7.530538  | 28.608069 | -5.462868 |
| H66 | 6.082466  | 29.532500 | -5.850665 |
| H67 | 7.487500  | 20.684217 | -2.548759 |
| H68 | 6.442671  | 23.870525 | -6.330708 |
| H69 | 3.770912  | 23.648451 | -5.940566 |
| H70 | 0.600111  | 24.007250 | -1.837538 |
| H71 | 0.958955  | 24.384601 | 0.932379  |
| H72 | 5.031405  | 25.095582 | 3.936168  |
| H73 | 7.648239  | 25.421774 | 3.734443  |
| H74 | 10.882761 | 25.576352 | -0.629477 |
| H75 | 10.588397 | 25.011894 | -3.294292 |

Ibuprofen 2-3 Transition State Doublet

|     |          |           |           |
|-----|----------|-----------|-----------|
| C1  | 6.587490 | 21.337520 | -2.268652 |
| S2  | 6.566588 | 22.474277 | -0.822674 |
| H3  | 5.880210 | 20.541523 | -2.024229 |
| H4  | 6.206437 | 21.869926 | -3.142046 |
| O5  | 5.684063 | 26.714701 | -1.529909 |
| Fe6 | 5.859926 | 24.956910 | -1.339400 |
| N7  | 5.597821 | 24.481204 | -3.260677 |
| N8  | 3.873636 | 24.621303 | -0.996028 |
| N9  | 6.157333 | 25.116592 | 0.678038  |
| N10 | 7.843937 | 24.982625 | -1.626246 |
| C11 | 6.554252 | 24.426163 | -4.238409 |
| C12 | 5.961158 | 24.083253 | -5.505295 |
| C13 | 4.628920 | 23.931476 | -5.283289 |
| C14 | 4.412174 | 24.182462 | -3.881735 |
| C15 | 2.913739 | 24.358644 | -1.930290 |
| C16 | 1.606309 | 24.261920 | -1.314770 |
| C17 | 1.787790 | 24.451900 | 0.023069  |
| C18 | 3.211994 | 24.680586 | 0.197402  |
| C19 | 5.187824 | 25.043792 | 1.630432  |
| C20 | 5.761664 | 25.148144 | 2.943644  |
| C21 | 7.105523 | 25.304369 | 2.790239  |
| C22 | 7.342306 | 25.277547 | 1.350447  |
| C23 | 8.787755 | 25.254221 | -0.669519 |

|     |           |           |           |
|-----|-----------|-----------|-----------|
| C24 | 10.088098 | 25.367200 | -1.284539 |
| C25 | 9.924865  | 25.140028 | -2.618346 |
| C26 | 8.514566  | 24.915272 | -2.823499 |
| C27 | 7.909665  | 24.671867 | -4.044758 |
| H28 | 8.543346  | 24.662359 | -4.921407 |
| C29 | 3.163838  | 24.145213 | -3.278552 |
| H30 | 2.324614  | 23.900687 | -3.913540 |
| C31 | 3.825472  | 24.873914 | 1.423142  |
| H32 | 3.201585  | 24.891537 | 2.306127  |
| C33 | 8.563670  | 25.387213 | 0.692515  |
| H34 | 9.443503  | 25.618306 | 1.269407  |
| C35 | 7.504146  | 30.060253 | -3.893730 |
| C36 | 8.616229  | 30.161803 | -3.059257 |
| C37 | 9.171763  | 31.402001 | -2.723388 |
| C38 | 8.647506  | 32.598801 | -3.228175 |
| C39 | 7.538719  | 32.505255 | -4.086914 |
| C40 | 6.981171  | 31.260833 | -4.406954 |
| H41 | 6.132020  | 31.225036 | -5.081600 |
| H42 | 7.128179  | 33.408572 | -4.522945 |
| H43 | 10.022858 | 31.436977 | -2.051602 |
| H44 | 9.063306  | 29.248592 | -2.684534 |
| C45 | 9.211415  | 33.923510 | -2.721119 |
| C46 | 9.850435  | 34.933673 | -3.715471 |
| O47 | 9.292460  | 35.318178 | -4.735216 |
| O48 | 10.988824 | 35.410591 | -3.307845 |
| H49 | 10.004083 | 33.675117 | -2.011485 |
| C50 | 8.116837  | 34.700106 | -1.946505 |
| H51 | 7.288990  | 34.945882 | -2.614269 |
| H52 | 8.517725  | 35.632749 | -1.539661 |
| H53 | 7.723803  | 34.087163 | -1.128710 |
| C54 | 6.933603  | 28.699627 | -4.279699 |
| C55 | 5.613493  | 28.244056 | -3.620533 |
| C56 | 4.808072  | 29.328716 | -2.946845 |
| C57 | 4.777976  | 27.380000 | -4.542451 |
| H58 | 3.971640  | 26.889535 | -3.993429 |
| H59 | 5.376002  | 26.616580 | -5.041448 |
| H60 | 4.324959  | 28.012520 | -5.322957 |
| H61 | 5.347449  | 29.815829 | -2.133027 |
| H62 | 3.877865  | 28.916072 | -2.562222 |
| H63 | 4.551043  | 30.110219 | -3.677239 |
| H64 | 5.820869  | 27.308685 | -2.529927 |
| H65 | 7.696956  | 27.925728 | -4.134978 |
| H66 | 6.739473  | 28.724326 | -5.361997 |
| H67 | 7.531218  | 20.823524 | -2.587030 |
| H68 | 6.509587  | 23.976250 | -6.425641 |
| H69 | 3.835057  | 23.704146 | -5.987993 |
| H70 | 0.702245  | 24.057519 | -1.879779 |
| H71 | 1.099321  | 24.431490 | 0.884682  |
| H72 | 5.160305  | 25.048561 | 3.844524  |
| H73 | 7.764281  | 25.417327 | 3.658206  |
| H74 | 10.982577 | 25.635102 | -0.730558 |
| H75 | 10.669839 | 25.088942 | -3.405063 |

Ibuprofen 2-3 Transition State Quartet

|    |          |           |           |
|----|----------|-----------|-----------|
| C1 | 6.591852 | 21.244205 | -2.264889 |
| S2 | 6.595359 | 22.400253 | -0.829436 |
| H3 | 5.895302 | 20.439117 | -1.999158 |
| H4 | 6.185503 | 21.765208 | -3.142561 |
| O5 | 5.706480 | 26.682291 | -1.718155 |

|     |           |           |           |
|-----|-----------|-----------|-----------|
| Fe6 | 5.816803  | 25.021576 | -1.334021 |
| N7  | 5.561596  | 24.401553 | -3.243684 |
| N8  | 3.823303  | 24.659877 | -0.984296 |
| N9  | 6.114436  | 25.136670 | 0.688396  |
| N10 | 7.822282  | 24.950453 | -1.593328 |
| C11 | 6.517609  | 24.352345 | -4.208703 |
| C12 | 5.928047  | 24.026091 | -5.478002 |
| C13 | 4.598408  | 23.894860 | -5.265039 |
| C14 | 4.380712  | 24.142410 | -3.866230 |
| C15 | 2.870629  | 24.385063 | -1.916546 |
| C16 | 1.566873  | 24.286328 | -1.303412 |
| C17 | 1.743657  | 24.481417 | 0.027705  |
| C18 | 3.161964  | 24.724982 | 0.200840  |
| C19 | 5.142806  | 25.079141 | 1.641111  |
| C20 | 5.718488  | 25.173667 | 2.949378  |
| C21 | 7.060363  | 25.313981 | 2.797693  |
| C22 | 7.298567  | 25.285047 | 1.365202  |
| C23 | 8.759306  | 25.236859 | -0.650708 |
| C24 | 10.055833 | 25.342746 | -1.264045 |
| C25 | 9.892191  | 25.098168 | -2.589297 |
| C26 | 8.485687  | 24.865690 | -2.788326 |
| C27 | 7.886064  | 24.604088 | -4.021423 |
| H28 | 8.520855  | 24.599639 | -4.900321 |
| C29 | 3.111619  | 24.148199 | -3.273605 |
| H30 | 2.266163  | 23.927759 | -3.911491 |
| C31 | 3.768886  | 24.930980 | 1.444019  |
| H32 | 3.140213  | 24.976582 | 2.324566  |
| C33 | 8.537953  | 25.393872 | 0.722705  |
| H34 | 9.411694  | 25.646502 | 1.303561  |
| C35 | 7.431258  | 30.087197 | -3.938634 |
| C36 | 8.539534  | 30.168986 | -3.099469 |
| C37 | 9.097340  | 31.400583 | -2.740966 |
| C38 | 8.578818  | 32.601917 | -3.232145 |
| C39 | 7.475364  | 32.529781 | -4.096203 |
| C40 | 6.914646  | 31.295245 | -4.437399 |
| H41 | 6.063897  | 31.269917 | -5.120385 |
| H42 | 7.073179  | 33.448288 | -4.523676 |
| H43 | 9.948123  | 31.424224 | -2.057330 |
| H44 | 8.979709  | 29.240093 | -2.736820 |
| C45 | 9.146050  | 33.923107 | -2.710656 |
| C46 | 9.810967  | 34.945746 | -3.721004 |
| O47 | 9.277624  | 35.304554 | -4.717808 |
| O48 | 10.925399 | 35.395082 | -3.281856 |
| H49 | 9.937677  | 33.670109 | -2.001179 |
| C50 | 8.051254  | 34.706202 | -1.939948 |
| H51 | 7.226042  | 34.958199 | -2.610300 |
| H52 | 8.453886  | 35.636193 | -1.525369 |
| H53 | 7.650453  | 34.090682 | -1.125921 |
| C54 | 6.845731  | 28.735114 | -4.332180 |
| C55 | 5.547154  | 28.259481 | -3.625637 |
| C56 | 4.686237  | 29.367482 | -3.051032 |
| C57 | 4.747838  | 27.355484 | -4.554316 |
| H58 | 3.935786  | 26.858371 | -4.018312 |
| H59 | 5.376514  | 26.588337 | -5.011210 |
| H60 | 4.305436  | 27.953883 | -5.370121 |
| H61 | 5.175733  | 29.923203 | -2.245957 |
| H62 | 3.754276  | 28.947716 | -2.672051 |
| H63 | 4.425217  | 30.095343 | -3.835534 |
| H64 | 5.777001  | 27.454227 | -2.613097 |
| H65 | 7.616053  | 27.960340 | -4.234119 |

|     |           |           |           |
|-----|-----------|-----------|-----------|
| H66 | 6.607590  | 28.786481 | -5.406960 |
| H67 | 7.538552  | 20.746237 | -2.591709 |
| H68 | 6.479969  | 23.930392 | -6.403085 |
| H69 | 3.804968  | 23.685072 | -5.982417 |
| H70 | 0.660796  | 24.066692 | -1.868064 |
| H71 | 1.051389  | 24.451162 | 0.891613  |
| H72 | 5.119992  | 25.077375 | 3.858411  |
| H73 | 7.721628  | 25.424461 | 3.670706  |
| H74 | 10.954680 | 25.619473 | -0.712496 |
| H75 | 10.641573 | 25.056480 | -3.379580 |

Ibuprofen 3-1 Reactant Complex Doublet

|     |           |           |           |
|-----|-----------|-----------|-----------|
| C1  | 6.483136  | 21.210433 | -2.283718 |
| S2  | 6.387633  | 22.229893 | -0.750771 |
| H3  | 5.875647  | 20.313449 | -2.102324 |
| H4  | 6.042333  | 21.760361 | -3.122322 |
| O5  | 5.474750  | 26.255815 | -1.380716 |
| Fe6 | 5.704701  | 24.661187 | -1.222924 |
| N7  | 5.478557  | 24.201315 | -3.188207 |
| N8  | 3.719796  | 24.283198 | -0.916597 |
| N9  | 6.000386  | 24.793608 | 0.791265  |
| N10 | 7.722731  | 24.752673 | -1.506249 |
| C11 | 6.441841  | 24.196192 | -4.150390 |
| C12 | 5.864593  | 23.954037 | -5.449907 |
| C13 | 4.528444  | 23.837522 | -5.251137 |
| C14 | 4.300004  | 23.982096 | -3.835159 |
| C15 | 2.776573  | 24.066449 | -1.863700 |
| C16 | 1.455853  | 24.035369 | -1.269131 |
| C17 | 1.624807  | 24.245157 | 0.061814  |
| C18 | 3.051355  | 24.395464 | 0.255302  |
| C19 | 5.014120  | 24.831247 | 1.716457  |
| C20 | 5.555372  | 25.114278 | 3.010641  |
| C21 | 6.896436  | 25.232944 | 2.872153  |
| C22 | 7.164330  | 25.054011 | 1.457518  |
| C23 | 8.640117  | 25.078851 | -0.558402 |
| C24 | 9.941052  | 25.217121 | -1.156858 |
| C25 | 9.802454  | 24.951685 | -2.481418 |
| C26 | 8.401285  | 24.680198 | -2.692012 |
| C27 | 7.811258  | 24.421280 | -3.934088 |
| H28 | 8.452735  | 24.422431 | -4.808585 |
| C29 | 3.032936  | 23.903586 | -3.236315 |
| H30 | 2.190746  | 23.699800 | -3.888326 |
| C31 | 3.644324  | 24.639913 | 1.499236  |
| H32 | 3.003290  | 24.742873 | 2.365973  |
| C33 | 8.398369  | 25.234507 | 0.813579  |
| H34 | 9.246277  | 25.563825 | 1.398696  |
| C35 | 8.214345  | 31.058994 | -2.674220 |
| C36 | 9.042449  | 31.395182 | -1.597856 |
| C37 | 9.448890  | 32.717419 | -1.379380 |
| C38 | 9.021550  | 33.745521 | -2.228580 |
| C39 | 8.178484  | 33.415270 | -3.294826 |
| C40 | 7.788118  | 32.097340 | -3.513205 |
| H41 | 7.139674  | 31.872671 | -4.362275 |
| H42 | 7.853883  | 34.204585 | -3.973373 |
| H43 | 10.105566 | 32.949248 | -0.539469 |
| H44 | 9.385366  | 30.612042 | -0.919087 |
| C45 | 9.448569  | 35.200052 | -1.993369 |
| C46 | 10.090285 | 35.751047 | -3.317704 |
| O47 | 11.312890 | 35.541422 | -3.451158 |



|     |           |           |           |
|-----|-----------|-----------|-----------|
| O48 | 9.348285  | 36.290572 | -4.116536 |
| H49 | 10.230480 | 35.201113 | -1.227384 |
| C50 | 8.264166  | 36.060483 | -1.515222 |
| H51 | 7.492823  | 36.082956 | -2.288970 |
| H52 | 8.587169  | 37.087646 | -1.307580 |
| H53 | 7.828601  | 35.640132 | -0.604056 |
| C54 | 7.860282  | 29.601850 | -2.959813 |
| C55 | 6.423638  | 29.321111 | -3.446874 |
| C56 | 5.404710  | 29.572284 | -2.326180 |
| C57 | 6.323678  | 27.876946 | -3.962777 |
| H58 | 7.031599  | 27.693850 | -4.780051 |
| H59 | 5.313476  | 27.656914 | -4.325365 |
| H60 | 6.534763  | 27.172537 | -3.154676 |
| H61 | 5.541537  | 30.564400 | -1.878657 |
| H62 | 5.517791  | 28.804614 | -1.552350 |
| H63 | 4.378359  | 29.500588 | -2.704521 |
| H64 | 6.203295  | 30.000034 | -4.282460 |
| H65 | 8.047493  | 29.001579 | -2.061568 |
| H66 | 8.550524  | 29.220992 | -3.725190 |
| H67 | 7.478079  | 20.847446 | -2.618868 |
| H68 | 6.423883  | 23.889256 | -6.392076 |
| H69 | 3.737203  | 23.710196 | -5.991244 |
| H70 | 0.540426  | 23.882289 | -1.843310 |
| H71 | 0.926082  | 24.315562 | 0.916107  |
| H72 | 4.949850  | 25.189665 | 3.907879  |
| H73 | 7.549756  | 25.392875 | 3.736984  |
| H74 | 10.822869 | 25.517365 | -0.586761 |
| H75 | 10.571250 | 24.951513 | -3.259947 |

Ibuprofen 3-1 Reactant Complex Quartet

|     |          |           |           |
|-----|----------|-----------|-----------|
| C1  | 6.485724 | 21.198986 | -2.303961 |
| S2  | 6.392490 | 22.239089 | -0.732921 |
| H3  | 5.875044 | 20.313860 | -2.105196 |
| H4  | 6.040289 | 21.765006 | -3.124470 |
| O5  | 5.452632 | 26.270416 | -1.384860 |
| Fe6 | 5.709786 | 24.651869 | -1.218674 |
| N7  | 5.481327 | 24.205528 | -3.172033 |
| N8  | 3.736085 | 24.284925 | -0.918926 |
| N9  | 6.000545 | 24.791163 | 0.776033  |
| N10 | 7.705243 | 24.749076 | -1.501021 |
| C11 | 6.459900 | 24.198874 | -4.155816 |
| C12 | 5.870548 | 23.954295 | -5.457107 |
| C13 | 4.520289 | 23.836065 | -5.255303 |
| C14 | 4.282610 | 23.981576 | -3.834318 |
| C15 | 2.770025 | 24.063644 | -1.881888 |
| C16 | 1.448515 | 24.033610 | -1.273691 |
| C17 | 1.620186 | 24.246147 | 0.071503  |
| C18 | 3.051469 | 24.398434 | 0.274052  |
| C19 | 4.998239 | 24.831493 | 1.721414  |
| C20 | 5.547830 | 25.121860 | 3.017652  |
| C21 | 6.903565 | 25.238114 | 2.879810  |
| C22 | 7.185195 | 25.056128 | 1.460715  |
| C23 | 8.644104 | 25.081463 | -0.539078 |
| C24 | 9.946410 | 25.219705 | -1.149417 |
| C25 | 9.806650 | 24.951694 | -2.486776 |
| C26 | 8.400903 | 24.675570 | -2.707813 |
| C27 | 7.813154 | 24.420232 | -3.935015 |
| H28 | 8.454808 | 24.420781 | -4.808269 |
| C29 | 3.031050 | 23.903470 | -3.236950 |

|     |           |           |           |
|-----|-----------|-----------|-----------|
| H30 | 2.190941  | 23.697591 | -3.890447 |
| C31 | 3.644819  | 24.639996 | 1.500403  |
| H32 | 3.002766  | 24.743163 | 2.365066  |
| C33 | 8.402354  | 25.234542 | 0.818226  |
| H34 | 9.250612  | 25.565423 | 1.401013  |
| C35 | 8.213811  | 31.057740 | -2.674769 |
| C36 | 9.048181  | 31.394708 | -1.594051 |
| C37 | 9.452931  | 32.720170 | -1.376495 |
| C38 | 9.021443  | 33.751153 | -2.227294 |
| C39 | 8.176753  | 33.422121 | -3.301574 |
| C40 | 7.785278  | 32.098665 | -3.520122 |
| H41 | 7.139993  | 31.873426 | -4.363146 |
| H42 | 7.854887  | 34.206999 | -3.977914 |
| H43 | 10.106160 | 32.954108 | -0.539138 |
| H44 | 9.388862  | 30.613530 | -0.919888 |
| C45 | 9.446102  | 35.202929 | -1.993508 |
| C46 | 10.084968 | 35.743502 | -3.292777 |
| O47 | 11.349512 | 35.534683 | -3.451385 |
| O48 | 9.318145  | 36.314907 | -4.153488 |
| H49 | 10.228265 | 35.204193 | -1.223371 |
| C50 | 8.262552  | 36.066410 | -1.515896 |
| H51 | 7.489443  | 36.090187 | -2.291231 |
| H52 | 8.590732  | 37.096020 | -1.313161 |
| H53 | 7.827801  | 35.649439 | -0.601029 |
| C54 | 7.863016  | 29.604759 | -2.958077 |
| C55 | 6.422165  | 29.322822 | -3.443727 |
| C56 | 5.401843  | 29.575102 | -2.320766 |
| C57 | 6.323903  | 27.874874 | -3.960130 |
| H58 | 7.036904  | 27.695053 | -4.776072 |
| H59 | 5.313564  | 27.653856 | -4.324480 |
| H60 | 6.534063  | 27.170454 | -3.150042 |
| H61 | 5.544692  | 30.566839 | -1.871674 |
| H62 | 5.512294  | 28.804290 | -1.547718 |
| H63 | 4.375319  | 29.507982 | -2.703652 |
| H64 | 6.199993  | 30.002209 | -4.282441 |
| H65 | 8.049138  | 29.002429 | -2.057997 |
| H66 | 8.549535  | 29.218511 | -3.727540 |
| H67 | 7.480441  | 20.843803 | -2.625018 |
| H68 | 6.425078  | 23.889866 | -6.394184 |
| H69 | 3.733652  | 23.709881 | -5.991587 |
| H70 | 0.536570  | 23.881977 | -1.842538 |
| H71 | 0.922883  | 24.317409 | 0.919289  |
| H72 | 4.948103  | 25.201313 | 3.910776  |
| H73 | 7.550436  | 25.397363 | 3.740877  |
| H74 | 10.823180 | 25.519920 | -0.582743 |
| H75 | 10.572615 | 24.952243 | -3.260307 |

Ibuprofen 3-1 Transition State Doublet

|     |          |           |           |
|-----|----------|-----------|-----------|
| C1  | 6.456761 | 21.242047 | -2.306312 |
| S2  | 6.361222 | 22.282646 | -0.779326 |
| H3  | 5.843744 | 20.352459 | -2.111013 |
| H4  | 6.017183 | 21.783888 | -3.151172 |
| O5  | 5.576699 | 26.432110 | -1.409436 |
| Fe6 | 5.767922 | 24.659361 | -1.304057 |
| N7  | 5.523972 | 24.275980 | -3.272320 |
| N8  | 3.760174 | 24.361030 | -0.998825 |
| N9  | 6.038150 | 24.844099 | 0.717869  |
| N10 | 7.764048 | 24.779215 | -1.592021 |
| C11 | 6.486967 | 24.224800 | -4.234274 |

|     |           |           |           |
|-----|-----------|-----------|-----------|
| C12 | 5.905775  | 23.964418 | -5.528045 |
| C13 | 4.569114  | 23.869392 | -5.326310 |
| C14 | 4.343584  | 24.051704 | -3.914445 |
| C15 | 2.814214  | 24.142928 | -1.942963 |
| C16 | 1.495790  | 24.079172 | -1.342420 |
| C17 | 1.669088  | 24.267051 | -0.009238 |
| C18 | 3.094477  | 24.435903 | 0.177424  |
| C19 | 5.060171  | 24.833409 | 1.646335  |
| C20 | 5.601249  | 25.058802 | 2.953600  |
| C21 | 6.940349  | 25.198523 | 2.815378  |
| C22 | 7.203665  | 25.075437 | 1.389381  |
| C23 | 8.676429  | 25.097046 | -0.636293 |
| C24 | 9.982773  | 25.219784 | -1.226680 |
| C25 | 9.848592  | 24.953134 | -2.552072 |
| C26 | 8.448150  | 24.693093 | -2.769933 |
| C27 | 7.860229  | 24.428496 | -4.015205 |
| H28 | 8.506133  | 24.403991 | -4.886069 |
| C29 | 3.072625  | 23.984636 | -3.315770 |
| H30 | 2.231720  | 23.775950 | -3.967946 |
| C31 | 3.690247  | 24.643136 | 1.425432  |
| H32 | 3.052101  | 24.710899 | 2.297341  |
| C33 | 8.435391  | 25.249593 | 0.739218  |
| H34 | 9.292401  | 25.556549 | 1.324548  |
| C35 | 8.173002  | 30.833988 | -2.606182 |
| C36 | 9.030081  | 31.200310 | -1.563092 |
| C37 | 9.450469  | 32.523617 | -1.398099 |
| C38 | 9.013307  | 33.531286 | -2.265925 |
| C39 | 8.145693  | 33.173999 | -3.304325 |
| C40 | 7.737659  | 31.848638 | -3.471575 |
| H41 | 7.060785  | 31.602642 | -4.290521 |
| H42 | 7.800887  | 33.946095 | -3.993571 |
| H43 | 10.122880 | 32.775899 | -0.574468 |
| H44 | 9.377400  | 30.438097 | -0.863235 |
| C45 | 9.432026  | 34.992064 | -2.042181 |
| C46 | 10.060441 | 35.593862 | -3.353080 |
| O47 | 11.284661 | 35.396179 | -3.499820 |
| O48 | 9.317095  | 36.173959 | -4.120473 |
| H49 | 10.223314 | 34.991884 | -1.285452 |
| C50 | 8.247759  | 35.835249 | -1.534085 |
| H51 | 7.472711  | 35.878507 | -2.302884 |
| H52 | 8.569657  | 36.857138 | -1.299745 |
| H53 | 7.819602  | 35.387555 | -0.632408 |
| C54 | 7.793566  | 29.365308 | -2.806280 |
| C55 | 6.356569  | 29.079172 | -3.292409 |
| C56 | 5.300316  | 29.603130 | -2.304267 |
| C57 | 6.159069  | 27.599341 | -3.574132 |
| H58 | 7.027458  | 27.061747 | -3.957727 |
| H59 | 5.236848  | 27.350227 | -4.101097 |
| H60 | 5.910958  | 26.949689 | -2.378583 |
| H61 | 5.478737  | 30.653822 | -2.049506 |
| H62 | 5.329429  | 28.997812 | -1.393813 |
| H63 | 4.292513  | 29.508879 | -2.723843 |
| H64 | 6.217526  | 29.606550 | -4.253286 |
| H65 | 7.958559  | 28.822636 | -1.869783 |
| H66 | 8.485594  | 28.920207 | -3.535045 |
| H67 | 7.448915  | 20.864399 | -2.641591 |
| H68 | 6.464512  | 23.881223 | -6.465879 |
| H69 | 3.771878  | 23.722719 | -6.055978 |
| H70 | 0.577975  | 23.907402 | -1.906892 |
| H71 | 0.977180  | 24.306688 | 0.853063  |

|     |           |           |           |
|-----|-----------|-----------|-----------|
| H72 | 4.991672  | 25.062362 | 3.852854  |
| H73 | 7.587918  | 25.337001 | 3.687343  |
| H74 | 10.863356 | 25.507593 | -0.649551 |
| H75 | 10.613038 | 24.938651 | -3.328514 |

Ibuprofen 3-1 Transition State Quartet

|     |           |           |           |
|-----|-----------|-----------|-----------|
| C1  | 6.459453  | 21.224735 | -2.318906 |
| S2  | 6.376216  | 22.306643 | -0.771110 |
| H3  | 5.848785  | 20.346060 | -2.093768 |
| H4  | 6.010989  | 21.771979 | -3.150528 |
| O5  | 5.520793  | 26.430719 | -1.494549 |
| Fe6 | 5.758102  | 24.675432 | -1.287471 |
| N7  | 5.522408  | 24.256156 | -3.248198 |
| N8  | 3.770059  | 24.370863 | -0.989545 |
| N9  | 6.024863  | 24.866056 | 0.699080  |
| N10 | 7.739982  | 24.792664 | -1.579068 |
| C11 | 6.500441  | 24.213290 | -4.230700 |
| C12 | 5.907986  | 23.954938 | -5.525432 |
| C13 | 4.556809  | 23.853787 | -5.321468 |
| C14 | 4.323120  | 24.030298 | -3.903916 |
| C15 | 2.804941  | 24.139886 | -1.953152 |
| C16 | 1.483483  | 24.080136 | -1.342572 |
| C17 | 1.656156  | 24.274284 | 0.003847  |
| C18 | 3.085729  | 24.449388 | 0.202270  |
| C19 | 5.030402  | 24.854501 | 1.652559  |
| C20 | 5.585320  | 25.081027 | 2.960928  |
| C21 | 6.939018  | 25.218616 | 2.819700  |
| C22 | 7.213819  | 25.098107 | 1.389444  |
| C23 | 8.674920  | 25.115675 | -0.613962 |
| C24 | 9.984135  | 25.226902 | -1.215395 |
| C25 | 9.846057  | 24.954966 | -2.551842 |
| C26 | 8.440212  | 24.694894 | -2.779354 |
| C27 | 7.856709  | 24.424161 | -4.007601 |
| H28 | 8.502785  | 24.400497 | -4.877457 |
| C29 | 3.067945  | 23.968784 | -3.305107 |
| H30 | 2.227758  | 23.753188 | -3.954574 |
| C31 | 3.680195  | 24.660593 | 1.433951  |
| H32 | 3.042639  | 24.723993 | 2.305740  |
| C33 | 8.430271  | 25.269246 | 0.746253  |
| H34 | 9.285912  | 25.572693 | 1.333768  |
| C35 | 8.179061  | 30.886202 | -2.624539 |
| C36 | 9.034588  | 31.246756 | -1.567309 |
| C37 | 9.452438  | 32.572698 | -1.389926 |
| C38 | 9.016301  | 33.589643 | -2.255753 |
| C39 | 8.151343  | 33.238914 | -3.308479 |
| C40 | 7.745693  | 31.910817 | -3.488830 |
| H41 | 7.078673  | 31.670548 | -4.311355 |
| H42 | 7.815333  | 34.013501 | -3.991670 |
| H43 | 10.117837 | 32.820916 | -0.564980 |
| H44 | 9.377613  | 30.482143 | -0.876417 |
| C45 | 9.436114  | 35.045408 | -2.029508 |
| C46 | 10.064388 | 35.628925 | -3.316778 |
| O47 | 11.332528 | 35.444244 | -3.480537 |
| O48 | 9.294202  | 36.228527 | -4.155418 |
| H49 | 10.227133 | 35.045402 | -1.267920 |
| C50 | 8.250686  | 35.892037 | -1.525848 |
| H51 | 7.476490  | 35.932544 | -2.299238 |
| H52 | 8.572964  | 36.917111 | -1.295370 |
| H53 | 7.819864  | 35.447587 | -0.621992 |

|     |           |           |           |
|-----|-----------|-----------|-----------|
| C54 | 7.813664  | 29.421718 | -2.843141 |
| C55 | 6.370006  | 29.130412 | -3.321522 |
| C56 | 5.322047  | 29.619601 | -2.301499 |
| C57 | 6.180962  | 27.651999 | -3.644369 |
| H58 | 7.057270  | 27.132897 | -4.045974 |
| H59 | 5.258682  | 27.418494 | -4.182422 |
| H60 | 5.908903  | 26.941706 | -2.448847 |
| H61 | 5.495808  | 30.669496 | -2.034246 |
| H62 | 5.376227  | 28.997912 | -1.401722 |
| H63 | 4.307663  | 29.520266 | -2.705491 |
| H64 | 6.213023  | 29.695280 | -4.261474 |
| H65 | 7.991754  | 28.863227 | -1.915661 |
| H66 | 8.500209  | 28.992911 | -3.590349 |
| H67 | 7.453383  | 20.858625 | -2.641729 |
| H68 | 6.462122  | 23.876897 | -6.458518 |
| H69 | 3.765837  | 23.715888 | -6.050322 |
| H70 | 0.571918  | 23.908444 | -1.904663 |
| H71 | 0.967750  | 24.314928 | 0.860445  |
| H72 | 4.983842  | 25.087563 | 3.857187  |
| H73 | 7.583593  | 25.350738 | 3.687326  |
| H74 | 10.861620 | 25.510825 | -0.643219 |
| H75 | 10.607029 | 24.940830 | -3.322959 |

Ibuprofen 3-2 Reactant Complex Doublet

|     |          |           |           |
|-----|----------|-----------|-----------|
| C1  | 6.459291 | 21.153081 | -2.350573 |
| S2  | 6.337786 | 22.206785 | -0.855665 |
| H3  | 5.823563 | 20.280134 | -2.165687 |
| H4  | 6.053481 | 21.696532 | -3.205870 |
| O5  | 5.512908 | 26.303055 | -1.457786 |
| Fe6 | 5.690921 | 24.690972 | -1.245672 |
| N7  | 5.466953 | 24.223307 | -3.183403 |
| N8  | 3.712953 | 24.345818 | -0.940137 |
| N9  | 5.972096 | 24.826337 | 0.759638  |
| N10 | 7.693690 | 24.755781 | -1.503673 |
| C11 | 6.435074 | 24.249016 | -4.152475 |
| C12 | 5.856489 | 24.002035 | -5.450783 |
| C13 | 4.519780 | 23.837502 | -5.252013 |
| C14 | 4.285965 | 23.970311 | -3.833860 |
| C15 | 2.769008 | 24.073024 | -1.886648 |
| C16 | 1.447696 | 24.027459 | -1.289758 |
| C17 | 1.610892 | 24.280215 | 0.041563  |
| C18 | 3.033395 | 24.475183 | 0.236155  |
| C19 | 4.975344 | 24.899360 | 1.689345  |
| C20 | 5.522233 | 25.160806 | 2.990187  |
| C21 | 6.875666 | 25.225570 | 2.857305  |
| C22 | 7.144995 | 25.050507 | 1.440225  |
| C23 | 8.619625 | 25.066927 | -0.544495 |
| C24 | 9.922238 | 25.219119 | -1.144367 |
| C25 | 9.775971 | 24.988898 | -2.478993 |
| C26 | 8.374105 | 24.718677 | -2.698071 |
| C27 | 7.785344 | 24.490285 | -3.930184 |
| H28 | 8.425276 | 24.518238 | -4.802564 |
| C29 | 3.036907 | 23.873043 | -3.235830 |
| H30 | 2.204965 | 23.627949 | -3.882546 |
| C31 | 3.620100 | 24.734313 | 1.462356  |
| H32 | 2.976586 | 24.845504 | 2.323371  |
| C33 | 8.372517 | 25.207133 | 0.810502  |
| H34 | 9.219763 | 25.517005 | 1.403314  |
| C35 | 8.096937 | 31.020931 | -2.701332 |

|     |           |           |           |
|-----|-----------|-----------|-----------|
| C36 | 8.908715  | 31.123982 | -1.567300 |
| C37 | 9.422495  | 32.360076 | -1.153898 |
| C38 | 9.115761  | 33.531173 | -1.853688 |
| C39 | 8.277507  | 33.438658 | -2.972491 |
| C40 | 7.789742  | 32.202706 | -3.392671 |
| H41 | 7.162988  | 32.157100 | -4.277223 |
| H42 | 8.035556  | 34.335496 | -3.532102 |
| H43 | 10.063962 | 32.407780 | -0.278345 |
| H44 | 9.153136  | 30.231609 | -0.999037 |
| C45 | 9.670036  | 34.882322 | -1.396275 |
| C46 | 10.238776 | 35.618808 | -2.627947 |
| O47 | 11.451727 | 35.401226 | -2.947661 |
| O48 | 9.461124  | 36.346439 | -3.269024 |
| H49 | 10.489625 | 34.689145 | -0.698212 |
| C50 | 8.579853  | 35.720460 | -0.698817 |
| H51 | 8.985809  | 36.656104 | -0.295592 |
| H52 | 8.133684  | 35.159870 | 0.127241  |
| H53 | 7.796064  | 35.965077 | -1.416061 |
| C54 | 7.594742  | 29.676962 | -3.200488 |
| C55 | 6.073345  | 29.606725 | -3.452131 |
| C56 | 5.297097  | 29.792621 | -2.144330 |
| C57 | 5.691457  | 28.274460 | -4.114554 |
| H58 | 5.870260  | 27.444016 | -3.422969 |
| H59 | 6.266979  | 28.105157 | -5.031062 |
| H60 | 4.626877  | 28.265394 | -4.371826 |
| H61 | 5.595100  | 30.712990 | -1.632467 |
| H62 | 5.483231  | 28.934218 | -1.488303 |
| H63 | 4.219957  | 29.835132 | -2.337534 |
| H64 | 5.810246  | 30.424687 | -4.134641 |
| H65 | 7.872909  | 28.890986 | -2.489189 |
| H66 | 8.106208  | 29.441234 | -4.143082 |
| H67 | 7.463106  | 20.769076 | -2.646433 |
| H68 | 6.413844  | 23.961319 | -6.383198 |
| H69 | 3.740581  | 23.699767 | -5.994579 |
| H70 | 0.538964  | 23.842295 | -1.857072 |
| H71 | 0.911701  | 24.333018 | 0.889233  |
| H72 | 4.924684  | 25.222887 | 3.889035  |
| H73 | 7.532262  | 25.332038 | 3.721979  |
| H74 | 10.807041 | 25.499754 | -0.576377 |
| H75 | 10.530076 | 24.997732 | -3.256876 |

Ibuprofen 3-2 Reactant Complex Quartet

|     |          |           |           |
|-----|----------|-----------|-----------|
| C1  | 6.457553 | 21.159912 | -2.316439 |
| S2  | 6.328467 | 22.189479 | -0.785045 |
| H3  | 5.799086 | 20.290821 | -2.169980 |
| H4  | 6.071113 | 21.743292 | -3.162352 |
| O5  | 5.474609 | 26.317688 | -1.439652 |
| Fe6 | 5.680319 | 24.739593 | -1.231268 |
| N7  | 5.458091 | 24.232832 | -3.180886 |
| N8  | 3.695886 | 24.350911 | -0.919037 |
| N9  | 5.967414 | 24.849693 | 0.786209  |
| N10 | 7.697124 | 24.766299 | -1.490149 |
| C11 | 6.419746 | 24.253892 | -4.142775 |
| C12 | 5.844025 | 24.005300 | -5.439605 |
| C13 | 4.513496 | 23.845948 | -5.240695 |
| C14 | 4.282140 | 23.982801 | -3.825633 |
| C15 | 2.760275 | 24.079440 | -1.860152 |
| C16 | 1.441482 | 24.031157 | -1.266760 |
| C17 | 1.602979 | 24.282076 | 0.057737  |

|     |           |           |           |
|-----|-----------|-----------|-----------|
| C18 | 3.023710  | 24.477943 | 0.250355  |
| C19 | 4.978557  | 24.919325 | 1.712751  |
| C20 | 5.527112  | 25.177514 | 3.009772  |
| C21 | 6.872367  | 25.235735 | 2.874311  |
| C22 | 7.136542  | 25.061392 | 1.461155  |
| C23 | 8.620031  | 25.071868 | -0.537019 |
| C24 | 9.919513  | 25.221587 | -1.135501 |
| C25 | 9.772055  | 24.994373 | -2.463991 |
| C26 | 8.373324  | 24.725118 | -2.679196 |
| C27 | 7.786077  | 24.491696 | -3.927123 |
| H28 | 8.428504  | 24.512695 | -4.800613 |
| C29 | 3.019454  | 23.879096 | -3.226194 |
| H30 | 2.183291  | 23.628893 | -3.869453 |
| C31 | 3.607563  | 24.745531 | 1.493093  |
| H32 | 2.964743  | 24.853415 | 2.357117  |
| C33 | 8.379742  | 25.213848 | 0.832229  |
| H34 | 9.231252  | 25.516360 | 1.427905  |
| C35 | 8.104899  | 31.032829 | -2.717842 |
| C36 | 8.896990  | 31.133593 | -1.571586 |
| C37 | 9.400940  | 32.370434 | -1.149821 |
| C38 | 9.103354  | 33.540819 | -1.854951 |
| C39 | 8.284994  | 33.447071 | -2.987612 |
| C40 | 7.808714  | 32.211174 | -3.414471 |
| H41 | 7.198302  | 32.158557 | -4.317939 |
| H42 | 8.050767  | 34.347352 | -3.555683 |
| H43 | 10.034096 | 32.420398 | -0.261613 |
| H44 | 9.139335  | 30.235276 | -1.000451 |
| C45 | 9.657050  | 34.896009 | -1.390165 |
| C46 | 10.256114 | 35.635793 | -2.639449 |
| O47 | 11.442569 | 35.401740 | -2.919996 |
| O48 | 9.492426  | 36.344312 | -3.265514 |
| H49 | 10.472060 | 34.699310 | -0.686241 |
| C50 | 8.569149  | 35.747081 | -0.705406 |
| H51 | 8.985087  | 36.674136 | -0.287753 |
| H52 | 8.101686  | 35.186511 | 0.109468  |
| H53 | 7.800612  | 36.010609 | -1.432399 |
| C54 | 7.597881  | 29.693540 | -3.235589 |
| C55 | 6.072418  | 29.636082 | -3.473442 |
| C56 | 5.308009  | 29.769185 | -2.151666 |
| C57 | 5.686600  | 28.339382 | -4.200035 |
| H58 | 5.941125  | 27.468202 | -3.587370 |
| H59 | 6.199860  | 28.257851 | -5.166270 |
| H60 | 4.606144  | 28.307635 | -4.384885 |
| H61 | 5.606577  | 30.675582 | -1.612667 |
| H62 | 5.502809  | 28.891330 | -1.524184 |
| H63 | 4.227562  | 29.815587 | -2.333754 |
| H64 | 5.803543  | 30.486782 | -4.114273 |
| H65 | 7.879229  | 28.891868 | -2.541639 |
| H66 | 8.099164  | 29.475791 | -4.188707 |
| H67 | 7.458620  | 20.767615 | -2.625770 |
| H68 | 6.402392  | 23.958274 | -6.377565 |
| H69 | 3.733712  | 23.703068 | -5.988983 |
| H70 | 0.525839  | 23.853052 | -1.833860 |
| H71 | 0.898892  | 24.342541 | 0.906480  |
| H72 | 4.933595  | 25.264389 | 3.914032  |
| H73 | 7.536781  | 25.351113 | 3.736419  |
| H74 | 10.810434 | 25.499962 | -0.566844 |
| H75 | 10.532990 | 25.004714 | -3.243908 |

Ibuprofen 3-2 Transition State Doublet

|     |           |           |           |
|-----|-----------|-----------|-----------|
| C1  | 6.452960  | 21.225842 | -2.393626 |
| S2  | 6.313170  | 22.277243 | -0.889917 |
| H3  | 5.793960  | 20.366388 | -2.228795 |
| H4  | 6.080044  | 21.780021 | -3.257154 |
| O5  | 5.512796  | 26.465213 | -1.355828 |
| Fe6 | 5.714715  | 24.691315 | -1.302541 |
| N7  | 5.481986  | 24.348654 | -3.260374 |
| N8  | 3.725590  | 24.373984 | -1.008064 |
| N9  | 5.975162  | 24.849499 | 0.708444  |
| N10 | 7.698506  | 24.819180 | -1.571570 |
| C11 | 6.453905  | 24.335631 | -4.225974 |
| C12 | 5.879842  | 24.065609 | -5.521912 |
| C13 | 4.542043  | 23.905931 | -5.323764 |
| C14 | 4.305051  | 24.069274 | -3.909422 |
| C15 | 2.785143  | 24.105030 | -1.958083 |
| C16 | 1.463990  | 24.022214 | -1.364548 |
| C17 | 1.622557  | 24.256829 | -0.028728 |
| C18 | 3.042584  | 24.467687 | 0.168751  |
| C19 | 4.982009  | 24.881230 | 1.636201  |
| C20 | 5.521033  | 25.105253 | 2.948233  |
| C21 | 6.872167  | 25.190689 | 2.820498  |
| C22 | 7.144093  | 25.060034 | 1.394754  |
| C23 | 8.618034  | 25.110827 | -0.600464 |
| C24 | 9.928175  | 25.247258 | -1.186942 |
| C25 | 9.791671  | 25.018837 | -2.525029 |
| C26 | 8.389826  | 24.770611 | -2.757642 |
| C27 | 7.807829  | 24.549628 | -3.995564 |
| H28 | 8.458111  | 24.551485 | -4.861560 |
| C29 | 3.058272  | 23.940401 | -3.311476 |
| H30 | 2.230608  | 23.679179 | -3.958005 |
| C31 | 3.626487  | 24.707390 | 1.400469  |
| H32 | 2.984026  | 24.789214 | 2.264462  |
| C33 | 8.367919  | 25.230964 | 0.759719  |
| H34 | 9.218665  | 25.522411 | 1.356904  |
| C35 | 8.138683  | 30.772658 | -2.413345 |
| C36 | 9.030135  | 30.979681 | -1.354910 |
| C37 | 9.531807  | 32.250694 | -1.058819 |
| C38 | 9.140470  | 33.369356 | -1.803316 |
| C39 | 8.237016  | 33.176072 | -2.856559 |
| C40 | 7.751789  | 31.897873 | -3.158414 |
| H41 | 7.055107  | 31.781855 | -3.982572 |
| H42 | 7.923370  | 34.030508 | -3.448140 |
| H43 | 10.221232 | 32.374344 | -0.228837 |
| H44 | 9.337149  | 30.135023 | -0.747320 |
| C45 | 9.653112  | 34.759785 | -1.413078 |
| C46 | 10.181878 | 35.516858 | -2.648567 |
| O47 | 11.401496 | 35.349653 | -2.973343 |
| O48 | 9.374509  | 36.235973 | -3.267904 |
| H49 | 10.493280 | 34.614394 | -0.727398 |
| C50 | 8.553607  | 35.578787 | -0.707956 |
| H51 | 8.941258  | 36.539972 | -0.350191 |
| H52 | 8.153439  | 35.033489 | 0.150268  |
| H53 | 7.740621  | 35.775967 | -1.406580 |
| C54 | 7.678360  | 29.353638 | -2.738040 |
| C55 | 6.217493  | 29.181361 | -3.206391 |
| C56 | 5.215979  | 29.752829 | -2.190984 |
| C57 | 5.910262  | 27.729661 | -3.528653 |
| H58 | 5.764003  | 26.979584 | -2.327658 |
| H59 | 6.694940  | 27.171641 | -4.038579 |



|     |           |           |           |
|-----|-----------|-----------|-----------|
| H60 | 4.919322  | 27.557920 | -3.951254 |
| H61 | 5.460141  | 30.786003 | -1.933898 |
| H62 | 5.236371  | 29.140369 | -1.284323 |
| H63 | 4.197500  | 29.720460 | -2.590770 |
| H64 | 6.101503  | 29.746366 | -4.147411 |
| H65 | 7.833923  | 28.722270 | -1.856767 |
| H66 | 8.328946  | 28.941620 | -3.520489 |
| H67 | 7.452457  | 20.813356 | -2.676088 |
| H68 | 6.444434  | 23.999529 | -6.445412 |
| H69 | 3.762238  | 23.732601 | -6.057142 |
| H70 | 0.559997  | 23.823603 | -1.935542 |
| H71 | 0.924491  | 24.297425 | 0.820257  |
| H72 | 4.911847  | 25.131714 | 3.841277  |
| H73 | 7.523928  | 25.288248 | 3.688910  |
| H74 | 10.810397 | 25.515154 | -0.610897 |
| H75 | 10.547075 | 25.010397 | -3.297600 |

Ibuprofen 3-2 Transition State Quartet

|     |          |           |           |
|-----|----------|-----------|-----------|
| C1  | 6.465835 | 21.214586 | -2.414978 |
| S2  | 6.342474 | 22.263961 | -0.897228 |
| H3  | 5.794373 | 20.354958 | -2.269796 |
| H4  | 6.107555 | 21.785906 | -3.280888 |
| O5  | 5.441374 | 26.441716 | -1.420792 |
| Fe6 | 5.704908 | 24.680146 | -1.271538 |
| N7  | 5.475201 | 24.307851 | -3.255614 |
| N8  | 3.706498 | 24.343479 | -0.976882 |
| N9  | 5.967530 | 24.840451 | 0.736007  |
| N10 | 7.702398 | 24.824207 | -1.550959 |
| C11 | 6.437523 | 24.311840 | -4.212762 |
| C12 | 5.867574 | 24.056871 | -5.510060 |
| C13 | 4.534070 | 23.900823 | -5.311823 |
| C14 | 4.304660 | 24.048891 | -3.897000 |
| C15 | 2.775230 | 24.085686 | -1.927575 |
| C16 | 1.453794 | 24.010248 | -1.338177 |
| C17 | 1.608993 | 24.240521 | -0.009787 |
| C18 | 3.029091 | 24.441089 | 0.188106  |
| C19 | 4.979491 | 24.862856 | 1.663394  |
| C20 | 5.522243 | 25.087268 | 2.971248  |
| C21 | 6.865691 | 25.177668 | 2.839849  |
| C22 | 7.133821 | 25.051413 | 1.416664  |
| C23 | 8.616596 | 25.116754 | -0.591757 |
| C24 | 9.923556 | 25.254780 | -1.179461 |
| C25 | 9.784634 | 25.024437 | -2.510038 |
| C26 | 8.385112 | 24.772123 | -2.735718 |
| C27 | 7.807464 | 24.540619 | -3.987160 |
| H28 | 8.457797 | 24.553632 | -4.855738 |
| C29 | 3.039774 | 23.924067 | -3.296629 |
| H30 | 2.206630 | 23.678836 | -3.945966 |
| C31 | 3.612463 | 24.685265 | 1.438454  |
| H32 | 2.968712 | 24.767761 | 2.304442  |
| C33 | 8.371622 | 25.235805 | 0.785241  |
| H34 | 9.221603 | 25.533409 | 1.384440  |
| C35 | 8.144633 | 30.725251 | -2.363037 |
| C36 | 9.043747 | 30.936790 | -1.313646 |
| C37 | 9.543850 | 32.208931 | -1.026262 |
| C38 | 9.142780 | 33.323011 | -1.772459 |
| C39 | 8.232063 | 33.123059 | -2.816421 |
| C40 | 7.747443 | 31.844582 | -3.107758 |
| H41 | 7.036759 | 31.720970 | -3.927032 |

|     |           |           |           |
|-----|-----------|-----------|-----------|
| H42 | 7.908792  | 33.979921 | -3.411079 |
| H43 | 10.242289 | 32.340014 | -0.196829 |
| H44 | 9.357040  | 30.088742 | -0.703887 |
| C45 | 9.647303  | 34.723229 | -1.386608 |
| C46 | 10.209118 | 35.484893 | -2.642989 |
| O47 | 11.405161 | 35.303218 | -2.922907 |
| O48 | 9.420222  | 36.182466 | -3.249570 |
| H49 | 10.480365 | 34.586497 | -0.689547 |
| C50 | 8.533757  | 35.548028 | -0.711200 |
| H51 | 8.914804  | 36.509564 | -0.343235 |
| H52 | 8.106681  | 35.003894 | 0.135721  |
| H53 | 7.741708  | 35.747806 | -1.433392 |
| C54 | 7.680706  | 29.301973 | -2.680614 |
| C55 | 6.241614  | 29.140016 | -3.214822 |
| C56 | 5.202710  | 29.706197 | -2.231797 |
| C57 | 5.954937  | 27.691132 | -3.565055 |
| H58 | 5.735056  | 26.965488 | -2.363911 |
| H59 | 6.774952  | 27.134724 | -4.020181 |
| H60 | 4.993169  | 27.512222 | -4.048416 |
| H61 | 5.421711  | 30.750000 | -1.982764 |
| H62 | 5.211003  | 29.110172 | -1.314266 |
| H63 | 4.192534  | 29.652240 | -2.653853 |
| H64 | 6.164828  | 29.712815 | -4.156800 |
| H65 | 7.783302  | 28.684984 | -1.781208 |
| H66 | 8.365136  | 28.864247 | -3.421861 |
| H67 | 7.466094  | 20.798945 | -2.692817 |
| H68 | 6.431927  | 23.991715 | -6.440328 |
| H69 | 3.753840  | 23.733695 | -6.052972 |
| H70 | 0.544593  | 23.818433 | -1.912748 |
| H71 | 0.907065  | 24.287506 | 0.840467  |
| H72 | 4.912660  | 25.124746 | 3.869573  |
| H73 | 7.523407  | 25.279086 | 3.709248  |
| H74 | 10.813353 | 25.519473 | -0.604911 |
| H75 | 10.544664 | 25.012123 | -3.287342 |

Ibuprofen 3-3 Reactant Complex Doublet

|     |          |           |           |
|-----|----------|-----------|-----------|
| C1  | 6.494962 | 21.153554 | -2.247888 |
| S2  | 6.397402 | 22.190949 | -0.733297 |
| H3  | 5.901565 | 20.253790 | -2.049978 |
| H4  | 6.038177 | 21.685893 | -3.084090 |
| O5  | 5.521122 | 26.250529 | -1.486058 |
| Fe6 | 5.726161 | 24.647985 | -1.219165 |
| N7  | 5.487093 | 24.169948 | -3.157445 |
| N8  | 3.754159 | 24.292512 | -0.898152 |
| N9  | 6.016120 | 24.815690 | 0.784297  |
| N10 | 7.725909 | 24.751528 | -1.493128 |
| C11 | 6.448120 | 24.209262 | -4.131350 |
| C12 | 5.859921 | 23.992506 | -5.429953 |
| C13 | 4.523542 | 23.831443 | -5.226021 |
| C14 | 4.300451 | 23.944972 | -3.804561 |
| C15 | 2.800014 | 24.047009 | -1.842490 |
| C16 | 1.482396 | 23.999804 | -1.240302 |
| C17 | 1.655332 | 24.222726 | 0.094792  |
| C18 | 3.081637 | 24.400101 | 0.282250  |
| C19 | 5.032388 | 24.818391 | 1.728154  |
| C20 | 5.583678 | 25.053010 | 3.033573  |
| C21 | 6.928825 | 25.185294 | 2.886178  |
| C22 | 7.189873 | 25.065302 | 1.458102  |
| C23 | 8.648021 | 25.111368 | -0.550014 |

|     |           |           |           |
|-----|-----------|-----------|-----------|
| C24 | 9.945573  | 25.268072 | -1.163690 |
| C25 | 9.801067  | 24.976998 | -2.489768 |
| C26 | 8.400868  | 24.685210 | -2.689397 |
| C27 | 7.801571  | 24.443734 | -3.914628 |
| H28 | 8.433173  | 24.471973 | -4.792704 |
| C29 | 3.053473  | 23.863893 | -3.195884 |
| H30 | 2.207981  | 23.644621 | -3.833751 |
| C31 | 3.677829  | 24.630014 | 1.511017  |
| H32 | 3.043771  | 24.706291 | 2.382524  |
| C33 | 8.402896  | 25.266338 | 0.809795  |
| H34 | 9.243350  | 25.606372 | 1.396332  |
| C35 | 8.069680  | 31.720712 | -3.208104 |
| C36 | 8.944871  | 31.583280 | -2.121171 |
| C37 | 9.398070  | 32.705032 | -1.413681 |
| C38 | 8.998977  | 34.001694 | -1.768260 |
| C39 | 8.156556  | 34.141068 | -2.872574 |
| C40 | 7.696301  | 33.023028 | -3.568566 |
| H41 | 7.017058  | 33.159511 | -4.404096 |
| H42 | 7.833408  | 35.129468 | -3.170679 |
| H43 | 10.043738 | 32.557226 | -0.554265 |
| H44 | 9.261679  | 30.601995 | -1.795451 |
| C45 | 9.384323  | 35.192201 | -0.895781 |
| C46 | 10.465614 | 36.134277 | -1.452138 |
| O47 | 11.466135 | 36.327835 | -0.690067 |
| O48 | 10.312338 | 36.698999 | -2.563496 |
| H49 | 9.804687  | 34.795947 | 0.031756  |
| C50 | 8.159087  | 36.061324 | -0.532982 |
| H51 | 7.738423  | 36.518457 | -1.431729 |
| H52 | 8.447780  | 36.857383 | 0.159033  |
| H53 | 7.379722  | 35.451569 | -0.070050 |
| C54 | 7.515025  | 30.544108 | -4.001249 |
| C55 | 6.995621  | 29.323343 | -3.191749 |
| C56 | 8.082911  | 28.265734 | -2.940981 |
| C57 | 5.819622  | 28.642582 | -3.915689 |
| H58 | 4.981563  | 29.332448 | -4.057485 |
| H59 | 5.479149  | 27.779286 | -3.335890 |
| H60 | 6.136211  | 28.287657 | -4.905520 |
| H61 | 7.662673  | 27.427683 | -2.377693 |
| H62 | 8.940023  | 28.658440 | -2.391304 |
| H63 | 8.450083  | 27.877686 | -3.900474 |
| H64 | 6.632401  | 29.689315 | -2.225975 |
| H65 | 8.278635  | 30.187209 | -4.707146 |
| H66 | 6.698455  | 30.929098 | -4.621275 |
| H67 | 7.495792  | 20.806172 | -2.590167 |
| H68 | 6.406708  | 23.960625 | -6.368601 |
| H69 | 3.744525  | 23.699036 | -5.971031 |
| H70 | 0.573184  | 23.849876 | -1.818082 |
| H71 | 0.966294  | 24.272676 | 0.949303  |
| H72 | 4.982272  | 25.071322 | 3.938885  |
| H73 | 7.587535  | 25.297446 | 3.749980  |
| H74 | 10.823556 | 25.598332 | -0.612345 |
| H75 | 10.551405 | 24.965331 | -3.281039 |

Ibuprofen 3-3 Reactant Complex Quartet

|    |          |           |           |
|----|----------|-----------|-----------|
| C1 | 6.520950 | 21.160958 | -2.203165 |
| S2 | 6.441801 | 22.201279 | -0.667706 |
| H3 | 5.904644 | 20.268608 | -2.014214 |
| H4 | 6.069452 | 21.720295 | -3.032075 |
| O5 | 5.484626 | 26.318001 | -1.481907 |

|     |           |           |           |
|-----|-----------|-----------|-----------|
| Fe6 | 5.702504  | 24.747996 | -1.220871 |
| N7  | 5.470038  | 24.200853 | -3.163273 |
| N8  | 3.725970  | 24.346595 | -0.896768 |
| N9  | 5.997795  | 24.895757 | 0.795297  |
| N10 | 7.717046  | 24.785757 | -1.492267 |
| C11 | 6.426513  | 24.221319 | -4.130340 |
| C12 | 5.843577  | 23.994210 | -5.426299 |
| C13 | 4.511308  | 23.842759 | -5.223441 |
| C14 | 4.289468  | 23.972804 | -3.807103 |
| C15 | 2.779907  | 24.091631 | -1.834522 |
| C16 | 1.465327  | 24.038354 | -1.234360 |
| C17 | 1.636245  | 24.266896 | 0.093131  |
| C18 | 3.058470  | 24.458724 | 0.276834  |
| C19 | 5.017760  | 24.907987 | 1.733457  |
| C20 | 5.571241  | 25.140195 | 3.035130  |
| C21 | 6.910830  | 25.251847 | 2.888312  |
| C22 | 7.168304  | 25.129271 | 1.463995  |
| C23 | 8.638998  | 25.135516 | -0.554071 |
| C24 | 9.935474  | 25.267336 | -1.163888 |
| C25 | 9.790366  | 24.974038 | -2.483053 |
| C26 | 8.391920  | 24.697922 | -2.681858 |
| C27 | 7.796450  | 24.446819 | -3.921862 |
| H28 | 8.430530  | 24.460450 | -4.801561 |
| C29 | 3.026602  | 23.894556 | -3.202121 |
| H30 | 2.180807  | 23.668229 | -3.841448 |
| C31 | 3.650860  | 24.708359 | 1.519807  |
| H32 | 3.010500  | 24.791505 | 2.390131  |
| C33 | 8.400808  | 25.308718 | 0.817582  |
| H34 | 9.248327  | 25.642294 | 1.404069  |
| C35 | 8.032153  | 31.662414 | -3.252478 |
| C36 | 8.939640  | 31.542554 | -2.190335 |
| C37 | 9.387347  | 32.670308 | -1.493954 |
| C38 | 8.951800  | 33.958658 | -1.831803 |
| C39 | 8.073178  | 34.080168 | -2.908023 |
| C40 | 7.617805  | 32.956266 | -3.596938 |
| H41 | 6.905588  | 33.080084 | -4.413136 |
| H42 | 7.712953  | 35.067338 | -3.189768 |
| H43 | 10.061989 | 32.533589 | -0.645862 |
| H44 | 9.284795  | 30.560943 | -1.876502 |
| C45 | 9.334520  | 35.157857 | -0.958116 |
| C46 | 10.437951 | 36.129734 | -1.501481 |
| O47 | 11.395903 | 36.304174 | -0.728249 |
| O48 | 10.281373 | 36.688996 | -2.587186 |
| H49 | 9.758663  | 34.762799 | -0.031381 |
| C50 | 8.108933  | 36.028040 | -0.592790 |
| H51 | 7.664308  | 36.459003 | -1.493974 |
| H52 | 8.401545  | 36.844989 | 0.074866  |
| H53 | 7.345878  | 35.421873 | -0.097252 |
| C54 | 7.484612  | 30.464278 | -4.027843 |
| C55 | 7.013816  | 29.237359 | -3.192642 |
| C56 | 8.129248  | 28.198213 | -2.986485 |
| C57 | 5.814677  | 28.533204 | -3.850907 |
| H58 | 4.968386  | 29.218060 | -3.988396 |
| H59 | 5.493928  | 27.692604 | -3.223136 |
| H60 | 6.097775  | 28.137925 | -4.836872 |
| H61 | 7.757559  | 27.363629 | -2.383504 |
| H62 | 9.012541  | 28.614430 | -2.494194 |
| H63 | 8.445470  | 27.795585 | -3.957429 |
| H64 | 6.692212  | 29.604698 | -2.210461 |
| H65 | 8.243422  | 30.118426 | -4.745703 |

|     |           |           |           |
|-----|-----------|-----------|-----------|
| H66 | 6.645081  | 30.823080 | -4.634839 |
| H67 | 7.515383  | 20.795760 | -2.564172 |
| H68 | 6.392630  | 23.959696 | -6.368390 |
| H69 | 3.731803  | 23.711507 | -5.975860 |
| H70 | 0.552313  | 23.870207 | -1.810160 |
| H71 | 0.943038  | 24.306593 | 0.950645  |
| H72 | 4.974494  | 25.153572 | 3.949932  |
| H73 | 7.579187  | 25.341785 | 3.754336  |
| H74 | 10.821533 | 25.585655 | -0.610204 |
| H75 | 10.545931 | 24.962937 | -3.275706 |

Ibuprofen 3-3 Transition State Doublet

|     |           |           |           |
|-----|-----------|-----------|-----------|
| C1  | 6.480371  | 21.229285 | -2.238157 |
| S2  | 6.418528  | 22.295216 | -0.738659 |
| H3  | 5.870453  | 20.347237 | -2.014795 |
| H4  | 6.022060  | 21.751944 | -3.080227 |
| O5  | 5.541342  | 26.429388 | -1.389251 |
| Fe6 | 5.769582  | 24.728263 | -1.278243 |
| N7  | 5.525061  | 24.303389 | -3.220744 |
| N8  | 3.790223  | 24.368015 | -0.961615 |
| N9  | 6.051472  | 24.880504 | 0.733427  |
| N10 | 7.757564  | 24.830025 | -1.556848 |
| C11 | 6.489948  | 24.298723 | -4.194157 |
| C12 | 5.904619  | 24.039187 | -5.487064 |
| C13 | 4.568046  | 23.882356 | -5.279636 |
| C14 | 4.342028  | 24.045081 | -3.864947 |
| C15 | 2.836946  | 24.114690 | -1.904771 |
| C16 | 1.522818  | 24.026328 | -1.297822 |
| C17 | 1.697229  | 24.238649 | 0.039423  |
| C18 | 3.120562  | 24.441955 | 0.223967  |
| C19 | 5.073049  | 24.834174 | 1.676903  |
| C20 | 5.625571  | 25.012520 | 2.990756  |
| C21 | 6.969162  | 25.168903 | 2.845455  |
| C22 | 7.225068  | 25.110292 | 1.409564  |
| C23 | 8.678834  | 25.172851 | -0.603363 |
| C24 | 9.982500  | 25.306983 | -1.208766 |
| C25 | 9.843822  | 25.009081 | -2.535226 |
| C26 | 8.441954  | 24.742023 | -2.745053 |
| C27 | 7.846904  | 24.509017 | -3.975111 |
| H28 | 8.483989  | 24.517973 | -4.848824 |
| C29 | 3.092799  | 23.949124 | -3.258858 |
| H30 | 2.252906  | 23.717211 | -3.899623 |
| C31 | 3.717656  | 24.644807 | 1.454909  |
| H32 | 3.083891  | 24.697308 | 2.329539  |
| C33 | 8.435408  | 25.322000 | 0.757532  |
| H34 | 9.278546  | 25.661488 | 1.342450  |
| C35 | 7.933269  | 31.507213 | -2.956442 |
| C36 | 8.773497  | 31.435769 | -1.839447 |
| C37 | 9.298393  | 32.596283 | -1.250949 |
| C38 | 9.002276  | 33.872485 | -1.747091 |
| C39 | 8.206267  | 33.942052 | -2.896100 |
| C40 | 7.683462  | 32.786610 | -3.480034 |
| H41 | 7.032953  | 32.882848 | -4.345036 |
| H42 | 7.965706  | 34.910068 | -3.317695 |
| H43 | 9.911715  | 32.495414 | -0.360144 |
| H44 | 8.998836  | 30.483885 | -1.377657 |
| C45 | 9.393397  | 35.110865 | -0.936869 |
| C46 | 10.460556 | 36.074212 | -1.496859 |
| O47 | 11.445500 | 36.297532 | -0.720471 |

|     |           |           |           |
|-----|-----------|-----------|-----------|
| O48 | 10.306328 | 36.643138 | -2.605979 |
| H49 | 9.812088  | 34.752177 | 0.006315  |
| C50 | 8.152674  | 35.973028 | -0.603698 |
| H51 | 7.704604  | 36.361653 | -1.521177 |
| H52 | 8.434508  | 36.815900 | 0.034646  |
| H53 | 7.398233  | 35.374339 | -0.087966 |
| C54 | 7.255357  | 30.295066 | -3.609569 |
| C55 | 7.098615  | 29.019752 | -2.734430 |
| C56 | 8.373658  | 28.172569 | -2.742652 |
| C57 | 5.916922  | 28.142392 | -3.143966 |
| H58 | 4.962628  | 28.677013 | -3.135075 |
| H59 | 5.775448  | 27.223367 | -2.296188 |
| H60 | 6.068030  | 27.654077 | -4.112538 |
| H61 | 8.281338  | 27.343423 | -2.041700 |
| H62 | 9.252512  | 28.759180 | -2.476882 |
| H63 | 8.537811  | 27.752893 | -3.742439 |
| H64 | 6.915091  | 29.369801 | -1.716108 |
| H65 | 7.807162  | 30.023713 | -4.520286 |
| H66 | 6.265834  | 30.622867 | -3.945389 |
| H67 | 7.473114  | 20.858141 | -2.581476 |
| H68 | 6.450614  | 23.979093 | -6.423232 |
| H69 | 3.790488  | 23.700051 | -6.017117 |
| H70 | 0.616081  | 23.843494 | -1.868970 |
| H71 | 1.010106  | 24.265276 | 0.897301  |
| H72 | 5.025641  | 24.941887 | 3.892532  |
| H73 | 7.627426  | 25.249725 | 3.710788  |
| H74 | 10.854713 | 25.643007 | -0.653752 |
| H75 | 10.592876 | 24.982605 | -3.323456 |

Ibuprofen 3-3 Transition State Quartet

|     |          |           |           |
|-----|----------|-----------|-----------|
| C1  | 6.497558 | 21.250239 | -2.307408 |
| S2  | 6.428094 | 22.307482 | -0.786535 |
| H3  | 5.863287 | 20.370894 | -2.118935 |
| H4  | 6.073590 | 21.802303 | -3.155910 |
| O5  | 5.466365 | 26.471321 | -1.399096 |
| Fe6 | 5.756644 | 24.710281 | -1.256574 |
| N7  | 5.506417 | 24.319615 | -3.237579 |
| N8  | 3.764454 | 24.353499 | -0.942123 |
| N9  | 6.037203 | 24.871807 | 0.751518  |
| N10 | 7.751180 | 24.863900 | -1.559665 |
| C11 | 6.462944 | 24.317701 | -4.203327 |
| C12 | 5.882278 | 24.052966 | -5.493671 |
| C13 | 4.551566 | 23.894760 | -5.284903 |
| C14 | 4.331965 | 24.059773 | -3.870642 |
| C15 | 2.820125 | 24.114818 | -1.886111 |
| C16 | 1.504384 | 24.032560 | -1.283445 |
| C17 | 1.676014 | 24.234282 | 0.045967  |
| C18 | 3.099770 | 24.423372 | 0.231285  |
| C19 | 5.067257 | 24.818974 | 1.695479  |
| C20 | 5.623966 | 25.005417 | 3.004440  |
| C21 | 6.958535 | 25.163342 | 2.854038  |
| C22 | 7.207804 | 25.102447 | 1.420187  |
| C23 | 8.666702 | 25.193750 | -0.615251 |
| C24 | 9.970447 | 25.321915 | -1.216355 |
| C25 | 9.830274 | 25.027778 | -2.537392 |
| C26 | 8.430132 | 24.769664 | -2.744749 |
| C27 | 7.836337 | 24.531158 | -3.989191 |
| H28 | 8.477114 | 24.531971 | -4.864852 |
| C29 | 3.069059 | 23.952905 | -3.257213 |

|     |           |           |           |
|-----|-----------|-----------|-----------|
| H30 | 2.226350  | 23.716955 | -3.896713 |
| C31 | 3.700003  | 24.621696 | 1.481978  |
| H32 | 3.065806  | 24.659607 | 2.359243  |
| C33 | 8.430350  | 25.326919 | 0.765661  |
| H34 | 9.279621  | 25.649583 | 1.352653  |
| C35 | 7.904668  | 31.514782 | -2.985172 |
| C36 | 8.726514  | 31.425314 | -1.856780 |
| C37 | 9.260418  | 32.574791 | -1.258143 |
| C38 | 8.991750  | 33.853967 | -1.754788 |
| C39 | 8.219065  | 33.941013 | -2.918317 |
| C40 | 7.685918  | 32.797615 | -3.511892 |
| H41 | 7.049612  | 32.905534 | -4.393177 |
| H42 | 8.007526  | 34.918648 | -3.346452 |
| H43 | 9.864284  | 32.460232 | -0.354387 |
| H44 | 8.931266  | 30.461232 | -1.395603 |
| C45 | 9.371767  | 35.093418 | -0.931764 |
| C46 | 10.456342 | 36.086528 | -1.484250 |
| O47 | 11.405625 | 36.287048 | -0.706435 |
| O48 | 10.291989 | 36.641602 | -2.570473 |
| H49 | 9.793121  | 34.735290 | 0.011559  |
| C50 | 8.115208  | 35.938659 | -0.606001 |
| H51 | 7.669520  | 36.321322 | -1.528303 |
| H52 | 8.369431  | 36.785779 | 0.040363  |
| H53 | 7.366207  | 35.321673 | -0.101698 |
| C54 | 7.210038  | 30.314565 | -3.652047 |
| C55 | 7.060522  | 29.017251 | -2.796965 |
| C56 | 8.344192  | 28.179811 | -2.806159 |
| C57 | 5.901912  | 28.160392 | -3.263473 |
| H58 | 4.908892  | 28.607901 | -3.189443 |
| H59 | 5.734129  | 27.101664 | -2.280947 |
| H60 | 6.063962  | 27.611135 | -4.194067 |
| H61 | 8.275642  | 27.369885 | -2.079118 |
| H62 | 9.226582  | 28.780998 | -2.578032 |
| H63 | 8.487908  | 27.731239 | -3.796829 |
| H64 | 6.850952  | 29.343360 | -1.772540 |
| H65 | 7.745401  | 30.052642 | -4.576546 |
| H66 | 6.215939  | 30.653181 | -3.967980 |
| H67 | 7.492801  | 20.862267 | -2.634949 |
| H68 | 6.431690  | 23.986172 | -6.433489 |
| H69 | 3.773576  | 23.709330 | -6.027160 |
| H70 | 0.591531  | 23.863786 | -1.860166 |
| H71 | 0.984847  | 24.264337 | 0.906202  |
| H72 | 5.024107  | 24.955370 | 3.914286  |
| H73 | 7.625603  | 25.253859 | 3.718205  |
| H74 | 10.851458 | 25.649899 | -0.661164 |
| H75 | 10.586082 | 24.992168 | -3.326798 |

Ibuprofen 3-4 Reactant Complex Doublet

|     |          |           |           |
|-----|----------|-----------|-----------|
| C1  | 6.636281 | 21.159441 | -2.177718 |
| S2  | 6.536324 | 22.278870 | -0.725705 |
| H3  | 6.007272 | 20.297767 | -1.931022 |
| H4  | 6.201359 | 21.670600 | -3.038415 |
| O5  | 5.480619 | 26.299896 | -1.555244 |
| Fe6 | 5.713165 | 24.704502 | -1.304886 |
| N7  | 5.490500 | 24.186503 | -3.242223 |
| N8  | 3.740616 | 24.329378 | -0.997345 |
| N9  | 5.997317 | 24.875312 | 0.696356  |
| N10 | 7.704284 | 24.817906 | -1.572060 |
| C11 | 6.456584 | 24.200957 | -4.214751 |

|     |           |           |           |
|-----|-----------|-----------|-----------|
| C12 | 5.879147  | 23.951757 | -5.514154 |
| C13 | 4.537895  | 23.825745 | -5.315233 |
| C14 | 4.305019  | 23.972081 | -3.897315 |
| C15 | 2.787845  | 24.108921 | -1.950686 |
| C16 | 1.465904  | 24.073752 | -1.354087 |
| C17 | 1.633853  | 24.280508 | -0.015977 |
| C18 | 3.061077  | 24.443384 | 0.180558  |
| C19 | 5.006801  | 24.857179 | 1.633150  |
| C20 | 5.546065  | 25.102099 | 2.938309  |
| C21 | 6.890676  | 25.281923 | 2.797524  |
| C22 | 7.161359  | 25.153655 | 1.373985  |
| C23 | 8.625968  | 25.176165 | -0.624120 |
| C24 | 9.925583  | 25.316770 | -1.230672 |
| C25 | 9.780241  | 25.039864 | -2.558944 |
| C26 | 8.383356  | 24.750928 | -2.766929 |
| C27 | 7.799132  | 24.477696 | -3.992982 |
| H28 | 8.432723  | 24.518804 | -4.868728 |
| C29 | 3.050105  | 23.929852 | -3.303313 |
| H30 | 2.208487  | 23.737672 | -3.955486 |
| C31 | 3.652486  | 24.669335 | 1.409126  |
| H32 | 3.012475  | 24.752875 | 2.276281  |
| C33 | 8.377130  | 25.351171 | 0.729662  |
| H34 | 9.217884  | 25.703172 | 1.307876  |
| C35 | 8.166996  | 30.844267 | -3.111024 |
| C36 | 8.917911  | 31.054002 | -1.949224 |
| C37 | 9.238482  | 32.349934 | -1.522251 |
| C38 | 8.813712  | 33.473310 | -2.240147 |
| C39 | 8.109388  | 33.263224 | -3.431537 |
| C40 | 7.794417  | 31.971993 | -3.856499 |
| H41 | 7.226256  | 31.839580 | -4.771635 |
| H42 | 7.786065  | 34.112582 | -4.021072 |
| H43 | 9.791704  | 32.476677 | -0.597240 |
| H44 | 9.236614  | 30.209515 | -1.350490 |
| C45 | 9.001687  | 34.866587 | -1.643336 |
| C46 | 10.143548 | 35.709290 | -2.243549 |
| O47 | 11.117094 | 35.947689 | -1.452916 |
| O48 | 10.064808 | 36.187311 | -3.399155 |
| H49 | 9.274301  | 34.727070 | -0.597035 |
| C50 | 7.690894  | 35.677166 | -1.687658 |
| H51 | 7.402733  | 35.885712 | -2.721510 |
| H52 | 7.806924  | 36.623467 | -1.149760 |
| H53 | 6.889157  | 35.105521 | -1.216815 |
| C54 | 7.767920  | 29.448573 | -3.557835 |
| C55 | 6.264007  | 29.278323 | -3.869601 |
| C56 | 5.419532  | 29.456006 | -2.602330 |
| C57 | 6.001038  | 27.901109 | -4.497550 |
| H58 | 6.227996  | 27.107582 | -3.780513 |
| H59 | 6.608866  | 27.750344 | -5.397071 |
| H60 | 4.946499  | 27.802426 | -4.773644 |
| H61 | 4.356418  | 29.335039 | -2.833878 |
| H62 | 5.573947  | 30.444092 | -2.155662 |
| H63 | 5.680054  | 28.683228 | -1.873859 |
| H64 | 5.977346  | 30.049974 | -4.594570 |
| H65 | 8.050970  | 28.720421 | -2.789908 |
| H66 | 8.334713  | 29.184015 | -4.460052 |
| H67 | 7.613779  | 20.736104 | -2.504829 |
| H68 | 6.430692  | 23.911080 | -6.457804 |
| H69 | 3.750880  | 23.700055 | -6.055562 |
| H70 | 0.553721  | 23.917847 | -1.925462 |
| H71 | 0.937858  | 24.318180 | 0.838870  |



|     |           |           |           |
|-----|-----------|-----------|-----------|
| H72 | 4.949897  | 25.071661 | 3.842329  |
| H73 | 7.534960  | 25.444107 | 3.665165  |
| H74 | 10.811491 | 25.596480 | -0.668955 |
| H75 | 10.532530 | 25.009565 | -3.338588 |

Ibuprofen 3-4 Reactant Complex Quartet

|     |           |           |           |
|-----|-----------|-----------|-----------|
| C1  | 6.634541  | 21.134545 | -2.169488 |
| S2  | 6.555035  | 22.272061 | -0.716451 |
| H3  | 6.010134  | 20.266805 | -1.911822 |
| H4  | 6.186648  | 21.641591 | -3.033146 |
| O5  | 5.445918  | 26.322949 | -1.557608 |
| Fe6 | 5.691792  | 24.760588 | -1.303676 |
| N7  | 5.476894  | 24.197052 | -3.246241 |
| N8  | 3.717277  | 24.347294 | -0.988935 |
| N9  | 5.982694  | 24.909452 | 0.715843  |
| N10 | 7.701291  | 24.827881 | -1.564090 |
| C11 | 6.440297  | 24.201430 | -4.208832 |
| C12 | 5.868063  | 23.950728 | -5.508376 |
| C13 | 4.530325  | 23.829646 | -5.310780 |
| C14 | 4.298100  | 23.982719 | -3.896558 |
| C15 | 2.772613  | 24.124777 | -1.936048 |
| C16 | 1.453758  | 24.084335 | -1.340721 |
| C17 | 1.621159  | 24.288088 | -0.009672 |
| C18 | 3.045614  | 24.455491 | 0.184756  |
| C19 | 4.998974  | 24.886780 | 1.650097  |
| C20 | 5.541570  | 25.127972 | 2.951961  |
| C21 | 6.878741  | 25.299584 | 2.810193  |
| C22 | 7.143428  | 25.175086 | 1.389849  |
| C23 | 8.620062  | 25.177803 | -0.618716 |
| C24 | 9.918338  | 25.306063 | -1.221252 |
| C25 | 9.775857  | 25.030125 | -2.542779 |
| C26 | 8.380312  | 24.748345 | -2.751908 |
| C27 | 7.799445  | 24.468185 | -3.992718 |
| H28 | 8.436865  | 24.496588 | -4.868866 |
| C29 | 3.026482  | 23.938299 | -3.303931 |
| H30 | 2.183220  | 23.740574 | -3.953351 |
| C31 | 3.634338  | 24.682588 | 1.431606  |
| H32 | 2.992576  | 24.751843 | 2.300449  |
| C33 | 8.376625  | 25.359351 | 0.746791  |
| H34 | 9.223574  | 25.695882 | 1.330609  |
| C35 | 8.168534  | 30.822048 | -3.105610 |
| C36 | 8.935122  | 31.032189 | -1.956004 |
| C37 | 9.250504  | 32.325536 | -1.525955 |
| C38 | 8.803949  | 33.448523 | -2.229390 |
| C39 | 8.080139  | 33.238196 | -3.408044 |
| C40 | 7.770784  | 31.951951 | -3.835548 |
| H41 | 7.176955  | 31.823492 | -4.740933 |
| H42 | 7.731172  | 34.092939 | -3.987220 |
| H43 | 9.819037  | 32.453481 | -0.602553 |
| H44 | 9.267465  | 30.179262 | -1.365265 |
| C45 | 8.989369  | 34.846362 | -1.637091 |
| C46 | 10.147435 | 35.708005 | -2.252885 |
| O47 | 11.088170 | 35.930023 | -1.463785 |
| O48 | 10.047153 | 36.168561 | -3.382220 |
| H49 | 9.276137  | 34.713449 | -0.590610 |
| C50 | 7.678359  | 35.656078 | -1.673415 |
| H51 | 7.365266  | 35.835463 | -2.706174 |
| H52 | 7.803873  | 36.620082 | -1.166020 |
| H53 | 6.891407  | 35.094842 | -1.166804 |

|     |           |           |           |
|-----|-----------|-----------|-----------|
| C54 | 7.760336  | 29.422561 | -3.549081 |
| C55 | 6.254890  | 29.281359 | -3.869212 |
| C56 | 5.422036  | 29.474918 | -2.594768 |
| C57 | 5.941705  | 27.931910 | -4.533859 |
| H58 | 6.141817  | 27.101768 | -3.848943 |
| H59 | 6.535070  | 27.792186 | -5.447662 |
| H60 | 4.881928  | 27.884567 | -4.808112 |
| H61 | 4.352224  | 29.406480 | -2.819268 |
| H62 | 5.625455  | 30.452134 | -2.139517 |
| H63 | 5.649591  | 28.683527 | -1.874843 |
| H64 | 5.988102  | 30.071651 | -4.583355 |
| H65 | 8.024329  | 28.699927 | -2.766161 |
| H66 | 8.339286  | 29.142562 | -4.440610 |
| H67 | 7.615442  | 20.719732 | -2.503887 |
| H68 | 6.424538  | 23.909999 | -6.454849 |
| H69 | 3.742545  | 23.700256 | -6.053593 |
| H70 | 0.539447  | 23.922849 | -1.914912 |
| H71 | 0.924768  | 24.324453 | 0.847781  |
| H72 | 4.944414  | 25.100758 | 3.859829  |
| H73 | 7.533027  | 25.456208 | 3.679164  |
| H74 | 10.808762 | 25.584847 | -0.655744 |
| H75 | 10.533037 | 25.003376 | -3.326286 |

Ibuprofen 3-4 Transition State Doublet

|     |          |           |           |
|-----|----------|-----------|-----------|
| C1  | 6.644589 | 21.204771 | -2.226334 |
| S2  | 6.551225 | 22.345354 | -0.791267 |
| H3  | 6.006292 | 20.355099 | -1.966310 |
| H4  | 6.223835 | 21.700259 | -3.102920 |
| O5  | 5.540723 | 26.416888 | -1.618716 |
| Fe6 | 5.758184 | 24.709241 | -1.391797 |
| N7  | 5.527547 | 24.246284 | -3.329156 |
| N8  | 3.775943 | 24.373177 | -1.080745 |
| N9  | 6.021180 | 24.935268 | 0.617345  |
| N10 | 7.735723 | 24.855405 | -1.661681 |
| C11 | 6.496335 | 24.223141 | -4.297558 |
| C12 | 5.916004 | 23.967630 | -5.594877 |
| C13 | 4.572574 | 23.858401 | -5.395819 |
| C14 | 4.339599 | 24.026412 | -3.980469 |
| C15 | 2.821066 | 24.150327 | -2.031264 |
| C16 | 1.501660 | 24.093228 | -1.430372 |
| C17 | 1.672310 | 24.287927 | -0.091993 |
| C18 | 3.097251 | 24.461007 | 0.101542  |
| C19 | 5.040437 | 24.873600 | 1.558790  |
| C20 | 5.582662 | 25.083946 | 2.869495  |
| C21 | 6.920530 | 25.284798 | 2.728619  |
| C22 | 7.185173 | 25.199790 | 1.296885  |
| C23 | 8.648456 | 25.227788 | -0.708360 |
| C24 | 9.951056 | 25.371408 | -1.310821 |
| C25 | 9.813501 | 25.078539 | -2.636061 |
| C26 | 8.421191 | 24.774050 | -2.849476 |
| C27 | 7.841797 | 24.481310 | -4.074563 |
| H28 | 8.479300 | 24.504699 | -4.948701 |
| C29 | 3.085015 | 23.980904 | -3.386189 |
| H30 | 2.243130 | 23.783070 | -4.036110 |
| C31 | 3.689223 | 24.666581 | 1.333346  |
| H32 | 3.052324 | 24.714577 | 2.204496  |
| C33 | 8.397688 | 25.402707 | 0.645343  |
| H34 | 9.239374 | 25.751059 | 1.225663  |
| C35 | 8.210408 | 30.693388 | -2.909201 |

|     |           |           |           |
|-----|-----------|-----------|-----------|
| C36 | 8.996319  | 31.016346 | -1.797281 |
| C37 | 9.291671  | 32.344811 | -1.475679 |
| C38 | 8.808457  | 33.405603 | -2.250311 |
| C39 | 8.070963  | 33.085062 | -3.398842 |
| C40 | 7.781869  | 31.754778 | -3.720657 |
| H41 | 7.177613  | 31.544867 | -4.598400 |
| H42 | 7.684793  | 33.877191 | -4.029127 |
| H43 | 9.864403  | 32.552160 | -0.575991 |
| H44 | 9.354606  | 30.226906 | -1.145546 |
| C45 | 8.951416  | 34.840073 | -1.727226 |
| C46 | 10.123756 | 35.679729 | -2.282890 |
| O47 | 11.077590 | 35.905718 | -1.460322 |
| O48 | 10.079743 | 36.175389 | -3.431016 |
| H49 | 9.157099  | 34.752906 | -0.659303 |
| C50 | 7.643003  | 35.635319 | -1.893364 |
| H51 | 7.447538  | 35.832838 | -2.949171 |
| H52 | 7.706425  | 36.588627 | -1.357197 |
| H53 | 6.807123  | 35.064227 | -1.485585 |
| C54 | 7.839523  | 29.244169 | -3.199816 |
| C55 | 6.356132  | 28.986888 | -3.556910 |
| C56 | 5.397820  | 29.526142 | -2.487211 |
| C57 | 6.099935  | 27.498156 | -3.788932 |
| H58 | 5.891962  | 26.913546 | -2.674596 |
| H59 | 6.929986  | 26.971889 | -4.263227 |
| H60 | 5.165584  | 27.310250 | -4.324300 |
| H61 | 4.361378  | 29.359140 | -2.794380 |
| H62 | 5.551630  | 30.593424 | -2.306758 |
| H63 | 5.548217  | 28.971975 | -1.556585 |
| H64 | 6.147092  | 29.519368 | -4.497234 |
| H65 | 8.101004  | 28.630282 | -2.330615 |
| H66 | 8.448979  | 28.870092 | -4.032570 |
| H67 | 7.621156  | 20.765992 | -2.535795 |
| H68 | 6.470109  | 23.913987 | -6.531420 |
| H69 | 3.783342  | 23.719717 | -6.128557 |
| H70 | 0.591817  | 23.923136 | -2.000551 |
| H71 | 0.983044  | 24.314826 | 0.767679  |
| H72 | 4.984693  | 25.001566 | 3.770163  |
| H73 | 7.565321  | 25.426093 | 3.598127  |
| H74 | 10.835945 | 25.655899 | -0.747905 |
| H75 | 10.561389 | 25.034321 | -3.413935 |

Ibuprofen 3-4 Transition State Quartet

|     |          |           |           |
|-----|----------|-----------|-----------|
| C1  | 6.644795 | 21.209832 | -2.239247 |
| S2  | 6.589988 | 22.375944 | -0.809461 |
| H3  | 5.996768 | 20.365600 | -1.967274 |
| H4  | 6.222979 | 21.703843 | -3.124163 |
| O5  | 5.449795 | 26.452148 | -1.627345 |
| Fe6 | 5.740279 | 24.716195 | -1.367702 |
| N7  | 5.511067 | 24.250076 | -3.340788 |
| N8  | 3.746225 | 24.372225 | -1.065365 |
| N9  | 6.001082 | 24.955145 | 0.634278  |
| N10 | 7.726327 | 24.900312 | -1.659264 |
| C11 | 6.473399 | 24.224374 | -4.298973 |
| C12 | 5.900260 | 23.969446 | -5.596998 |
| C13 | 4.560508 | 23.866808 | -5.398766 |
| C14 | 4.332637 | 24.037683 | -3.985031 |
| C15 | 2.803034 | 24.158526 | -2.018538 |
| C16 | 1.482244 | 24.100757 | -1.423373 |
| C17 | 1.648075 | 24.290044 | -0.090325 |

|     |           |           |           |
|-----|-----------|-----------|-----------|
| C18 | 3.072638  | 24.461190 | 0.104070  |
| C19 | 5.026495  | 24.886555 | 1.572571  |
| C20 | 5.571835  | 25.094101 | 2.880278  |
| C21 | 6.902909  | 25.298111 | 2.735697  |
| C22 | 7.161352  | 25.221844 | 1.305108  |
| C23 | 8.634634  | 25.264842 | -0.715608 |
| C24 | 9.937729  | 25.390121 | -1.314511 |
| C25 | 9.800609  | 25.089652 | -2.631321 |
| C26 | 8.408759  | 24.797570 | -2.840771 |
| C27 | 7.835406  | 24.487664 | -4.080097 |
| H28 | 8.477838  | 24.503493 | -4.952900 |
| C29 | 3.059941  | 23.992669 | -3.387769 |
| H30 | 2.216087  | 23.800631 | -4.040755 |
| C31 | 3.662677  | 24.673614 | 1.354884  |
| H32 | 3.023555  | 24.721937 | 2.226855  |
| C33 | 8.387634  | 25.439770 | 0.655648  |
| H34 | 9.230285  | 25.788532 | 1.237865  |
| C35 | 8.202776  | 30.667071 | -2.933762 |
| C36 | 8.986892  | 30.984595 | -1.821053 |
| C37 | 9.279517  | 32.311626 | -1.496592 |
| C38 | 8.793990  | 33.371550 | -2.268967 |
| C39 | 8.057868  | 33.054592 | -3.417599 |
| C40 | 7.771621  | 31.727576 | -3.743294 |
| H41 | 7.163779  | 31.514845 | -4.624264 |
| H42 | 7.667775  | 33.854481 | -4.047233 |
| H43 | 9.852206  | 32.520774 | -0.589845 |
| H44 | 9.345723  | 30.188213 | -1.168605 |
| C45 | 8.926713  | 34.808421 | -1.739218 |
| C46 | 10.113481 | 35.677858 | -2.299183 |
| O47 | 11.029356 | 35.893623 | -1.474796 |
| O48 | 10.053752 | 36.156570 | -3.423471 |
| H49 | 9.140297  | 34.719242 | -0.672296 |
| C50 | 7.611728  | 35.595827 | -1.899125 |
| H51 | 7.415158  | 35.801117 | -2.953570 |
| H52 | 7.663479  | 36.545671 | -1.353843 |
| H53 | 6.781303  | 35.011018 | -1.496795 |
| C54 | 7.820550  | 29.218123 | -3.227792 |
| C55 | 6.330727  | 28.983269 | -3.579600 |
| C56 | 5.384180  | 29.523540 | -2.493367 |
| C57 | 6.071753  | 27.514591 | -3.851835 |
| H58 | 5.806040  | 26.882393 | -2.600730 |
| H59 | 6.911140  | 26.938157 | -4.239419 |
| H60 | 5.125839  | 27.284612 | -4.343880 |
| H61 | 4.341390  | 29.368196 | -2.784710 |
| H62 | 5.552215  | 30.592115 | -2.318788 |
| H63 | 5.540290  | 28.972601 | -1.562518 |
| H64 | 6.116124  | 29.534337 | -4.510285 |
| H65 | 8.077392  | 28.598477 | -2.362486 |
| H66 | 8.422146  | 28.838998 | -4.066372 |
| H67 | 7.620589  | 20.762882 | -2.549069 |
| H68 | 6.456314  | 23.909915 | -6.539151 |
| H69 | 3.771700  | 23.724020 | -6.138893 |
| H70 | 0.568721  | 23.929668 | -1.996493 |
| H71 | 0.955555  | 24.313069 | 0.770362  |
| H72 | 4.976420  | 25.006706 | 3.786637  |
| H73 | 7.555534  | 25.433867 | 3.605831  |
| H74 | 10.829881 | 25.665098 | -0.751075 |
| H75 | 10.554884 | 25.036238 | -3.411825 |

Ibuprofen 3-5 Reactant Complex Doublet

|     |           |           |           |
|-----|-----------|-----------|-----------|
| C1  | 6.657511  | 21.212061 | -1.983737 |
| S2  | 6.465002  | 22.322531 | -0.553423 |
| H3  | 6.039696  | 20.337964 | -1.760531 |
| H4  | 6.265202  | 21.695967 | -2.880096 |
| O5  | 5.677428  | 26.318263 | -1.398457 |
| Fe6 | 5.857967  | 24.701876 | -1.206948 |
| N7  | 5.624522  | 24.238894 | -3.157958 |
| N8  | 3.873175  | 24.382199 | -0.914280 |
| N9  | 6.142718  | 24.848493 | 0.789039  |
| N10 | 7.860665  | 24.760644 | -1.485709 |
| C11 | 6.589759  | 24.242924 | -4.129427 |
| C12 | 6.008747  | 24.026100 | -5.433142 |
| C13 | 4.664621  | 23.917254 | -5.234727 |
| C14 | 4.437739  | 24.052654 | -3.816569 |
| C15 | 2.920898  | 24.179193 | -1.870872 |
| C16 | 1.600298  | 24.136867 | -1.276442 |
| C17 | 1.770094  | 24.314646 | 0.065088  |
| C18 | 3.198534  | 24.472233 | 0.267190  |
| C19 | 5.151711  | 24.876997 | 1.724672  |
| C20 | 5.708043  | 25.105384 | 3.028869  |
| C21 | 7.059209  | 25.175740 | 2.888013  |
| C22 | 7.323026  | 25.047560 | 1.463671  |
| C23 | 8.792100  | 25.069576 | -0.532895 |
| C24 | 10.096544 | 25.194326 | -1.139947 |
| C25 | 9.946162  | 24.943307 | -2.473799 |
| C26 | 8.537921  | 24.694958 | -2.679671 |
| C27 | 7.942629  | 24.467094 | -3.908346 |
| H28 | 8.576404  | 24.499347 | -4.783728 |
| C29 | 3.181726  | 24.017131 | -3.226255 |
| H30 | 2.340799  | 23.836875 | -3.882988 |
| C31 | 3.795307  | 24.691945 | 1.498146  |
| H32 | 3.154796  | 24.772213 | 2.364982  |
| C33 | 8.547159  | 25.210081 | 0.825355  |
| H34 | 9.399210  | 25.505297 | 1.419550  |
| C35 | 8.202416  | 31.006099 | -2.450088 |
| C36 | 9.160061  | 31.186109 | -1.446281 |
| C37 | 9.650528  | 32.456568 | -1.125789 |
| C38 | 9.178983  | 33.592770 | -1.792874 |
| C39 | 8.206123  | 33.421224 | -2.781150 |
| C40 | 7.729961  | 32.151231 | -3.105908 |
| H41 | 6.976660  | 32.062435 | -3.879024 |
| H42 | 7.825645  | 34.290537 | -3.305146 |
| H43 | 10.393875 | 32.562582 | -0.340453 |
| H44 | 9.527724  | 30.324874 | -0.896213 |
| C45 | 9.696412  | 34.984143 | -1.439723 |
| C46 | 10.362784 | 35.626517 | -2.667710 |
| O47 | 11.636575 | 35.637740 | -2.700771 |
| O48 | 9.637817  | 36.094641 | -3.569193 |
| H49 | 10.464311 | 34.874079 | -0.669714 |
| C50 | 8.565372  | 35.888077 | -0.912176 |
| H51 | 7.821518  | 36.038060 | -1.695386 |
| H52 | 8.952155  | 36.868981 | -0.615082 |
| H53 | 8.076114  | 35.426380 | -0.050275 |
| C54 | 7.748151  | 29.601429 | -2.828265 |
| C55 | 6.353772  | 29.483067 | -3.467071 |
| C56 | 5.273401  | 29.820348 | -2.432228 |
| C57 | 6.150555  | 28.074683 | -4.048838 |
| H58 | 5.144834  | 27.976725 | -4.470742 |
| H59 | 6.259889  | 27.316825 | -3.268742 |

|     |           |           |           |
|-----|-----------|-----------|-----------|
| H60 | 6.876635  | 27.871870 | -4.843270 |
| H61 | 5.422781  | 30.822353 | -2.016950 |
| H62 | 5.315502  | 29.091782 | -1.614917 |
| H63 | 4.273618  | 29.770018 | -2.875301 |
| H64 | 6.285051  | 30.194334 | -4.297883 |
| H65 | 7.775485  | 28.963449 | -1.937197 |
| H66 | 8.480649  | 29.170838 | -3.521834 |
| H67 | 7.649093  | 20.799836 | -2.239810 |
| H68 | 6.569705  | 23.961150 | -6.365722 |
| H69 | 3.867610  | 23.789173 | -5.961118 |
| H70 | 0.691092  | 24.013901 | -1.862438 |
| H71 | 1.066259  | 24.340388 | 0.910456  |
| H72 | 5.114730  | 25.179732 | 3.930443  |
| H73 | 7.720690  | 25.251457 | 3.749388  |
| H74 | 10.981724 | 25.471955 | -0.577016 |
| H75 | 10.700638 | 24.918921 | -3.261547 |

Ibuprofen 3-5 Reactant Complex Quartet

|     |           |           |           |
|-----|-----------|-----------|-----------|
| C1  | 6.659880  | 21.216427 | -1.979074 |
| S2  | 6.488450  | 22.337390 | -0.544777 |
| H3  | 6.035781  | 20.340698 | -1.752941 |
| H4  | 6.264405  | 21.702463 | -2.880576 |
| O5  | 5.631218  | 26.338516 | -1.376967 |
| Fe6 | 5.842846  | 24.755003 | -1.189322 |
| N7  | 5.610929  | 24.257839 | -3.154230 |
| N8  | 3.849110  | 24.398950 | -0.891593 |
| N9  | 6.132527  | 24.879329 | 0.818863  |
| N10 | 7.857963  | 24.787553 | -1.470827 |
| C11 | 6.570340  | 24.250809 | -4.117319 |
| C12 | 5.992171  | 24.030180 | -5.418620 |
| C13 | 4.655624  | 23.930848 | -5.222018 |
| C14 | 4.429073  | 24.073650 | -3.806620 |
| C15 | 2.906277  | 24.197729 | -1.842683 |
| C16 | 1.587628  | 24.150606 | -1.252388 |
| C17 | 1.754643  | 24.326250 | 0.083370  |
| C18 | 3.181241  | 24.487506 | 0.283130  |
| C19 | 5.148158  | 24.897210 | 1.751014  |
| C20 | 5.707683  | 25.110498 | 3.053527  |
| C21 | 7.051739  | 25.183669 | 2.908748  |
| C22 | 7.308386  | 25.071631 | 1.486814  |
| C23 | 8.786131  | 25.096641 | -0.525264 |
| C24 | 10.087175 | 25.211076 | -1.132787 |
| C25 | 9.936896  | 24.951944 | -2.456576 |
| C26 | 8.531784  | 24.707738 | -2.659178 |
| C27 | 7.939622  | 24.469071 | -3.903124 |
| H28 | 8.576833  | 24.492762 | -4.779073 |
| C29 | 3.159011  | 24.034250 | -3.215835 |
| H30 | 2.314618  | 23.852634 | -3.871023 |
| C31 | 3.777981  | 24.708625 | 1.530670  |
| H32 | 3.134867  | 24.786167 | 2.399527  |
| C33 | 8.546868  | 25.242238 | 0.847164  |
| H34 | 9.400169  | 25.542133 | 1.442535  |
| C35 | 8.222886  | 30.886041 | -2.452256 |
| C36 | 9.167100  | 31.083799 | -1.439275 |
| C37 | 9.644743  | 32.359074 | -1.126012 |
| C38 | 9.174363  | 33.485768 | -1.811187 |
| C39 | 8.215087  | 33.296903 | -2.808302 |
| C40 | 7.750382  | 32.021551 | -3.125055 |
| H41 | 7.001829  | 31.917559 | -3.908218 |

|     |           |           |           |
|-----|-----------|-----------|-----------|
| H42 | 7.836006  | 34.163892 | -3.350235 |
| H43 | 10.381802 | 32.479642 | -0.329114 |
| H44 | 9.534272  | 30.225721 | -0.874741 |
| C45 | 9.672792  | 34.888544 | -1.454658 |
| C46 | 10.365606 | 35.559265 | -2.690467 |
| O47 | 11.608566 | 35.553747 | -2.694924 |
| O48 | 9.648662  | 36.031974 | -3.559018 |
| H49 | 10.437910 | 34.786203 | -0.678526 |
| C50 | 8.526257  | 35.778804 | -0.937991 |
| H51 | 7.793751  | 35.926855 | -1.732670 |
| H52 | 8.897098  | 36.762643 | -0.626628 |
| H53 | 8.027343  | 35.305023 | -0.087234 |
| C54 | 7.784824  | 29.467602 | -2.821540 |
| C55 | 6.437285  | 29.328622 | -3.553225 |
| C56 | 5.285094  | 29.632143 | -2.583758 |
| C57 | 6.302279  | 27.924382 | -4.164022 |
| H58 | 5.321207  | 27.798613 | -4.636122 |
| H59 | 6.400797  | 27.159547 | -3.391802 |
| H60 | 7.070950  | 27.749744 | -4.926857 |
| H61 | 5.384726  | 30.634183 | -2.151365 |
| H62 | 5.294368  | 28.892850 | -1.774413 |
| H63 | 4.313725  | 29.565809 | -3.088554 |
| H64 | 6.406789  | 30.047908 | -4.381739 |
| H65 | 7.742582  | 28.855482 | -1.910864 |
| H66 | 8.566759  | 29.012892 | -3.443872 |
| H67 | 7.651714  | 20.799773 | -2.241697 |
| H68 | 6.556684  | 23.960016 | -6.355398 |
| H69 | 3.858480  | 23.802718 | -5.955714 |
| H70 | 0.675592  | 24.023389 | -1.840883 |
| H71 | 1.045181  | 24.346418 | 0.929953  |
| H72 | 5.117226  | 25.174871 | 3.963135  |
| H73 | 7.720930  | 25.251540 | 3.770985  |
| H74 | 10.980629 | 25.486681 | -0.571039 |
| H75 | 10.695375 | 24.923835 | -3.248952 |

Ibuprofen 3-5 Transition State Doublet

|     |          |           |           |
|-----|----------|-----------|-----------|
| C1  | 6.648862 | 21.280615 | -1.980867 |
| S2  | 6.471774 | 22.431749 | -0.570864 |
| H3  | 6.013720 | 20.424753 | -1.737504 |
| H4  | 6.262144 | 21.751851 | -2.886453 |
| O5  | 5.675161 | 26.539876 | -1.340384 |
| Fe6 | 5.867657 | 24.761825 | -1.247904 |
| N7  | 5.623191 | 24.372568 | -3.205924 |
| N8  | 3.870536 | 24.464796 | -0.953224 |
| N9  | 6.130145 | 24.965099 | 0.751768  |
| N10 | 7.852922 | 24.859477 | -1.539208 |
| C11 | 6.590336 | 24.325078 | -4.176796 |
| C12 | 6.007988 | 24.060809 | -5.471879 |
| C13 | 4.664918 | 23.958283 | -5.269100 |
| C14 | 4.437634 | 24.144836 | -3.855835 |
| C15 | 2.917968 | 24.244182 | -1.906408 |
| C16 | 1.599195 | 24.168215 | -1.307253 |
| C17 | 1.770536 | 24.343535 | 0.035662  |
| C18 | 3.195936 | 24.531112 | 0.230308  |
| C19 | 5.144392 | 24.972345 | 1.687347  |
| C20 | 5.698073 | 25.182063 | 2.997382  |
| C21 | 7.049302 | 25.250827 | 2.857848  |
| C22 | 7.309844 | 25.145060 | 1.427741  |
| C23 | 8.781184 | 25.146236 | -0.576332 |

|     |           |           |           |
|-----|-----------|-----------|-----------|
| C24 | 10.093685 | 25.231241 | -1.169775 |
| C25 | 9.951851  | 24.976203 | -2.504334 |
| C26 | 8.540597  | 24.763436 | -2.724468 |
| C27 | 7.947080  | 24.526463 | -3.955020 |
| H28 | 8.588035  | 24.513979 | -4.826017 |
| C29 | 3.182112  | 24.087891 | -3.262212 |
| H30 | 2.344455  | 23.877708 | -3.915208 |
| C31 | 3.792260  | 24.758070 | 1.460704  |
| H32 | 3.151885  | 24.817823 | 2.329562  |
| C33 | 8.534041  | 25.290334 | 0.784182  |
| H34 | 9.392976  | 25.562336 | 1.380246  |
| C35 | 8.189494  | 30.945470 | -2.345466 |
| C36 | 9.173060  | 31.175635 | -1.377444 |
| C37 | 9.652021  | 32.462373 | -1.113446 |
| C38 | 9.148800  | 33.571122 | -1.801762 |
| C39 | 8.160881  | 33.350942 | -2.769444 |
| C40 | 7.692944  | 32.059640 | -3.037789 |
| H41 | 6.921164  | 31.928149 | -3.788640 |
| H42 | 7.756437  | 34.196263 | -3.314860 |
| H43 | 10.410803 | 32.604039 | -0.349185 |
| H44 | 9.564585  | 30.340135 | -0.807978 |
| C45 | 9.655917  | 34.973965 | -1.468901 |
| C46 | 10.339096 | 35.615752 | -2.687608 |
| O47 | 11.612680 | 35.615687 | -2.710737 |
| O48 | 9.621414  | 36.102193 | -3.584873 |
| H49 | 10.416669 | 34.872457 | -0.690264 |
| C50 | 8.527370  | 35.890507 | -0.958016 |
| H51 | 7.794425  | 36.048260 | -1.750004 |
| H52 | 8.924863  | 36.868045 | -0.663971 |
| H53 | 8.024505  | 35.442636 | -0.096951 |
| C54 | 7.743549  | 29.512190 | -2.624078 |
| C55 | 6.312577  | 29.315061 | -3.156919 |
| C56 | 5.265530  | 29.879166 | -2.185554 |
| C57 | 6.042933  | 27.861266 | -3.498152 |
| H58 | 5.059666  | 27.670967 | -3.927471 |
| H59 | 5.912743  | 27.061179 | -2.306587 |
| H60 | 6.847616  | 27.330249 | -4.008102 |
| H61 | 5.469130  | 30.925116 | -1.947580 |
| H62 | 5.285469  | 29.294651 | -1.259968 |
| H63 | 4.258761  | 29.804030 | -2.608067 |
| H64 | 6.228699  | 29.874254 | -4.105053 |
| H65 | 7.849286  | 28.925922 | -1.705124 |
| H66 | 8.435872  | 29.060835 | -3.344842 |
| H67 | 7.634834  | 20.840697 | -2.237156 |
| H68 | 6.568226  | 23.970901 | -6.400622 |
| H69 | 3.864998  | 23.803184 | -5.985953 |
| H70 | 0.687982  | 24.021367 | -1.881953 |
| H71 | 1.069446  | 24.354915 | 0.884906  |
| H72 | 5.103101  | 25.229618 | 3.898978  |
| H73 | 7.705033  | 25.301318 | 3.723417  |
| H74 | 10.977169 | 25.488806 | -0.594144 |
| H75 | 10.711331 | 24.934119 | -3.283724 |

Ibuprofen 3-5 Transition State Quartet

|    |          |           |           |
|----|----------|-----------|-----------|
| C1 | 6.666957 | 21.298947 | -2.003601 |
| S2 | 6.500517 | 22.431585 | -0.570875 |
| H3 | 6.014930 | 20.442733 | -1.788982 |
| H4 | 6.301381 | 21.796677 | -2.910916 |
| O5 | 5.607843 | 26.519459 | -1.446045 |



|     |           |           |           |
|-----|-----------|-----------|-----------|
| Fe6 | 5.856243  | 24.763082 | -1.218645 |
| N7  | 5.616095  | 24.334746 | -3.200117 |
| N8  | 3.848068  | 24.456331 | -0.922641 |
| N9  | 6.118259  | 24.982649 | 0.777119  |
| N10 | 7.855096  | 24.875519 | -1.518802 |
| C11 | 6.573166  | 24.307406 | -4.161956 |
| C12 | 5.993562  | 24.069075 | -5.459731 |
| C13 | 4.655812  | 23.968788 | -5.257102 |
| C14 | 4.436423  | 24.132874 | -3.842496 |
| C15 | 2.907370  | 24.240835 | -1.876177 |
| C16 | 1.587689  | 24.171709 | -1.283580 |
| C17 | 1.753135  | 24.346726 | 0.052354  |
| C18 | 3.178189  | 24.531080 | 0.247194  |
| C19 | 5.137010  | 24.982954 | 1.712464  |
| C20 | 5.694948  | 25.186272 | 3.019101  |
| C21 | 7.038537  | 25.258389 | 2.875781  |
| C22 | 7.295091  | 25.162158 | 1.448464  |
| C23 | 8.776744  | 25.173209 | -0.568083 |
| C24 | 10.086300 | 25.260404 | -1.162665 |
| C25 | 9.943435  | 24.997312 | -2.488697 |
| C26 | 8.535426  | 24.772857 | -2.701590 |
| C27 | 7.946875  | 24.519427 | -3.944680 |
| H28 | 8.588874  | 24.516019 | -4.818202 |
| C29 | 3.163898  | 24.080490 | -3.246465 |
| H30 | 2.322119  | 23.880110 | -3.900416 |
| C31 | 3.772020  | 24.769580 | 1.496243  |
| H32 | 3.129578  | 24.839294 | 2.364627  |
| C33 | 8.533139  | 25.323406 | 0.807061  |
| H34 | 9.390333  | 25.607668 | 1.405168  |
| C35 | 8.217983  | 30.786702 | -2.320952 |
| C36 | 9.187939  | 31.031440 | -1.345454 |
| C37 | 9.653934  | 32.322700 | -1.085780 |
| C38 | 9.150378  | 33.421855 | -1.791357 |
| C39 | 8.170287  | 33.184636 | -2.760090 |
| C40 | 7.715147  | 31.890823 | -3.021722 |
| H41 | 6.943263  | 31.744069 | -3.778058 |
| H42 | 7.759441  | 34.029279 | -3.316307 |
| H43 | 10.404739 | 32.478468 | -0.307839 |
| H44 | 9.581109  | 30.197439 | -0.765204 |
| C45 | 9.633644  | 34.839555 | -1.462392 |
| C46 | 10.331247 | 35.520231 | -2.692642 |
| O47 | 11.574032 | 35.520914 | -2.688498 |
| O48 | 9.618426  | 36.007292 | -3.558080 |
| H49 | 10.396581 | 34.752946 | -0.681772 |
| C50 | 8.481770  | 35.727940 | -0.955087 |
| H51 | 7.747135  | 35.861941 | -1.750753 |
| H52 | 8.847155  | 36.718175 | -0.658692 |
| H53 | 7.987662  | 35.264552 | -0.095940 |
| C54 | 7.786086  | 29.344732 | -2.605229 |
| C55 | 6.397487  | 29.147278 | -3.242265 |
| C56 | 5.285139  | 29.672416 | -2.318218 |
| C57 | 6.175080  | 27.694336 | -3.616082 |
| H58 | 5.246784  | 27.487528 | -4.151791 |
| H59 | 5.916236  | 26.988907 | -2.412010 |
| H60 | 7.036009  | 27.163021 | -4.023076 |
| H61 | 5.439519  | 30.727788 | -2.069778 |
| H62 | 5.285459  | 29.087572 | -1.393610 |
| H63 | 4.299816  | 29.562066 | -2.784741 |
| H64 | 6.366544  | 29.720989 | -4.185268 |
| H65 | 7.815009  | 28.770586 | -1.673191 |

|     |           |           |           |
|-----|-----------|-----------|-----------|
| H66 | 8.532695  | 28.877857 | -3.262073 |
| H67 | 7.651802  | 20.850869 | -2.254824 |
| H68 | 6.554054  | 23.981139 | -6.393633 |
| H69 | 3.854802  | 23.819460 | -5.981415 |
| H70 | 0.674093  | 24.025883 | -1.864198 |
| H71 | 1.047601  | 24.354433 | 0.902504  |
| H72 | 5.101669  | 25.228153 | 3.928078  |
| H73 | 7.702621  | 25.304723 | 3.743256  |
| H74 | 10.978048 | 25.511266 | -0.587487 |
| H75 | 10.706173 | 24.950999 | -3.272460 |

Ibuprofen 3-6 Reactant Complex Doublet

|     |           |           |           |
|-----|-----------|-----------|-----------|
| C1  | 6.354567  | 21.241307 | -2.399460 |
| S2  | 6.199995  | 22.198079 | -0.835301 |
| H3  | 5.714326  | 20.364148 | -2.274488 |
| H4  | 5.974589  | 21.823609 | -3.237987 |
| O5  | 5.488704  | 26.283790 | -1.334237 |
| Fe6 | 5.672861  | 24.659148 | -1.193535 |
| N7  | 5.443468  | 24.265906 | -3.156581 |
| N8  | 3.699975  | 24.308729 | -0.898270 |
| N9  | 5.963423  | 24.744036 | 0.823873  |
| N10 | 7.667485  | 24.754598 | -1.452898 |
| C11 | 6.415650  | 24.276433 | -4.121851 |
| C12 | 5.843144  | 24.018154 | -5.423741 |
| C13 | 4.504534  | 23.864809 | -5.226331 |
| C14 | 4.265328  | 24.014128 | -3.809424 |
| C15 | 2.753863  | 24.072394 | -1.850607 |
| C16 | 1.435943  | 23.987459 | -1.251082 |
| C17 | 1.604489  | 24.172302 | 0.089557  |
| C18 | 3.026779  | 24.367540 | 0.286823  |
| C19 | 4.969452  | 24.767066 | 1.754428  |
| C20 | 5.503865  | 25.047390 | 3.058262  |
| C21 | 6.851271  | 25.180002 | 2.924921  |
| C22 | 7.129179  | 25.008260 | 1.505488  |
| C23 | 8.591072  | 25.064608 | -0.493568 |
| C24 | 9.894877  | 25.216694 | -1.090883 |
| C25 | 9.748431  | 24.980282 | -2.423507 |
| C26 | 8.348675  | 24.714851 | -2.644064 |
| C27 | 7.767139  | 24.495501 | -3.883383 |
| H28 | 8.419941  | 24.508118 | -4.747799 |
| C29 | 3.016158  | 23.914408 | -3.208197 |
| H30 | 2.176933  | 23.686615 | -3.854397 |
| C31 | 3.617122  | 24.571284 | 1.522444  |
| H32 | 2.978462  | 24.636844 | 2.393054  |
| C33 | 8.346724  | 25.194460 | 0.866208  |
| H34 | 9.196188  | 25.511497 | 1.452985  |
| C35 | 7.463660  | 31.388282 | -1.985160 |
| C36 | 8.611766  | 31.255210 | -1.190396 |
| C37 | 9.382261  | 32.372666 | -0.840642 |
| C38 | 9.031339  | 33.657017 | -1.274146 |
| C39 | 7.920959  | 33.786303 | -2.113693 |
| C40 | 7.155983  | 32.673211 | -2.463867 |
| H41 | 6.272168  | 32.804895 | -3.079413 |
| H42 | 7.625547  | 34.773268 | -2.450165 |
| H43 | 10.229963 | 32.246069 | -0.175991 |
| H44 | 8.885492  | 30.285736 | -0.792300 |
| C45 | 9.709043  | 34.892816 | -0.691483 |
| C46 | 10.339345 | 35.858421 | -1.736905 |
| O47 | 11.234401 | 35.382484 | -2.489692 |

|     |           |           |           |
|-----|-----------|-----------|-----------|
| O48 | 9.970748  | 37.052807 | -1.684559 |
| H49 | 10.549264 | 34.530209 | -0.083577 |
| C50 | 8.717163  | 35.649926 | 0.221173  |
| H51 | 8.248471  | 34.967669 | 0.930384  |
| H52 | 7.927918  | 36.098832 | -0.382715 |
| H53 | 9.206389  | 36.451882 | 0.783651  |
| C54 | 6.522128  | 30.232997 | -2.274159 |
| C55 | 6.949009  | 29.254066 | -3.400063 |
| C56 | 5.723874  | 28.487149 | -3.925105 |
| C57 | 7.998212  | 28.253865 | -2.895325 |
| H58 | 7.557941  | 27.624747 | -2.114201 |
| H59 | 8.875881  | 28.763492 | -2.490800 |
| H60 | 8.324121  | 27.592787 | -3.705235 |
| H61 | 6.013928  | 27.798649 | -4.726092 |
| H62 | 4.962370  | 29.169579 | -4.317704 |
| H63 | 5.282194  | 27.890055 | -3.121404 |
| H64 | 7.377614  | 29.845565 | -4.220756 |
| H65 | 5.545993  | 30.655203 | -2.536643 |
| H66 | 6.372132  | 29.639821 | -1.364410 |
| H67 | 7.355887  | 20.854049 | -2.691837 |
| H68 | 6.395259  | 23.967446 | -6.366317 |
| H69 | 3.725283  | 23.699196 | -5.966508 |
| H70 | 0.531657  | 23.836264 | -1.836862 |
| H71 | 0.916136  | 24.181510 | 0.947656  |
| H72 | 4.882355  | 25.103781 | 3.946538  |
| H73 | 7.502051  | 25.355452 | 3.786754  |
| H74 | 10.779915 | 25.497668 | -0.525079 |
| H75 | 10.494225 | 24.967075 | -3.204654 |

Ibuprofen 3-6 Reactant Complex Quartet

|     |          |           |           |
|-----|----------|-----------|-----------|
| C1  | 6.350107 | 21.233518 | -2.403355 |
| S2  | 6.207200 | 22.200242 | -0.830921 |
| H3  | 5.706685 | 20.351810 | -2.281006 |
| H4  | 5.967658 | 21.821824 | -3.243962 |
| O5  | 5.512409 | 26.308129 | -1.356106 |
| Fe6 | 5.679508 | 24.711959 | -1.198984 |
| N7  | 5.450007 | 24.272209 | -3.170737 |
| N8  | 3.689412 | 24.342037 | -0.901827 |
| N9  | 5.966938 | 24.770147 | 0.832038  |
| N10 | 7.683457 | 24.744228 | -1.452678 |
| C11 | 6.415701 | 24.276218 | -4.128517 |
| C12 | 5.845280 | 24.018932 | -5.428682 |
| C13 | 4.511944 | 23.869471 | -5.230689 |
| C14 | 4.276985 | 24.024978 | -3.817156 |
| C15 | 2.753172 | 24.100967 | -1.848113 |
| C16 | 1.437196 | 24.006364 | -1.252785 |
| C17 | 1.603605 | 24.189026 | 0.082650  |
| C18 | 3.022938 | 24.392357 | 0.274866  |
| C19 | 4.978229 | 24.784183 | 1.755341  |
| C20 | 5.508658 | 25.047924 | 3.060530  |
| C21 | 6.852512 | 25.180844 | 2.928752  |
| C22 | 7.127545 | 25.018029 | 1.511414  |
| C23 | 8.601728 | 25.050859 | -0.498289 |
| C24 | 9.902461 | 25.201830 | -1.092139 |
| C25 | 9.756493 | 24.968268 | -2.419528 |
| C26 | 8.360778 | 24.702508 | -2.638326 |
| C27 | 7.783449 | 24.488845 | -3.895268 |
| H28 | 8.439701 | 24.505995 | -4.759794 |
| C29 | 3.011095 | 23.928960 | -3.220456 |

|     |           |           |           |
|-----|-----------|-----------|-----------|
| H30 | 2.173174  | 23.693737 | -3.867700 |
| C31 | 3.611940  | 24.587633 | 1.530805  |
| H32 | 2.973769  | 24.644206 | 2.402885  |
| C33 | 8.363049  | 25.194154 | 0.874934  |
| H34 | 9.216927  | 25.512598 | 1.458686  |
| C35 | 7.457367  | 31.388839 | -1.980641 |
| C36 | 8.599823  | 31.255867 | -1.181918 |
| C37 | 9.372719  | 32.369169 | -0.833879 |
| C38 | 9.029041  | 33.652105 | -1.272851 |
| C39 | 7.924791  | 33.782288 | -2.117655 |
| C40 | 7.157912  | 32.670942 | -2.467052 |
| H41 | 6.272688  | 32.802839 | -3.091876 |
| H42 | 7.634876  | 34.775720 | -2.460581 |
| H43 | 10.224259 | 32.241408 | -0.161778 |
| H44 | 8.868620  | 30.279317 | -0.776940 |
| C45 | 9.709377  | 34.894357 | -0.690144 |
| C46 | 10.349239 | 35.876908 | -1.757445 |
| O47 | 11.238732 | 35.398786 | -2.467705 |
| O48 | 9.955053  | 37.032422 | -1.710732 |
| H49 | 10.552493 | 34.529999 | -0.083923 |
| C50 | 8.719521  | 35.654658 | 0.223326  |
| H51 | 8.250607  | 34.972341 | 0.933234  |
| H52 | 7.930613  | 36.104645 | -0.381334 |
| H53 | 9.207662  | 36.457885 | 0.787874  |
| C54 | 6.508736  | 30.231337 | -2.271117 |
| C55 | 6.939657  | 29.234713 | -3.384401 |
| C56 | 5.706698  | 28.499252 | -3.937833 |
| C57 | 7.941376  | 28.201594 | -2.848676 |
| H58 | 7.429843  | 27.554635 | -2.121156 |
| H59 | 8.800685  | 28.680668 | -2.368987 |
| H60 | 8.313272  | 27.559167 | -3.656386 |
| H61 | 5.991787  | 27.810239 | -4.742335 |
| H62 | 4.960985  | 29.199183 | -4.333886 |
| H63 | 5.245337  | 27.901519 | -3.144504 |
| H64 | 7.408289  | 29.814663 | -4.194127 |
| H65 | 5.538341  | 30.661281 | -2.547832 |
| H66 | 6.342373  | 29.648205 | -1.356328 |
| H67 | 7.353758  | 20.847559 | -2.698160 |
| H68 | 6.398486  | 23.966821 | -6.373328 |
| H69 | 3.728167  | 23.701233 | -5.971529 |
| H70 | 0.530593  | 23.842454 | -1.838329 |
| H71 | 0.912689  | 24.188457 | 0.944143  |
| H72 | 4.883601  | 25.100513 | 3.950716  |
| H73 | 7.505405  | 25.354941 | 3.792724  |
| H74 | 10.788118 | 25.492243 | -0.525128 |
| H75 | 10.502414 | 24.961134 | -3.205022 |

Ibuprofen 3-6 Transition State Doublet

|     |          |           |           |
|-----|----------|-----------|-----------|
| C1  | 6.332149 | 21.278513 | -2.408566 |
| S2  | 6.148610 | 22.236474 | -0.845559 |
| H3  | 5.692258 | 20.399756 | -2.292627 |
| H4  | 5.958499 | 21.861657 | -3.249317 |
| O5  | 5.615286 | 26.461156 | -1.363401 |
| Fe6 | 5.740709 | 24.732410 | -1.236946 |
| N7  | 5.503950 | 24.335487 | -3.186815 |
| N8  | 3.729159 | 24.459630 | -0.948047 |
| N9  | 6.001284 | 24.791077 | 0.785029  |
| N10 | 7.712746 | 24.777056 | -1.482302 |
| C11 | 6.476922 | 24.308916 | -4.153875 |

|     |           |           |           |
|-----|-----------|-----------|-----------|
| C12 | 5.897482  | 24.047455 | -5.450087 |
| C13 | 4.556585  | 23.912771 | -5.248348 |
| C14 | 4.321376  | 24.092357 | -3.836197 |
| C15 | 2.787459  | 24.188711 | -1.896527 |
| C16 | 1.473276  | 24.036821 | -1.295743 |
| C17 | 1.640170  | 24.203942 | 0.046682  |
| C18 | 3.056701  | 24.452277 | 0.236536  |
| C19 | 5.003034  | 24.784000 | 1.711516  |
| C20 | 5.527367  | 25.018109 | 3.026473  |
| C21 | 6.876123  | 25.166716 | 2.904460  |
| C22 | 7.162786  | 25.031500 | 1.482407  |
| C23 | 8.631770  | 25.076429 | -0.513604 |
| C24 | 9.942127  | 25.201227 | -1.098022 |
| C25 | 9.805026  | 24.950257 | -2.430492 |
| C26 | 8.407108  | 24.698494 | -2.661982 |
| C27 | 7.831677  | 24.487228 | -3.908041 |
| H28 | 8.490105  | 24.475528 | -4.767447 |
| C29 | 3.064401  | 24.011767 | -3.247207 |
| H30 | 2.236412  | 23.760099 | -3.897141 |
| C31 | 3.650917  | 24.600064 | 1.478710  |
| H32 | 3.016620  | 24.617994 | 2.352795  |
| C33 | 8.384409  | 25.209266 | 0.845846  |
| H34 | 9.239258  | 25.501987 | 1.435913  |
| C35 | 7.427868  | 31.337747 | -1.945162 |
| C36 | 8.562876  | 31.203473 | -1.133005 |
| C37 | 9.351980  | 32.313692 | -0.797795 |
| C38 | 9.041352  | 33.596152 | -1.268745 |
| C39 | 7.955134  | 33.722384 | -2.137110 |
| C40 | 7.167686  | 32.615887 | -2.468308 |
| H41 | 6.301691  | 32.756083 | -3.108130 |
| H42 | 7.694160  | 34.704585 | -2.517336 |
| H43 | 10.184079 | 32.182840 | -0.112816 |
| H44 | 8.815556  | 30.239024 | -0.706648 |
| C45 | 9.729655  | 34.832634 | -0.688969 |
| C46 | 10.357258 | 35.812360 | -1.726988 |
| O47 | 11.249157 | 35.348500 | -2.490970 |
| O48 | 9.993934  | 37.009328 | -1.658965 |
| H49 | 10.571956 | 34.464493 | -0.087298 |
| C50 | 8.747895  | 35.588013 | 0.236871  |
| H51 | 8.277680  | 34.904893 | 0.942942  |
| H52 | 7.958382  | 36.049491 | -0.357435 |
| H53 | 9.247026  | 36.379939 | 0.805036  |
| C54 | 6.434901  | 30.203656 | -2.189237 |
| C55 | 6.876788  | 29.021986 | -3.107035 |
| C56 | 5.688696  | 28.519555 | -3.949661 |
| C57 | 7.467570  | 27.831692 | -2.350170 |
| H58 | 6.522217  | 27.132981 | -1.828796 |
| H59 | 8.138393  | 28.096219 | -1.531007 |
| H60 | 7.964577  | 27.139275 | -3.029514 |
| H61 | 6.007240  | 27.715482 | -4.622023 |
| H62 | 5.251936  | 29.322638 | -4.550129 |
| H63 | 4.918058  | 28.108867 | -3.289933 |
| H64 | 7.644624  | 29.406671 | -3.797019 |
| H65 | 5.536901  | 30.655046 | -2.623975 |
| H66 | 6.125228  | 29.781507 | -1.226673 |
| H67 | 7.336792  | 20.890458 | -2.695897 |
| H68 | 6.442095  | 23.986285 | -6.390829 |
| H69 | 3.769663  | 23.732410 | -5.977912 |
| H70 | 0.571126  | 23.842407 | -1.870838 |
| H71 | 0.957259  | 24.166951 | 0.909125  |

|     |           |           |           |
|-----|-----------|-----------|-----------|
| H72 | 4.893364  | 25.035785 | 3.907923  |
| H73 | 7.511074  | 25.335399 | 3.776882  |
| H74 | 10.817122 | 25.486066 | -0.523137 |
| H75 | 10.541745 | 24.940174 | -3.212169 |

Ibuprofen 3-6 Transition State Quartet

|     |           |           |           |
|-----|-----------|-----------|-----------|
| C1  | 6.333176  | 21.290038 | -2.415518 |
| S2  | 6.199369  | 22.289270 | -0.854490 |
| H3  | 5.682764  | 20.416589 | -2.275368 |
| H4  | 5.955352  | 21.867726 | -3.264602 |
| O5  | 5.576930  | 26.460114 | -1.411511 |
| Fe6 | 5.712595  | 24.687336 | -1.215276 |
| N7  | 5.490379  | 24.305795 | -3.193553 |
| N8  | 3.716114  | 24.446128 | -0.939191 |
| N9  | 5.990418  | 24.795097 | 0.800631  |
| N10 | 7.729384  | 24.804216 | -1.478414 |
| C11 | 6.467092  | 24.289404 | -4.148510 |
| C12 | 5.893529  | 24.039729 | -5.447730 |
| C13 | 4.556886  | 23.912812 | -5.252925 |
| C14 | 4.320118  | 24.081890 | -3.842356 |
| C15 | 2.779042  | 24.188612 | -1.891557 |
| C16 | 1.464948  | 24.051831 | -1.290074 |
| C17 | 1.629542  | 24.215540 | 0.044618  |
| C18 | 3.047043  | 24.450444 | 0.241197  |
| C19 | 5.001658  | 24.788310 | 1.724313  |
| C20 | 5.530951  | 25.022866 | 3.034504  |
| C21 | 6.871756  | 25.169956 | 2.908822  |
| C22 | 7.155970  | 25.035973 | 1.488903  |
| C23 | 8.636475  | 25.095440 | -0.519823 |
| C24 | 9.948253  | 25.213620 | -1.100529 |
| C25 | 9.810112  | 24.956726 | -2.425707 |
| C26 | 8.410255  | 24.708052 | -2.648849 |
| C27 | 7.836259  | 24.475286 | -3.910776 |
| H28 | 8.494585  | 24.459795 | -4.771923 |
| C29 | 3.043514  | 24.011566 | -3.252762 |
| H30 | 2.209750  | 23.775871 | -3.905603 |
| C31 | 3.634799  | 24.603617 | 1.495019  |
| H32 | 2.998206  | 24.630996 | 2.370993  |
| C33 | 8.392252  | 25.221906 | 0.859406  |
| H34 | 9.245781  | 25.515121 | 1.454167  |
| C35 | 7.416070  | 31.340282 | -1.947016 |
| C36 | 8.550339  | 31.207525 | -1.135523 |
| C37 | 9.340811  | 32.316446 | -0.808859 |
| C38 | 9.029595  | 33.595129 | -1.287754 |
| C39 | 7.943888  | 33.718061 | -2.157135 |
| C40 | 7.156250  | 32.611754 | -2.480159 |
| H41 | 6.284228  | 32.745647 | -3.124248 |
| H42 | 7.683410  | 34.703800 | -2.543312 |
| H43 | 10.178045 | 32.189050 | -0.120231 |
| H44 | 8.800956  | 30.239038 | -0.701722 |
| C45 | 9.715129  | 34.839287 | -0.708304 |
| C46 | 10.358781 | 35.837844 | -1.761333 |
| O47 | 11.253827 | 35.370411 | -2.473794 |
| O48 | 9.969303  | 36.994475 | -1.700600 |
| H49 | 10.558533 | 34.472705 | -0.104222 |
| C50 | 8.728184  | 35.595580 | 0.211864  |
| H51 | 8.257805  | 34.911604 | 0.918967  |
| H52 | 7.940170  | 36.053478 | -0.388091 |
| H53 | 9.221625  | 36.392567 | 0.780310  |

|     |           |           |           |
|-----|-----------|-----------|-----------|
| C54 | 6.425820  | 30.199779 | -2.186801 |
| C55 | 6.869961  | 29.039098 | -3.129144 |
| C56 | 5.673246  | 28.521544 | -3.957392 |
| C57 | 7.534605  | 27.885713 | -2.412199 |
| H58 | 6.443670  | 27.036451 | -1.809274 |
| H59 | 8.144256  | 28.105736 | -1.537286 |
| H60 | 7.964396  | 27.124727 | -3.060432 |
| H61 | 5.985919  | 27.736417 | -4.654914 |
| H62 | 5.215290  | 29.331975 | -4.532755 |
| H63 | 4.919758  | 28.087507 | -3.291663 |
| H64 | 7.609479  | 29.455387 | -3.839037 |
| H65 | 5.515186  | 30.644804 | -2.602006 |
| H66 | 6.135097  | 29.759919 | -1.225339 |
| H67 | 7.336196  | 20.890697 | -2.705892 |
| H68 | 6.442225  | 23.978056 | -6.393578 |
| H69 | 3.769595  | 23.734400 | -5.988105 |
| H70 | 0.559986  | 23.854948 | -1.867290 |
| H71 | 0.942429  | 24.180287 | 0.908513  |
| H72 | 4.897795  | 25.040694 | 3.922523  |
| H73 | 7.513249  | 25.338315 | 3.784820  |
| H74 | 10.830652 | 25.494159 | -0.525119 |
| H75 | 10.551937 | 24.938633 | -3.211331 |

Warfarin 6-1 Reactant Complex Doublet

|     |           |           |           |
|-----|-----------|-----------|-----------|
| C1  | -0.932689 | 2.052292  | -4.812118 |
| H2  | -1.711416 | 1.537447  | -5.382511 |
| H3  | -1.440856 | 2.637278  | -4.048882 |
| S4  | 0.084919  | 0.737285  | -4.054998 |
| O5  | 0.680219  | 1.075708  | -0.011126 |
| Fe6 | 0.330387  | 1.017352  | -1.610376 |
| N7  | -1.092224 | 2.437615  | -1.615545 |
| N8  | -1.091064 | -0.379744 | -1.296915 |
| N9  | 1.729025  | -0.417374 | -1.896713 |
| N10 | 1.718308  | 2.426808  | -2.082268 |
| C11 | -0.908501 | 3.783343  | -1.771188 |
| C12 | -2.147094 | 4.489869  | -1.601931 |
| C13 | -3.105650 | 3.549693  | -1.376156 |
| C14 | -2.435722 | 2.271154  | -1.389485 |
| C15 | -2.421338 | -0.179605 | -1.087039 |
| C16 | -3.073138 | -1.420902 | -0.723113 |
| C17 | -2.100345 | -2.374383 | -0.687836 |
| C18 | -0.874234 | -1.705994 | -1.080260 |
| C19 | 1.531868  | -1.744178 | -1.674377 |
| C20 | 2.762503  | -2.466878 | -1.854052 |
| C21 | 3.726035  | -1.555351 | -2.172233 |
| C22 | 3.070926  | -0.255160 | -2.155507 |
| C23 | 3.065840  | 2.230100  | -2.168481 |
| C24 | 3.749908  | 3.502012  | -2.288280 |
| C25 | 2.788599  | 4.467173  | -2.318610 |
| C26 | 1.527454  | 3.782593  | -2.162964 |
| C27 | 0.302597  | 4.409750  | -2.036583 |
| H28 | 0.287281  | 5.490226  | -2.098330 |
| C29 | -3.061881 | 1.052033  | -1.172162 |
| H30 | -4.133792 | 1.072436  | -1.035735 |
| C31 | 0.343942  | -2.343163 | -1.267825 |
| H32 | 0.394658  | -3.398599 | -1.044491 |
| C33 | 3.691766  | 0.988314  | -2.210526 |
| H34 | 4.770951  | 1.018160  | -2.237628 |
| C35 | 1.073011  | 2.437423  | 3.175122  |

|     |           |           |           |
|-----|-----------|-----------|-----------|
| H36 | 0.729240  | 1.651022  | 3.836488  |
| C37 | 0.221936  | 2.895325  | 2.188283  |
| H38 | -0.751595 | 2.445664  | 2.060610  |
| C39 | 0.655825  | 3.880928  | 1.290799  |
| H40 | -0.016973 | 4.222487  | 0.517390  |
| C41 | 1.932285  | 4.410064  | 1.380107  |
| H42 | 2.290035  | 5.160768  | 0.686363  |
| C43 | 2.763054  | 3.991556  | 2.420429  |
| O44 | 3.977751  | 4.596663  | 2.543518  |
| C45 | 4.715604  | 4.578333  | 3.728852  |
| O46 | 5.670774  | 5.318673  | 3.768591  |
| C47 | 4.235388  | 3.679914  | 4.758072  |
| C48 | 3.171095  | 2.842193  | 4.516942  |
| O49 | 2.845539  | 1.945930  | 5.453040  |
| H50 | 1.988712  | 1.545484  | 5.310402  |
| C51 | 2.348901  | 3.017847  | 3.338331  |
| H52 | -0.462875 | 2.760079  | -5.527962 |
| H53 | -2.240402 | 5.566185  | -1.631807 |
| H54 | -4.164125 | 3.712680  | -1.195807 |
| H55 | -4.138408 | -1.503852 | -0.529311 |
| H56 | -2.104836 | -3.435923 | -0.418599 |
| H57 | 2.835368  | -3.546732 | -1.798672 |
| H58 | 4.752615  | -1.848478 | -2.407659 |
| H59 | 4.829082  | 3.617300  | -2.306652 |
| H60 | 2.868314  | 5.541648  | -2.485799 |
| H61 | 4.465888  | 3.924696  | 5.815414  |

Warfarin 6-1 Reactant Complex Quartet

|     |           |           |           |
|-----|-----------|-----------|-----------|
| C1  | -0.927294 | 2.052237  | -4.812614 |
| H2  | -1.703488 | 1.529775  | -5.380588 |
| H3  | -1.437184 | 2.636257  | -4.049914 |
| S4  | 0.097314  | 0.744388  | -4.056736 |
| O5  | 0.645000  | 1.061244  | -0.005917 |
| Fe6 | 0.337950  | 1.011373  | -1.608679 |
| N7  | -1.088868 | 2.433443  | -1.614157 |
| N8  | -1.089121 | -0.389725 | -1.307114 |
| N9  | 1.731264  | -0.419966 | -1.899402 |
| N10 | 1.722624  | 2.419854  | -2.074289 |
| C11 | -0.907307 | 3.776122  | -1.768957 |
| C12 | -2.146731 | 4.482723  | -1.599749 |
| C13 | -3.103622 | 3.542399  | -1.371730 |
| C14 | -2.433344 | 2.263224  | -1.384766 |
| C15 | -2.416145 | -0.187987 | -1.091721 |
| C16 | -3.067779 | -1.429565 | -0.724063 |
| C17 | -2.095230 | -2.383379 | -0.687812 |
| C18 | -0.867968 | -1.716735 | -1.084505 |
| C19 | 1.534548  | -1.747556 | -1.680875 |
| C20 | 2.765086  | -2.469087 | -1.864910 |
| C21 | 3.728518  | -1.557450 | -2.179547 |
| C22 | 3.075969  | -0.256849 | -2.156941 |
| C23 | 3.068835  | 2.226293  | -2.160840 |
| C24 | 3.750043  | 3.499562  | -2.285164 |
| C25 | 2.787863  | 4.462718  | -2.317906 |
| C26 | 1.527718  | 3.777895  | -2.159657 |
| C27 | 0.304868  | 4.403974  | -2.035988 |
| H28 | 0.288413  | 5.484197  | -2.103417 |
| C29 | -3.056876 | 1.044979  | -1.170881 |
| H30 | -4.128881 | 1.065221  | -1.030067 |
| C31 | 0.347427  | -2.348686 | -1.269399 |



|     |           |           |           |
|-----|-----------|-----------|-----------|
| H32 | 0.405426  | -3.403187 | -1.038321 |
| C33 | 3.697479  | 0.984190  | -2.201488 |
| H34 | 4.777068  | 1.014177  | -2.221571 |
| C35 | 1.072557  | 2.432633  | 3.170644  |
| H36 | 0.729134  | 1.647942  | 3.833384  |
| C37 | 0.217162  | 2.893321  | 2.189681  |
| H38 | -0.757499 | 2.444250  | 2.066117  |
| C39 | 0.646658  | 3.879257  | 1.291126  |
| H40 | -0.028668 | 4.222568  | 0.521451  |
| C41 | 1.923289  | 4.410532  | 1.377072  |
| H42 | 2.276683  | 5.160649  | 0.681294  |
| C43 | 2.756735  | 3.993444  | 2.415840  |
| O44 | 3.967829  | 4.604920  | 2.539803  |
| C45 | 4.709072  | 4.579739  | 3.722876  |
| O46 | 5.666965  | 5.320329  | 3.762781  |
| C47 | 4.233224  | 3.678323  | 4.750240  |
| C48 | 3.172589  | 2.838286  | 4.507767  |
| O49 | 2.849415  | 1.936270  | 5.441552  |
| H50 | 1.995770  | 1.535676  | 5.301097  |
| C51 | 2.347791  | 3.014623  | 3.330239  |
| H52 | -0.462999 | 2.757656  | -5.533312 |
| H53 | -2.241097 | 5.559461  | -1.629274 |
| H54 | -4.162343 | 3.705876  | -1.192333 |
| H55 | -4.132708 | -1.511284 | -0.528343 |
| H56 | -2.099271 | -3.443990 | -0.416443 |
| H57 | 2.839163  | -3.548801 | -1.809397 |
| H58 | 4.754748  | -1.848073 | -2.416373 |
| H59 | 4.828921  | 3.617338  | -2.304572 |
| H60 | 2.866423  | 5.538048  | -2.484932 |
| H61 | 4.463658  | 3.920103  | 5.808974  |

Warfarin 6-1 Transition State Doublet

|     |           |           |           |
|-----|-----------|-----------|-----------|
| C1  | -0.903433 | 2.024337  | -4.704474 |
| H2  | -1.653713 | 1.436845  | -5.242071 |
| H3  | -1.438546 | 2.627094  | -3.973410 |
| S4  | 0.175803  | 0.795782  | -3.863058 |
| O5  | 0.818329  | 1.172519  | 0.296391  |
| Fe6 | 0.363384  | 1.129524  | -1.422241 |
| N7  | -1.063754 | 2.513584  | -1.473976 |
| N8  | -1.048543 | -0.303356 | -1.094367 |
| N9  | 1.767915  | -0.339594 | -1.670322 |
| N10 | 1.720995  | 2.514381  | -1.927700 |
| C11 | -0.913607 | 3.848398  | -1.751293 |
| C12 | -2.165624 | 4.535518  | -1.610583 |
| C13 | -3.104695 | 3.593056  | -1.327233 |
| C14 | -2.412728 | 2.329082  | -1.257873 |
| C15 | -2.387718 | -0.118173 | -0.926382 |
| C16 | -3.048442 | -1.376616 | -0.637558 |
| C17 | -2.074960 | -2.329764 | -0.613068 |
| C18 | -0.838477 | -1.642412 | -0.938336 |
| C19 | 1.562766  | -1.673801 | -1.511094 |
| C20 | 2.777662  | -2.403474 | -1.767780 |
| C21 | 3.737110  | -1.490460 | -2.084844 |
| C22 | 3.094818  | -0.182737 | -1.991402 |
| C23 | 3.066860  | 2.305049  | -2.032536 |
| C24 | 3.746643  | 3.566139  | -2.226284 |
| C25 | 2.786340  | 4.530688  | -2.298285 |
| C26 | 1.523234  | 3.860905  | -2.113559 |
| C27 | 0.284422  | 4.476361  | -2.072608 |

|     |           |           |           |
|-----|-----------|-----------|-----------|
| H28 | 0.246672  | 5.547280  | -2.223154 |
| C29 | -3.030216 | 1.110604  | -1.021199 |
| H30 | -4.105852 | 1.121181  | -0.915666 |
| C31 | 0.370268  | -2.282815 | -1.142094 |
| H32 | 0.406791  | -3.350402 | -0.984679 |
| C33 | 3.701938  | 1.065274  | -2.074969 |
| H34 | 4.777399  | 1.105463  | -2.162437 |
| C35 | 1.232476  | 2.099430  | 2.739435  |
| H36 | 0.908357  | 1.289310  | 3.379728  |
| C37 | 0.451284  | 2.393987  | 1.566034  |
| H38 | -0.594389 | 2.101931  | 1.592758  |
| C39 | 0.758110  | 3.641782  | 0.928230  |
| H40 | 0.055475  | 4.032764  | 0.218866  |
| C41 | 1.920456  | 4.326831  | 1.176830  |
| H42 | 2.187976  | 5.214239  | 0.617055  |
| C43 | 2.744169  | 3.916878  | 2.228822  |
| O44 | 3.868676  | 4.629198  | 2.449686  |
| C45 | 4.606920  | 4.566283  | 3.641336  |
| O46 | 5.549793  | 5.314668  | 3.710957  |
| C47 | 4.114365  | 3.639453  | 4.636293  |
| C48 | 3.094594  | 2.766430  | 4.342866  |
| O49 | 2.738855  | 1.876610  | 5.270269  |
| H50 | 1.905953  | 1.447425  | 5.083501  |
| C51 | 2.360498  | 2.852713  | 3.078677  |
| H52 | -0.468163 | 2.721724  | -5.465863 |
| H53 | -2.262797 | 5.607151  | -1.649399 |
| H54 | -4.169794 | 3.739490  | -1.170471 |
| H55 | -4.119944 | -1.485411 | -0.501398 |
| H56 | -2.086766 | -3.404385 | -0.385748 |
| H57 | 2.838373  | -3.488784 | -1.777634 |
| H58 | 4.744816  | -1.798119 | -2.377963 |
| H59 | 4.826806  | 3.661224  | -2.278603 |
| H60 | 2.871359  | 5.596586  | -2.485581 |
| H61 | 4.364520  | 3.865480  | 5.701327  |

Warfarin 6-1 Transition State Quartet

|     |           |           |           |
|-----|-----------|-----------|-----------|
| C1  | -0.918499 | 2.013559  | -4.728641 |
| H2  | -1.653755 | 1.416281  | -5.274864 |
| H3  | -1.470628 | 2.608282  | -4.002479 |
| S4  | 0.170496  | 0.806908  | -3.875038 |
| O5  | 0.673340  | 1.283681  | 0.271653  |
| Fe6 | 0.384679  | 1.080036  | -1.436756 |
| N7  | -1.067580 | 2.477906  | -1.535179 |
| N8  | -1.031399 | -0.333266 | -1.119346 |
| N9  | 1.765523  | -0.348274 | -1.688859 |
| N10 | 1.747268  | 2.488944  | -1.923174 |
| C11 | -0.902650 | 3.817720  | -1.774174 |
| C12 | -2.152959 | 4.505369  | -1.623251 |
| C13 | -3.096857 | 3.559690  | -1.354086 |
| C14 | -2.408979 | 2.293889  | -1.308377 |
| C15 | -2.377235 | -0.140792 | -0.953732 |
| C16 | -3.033580 | -1.398351 | -0.651080 |
| C17 | -2.060723 | -2.350511 | -0.621593 |
| C18 | -0.823552 | -1.670463 | -0.954946 |
| C19 | 1.561915  | -1.693518 | -1.530491 |
| C20 | 2.780441  | -2.409172 | -1.789906 |
| C21 | 3.738307  | -1.492434 | -2.105554 |
| C22 | 3.101417  | -0.187261 | -2.011876 |
| C23 | 3.087856  | 2.288201  | -2.034212 |

|     |           |           |           |
|-----|-----------|-----------|-----------|
| C24 | 3.761069  | 3.554671  | -2.223259 |
| C25 | 2.793907  | 4.513056  | -2.285668 |
| C26 | 1.534804  | 3.832266  | -2.099065 |
| C27 | 0.297970  | 4.448953  | -2.064451 |
| H28 | 0.264328  | 5.522819  | -2.192411 |
| C29 | -3.025010 | 1.076392  | -1.060790 |
| H30 | -4.099763 | 1.086600  | -0.946787 |
| C31 | 0.384754  | -2.310872 | -1.157531 |
| H32 | 0.426339  | -3.377817 | -0.995590 |
| C33 | 3.721079  | 1.050093  | -2.089205 |
| H34 | 4.796145  | 1.081648  | -2.174514 |
| C35 | 1.214964  | 2.122550  | 2.764701  |
| H36 | 0.883085  | 1.320714  | 3.408407  |
| C37 | 0.411835  | 2.442741  | 1.612695  |
| H38 | -0.628524 | 2.149207  | 1.657327  |
| C39 | 0.721553  | 3.697890  | 0.982974  |
| H40 | 0.008182  | 4.089717  | 0.279220  |
| C41 | 1.890460  | 4.362391  | 1.216770  |
| H42 | 2.156775  | 5.259157  | 0.669843  |
| C43 | 2.736337  | 3.931980  | 2.252396  |
| O44 | 3.862852  | 4.641958  | 2.464618  |
| C45 | 4.612605  | 4.570326  | 3.649566  |
| O46 | 5.558545  | 5.314596  | 3.716175  |
| C47 | 4.124823  | 3.639743  | 4.643542  |
| C48 | 3.101652  | 2.767364  | 4.350311  |
| O49 | 2.754645  | 1.875812  | 5.280085  |
| H50 | 1.914412  | 1.452935  | 5.109709  |
| C51 | 2.360712  | 2.863024  | 3.090801  |
| H52 | -0.477016 | 2.713568  | -5.484939 |
| H53 | -2.255240 | 5.578523  | -1.648624 |
| H54 | -4.159983 | 3.712193  | -1.180477 |
| H55 | -4.105120 | -1.504978 | -0.507014 |
| H56 | -2.069174 | -3.421662 | -0.387090 |
| H57 | 2.844557  | -3.494428 | -1.799388 |
| H58 | 4.749463  | -1.798198 | -2.392764 |
| H59 | 4.839149  | 3.656612  | -2.279330 |
| H60 | 2.872423  | 5.581053  | -2.472328 |
| H61 | 4.376510  | 3.862147  | 5.710461  |

Warfarin 6-2 Reactant Complex Doublet

|     |           |           |           |
|-----|-----------|-----------|-----------|
| C1  | -0.951599 | 1.818003  | -4.863350 |
| H2  | -1.693113 | 1.232122  | -5.419580 |
| H3  | -1.496151 | 2.388142  | -4.112170 |
| S4  | 0.169895  | 0.625516  | -4.063650 |
| O5  | 0.686263  | 1.100015  | -0.023082 |
| Fe6 | 0.367418  | 1.014528  | -1.629224 |
| N7  | -1.065333 | 2.434358  | -1.664944 |
| N8  | -1.053625 | -0.382692 | -1.320263 |
| N9  | 1.778806  | -0.410083 | -1.885701 |
| N10 | 1.752433  | 2.428098  | -2.096119 |
| C11 | -0.883378 | 3.781999  | -1.818140 |
| C12 | -2.123197 | 4.484951  | -1.633186 |
| C13 | -3.077153 | 3.541962  | -1.403698 |
| C14 | -2.404786 | 2.264972  | -1.423720 |
| C15 | -2.384773 | -0.184342 | -1.108176 |
| C16 | -3.035568 | -1.430011 | -0.753270 |
| C17 | -2.060699 | -2.382254 | -0.731861 |
| C18 | -0.835677 | -1.707983 | -1.117885 |
| C19 | 1.580101  | -1.739535 | -1.677952 |

|     |           |           |           |
|-----|-----------|-----------|-----------|
| C20 | 2.812109  | -2.460184 | -1.856482 |
| C21 | 3.775290  | -1.546118 | -2.169672 |
| C22 | 3.119028  | -0.247338 | -2.146662 |
| C23 | 3.101523  | 2.236033  | -2.178587 |
| C24 | 3.784418  | 3.508538  | -2.285232 |
| C25 | 2.822237  | 4.471097  | -2.298129 |
| C26 | 1.559562  | 3.783352  | -2.168737 |
| C27 | 0.330023  | 4.408638  | -2.073308 |
| H28 | 0.313579  | 5.488963  | -2.151704 |
| C29 | -3.026545 | 1.045193  | -1.190572 |
| H30 | -4.097323 | 1.065851  | -1.040957 |
| C31 | 0.387187  | -2.342798 | -1.297698 |
| H32 | 0.438683  | -3.400825 | -1.085184 |
| C33 | 3.734254  | 0.998694  | -2.213711 |
| H34 | 4.813473  | 1.038926  | -2.235980 |
| C35 | 1.133865  | 2.554243  | 3.133579  |
| H36 | 0.782196  | 1.781603  | 3.809951  |
| C37 | 0.295329  | 2.992777  | 2.128349  |
| H38 | -0.676229 | 2.537765  | 1.991616  |
| C39 | 0.739630  | 3.966808  | 1.223087  |
| H40 | 0.080606  | 4.287144  | 0.430539  |
| C41 | 2.001682  | 4.521735  | 1.336864  |
| H42 | 2.360150  | 5.275677  | 0.643130  |
| C43 | 2.815377  | 4.135897  | 2.401865  |
| O44 | 3.998163  | 4.793500  | 2.569555  |
| C45 | 4.696614  | 4.780713  | 3.775684  |
| O46 | 5.597559  | 5.585174  | 3.876370  |
| C47 | 4.261538  | 3.809472  | 4.753800  |
| C48 | 3.233705  | 2.939712  | 4.469077  |
| O49 | 2.948181  | 1.987256  | 5.358387  |
| H50 | 2.135638  | 1.517270  | 5.163959  |
| C51 | 2.404993  | 3.142445  | 3.301191  |
| H52 | -0.518823 | 2.534201  | -5.587810 |
| H53 | -2.232053 | 5.559946  | -1.645070 |
| H54 | -4.135397 | 3.707047  | -1.220840 |
| H55 | -4.099720 | -1.510333 | -0.545617 |
| H56 | -2.058633 | -3.444605 | -0.474778 |
| H57 | 2.885109  | -3.539841 | -1.802832 |
| H58 | 4.800122  | -1.836824 | -2.411896 |
| H59 | 4.863712  | 3.618136  | -2.324017 |
| H60 | 2.898319  | 5.546188  | -2.435783 |
| H61 | 4.485874  | 4.006992  | 5.820773  |

Warfarin 6-2 Reactant Complex Quartet

|     |           |           |           |
|-----|-----------|-----------|-----------|
| C1  | -0.947454 | 1.820630  | -4.861616 |
| H2  | -1.687477 | 1.228989  | -5.414521 |
| H3  | -1.492010 | 2.390573  | -4.110742 |
| S4  | 0.179998  | 0.637386  | -4.060535 |
| O5  | 0.653176  | 1.086823  | -0.016379 |
| Fe6 | 0.371127  | 1.012278  | -1.624775 |
| N7  | -1.064107 | 2.434448  | -1.664214 |
| N8  | -1.056490 | -0.386235 | -1.326405 |
| N9  | 1.776777  | -0.410581 | -1.883001 |
| N10 | 1.753571  | 2.424896  | -2.087559 |
| C11 | -0.883586 | 3.780214  | -1.816542 |
| C12 | -2.123439 | 4.484219  | -1.632282 |
| C13 | -3.077582 | 3.540537  | -1.402957 |
| C14 | -2.405336 | 2.263641  | -1.423254 |
| C15 | -2.385090 | -0.185454 | -1.111068 |

|     |           |           |           |
|-----|-----------|-----------|-----------|
| C16 | -3.037032 | -1.429098 | -0.751181 |
| C17 | -2.063975 | -2.383608 | -0.729110 |
| C18 | -0.837128 | -1.713190 | -1.118883 |
| C19 | 1.576688  | -1.740029 | -1.678823 |
| C20 | 2.809157  | -2.459056 | -1.857127 |
| C21 | 3.772336  | -1.547102 | -2.167224 |
| C22 | 3.119221  | -0.247004 | -2.142331 |
| C23 | 3.101628  | 2.234391  | -2.172273 |
| C24 | 3.783293  | 3.507341  | -2.282669 |
| C25 | 2.820904  | 4.469800  | -2.296738 |
| C26 | 1.558613  | 3.782275  | -2.164836 |
| C27 | 0.330944  | 4.407954  | -2.072469 |
| H28 | 0.314496  | 5.487078  | -2.152988 |
| C29 | -3.026616 | 1.045472  | -1.193349 |
| H30 | -4.096773 | 1.067845  | -1.040609 |
| C31 | 0.382549  | -2.344926 | -1.297659 |
| H32 | 0.437373  | -3.402191 | -1.078551 |
| C33 | 3.735450  | 0.996799  | -2.206051 |
| H34 | 4.814310  | 1.037670  | -2.225218 |
| C35 | 1.134951  | 2.551904  | 3.130951  |
| H36 | 0.786823  | 1.774855  | 3.802842  |
| C37 | 0.296290  | 2.993137  | 2.126520  |
| H38 | -0.674867 | 2.538272  | 1.989594  |
| C39 | 0.740483  | 3.966551  | 1.221899  |
| H40 | 0.083806  | 4.287934  | 0.428787  |
| C41 | 2.006411  | 4.521363  | 1.333880  |
| H42 | 2.362317  | 5.274150  | 0.642246  |
| C43 | 2.816566  | 4.133765  | 2.400908  |
| O44 | 3.998396  | 4.796421  | 2.571838  |
| C45 | 4.697132  | 4.782069  | 3.778906  |
| O46 | 5.596534  | 5.585020  | 3.880253  |
| C47 | 4.259866  | 3.808910  | 4.752614  |
| C48 | 3.235126  | 2.938928  | 4.466385  |
| O49 | 2.948084  | 1.982111  | 5.354043  |
| H50 | 2.136512  | 1.517534  | 5.162654  |
| C51 | 2.407142  | 3.141232  | 3.298434  |
| H52 | -0.518925 | 2.534170  | -5.589676 |
| H53 | -2.233362 | 5.559825  | -1.644505 |
| H54 | -4.135673 | 3.705965  | -1.218439 |
| H55 | -4.101147 | -1.508937 | -0.544290 |
| H56 | -2.066568 | -3.445678 | -0.470233 |
| H57 | 2.883784  | -3.538293 | -1.808459 |
| H58 | 4.796214  | -1.838353 | -2.409537 |
| H59 | 4.862569  | 3.618840  | -2.322940 |
| H60 | 2.898108  | 5.546214  | -2.435966 |
| H61 | 4.481171  | 4.002949  | 5.819247  |

Warfarin 6-2 Transition State Doublet

|     |           |           |           |
|-----|-----------|-----------|-----------|
| C1  | -0.920079 | 1.816264  | -4.732316 |
| H2  | -1.647437 | 1.180862  | -5.249742 |
| H3  | -1.475448 | 2.409141  | -4.006492 |
| S4  | 0.237439  | 0.686109  | -3.869089 |
| O5  | 0.856075  | 1.233128  | 0.283154  |
| Fe6 | 0.406146  | 1.131433  | -1.431605 |
| N7  | -1.031010 | 2.514127  | -1.517516 |
| N8  | -1.008281 | -0.298098 | -1.099052 |
| N9  | 1.817450  | -0.332881 | -1.655135 |
| N10 | 1.754997  | 2.511461  | -1.967995 |
| C11 | -0.884215 | 3.849273  | -1.798269 |

|     |           |           |           |
|-----|-----------|-----------|-----------|
| C12 | -2.135171 | 4.536256  | -1.640518 |
| C13 | -3.071718 | 3.591116  | -1.351822 |
| C14 | -2.376856 | 2.329861  | -1.287318 |
| C15 | -2.349981 | -0.114034 | -0.935994 |
| C16 | -3.013729 | -1.374594 | -0.661925 |
| C17 | -2.041682 | -2.328397 | -0.652053 |
| C18 | -0.802534 | -1.639586 | -0.963845 |
| C19 | 1.608837  | -1.667715 | -1.507824 |
| C20 | 2.823560  | -2.398045 | -1.763089 |
| C21 | 3.784745  | -1.483983 | -2.078475 |
| C22 | 3.142041  | -0.177683 | -1.982893 |
| C23 | 3.102488  | 2.307001  | -2.060688 |
| C24 | 3.782941  | 3.569198  | -2.236190 |
| C25 | 2.822352  | 4.532665  | -2.296705 |
| C26 | 1.556628  | 3.858892  | -2.145953 |
| C27 | 0.316342  | 4.474064  | -2.124244 |
| H28 | 0.281237  | 5.544161  | -2.285160 |
| C29 | -2.992756 | 1.112638  | -1.035508 |
| H30 | -4.067883 | 1.124446  | -0.923386 |
| C31 | 0.408081  | -2.278946 | -1.166890 |
| H32 | 0.441475  | -3.350066 | -1.030549 |
| C33 | 3.743836  | 1.071351  | -2.089382 |
| H34 | 4.819323  | 1.119927  | -2.175283 |
| C35 | 1.302299  | 2.221924  | 2.700396  |
| H36 | 0.978025  | 1.413262  | 3.343466  |
| C37 | 0.530488  | 2.501462  | 1.521834  |
| H38 | -0.517931 | 2.221892  | 1.549703  |
| C39 | 0.853159  | 3.737764  | 0.870349  |
| H40 | 0.161397  | 4.118480  | 0.144540  |
| C41 | 2.006574  | 4.434709  | 1.132101  |
| H42 | 2.275583  | 5.317807  | 0.564005  |
| C43 | 2.808511  | 4.053272  | 2.210544  |
| O44 | 3.907230  | 4.803040  | 2.469937  |
| C45 | 4.601720  | 4.757749  | 3.684888  |
| O46 | 5.493897  | 5.562163  | 3.810254  |
| C47 | 4.143819  | 3.774102  | 4.639285  |
| C48 | 3.152813  | 2.878008  | 4.310041  |
| O49 | 2.823212  | 1.947640  | 5.206861  |
| H50 | 2.015178  | 1.482098  | 4.995343  |
| C51 | 2.425092  | 2.983543  | 3.048286  |
| H52 | -0.513924 | 2.514314  | -5.502510 |
| H53 | -2.249259 | 5.605998  | -1.661904 |
| H54 | -4.137028 | 3.737138  | -1.195727 |
| H55 | -4.086210 | -1.477125 | -0.512946 |
| H56 | -2.052115 | -3.404756 | -0.440804 |
| H57 | 2.885286  | -3.482603 | -1.772778 |
| H58 | 4.791726  | -1.790336 | -2.374302 |
| H59 | 4.862858  | 3.656649  | -2.301303 |
| H60 | 2.904639  | 5.600480  | -2.448191 |
| H61 | 4.386167  | 3.959999  | 5.712310  |

Warfarin 6-2 Transition State Quartet

|     |           |          |           |
|-----|-----------|----------|-----------|
| C1  | -0.928982 | 1.815915 | -4.750771 |
| H2  | -1.646861 | 1.164679 | -5.261251 |
| H3  | -1.491359 | 2.407585 | -4.028900 |
| S4  | 0.249299  | 0.723480 | -3.875530 |
| O5  | 0.713117  | 1.333697 | 0.254592  |
| Fe6 | 0.421324  | 1.091057 | -1.441308 |
| N7  | -1.035949 | 2.487863 | -1.567541 |

|     |           |           |           |
|-----|-----------|-----------|-----------|
| N8  | -0.999684 | -0.319437 | -1.119746 |
| N9  | 1.808725  | -0.337261 | -1.668109 |
| N10 | 1.777427  | 2.494502  | -1.948021 |
| C11 | -0.874226 | 3.828051  | -1.812328 |
| C12 | -2.122655 | 4.515750  | -1.646652 |
| C13 | -3.064054 | 3.569202  | -1.371276 |
| C14 | -2.375729 | 2.305726  | -1.327374 |
| C15 | -2.346956 | -0.127479 | -0.958566 |
| C16 | -3.007990 | -1.386886 | -0.673017 |
| C17 | -2.037078 | -2.342082 | -0.659460 |
| C18 | -0.796036 | -1.660804 | -0.978704 |
| C19 | 1.600240  | -1.682648 | -1.523414 |
| C20 | 2.818294  | -2.400098 | -1.778005 |
| C21 | 3.778247  | -1.485564 | -2.090483 |
| C22 | 3.143628  | -0.180163 | -1.997401 |
| C23 | 3.119862  | 2.294174  | -2.051346 |
| C24 | 3.795672  | 3.560593  | -2.227316 |
| C25 | 2.830932  | 4.519709  | -2.278539 |
| C26 | 1.567346  | 3.840161  | -2.120858 |
| C27 | 0.329767  | 4.456062  | -2.109492 |
| H28 | 0.297708  | 5.528455  | -2.254532 |
| C29 | -2.992963 | 1.089367  | -1.069253 |
| H30 | -4.067823 | 1.103009  | -0.955264 |
| C31 | 0.410939  | -2.300806 | -1.181207 |
| H32 | 0.449444  | -3.371220 | -1.040684 |
| C33 | 3.756727  | 1.059863  | -2.096957 |
| H34 | 4.831978  | 1.100698  | -2.184762 |
| C35 | 1.292724  | 2.243380  | 2.714062  |
| H36 | 0.962812  | 1.435250  | 3.354327  |
| C37 | 0.499758  | 2.550338  | 1.556725  |
| H38 | -0.545783 | 2.276656  | 1.597308  |
| C39 | 0.829868  | 3.794774  | 0.914453  |
| H40 | 0.136128  | 4.178298  | 0.191444  |
| C41 | 1.990827  | 4.472274  | 1.170668  |
| H42 | 2.262346  | 5.361308  | 0.613468  |
| C43 | 2.808286  | 4.070527  | 2.235566  |
| O44 | 3.909066  | 4.816301  | 2.491981  |
| C45 | 4.612288  | 4.757374  | 3.701424  |
| O46 | 5.504374  | 5.561977  | 3.831244  |
| C47 | 4.160056  | 3.764177  | 4.646525  |
| C48 | 3.163958  | 2.871927  | 4.313331  |
| O49 | 2.835967  | 1.937650  | 5.207576  |
| H50 | 2.023523  | 1.478097  | 5.001975  |
| C51 | 2.429143  | 2.990508  | 3.056511  |
| H52 | -0.525695 | 2.510943  | -5.523572 |
| H53 | -2.240058 | 5.587335  | -1.659998 |
| H54 | -4.127892 | 3.721445  | -1.203971 |
| H55 | -4.080346 | -1.487095 | -0.517755 |
| H56 | -2.047983 | -3.416063 | -0.441483 |
| H57 | 2.887162  | -3.484607 | -1.782534 |
| H58 | 4.789694  | -1.792846 | -2.378047 |
| H59 | 4.874229  | 3.651231  | -2.299449 |
| H60 | 2.908613  | 5.589064  | -2.435668 |
| H61 | 4.400623  | 3.946029  | 5.720832  |

Warfarin 6-3Reactant Complex Doublet

|    |           |          |           |
|----|-----------|----------|-----------|
| C1 | -1.025371 | 1.783309 | -4.808321 |
| H2 | -1.618817 | 1.231172 | -5.548813 |
| H3 | -1.722901 | 2.220361 | -4.094228 |

|     |           |           |           |
|-----|-----------|-----------|-----------|
| S4  | 0.025333  | 0.540879  | -3.992741 |
| O5  | 0.704254  | 1.153062  | 0.001699  |
| Fe6 | 0.328062  | 1.012570  | -1.590987 |
| N7  | -1.114550 | 2.418871  | -1.627277 |
| N8  | -1.072097 | -0.389769 | -1.243014 |
| N9  | 1.736708  | -0.410293 | -1.873372 |
| N10 | 1.694435  | 2.426651  | -2.126515 |
| C11 | -0.935628 | 3.769140  | -1.759169 |
| C12 | -2.178049 | 4.467888  | -1.568580 |
| C13 | -3.130198 | 3.518571  | -1.360012 |
| C14 | -2.452801 | 2.243766  | -1.389999 |
| C15 | -2.407938 | -0.200363 | -1.051434 |
| C16 | -3.056137 | -1.452211 | -0.717022 |
| C17 | -2.080921 | -2.403395 | -0.706033 |
| C18 | -0.852929 | -1.719414 | -1.068910 |
| C19 | 1.551902  | -1.740255 | -1.654145 |
| C20 | 2.780777  | -2.456632 | -1.868257 |
| C21 | 3.724184  | -1.543294 | -2.228993 |
| C22 | 3.065271  | -0.245976 | -2.188462 |
| C23 | 3.043345  | 2.235312  | -2.233824 |
| C24 | 3.721899  | 3.508349  | -2.343974 |
| C25 | 2.758376  | 4.473091  | -2.332732 |
| C26 | 1.500226  | 3.783129  | -2.172384 |
| C27 | 0.272033  | 4.401942  | -2.011355 |
| H28 | 0.249707  | 5.483820  | -2.026255 |
| C29 | -3.064129 | 1.018055  | -1.154608 |
| H30 | -4.138572 | 1.024226  | -1.023991 |
| C31 | 0.368190  | -2.350442 | -1.261060 |
| H32 | 0.428043  | -3.412714 | -1.064744 |
| C33 | 3.677341  | 0.998356  | -2.280937 |
| H34 | 4.755781  | 1.032489  | -2.345458 |
| C35 | 1.090889  | 2.517586  | 3.170060  |
| H36 | 0.741889  | 1.761343  | 3.864744  |
| C37 | 0.227626  | 2.977443  | 2.194712  |
| H38 | -0.757853 | 2.546727  | 2.093742  |
| C39 | 0.651806  | 3.957328  | 1.286938  |
| H40 | -0.033764 | 4.304717  | 0.527968  |
| C41 | 1.932816  | 4.481426  | 1.353585  |
| H42 | 2.279896  | 5.235215  | 0.657479  |
| C43 | 2.782594  | 4.052959  | 2.373727  |
| O44 | 3.996117  | 4.664818  | 2.484766  |
| C45 | 4.751273  | 4.633608  | 3.657316  |
| O46 | 5.676645  | 5.413859  | 3.710638  |
| C47 | 4.327151  | 3.680027  | 4.658051  |
| C48 | 3.253844  | 2.849556  | 4.423623  |
| O49 | 2.965777  | 1.912609  | 5.333835  |
| H50 | 2.091281  | 1.541762  | 5.231424  |
| C51 | 2.383598  | 3.069299  | 3.287917  |
| H52 | -0.543945 | 2.611911  | -5.361045 |
| H53 | -2.286450 | 5.544950  | -1.559632 |
| H54 | -4.189496 | 3.676940  | -1.179760 |
| H55 | -4.119373 | -1.520269 | -0.509104 |
| H56 | -2.071654 | -3.468542 | -0.465766 |
| H57 | 2.855652  | -3.534746 | -1.800353 |
| H58 | 4.734453  | -1.829334 | -2.524271 |
| H59 | 4.802839  | 3.615020  | -2.373807 |
| H60 | 2.848320  | 5.552737  | -2.452107 |
| H61 | 4.587842  | 3.883676  | 5.715771  |

Warfarin 6-3Reactant Complex Quartet



|     |           |           |           |
|-----|-----------|-----------|-----------|
| C1  | -1.022706 | 1.783305  | -4.806706 |
| H2  | -1.615252 | 1.230327  | -5.547443 |
| H3  | -1.719715 | 2.218243  | -4.090995 |
| S4  | 0.027571  | 0.541245  | -3.995087 |
| O5  | 0.667542  | 1.130713  | 0.005053  |
| Fe6 | 0.333013  | 1.009516  | -1.591713 |
| N7  | -1.113502 | 2.418179  | -1.628232 |
| N8  | -1.074058 | -0.394335 | -1.255935 |
| N9  | 1.735434  | -0.409921 | -1.879887 |
| N10 | 1.694500  | 2.422846  | -2.121821 |
| C11 | -0.936078 | 3.767802  | -1.760892 |
| C12 | -2.179201 | 4.466056  | -1.571514 |
| C13 | -3.130502 | 3.516711  | -1.361633 |
| C14 | -2.452756 | 2.241598  | -1.390493 |
| C15 | -2.408077 | -0.202770 | -1.059696 |
| C16 | -3.056362 | -1.453655 | -0.720611 |
| C17 | -2.080979 | -2.405114 | -0.707130 |
| C18 | -0.853286 | -1.722898 | -1.073954 |
| C19 | 1.549400  | -1.740750 | -1.661285 |
| C20 | 2.778443  | -2.455784 | -1.873956 |
| C21 | 3.722613  | -1.542685 | -2.230540 |
| C22 | 3.066216  | -0.245714 | -2.188881 |
| C23 | 3.043970  | 2.233221  | -2.228603 |
| C24 | 3.720281  | 3.507124  | -2.342851 |
| C25 | 2.755444  | 4.470892  | -2.335147 |
| C26 | 1.497626  | 3.781144  | -2.172995 |
| C27 | 0.271532  | 4.399694  | -2.016397 |
| H28 | 0.248379  | 5.481765  | -2.041439 |
| C29 | -3.063376 | 1.016944  | -1.158285 |
| H30 | -4.137264 | 1.024274  | -1.023351 |
| C31 | 0.368131  | -2.351234 | -1.262082 |
| H32 | 0.433181  | -3.411179 | -1.054403 |
| C33 | 3.679299  | 0.998414  | -2.270863 |
| H34 | 4.759171  | 1.032855  | -2.322245 |
| C35 | 1.098435  | 2.510449  | 3.157955  |
| H36 | 0.755041  | 1.744494  | 3.844793  |
| C37 | 0.232323  | 2.976984  | 2.189223  |
| H38 | -0.752110 | 2.542887  | 2.085639  |
| C39 | 0.656710  | 3.955761  | 1.281071  |
| H40 | -0.028098 | 4.304829  | 0.522494  |
| C41 | 1.938468  | 4.478474  | 1.345421  |
| H42 | 2.284077  | 5.233326  | 0.648662  |
| C43 | 2.786872  | 4.052294  | 2.367055  |
| O44 | 3.995499  | 4.674837  | 2.485501  |
| C45 | 4.751345  | 4.635238  | 3.657243  |
| O46 | 5.678760  | 5.414087  | 3.714271  |
| C47 | 4.327549  | 3.678592  | 4.654258  |
| C48 | 3.256910  | 2.845680  | 4.413987  |
| O49 | 2.968542  | 1.905932  | 5.323197  |
| H50 | 2.089609  | 1.543712  | 5.225259  |
| C51 | 2.391110  | 3.064971  | 3.276969  |
| H52 | -0.543349 | 2.611849  | -5.361084 |
| H53 | -2.287752 | 5.543673  | -1.561466 |
| H54 | -4.190063 | 3.675664  | -1.180314 |
| H55 | -4.119783 | -1.520323 | -0.511577 |
| H56 | -2.071973 | -3.469418 | -0.464417 |
| H57 | 2.851611  | -3.533733 | -1.803768 |
| H58 | 4.734040  | -1.827525 | -2.524570 |
| H59 | 4.800658  | 3.613551  | -2.374876 |

|     |          |          |           |
|-----|----------|----------|-----------|
| H60 | 2.845077 | 5.550712 | -2.454062 |
| H61 | 4.585885 | 3.881586 | 5.713429  |

Warfarin 6-3 Transition State Doublet

|     |           |           |           |
|-----|-----------|-----------|-----------|
| C1  | -0.979362 | 1.777666  | -4.679895 |
| H2  | -1.561395 | 1.155738  | -5.372126 |
| H3  | -1.684173 | 2.234434  | -3.985555 |
| S4  | 0.118454  | 0.609768  | -3.794383 |
| O5  | 0.880194  | 1.207240  | 0.266317  |
| Fe6 | 0.362054  | 1.116049  | -1.432342 |
| N7  | -1.078966 | 2.491670  | -1.482418 |
| N8  | -1.033789 | -0.315392 | -1.065353 |
| N9  | 1.779383  | -0.339434 | -1.670415 |
| N10 | 1.699253  | 2.508442  | -1.990663 |
| C11 | -0.936153 | 3.832531  | -1.741787 |
| C12 | -2.191128 | 4.513302  | -1.581676 |
| C13 | -3.125448 | 3.559985  | -1.316625 |
| C14 | -2.425562 | 2.299871  | -1.263426 |
| C15 | -2.376829 | -0.141107 | -0.910801 |
| C16 | -3.032824 | -1.406432 | -0.643810 |
| C17 | -2.055904 | -2.356126 | -0.643279 |
| C18 | -0.820463 | -1.656582 | -0.945492 |
| C19 | 1.584120  | -1.672918 | -1.504197 |
| C20 | 2.799353  | -2.397673 | -1.781313 |
| C21 | 3.740477  | -1.482923 | -2.138981 |
| C22 | 3.093290  | -0.178579 | -2.034882 |
| C23 | 3.045094  | 2.304325  | -2.109983 |
| C24 | 3.721342  | 3.567171  | -2.287936 |
| C25 | 2.759281  | 4.533835  | -2.323025 |
| C26 | 1.497779  | 3.858700  | -2.140481 |
| C27 | 0.254949  | 4.468508  | -2.061432 |
| H28 | 0.205072  | 5.543519  | -2.163790 |
| C29 | -3.033260 | 1.078012  | -1.021193 |
| H30 | -4.111114 | 1.078797  | -0.930459 |
| C31 | 0.393605  | -2.289604 | -1.150021 |
| H32 | 0.436576  | -3.361388 | -1.014286 |
| C33 | 3.689228  | 1.070037  | -2.153031 |
| H34 | 4.762759  | 1.116978  | -2.269675 |
| C35 | 1.330104  | 2.127771  | 2.681215  |
| H36 | 1.040791  | 1.299038  | 3.312236  |
| C37 | 0.520996  | 2.433698  | 1.533969  |
| H38 | -0.523500 | 2.136703  | 1.572901  |
| C39 | 0.805325  | 3.691077  | 0.908167  |
| H40 | 0.085278  | 4.081616  | 0.213857  |
| C41 | 1.962793  | 4.388423  | 1.148255  |
| H42 | 2.206932  | 5.292009  | 0.600881  |
| C43 | 2.808966  | 3.973458  | 2.180740  |
| O44 | 3.921452  | 4.705985  | 2.409908  |
| C45 | 4.680393  | 4.622116  | 3.585306  |
| O46 | 5.593066  | 5.406441  | 3.673446  |
| C47 | 4.236188  | 3.641383  | 4.552835  |
| C48 | 3.209229  | 2.776133  | 4.256672  |
| O49 | 2.862665  | 1.866246  | 5.172305  |
| H50 | 1.974107  | 1.529804  | 5.052926  |
| C51 | 2.456211  | 2.886515  | 3.009692  |
| H52 | -0.538396 | 2.590074  | -5.299664 |
| H53 | -2.303558 | 5.585982  | -1.580024 |
| H54 | -4.191220 | 3.701935  | -1.161226 |
| H55 | -4.103543 | -1.494093 | -0.482942 |

|     |           |           |           |
|-----|-----------|-----------|-----------|
| H56 | -2.053339 | -3.432267 | -0.438680 |
| H57 | 2.858962  | -3.481004 | -1.769147 |
| H58 | 4.733315  | -1.781261 | -2.479984 |
| H59 | 4.802976  | 3.652883  | -2.345453 |
| H60 | 2.855426  | 5.606390  | -2.455986 |
| H61 | 4.502395  | 3.832219  | 5.618713  |

Warfarin 6-3 Transition State Quartet

|     |           |           |           |
|-----|-----------|-----------|-----------|
| C1  | -0.996472 | 1.772530  | -4.693944 |
| H2  | -1.566413 | 1.144403  | -5.389360 |
| H3  | -1.711689 | 2.221987  | -4.004668 |
| S4  | 0.108601  | 0.623285  | -3.801551 |
| O5  | 0.710709  | 1.328237  | 0.248658  |
| Fe6 | 0.383120  | 1.069191  | -1.453042 |
| N7  | -1.084657 | 2.461766  | -1.554714 |
| N8  | -1.018512 | -0.344059 | -1.092998 |
| N9  | 1.773301  | -0.345212 | -1.686899 |
| N10 | 1.726628  | 2.486337  | -1.985940 |
| C11 | -0.925307 | 3.805014  | -1.772963 |
| C12 | -2.177271 | 4.489019  | -1.597777 |
| C13 | -3.116049 | 3.534679  | -1.345505 |
| C14 | -2.422310 | 2.271281  | -1.319695 |
| C15 | -2.367003 | -0.158489 | -0.941837 |
| C16 | -3.021109 | -1.420573 | -0.658102 |
| C17 | -2.048284 | -2.372279 | -0.650853 |
| C18 | -0.809334 | -1.683262 | -0.961352 |
| C19 | 1.579372  | -1.689834 | -1.520204 |
| C20 | 2.796584  | -2.400328 | -1.796935 |
| C21 | 3.735262  | -1.482410 | -2.157465 |
| C22 | 3.095668  | -0.181315 | -2.055436 |
| C23 | 3.067536  | 2.290869  | -2.109183 |
| C24 | 3.737346  | 3.558931  | -2.282225 |
| C25 | 2.769588  | 4.518528  | -2.310626 |
| C26 | 1.511077  | 3.833808  | -2.128040 |
| C27 | 0.270587  | 4.444847  | -2.060092 |
| H28 | 0.226307  | 5.521735  | -2.140410 |
| C29 | -3.028881 | 1.049584  | -1.063749 |
| H30 | -4.105056 | 1.048558  | -0.958810 |
| C31 | 0.403842  | -2.317705 | -1.160161 |
| H32 | 0.456718  | -3.386882 | -1.014109 |
| C33 | 3.708421  | 1.057140  | -2.165990 |
| H34 | 4.781838  | 1.092864  | -2.276143 |
| C35 | 1.306187  | 2.159238  | 2.697785  |
| H36 | 1.008987  | 1.333218  | 3.325566  |
| C37 | 0.467447  | 2.498073  | 1.577152  |
| H38 | -0.571987 | 2.211004  | 1.644307  |
| C39 | 0.761451  | 3.767242  | 0.958851  |
| H40 | 0.034270  | 4.165163  | 0.275076  |
| C41 | 1.933305  | 4.432420  | 1.180495  |
| H42 | 2.185549  | 5.336949  | 0.639384  |
| C43 | 2.799080  | 3.993406  | 2.194647  |
| O44 | 3.917715  | 4.714653  | 2.414807  |
| C45 | 4.682902  | 4.624463  | 3.587989  |
| O46 | 5.599174  | 5.405434  | 3.673619  |
| C47 | 4.238961  | 3.643800  | 4.553075  |
| C48 | 3.208753  | 2.780881  | 4.255672  |
| O49 | 2.862218  | 1.867798  | 5.169515  |
| H50 | 1.976308  | 1.530901  | 5.051243  |
| C51 | 2.449155  | 2.900887  | 3.014715  |

|     |           |           |           |
|-----|-----------|-----------|-----------|
| H52 | -0.548829 | 2.586925  | -5.306152 |
| H53 | -2.293005 | 5.563273  | -1.583837 |
| H54 | -4.179858 | 3.681534  | -1.173836 |
| H55 | -4.091159 | -1.504202 | -0.487991 |
| H56 | -2.047286 | -3.446768 | -0.439346 |
| H57 | 2.863365  | -3.483935 | -1.781053 |
| H58 | 4.731800  | -1.778712 | -2.493270 |
| H59 | 4.817706  | 3.648362  | -2.342928 |
| H60 | 2.859621  | 5.593048  | -2.445064 |
| H61 | 4.506701  | 3.832136  | 5.620997  |

Warfarin 6-4 Reactant Complex Doublet

|     |           |           |           |
|-----|-----------|-----------|-----------|
| C1  | -0.784448 | 1.969480  | -4.895931 |
| H2  | -1.412567 | 1.385306  | -5.580587 |
| H3  | -1.448922 | 2.487001  | -4.204676 |
| S4  | 0.200539  | 0.725503  | -4.012876 |
| O5  | 0.748643  | 1.095759  | 0.023335  |
| Fe6 | 0.372778  | 1.032956  | -1.570701 |
| N7  | -1.064444 | 2.452795  | -1.607330 |
| N8  | -1.044465 | -0.365846 | -1.255417 |
| N9  | 1.767024  | -0.401072 | -1.863366 |
| N10 | 1.748879  | 2.436558  | -2.063240 |
| C11 | -0.887219 | 3.800215  | -1.778003 |
| C12 | -2.132668 | 4.502470  | -1.611673 |
| C13 | -3.082914 | 3.557110  | -1.373387 |
| C14 | -2.405609 | 2.282046  | -1.371397 |
| C15 | -2.372502 | -0.161858 | -1.028309 |
| C16 | -3.025170 | -1.402648 | -0.664908 |
| C17 | -2.057218 | -2.362908 | -0.656221 |
| C18 | -0.831679 | -1.694605 | -1.052563 |
| C19 | 1.571281  | -1.728795 | -1.636315 |
| C20 | 2.799721  | -2.452540 | -1.822614 |
| C21 | 3.755658  | -1.543899 | -2.166449 |
| C22 | 3.103309  | -0.243058 | -2.144760 |
| C23 | 3.098010  | 2.238659  | -2.171443 |
| C24 | 3.778587  | 3.510706  | -2.290978 |
| C25 | 2.816618  | 4.475300  | -2.288922 |
| C26 | 1.555523  | 3.792486  | -2.133912 |
| C27 | 0.327709  | 4.422377  | -2.028165 |
| H28 | 0.312274  | 5.501820  | -2.104353 |
| C29 | -3.020013 | 1.062804  | -1.120560 |
| H30 | -4.090895 | 1.074411  | -0.971057 |
| C31 | 0.386503  | -2.332205 | -1.237866 |
| H32 | 0.448370  | -3.386239 | -1.005290 |
| C33 | 3.725312  | 0.999007  | -2.222867 |
| H34 | 4.804447  | 1.028548  | -2.268536 |
| C35 | 1.042031  | 2.506754  | 3.135108  |
| H36 | 0.748411  | 1.690735  | 3.783901  |
| C37 | 0.157158  | 2.941521  | 2.167064  |
| H38 | -0.786950 | 2.433491  | 2.030250  |
| C39 | 0.524842  | 3.971270  | 1.291549  |
| H40 | -0.169495 | 4.291342  | 0.528523  |
| C41 | 1.765703  | 4.582995  | 1.396190  |
| H42 | 2.067598  | 5.378169  | 0.726555  |
| C43 | 2.618481  | 4.198741  | 2.430491  |
| O44 | 3.768578  | 4.916240  | 2.603899  |
| C45 | 4.482934  | 4.911966  | 3.801219  |
| O46 | 5.336280  | 5.766183  | 3.911943  |
| C47 | 4.116609  | 3.893586  | 4.753974  |

|     |           |           |           |
|-----|-----------|-----------|-----------|
| C48 | 3.138109  | 2.972474  | 4.455788  |
| O49 | 2.915480  | 1.980822  | 5.323435  |
| H50 | 2.125901  | 1.480505  | 5.134321  |
| C51 | 2.284046  | 3.156617  | 3.302194  |
| H52 | -0.301052 | 2.730791  | -5.544667 |
| H53 | -2.254599 | 5.580509  | -1.629324 |
| H54 | -4.142063 | 3.722999  | -1.189786 |
| H55 | -4.088946 | -1.456253 | -0.453053 |
| H56 | -2.057499 | -3.431089 | -0.412511 |
| H57 | 2.864120  | -3.532052 | -1.768808 |
| H58 | 4.765790  | -1.839724 | -2.442139 |
| H59 | 4.857377  | 3.618256  | -2.340228 |
| H60 | 2.888814  | 5.549773  | -2.433529 |
| H61 | 4.342908  | 4.077615  | 5.821421  |

Warfarin 6-4 Reactant Complex Quartet

|     |           |           |           |
|-----|-----------|-----------|-----------|
| C1  | -0.782825 | 1.968577  | -4.900097 |
| H2  | -1.406129 | 1.379954  | -5.585038 |
| H3  | -1.452299 | 2.484069  | -4.211028 |
| S4  | 0.206565  | 0.729925  | -4.017358 |
| O5  | 0.693888  | 1.088817  | 0.031028  |
| Fe6 | 0.379389  | 1.025524  | -1.569725 |
| N7  | -1.064680 | 2.445364  | -1.616596 |
| N8  | -1.042311 | -0.377980 | -1.268855 |
| N9  | 1.772067  | -0.404707 | -1.857328 |
| N10 | 1.751103  | 2.428890  | -2.057728 |
| C11 | -0.887655 | 3.792494  | -1.777400 |
| C12 | -2.132791 | 4.493661  | -1.606398 |
| C13 | -3.082371 | 3.547670  | -1.371643 |
| C14 | -2.405408 | 2.271498  | -1.377807 |
| C15 | -2.368980 | -0.173157 | -1.040424 |
| C16 | -3.020078 | -1.413041 | -0.672002 |
| C17 | -2.052927 | -2.372717 | -0.660038 |
| C18 | -0.827062 | -1.705576 | -1.058581 |
| C19 | 1.575572  | -1.734569 | -1.638356 |
| C20 | 2.804158  | -2.456318 | -1.833165 |
| C21 | 3.758223  | -1.547534 | -2.173412 |
| C22 | 3.108596  | -0.246686 | -2.142773 |
| C23 | 3.100162  | 2.232643  | -2.167945 |
| C24 | 3.778590  | 3.505760  | -2.290040 |
| C25 | 2.815651  | 4.468971  | -2.287109 |
| C26 | 1.554451  | 3.786045  | -2.129990 |
| C27 | 0.329144  | 4.415123  | -2.023677 |
| H28 | 0.314785  | 5.495931  | -2.095983 |
| C29 | -3.018129 | 1.052327  | -1.131873 |
| H30 | -4.089406 | 1.061735  | -0.981162 |
| C31 | 0.391666  | -2.340347 | -1.242035 |
| H32 | 0.454664  | -3.395561 | -1.013879 |
| C33 | 3.729215  | 0.995799  | -2.218411 |
| H34 | 4.808744  | 1.026344  | -2.267653 |
| C35 | 1.037515  | 2.513098  | 3.143319  |
| H36 | 0.741419  | 1.699154  | 3.794888  |
| C37 | 0.152004  | 2.948410  | 2.177201  |
| H38 | -0.788224 | 2.437357  | 2.036678  |
| C39 | 0.521009  | 3.977701  | 1.300109  |
| H40 | -0.174766 | 4.295435  | 0.536101  |
| C41 | 1.760108  | 4.587100  | 1.402121  |
| H42 | 2.063920  | 5.381417  | 0.730964  |
| C43 | 2.616527  | 4.201307  | 2.432639  |

|     |           |           |           |
|-----|-----------|-----------|-----------|
| O44 | 3.766652  | 4.915966  | 2.602471  |
| C45 | 4.482485  | 4.910642  | 3.797596  |
| O46 | 5.338666  | 5.764985  | 3.907440  |
| C47 | 4.117744  | 3.892910  | 4.752044  |
| C48 | 3.137173  | 2.972167  | 4.457320  |
| O49 | 2.915899  | 1.984435  | 5.326180  |
| H50 | 2.125585  | 1.479724  | 5.136864  |
| C51 | 2.281479  | 3.158133  | 3.305874  |
| H52 | -0.300009 | 2.730478  | -5.548436 |
| H53 | -2.255026 | 5.572245  | -1.622631 |
| H54 | -4.141192 | 3.712153  | -1.186798 |
| H55 | -4.083105 | -1.464110 | -0.455104 |
| H56 | -2.051411 | -3.439760 | -0.413327 |
| H57 | 2.868841  | -3.536851 | -1.780002 |
| H58 | 4.771329  | -1.840233 | -2.451285 |
| H59 | 4.857650  | 3.613114  | -2.340108 |
| H60 | 2.887903  | 5.543649  | -2.431514 |
| H61 | 4.345804  | 4.076412  | 5.818763  |

Warfarin 6-4 Transition State Doublet

|     |           |           |           |
|-----|-----------|-----------|-----------|
| C1  | -0.750244 | 1.947879  | -4.793163 |
| H2  | -1.359849 | 1.301841  | -5.436383 |
| H3  | -1.432025 | 2.478683  | -4.128153 |
| S4  | 0.275906  | 0.772024  | -3.840518 |
| O5  | 0.858859  | 1.257286  | 0.296736  |
| Fe6 | 0.395550  | 1.143504  | -1.401353 |
| N7  | -1.045319 | 2.523222  | -1.496982 |
| N8  | -1.008749 | -0.288168 | -1.066073 |
| N9  | 1.807369  | -0.324826 | -1.636325 |
| N10 | 1.745469  | 2.515790  | -1.947843 |
| C11 | -0.897264 | 3.860261  | -1.773503 |
| C12 | -2.151906 | 4.545841  | -1.623591 |
| C13 | -3.086578 | 3.597870  | -1.335149 |
| C14 | -2.390324 | 2.337071  | -1.267259 |
| C15 | -2.348091 | -0.103016 | -0.889031 |
| C16 | -3.006782 | -1.360036 | -0.594659 |
| C17 | -2.036538 | -2.317289 | -0.590941 |
| C18 | -0.801490 | -1.628800 | -0.918300 |
| C19 | 1.602282  | -1.659655 | -1.474335 |
| C20 | 2.812574  | -2.393555 | -1.741476 |
| C21 | 3.765522  | -1.483482 | -2.085141 |
| C22 | 3.126486  | -0.175617 | -1.987679 |
| C23 | 3.093430  | 2.305854  | -2.063116 |
| C24 | 3.772308  | 3.567363  | -2.242838 |
| C25 | 2.812952  | 4.533875  | -2.276866 |
| C26 | 1.547610  | 3.865195  | -2.104709 |
| C27 | 0.308319  | 4.484609  | -2.073094 |
| H28 | 0.276261  | 5.556892  | -2.218460 |
| C29 | -2.998605 | 1.118757  | -1.002200 |
| H30 | -4.074660 | 1.120675  | -0.893774 |
| C31 | 0.409565  | -2.270014 | -1.120918 |
| H32 | 0.449881  | -3.339295 | -0.970588 |
| C33 | 3.731468  | 1.070646  | -2.106344 |
| H34 | 4.805727  | 1.112204  | -2.217608 |
| C35 | 1.233000  | 2.190965  | 2.719833  |
| H36 | 0.968053  | 1.354175  | 3.347482  |
| C37 | 0.422828  | 2.462284  | 1.565558  |
| H38 | -0.599017 | 2.103251  | 1.586714  |
| C39 | 0.646020  | 3.742793  | 0.958010  |

|     |           |           |           |
|-----|-----------|-----------|-----------|
| H40 | -0.089448 | 4.109925  | 0.267964  |
| C41 | 1.767167  | 4.493200  | 1.216102  |
| H42 | 1.969310  | 5.413520  | 0.681579  |
| C43 | 2.622189  | 4.115167  | 2.254593  |
| O44 | 3.683001  | 4.919790  | 2.517696  |
| C45 | 4.398562  | 4.881923  | 3.717674  |
| O46 | 5.243969  | 5.738853  | 3.852615  |
| C47 | 4.017976  | 3.848689  | 4.649090  |
| C48 | 3.074792  | 2.904785  | 4.310364  |
| O49 | 2.809049  | 1.940203  | 5.194031  |
| H50 | 2.023345  | 1.436225  | 4.987375  |
| C51 | 2.324763  | 2.999245  | 3.063771  |
| H52 | -0.297445 | 2.699860  | -5.490586 |
| H53 | -2.275712 | 5.618021  | -1.645536 |
| H54 | -4.150754 | 3.745147  | -1.168913 |
| H55 | -4.076756 | -1.439568 | -0.430251 |
| H56 | -2.038590 | -3.396579 | -0.386133 |
| H57 | 2.865312  | -3.479209 | -1.747962 |
| H58 | 4.758812  | -1.792982 | -2.410505 |
| H59 | 4.852417  | 3.650904  | -2.317000 |
| H60 | 2.891221  | 5.598968  | -2.435885 |
| H61 | 4.261592  | 4.023739  | 5.722059  |

Warfarin 6-4 Transition State Quartet

|     |           |           |           |
|-----|-----------|-----------|-----------|
| C1  | -0.754609 | 1.944254  | -4.825337 |
| H2  | -1.357968 | 1.295947  | -5.471896 |
| H3  | -1.441687 | 2.473719  | -4.164080 |
| S4  | 0.270162  | 0.780521  | -3.862763 |
| O5  | 0.701350  | 1.337980  | 0.279738  |
| Fe6 | 0.415943  | 1.101066  | -1.407029 |
| N7  | -1.050645 | 2.491251  | -1.555782 |
| N8  | -0.999582 | -0.318572 | -1.092896 |
| N9  | 1.798301  | -0.335478 | -1.651236 |
| N10 | 1.765594  | 2.490478  | -1.933517 |
| C11 | -0.890599 | 3.832978  | -1.791671 |
| C12 | -2.142382 | 4.519762  | -1.631842 |
| C13 | -3.081222 | 3.570310  | -1.356497 |
| C14 | -2.389868 | 2.306087  | -1.313997 |
| C15 | -2.344031 | -0.124474 | -0.917373 |
| C16 | -3.001549 | -1.379277 | -0.608773 |
| C17 | -2.033451 | -2.337510 | -0.600357 |
| C18 | -0.796157 | -1.657971 | -0.935426 |
| C19 | 1.594225  | -1.681547 | -1.491881 |
| C20 | 2.807383  | -2.402899 | -1.760076 |
| C21 | 3.758599  | -1.490448 | -2.101934 |
| C22 | 3.125878  | -0.184733 | -2.004803 |
| C23 | 3.107413  | 2.287844  | -2.058977 |
| C24 | 3.781527  | 3.552892  | -2.237582 |
| C25 | 2.817922  | 4.514501  | -2.262220 |
| C26 | 1.555888  | 3.839023  | -2.084816 |
| C27 | 0.319576  | 4.459853  | -2.058771 |
| H28 | 0.292628  | 5.534218  | -2.181516 |
| C29 | -2.997803 | 1.087562  | -1.040164 |
| H30 | -4.071662 | 1.090697  | -0.922955 |
| C31 | 0.412932  | -2.299493 | -1.135314 |
| H32 | 0.458813  | -3.367478 | -0.980628 |
| C33 | 3.742495  | 1.052165  | -2.115885 |
| H34 | 4.815755  | 1.086238  | -2.226390 |
| C35 | 1.214075  | 2.208726  | 2.747373  |

|     |           |           |           |
|-----|-----------|-----------|-----------|
| H36 | 0.932417  | 1.387535  | 3.387162  |
| C37 | 0.386670  | 2.500910  | 1.616064  |
| H38 | -0.636542 | 2.147938  | 1.661340  |
| C39 | 0.613554  | 3.782621  | 1.010384  |
| H40 | -0.129484 | 4.152716  | 0.326953  |
| C41 | 1.743992  | 4.514588  | 1.254481  |
| H42 | 1.944819  | 5.441647  | 0.727883  |
| C43 | 2.617896  | 4.120982  | 2.276708  |
| O44 | 3.681258  | 4.926248  | 2.534699  |
| C45 | 4.406736  | 4.877973  | 3.727194  |
| O46 | 5.256103  | 5.730664  | 3.860700  |
| C47 | 4.029873  | 3.841212  | 4.655934  |
| C48 | 3.083202  | 2.899146  | 4.317656  |
| O49 | 2.820480  | 1.933498  | 5.204517  |
| H50 | 2.028100  | 1.436025  | 5.008725  |
| C51 | 2.326836  | 3.001005  | 3.076011  |
| H52 | -0.298907 | 2.696484  | -5.519698 |
| H53 | -2.268994 | 5.594046  | -1.644728 |
| H54 | -4.142823 | 3.723852  | -1.175051 |
| H55 | -4.071410 | -1.452928 | -0.435146 |
| H56 | -2.038848 | -3.415024 | -0.387418 |
| H57 | 2.866613  | -3.488506 | -1.761699 |
| H58 | 4.757704  | -1.795690 | -2.420623 |
| H59 | 4.860066  | 3.640382  | -2.316369 |
| H60 | 2.892156  | 5.581432  | -2.422411 |
| H61 | 4.273583  | 4.015138  | 5.729493  |

Warfarin 6-5 Reactant Complex Doublet

|     |           |           |           |
|-----|-----------|-----------|-----------|
| C1  | -0.948323 | 2.080025  | -4.925399 |
| H2  | -1.670769 | 1.571698  | -5.575570 |
| H3  | -1.528128 | 2.622586  | -4.179422 |
| S4  | 0.024950  | 0.748849  | -4.137106 |
| O5  | 0.654334  | 1.147803  | -0.072497 |
| Fe6 | 0.306204  | 1.043490  | -1.671840 |
| N7  | -1.113692 | 2.467776  | -1.686040 |
| N8  | -1.113067 | -0.352953 | -1.349248 |
| N9  | 1.698397  | -0.399279 | -1.956548 |
| N10 | 1.695717  | 2.437608  | -2.169979 |
| C11 | -0.923428 | 3.814890  | -1.832896 |
| C12 | -2.159202 | 4.525462  | -1.648860 |
| C13 | -3.117305 | 3.586086  | -1.415010 |
| C14 | -2.452268 | 2.304928  | -1.438795 |
| C15 | -2.443274 | -0.146907 | -1.134704 |
| C16 | -3.098276 | -1.388640 | -0.772970 |
| C17 | -2.126562 | -2.344455 | -0.735586 |
| C18 | -0.898767 | -1.678885 | -1.127740 |
| C19 | 1.506475  | -1.722885 | -1.702747 |
| C20 | 2.735506  | -2.449592 | -1.871884 |
| C21 | 3.691882  | -1.547500 | -2.228001 |
| C22 | 3.038071  | -0.247043 | -2.235530 |
| C23 | 3.043578  | 2.234607  | -2.276621 |
| C24 | 3.733605  | 3.503212  | -2.380398 |
| C25 | 2.778607  | 4.473401  | -2.362457 |
| C26 | 1.513510  | 3.796089  | -2.218553 |
| C27 | 0.292497  | 4.433511  | -2.090724 |
| H28 | 0.287216  | 5.514909  | -2.154543 |
| C29 | -3.077642 | 1.086178  | -1.203422 |
| H30 | -4.144801 | 1.111668  | -1.028088 |
| C31 | 0.320780  | -2.317787 | -1.291324 |



|     |           |           |           |
|-----|-----------|-----------|-----------|
| H32 | 0.377911  | -3.368646 | -1.045307 |
| C33 | 3.664762  | 0.991534  | -2.322358 |
| H34 | 4.744189  | 1.015608  | -2.366923 |
| C35 | 1.039180  | 2.487104  | 3.276995  |
| H36 | 0.640845  | 1.761747  | 3.980495  |
| C37 | 0.257807  | 2.881078  | 2.207397  |
| H38 | -0.709568 | 2.428443  | 2.041515  |
| C39 | 0.741484  | 3.825460  | 1.290498  |
| H40 | 0.121771  | 4.115969  | 0.454766  |
| C41 | 1.999235  | 4.384847  | 1.446705  |
| H42 | 2.389389  | 5.115563  | 0.746700  |
| C43 | 2.765861  | 4.020016  | 2.553450  |
| O44 | 3.956141  | 4.662435  | 2.739504  |
| C45 | 4.585636  | 4.718468  | 3.980405  |
| O46 | 5.483796  | 5.522421  | 4.079498  |
| C47 | 4.088827  | 3.814813  | 4.996822  |
| C48 | 3.076950  | 2.927961  | 4.699393  |
| O49 | 2.732762  | 2.035752  | 5.629999  |
| H50 | 1.962930  | 1.518312  | 5.398244  |
| C51 | 2.310887  | 3.067966  | 3.476729  |
| H52 | -0.443195 | 2.831498  | -5.576419 |
| H53 | -2.251748 | 5.603364  | -1.665186 |
| H54 | -4.174212 | 3.748628  | -1.226461 |
| H55 | -4.166035 | -1.469206 | -0.594605 |
| H56 | -2.128972 | -3.403216 | -0.457435 |
| H57 | 2.808422  | -3.527745 | -1.783263 |
| H58 | 4.708423  | -1.846596 | -2.482144 |
| H59 | 4.812913  | 3.610257  | -2.425618 |
| H60 | 2.859895  | 5.550330  | -2.473677 |
| H61 | 4.200197  | 4.117116  | 6.062504  |

Warfarin 6-5 Reactant Complex Quartet

|     |           |           |           |
|-----|-----------|-----------|-----------|
| C1  | -0.940828 | 2.079858  | -4.919410 |
| H2  | -1.662708 | 1.563969  | -5.565080 |
| H3  | -1.520424 | 2.620599  | -4.172589 |
| S4  | 0.041333  | 0.760028  | -4.127718 |
| O5  | 0.635634  | 1.101325  | -0.064350 |
| Fe6 | 0.315221  | 1.041374  | -1.665405 |
| N7  | -1.109076 | 2.469741  | -1.678325 |
| N8  | -1.112510 | -0.354293 | -1.353682 |
| N9  | 1.702887  | -0.395440 | -1.953782 |
| N10 | 1.697957  | 2.440497  | -2.152289 |
| C11 | -0.923229 | 3.815406  | -1.830975 |
| C12 | -2.160548 | 4.524917  | -1.650651 |
| C13 | -3.117101 | 3.584886  | -1.415799 |
| C14 | -2.449985 | 2.304081  | -1.435059 |
| C15 | -2.439741 | -0.147084 | -1.131586 |
| C16 | -3.092947 | -1.387225 | -0.760695 |
| C17 | -2.121460 | -2.342644 | -0.723931 |
| C18 | -0.895082 | -1.678848 | -1.124504 |
| C19 | 1.509265  | -1.718873 | -1.699113 |
| C20 | 2.740450  | -2.443204 | -1.860986 |
| C21 | 3.697022  | -1.542706 | -2.213198 |
| C22 | 3.045255  | -0.241248 | -2.223418 |
| C23 | 3.044820  | 2.239430  | -2.261390 |
| C24 | 3.733012  | 3.508599  | -2.370257 |
| C25 | 2.777252  | 4.478248  | -2.356131 |
| C26 | 1.512755  | 3.800361  | -2.209740 |
| C27 | 0.291877  | 4.436989  | -2.090841 |

|     |           |           |           |
|-----|-----------|-----------|-----------|
| H28 | 0.283525  | 5.516995  | -2.160278 |
| C29 | -3.074917 | 1.087603  | -1.201343 |
| H30 | -4.140762 | 1.114571  | -1.021435 |
| C31 | 0.323808  | -2.314847 | -1.288297 |
| H32 | 0.385244  | -3.363228 | -1.032480 |
| C33 | 3.669621  | 0.997675  | -2.306029 |
| H34 | 4.748993  | 1.027600  | -2.343614 |
| C35 | 1.045871  | 2.471353  | 3.250749  |
| H36 | 0.661368  | 1.725681  | 3.939813  |
| C37 | 0.261428  | 2.872103  | 2.187206  |
| H38 | -0.697970 | 2.406050  | 2.009999  |
| C39 | 0.742839  | 3.820781  | 1.273941  |
| H40 | 0.126891  | 4.107533  | 0.433382  |
| C41 | 1.996876  | 4.389943  | 1.434628  |
| H42 | 2.383952  | 5.124304  | 0.740251  |
| C43 | 2.760122  | 4.026858  | 2.544121  |
| O44 | 3.949190  | 4.673241  | 2.734128  |
| C45 | 4.583831  | 4.717219  | 3.972573  |
| O46 | 5.481658  | 5.520180  | 4.076122  |
| C47 | 4.088914  | 3.806094  | 4.981765  |
| C48 | 3.074531  | 2.920814  | 4.680450  |
| O49 | 2.732324  | 2.023682  | 5.606196  |
| H50 | 1.950296  | 1.521842  | 5.381525  |
| C51 | 2.310573  | 3.066486  | 3.459907  |
| H52 | -0.441294 | 2.830602  | -5.575372 |
| H53 | -2.253646 | 5.603502  | -1.665774 |
| H54 | -4.174742 | 3.746243  | -1.225963 |
| H55 | -4.161481 | -1.469004 | -0.583922 |
| H56 | -2.121763 | -3.402170 | -0.448099 |
| H57 | 2.810497  | -3.522505 | -1.781365 |
| H58 | 4.711312  | -1.843561 | -2.472272 |
| H59 | 4.812387  | 3.615147  | -2.418938 |
| H60 | 2.858590  | 5.555393  | -2.471902 |
| H61 | 4.201551  | 4.101420  | 6.047856  |

Warfarin 6-5 Transition State Doublet

|     |           |           |           |
|-----|-----------|-----------|-----------|
| C1  | -0.906413 | 2.062874  | -4.808980 |
| H2  | -1.606709 | 1.480752  | -5.420084 |
| H3  | -1.507205 | 2.627010  | -4.095499 |
| S4  | 0.121073  | 0.815766  | -3.927560 |
| O5  | 0.801395  | 1.227102  | 0.289520  |
| Fe6 | 0.357324  | 1.151562  | -1.424381 |
| N7  | -1.070951 | 2.537835  | -1.503192 |
| N8  | -1.057099 | -0.278849 | -1.112976 |
| N9  | 1.752446  | -0.323695 | -1.698314 |
| N10 | 1.709122  | 2.518973  | -1.980663 |
| C11 | -0.918972 | 3.872629  | -1.780807 |
| C12 | -2.171799 | 4.561013  | -1.650826 |
| C13 | -3.111517 | 3.617765  | -1.368452 |
| C14 | -2.419485 | 2.354962  | -1.290082 |
| C15 | -2.397856 | -0.091252 | -0.948755 |
| C16 | -3.062885 | -1.349552 | -0.666597 |
| C17 | -2.090152 | -2.305332 | -0.643334 |
| C18 | -0.852187 | -1.619885 | -0.962487 |
| C19 | 1.551212  | -1.657072 | -1.518303 |
| C20 | 2.762382  | -2.392324 | -1.773232 |
| C21 | 3.715686  | -1.484028 | -2.126814 |
| C22 | 3.073998  | -0.176444 | -2.046252 |
| C23 | 3.053914  | 2.305922  | -2.115084 |

|     |           |           |           |
|-----|-----------|-----------|-----------|
| C24 | 3.737100  | 3.564149  | -2.304990 |
| C25 | 2.781033  | 4.534739  | -2.330448 |
| C26 | 1.517356  | 3.870316  | -2.142288 |
| C27 | 0.283899  | 4.494904  | -2.094673 |
| H28 | 0.254345  | 5.566369  | -2.246150 |
| C29 | -3.037580 | 1.136977  | -1.043696 |
| H30 | -4.112866 | 1.150270  | -0.928187 |
| C31 | 0.358119  | -2.263749 | -1.153606 |
| H32 | 0.394512  | -3.331298 | -0.991986 |
| C33 | 3.685169  | 1.065905  | -2.164405 |
| H34 | 4.758791  | 1.102479  | -2.278932 |
| C35 | 1.199567  | 2.173619  | 2.774159  |
| H36 | 0.830737  | 1.391628  | 3.424143  |
| C37 | 0.472188  | 2.459125  | 1.566931  |
| H38 | -0.579518 | 2.189382  | 1.562051  |
| C39 | 0.826966  | 3.688385  | 0.923068  |
| H40 | 0.160974  | 4.071010  | 0.173278  |
| C41 | 1.977533  | 4.372712  | 1.221883  |
| H42 | 2.265843  | 5.263227  | 0.673317  |
| C43 | 2.744348  | 3.978303  | 2.322019  |
| O44 | 3.845167  | 4.715444  | 2.606907  |
| C45 | 4.484669  | 4.694370  | 3.847389  |
| O46 | 5.383968  | 5.488188  | 3.986497  |
| C47 | 3.964798  | 3.753837  | 4.818073  |
| C48 | 2.984876  | 2.851873  | 4.463734  |
| O49 | 2.599065  | 1.965954  | 5.384204  |
| H50 | 1.799032  | 1.491521  | 5.161859  |
| C51 | 2.323718  | 2.921968  | 3.158763  |
| H52 | -0.438078 | 2.800147  | -5.517062 |
| H53 | -2.269075 | 5.634742  | -1.676986 |
| H54 | -4.176124 | 3.760660  | -1.207391 |
| H55 | -4.137669 | -1.447476 | -0.539405 |
| H56 | -2.098271 | -3.377973 | -0.411997 |
| H57 | 2.822005  | -3.476964 | -1.757696 |
| H58 | 4.713716  | -1.793789 | -2.441406 |
| H59 | 4.815465  | 3.652500  | -2.386490 |
| H60 | 2.865158  | 5.603551  | -2.469637 |
| H61 | 4.119420  | 4.016940  | 5.898725  |

Warfarin 6-5 Transition State Quartet

|     |           |           |           |
|-----|-----------|-----------|-----------|
| C1  | -0.921001 | 2.073839  | -4.802320 |
| H2  | -1.616076 | 1.489158  | -5.415654 |
| H3  | -1.527912 | 2.636059  | -4.091914 |
| S4  | 0.107867  | 0.835585  | -3.915946 |
| O5  | 0.688260  | 1.330635  | 0.245762  |
| Fe6 | 0.372518  | 1.113659  | -1.452531 |
| N7  | -1.076263 | 2.520048  | -1.555016 |
| N8  | -1.049332 | -0.295101 | -1.131506 |
| N9  | 1.742050  | -0.324016 | -1.712718 |
| N10 | 1.732765  | 2.504436  | -1.979220 |
| C11 | -0.910356 | 3.857171  | -1.807158 |
| C12 | -2.159471 | 4.549778  | -1.659075 |
| C13 | -3.102457 | 3.607584  | -1.377677 |
| C14 | -2.416780 | 2.341090  | -1.321373 |
| C15 | -2.394372 | -0.096613 | -0.965790 |
| C16 | -3.058513 | -1.353681 | -0.673350 |
| C17 | -2.090472 | -2.310570 | -0.646006 |
| C18 | -0.849056 | -1.635019 | -0.970393 |
| C19 | 1.539611  | -1.665920 | -1.525091 |

|     |           |           |           |
|-----|-----------|-----------|-----------|
| C20 | 2.754288  | -2.390797 | -1.774608 |
| C21 | 3.706224  | -1.483626 | -2.131201 |
| C22 | 3.073404  | -0.176068 | -2.059431 |
| C23 | 3.072120  | 2.297132  | -2.114254 |
| C24 | 3.750276  | 3.560784  | -2.300090 |
| C25 | 2.790127  | 4.524413  | -2.324871 |
| C26 | 1.527698  | 3.852222  | -2.139744 |
| C27 | 0.295291  | 4.478822  | -2.107569 |
| H28 | 0.271167  | 5.550550  | -2.256043 |
| C29 | -3.036201 | 1.124540  | -1.062263 |
| H30 | -4.108072 | 1.140305  | -0.927856 |
| C31 | 0.359656  | -2.278964 | -1.155827 |
| H32 | 0.403627  | -3.343922 | -0.982111 |
| C33 | 3.698031  | 1.055903  | -2.173983 |
| H34 | 4.772264  | 1.080806  | -2.284832 |
| C35 | 1.200391  | 2.189112  | 2.773665  |
| H36 | 0.832380  | 1.402813  | 3.417969  |
| C37 | 0.450166  | 2.500126  | 1.588035  |
| H38 | -0.597231 | 2.227998  | 1.597951  |
| C39 | 0.811793  | 3.736399  | 0.948805  |
| H40 | 0.143715  | 4.120195  | 0.200639  |
| C41 | 1.972514  | 4.397790  | 1.235917  |
| H42 | 2.270284  | 5.284329  | 0.687476  |
| C43 | 2.752317  | 3.987720  | 2.325915  |
| O44 | 3.860827  | 4.714900  | 2.606040  |
| C45 | 4.499716  | 4.690869  | 3.848624  |
| O46 | 5.399925  | 5.483422  | 3.988397  |
| C47 | 3.975562  | 3.753681  | 4.817088  |
| C48 | 2.989628  | 2.854434  | 4.459178  |
| O49 | 2.592878  | 1.976693  | 5.380682  |
| H50 | 1.789383  | 1.507296  | 5.152389  |
| C51 | 2.332298  | 2.927569  | 3.154605  |
| H52 | -0.443985 | 2.809834  | -5.507384 |
| H53 | -2.260974 | 5.624987  | -1.679746 |
| H54 | -4.167201 | 3.755695  | -1.210188 |
| H55 | -4.134191 | -1.449535 | -0.546571 |
| H56 | -2.099082 | -3.383341 | -0.412187 |
| H57 | 2.816167  | -3.475921 | -1.754406 |
| H58 | 4.703650  | -1.797788 | -2.440473 |
| H59 | 4.827550  | 3.652546  | -2.386019 |
| H60 | 2.866959  | 5.595809  | -2.463767 |
| H61 | 4.124977  | 4.017793  | 5.899152  |

Warfarin 6-6 Reactant Complex Doublet

|     |           |           |           |
|-----|-----------|-----------|-----------|
| C1  | -0.962989 | 2.044764  | -4.822785 |
| H2  | -1.746223 | 1.545463  | -5.404638 |
| H3  | -1.468042 | 2.634821  | -4.060098 |
| S4  | 0.029322  | 0.714761  | -4.062691 |
| O5  | 0.687144  | 1.067908  | -0.013728 |
| Fe6 | 0.328222  | 1.002249  | -1.612336 |
| N7  | -1.090945 | 2.429762  | -1.603809 |
| N8  | -1.094846 | -0.394510 | -1.313467 |
| N9  | 1.715847  | -0.435518 | -1.928536 |
| N10 | 1.718283  | 2.407172  | -2.085565 |
| C11 | -0.903564 | 3.775131  | -1.753707 |
| C12 | -2.140967 | 4.481484  | -1.572245 |
| C13 | -3.100412 | 3.541448  | -1.350578 |
| C14 | -2.431798 | 2.262892  | -1.369122 |
| C15 | -2.423863 | -0.190217 | -1.096462 |

|     |           |           |           |
|-----|-----------|-----------|-----------|
| C16 | -3.083708 | -1.435604 | -0.767863 |
| C17 | -2.117136 | -2.397084 | -0.760686 |
| C18 | -0.887986 | -1.726619 | -1.136370 |
| C19 | 1.515879  | -1.766437 | -1.719047 |
| C20 | 2.746033  | -2.489448 | -1.897974 |
| C21 | 3.708293  | -1.580410 | -2.214096 |
| C22 | 3.058045  | -0.277390 | -2.188721 |
| C23 | 3.066653  | 2.207724  | -2.165510 |
| C24 | 3.754993  | 3.481010  | -2.253867 |
| C25 | 2.796546  | 4.447975  | -2.270676 |
| C26 | 1.532077  | 3.765019  | -2.143301 |
| C27 | 0.309727  | 4.397112  | -2.020411 |
| H28 | 0.301328  | 5.478189  | -2.086255 |
| C29 | -3.057590 | 1.044701  | -1.149818 |
| H30 | -4.125513 | 1.070256  | -0.984331 |
| C31 | 0.327493  | -2.368221 | -1.331590 |
| H32 | 0.377419  | -3.427892 | -1.123949 |
| C33 | 3.685697  | 0.962324  | -2.226507 |
| H34 | 4.765504  | 0.983605  | -2.252341 |
| C35 | 1.035188  | 2.433582  | 3.143000  |
| H36 | 0.675957  | 1.653422  | 3.804561  |
| C37 | 0.191685  | 2.912584  | 2.159389  |
| H38 | -0.787920 | 2.480685  | 2.028278  |
| C39 | 0.631558  | 3.916713  | 1.286564  |
| H40 | -0.041418 | 4.288000  | 0.527662  |
| C41 | 1.912662  | 4.432783  | 1.385831  |
| H42 | 2.274430  | 5.199513  | 0.710267  |
| C43 | 2.745712  | 3.976057  | 2.407153  |
| O44 | 3.967282  | 4.560840  | 2.533382  |
| C45 | 4.732994  | 4.480535  | 3.701133  |
| O46 | 5.711541  | 5.185937  | 3.740709  |
| C47 | 4.242321  | 3.569815  | 4.717678  |
| C48 | 3.152245  | 2.769574  | 4.472228  |
| O49 | 2.806195  | 1.867796  | 5.398443  |
| H50 | 1.931788  | 1.508262  | 5.265065  |
| C51 | 2.322273  | 2.987040  | 3.304791  |
| H52 | -0.470562 | 2.747277  | -5.527843 |
| H53 | -2.242942 | 5.555959  | -1.590697 |
| H54 | -4.162127 | 3.707554  | -1.190211 |
| H55 | -4.151274 | -1.511395 | -0.589910 |
| H56 | -2.124330 | -3.462593 | -0.516674 |
| H57 | 2.820631  | -3.567998 | -1.826156 |
| H58 | 4.729457  | -1.880666 | -2.453672 |
| H59 | 4.833166  | 3.605049  | -2.266322 |
| H60 | 2.880327  | 5.526275  | -2.405741 |
| H61 | 4.483653  | 3.792173  | 5.778287  |

Warfarin 6-6 Reactant Complex Quartet

|     |           |           |           |
|-----|-----------|-----------|-----------|
| C1  | -0.955526 | 2.047253  | -4.818034 |
| H2  | -1.736669 | 1.541173  | -5.397801 |
| H3  | -1.462346 | 2.635062  | -4.055402 |
| S4  | 0.042520  | 0.725034  | -4.056952 |
| O5  | 0.655338  | 1.042495  | -0.009333 |
| Fe6 | 0.333763  | 1.000650  | -1.608794 |
| N7  | -1.089310 | 2.431692  | -1.602603 |
| N8  | -1.098167 | -0.396477 | -1.320525 |
| N9  | 1.716691  | -0.433740 | -1.923554 |
| N10 | 1.719048  | 2.405769  | -2.073981 |
| C11 | -0.905004 | 3.775093  | -1.753988 |

|     |           |           |           |
|-----|-----------|-----------|-----------|
| C12 | -2.142159 | 4.481526  | -1.574400 |
| C13 | -3.101234 | 3.541647  | -1.352787 |
| C14 | -2.432121 | 2.263264  | -1.369858 |
| C15 | -2.424245 | -0.189914 | -1.101013 |
| C16 | -3.084815 | -1.434559 | -0.767487 |
| C17 | -2.119727 | -2.395929 | -0.757174 |
| C18 | -0.889349 | -1.728141 | -1.135715 |
| C19 | 1.515159  | -1.763239 | -1.715131 |
| C20 | 2.744015  | -2.487415 | -1.892465 |
| C21 | 3.707885  | -1.580274 | -2.205225 |
| C22 | 3.061573  | -0.276137 | -2.178940 |
| C23 | 3.066001  | 2.207880  | -2.155764 |
| C24 | 3.752845  | 3.480890  | -2.250788 |
| C25 | 2.794592  | 4.447235  | -2.270500 |
| C26 | 1.530122  | 3.765783  | -2.139526 |
| C27 | 0.309875  | 4.397847  | -2.022981 |
| H28 | 0.299096  | 5.478550  | -2.095142 |
| C29 | -3.057831 | 1.046340  | -1.154572 |
| H30 | -4.125630 | 1.072872  | -0.988673 |
| C31 | 0.324741  | -2.366869 | -1.326603 |
| H32 | 0.379072  | -3.424369 | -1.111894 |
| C33 | 3.688535  | 0.962923  | -2.213311 |
| H34 | 4.768529  | 0.987324  | -2.236891 |
| C35 | 1.043192  | 2.428389  | 3.138044  |
| H36 | 0.689139  | 1.640230  | 3.792018  |
| C37 | 0.199128  | 2.908071  | 2.155044  |
| H38 | -0.773360 | 2.465224  | 2.013532  |
| C39 | 0.641967  | 3.907436  | 1.277922  |
| H40 | -0.027359 | 4.269124  | 0.510788  |
| C41 | 1.920814  | 4.426279  | 1.378942  |
| H42 | 2.282667  | 5.190928  | 0.702532  |
| C43 | 2.751897  | 3.975915  | 2.406198  |
| O44 | 3.970193  | 4.564287  | 2.536811  |
| C45 | 4.736356  | 4.480996  | 3.704195  |
| O46 | 5.717224  | 5.182562  | 3.744426  |
| C47 | 4.241703  | 3.570069  | 4.720301  |
| C48 | 3.155272  | 2.770505  | 4.472528  |
| O49 | 2.806432  | 1.866275  | 5.396462  |
| H50 | 1.929372  | 1.511612  | 5.261277  |
| C51 | 2.327489  | 2.986315  | 3.303974  |
| H52 | -0.467541 | 2.749129  | -5.526642 |
| H53 | -2.243692 | 5.556333  | -1.591573 |
| H54 | -4.163047 | 3.706996  | -1.190739 |
| H55 | -4.152799 | -1.510085 | -0.588142 |
| H56 | -2.128397 | -3.462106 | -0.511839 |
| H57 | 2.816705  | -3.567178 | -1.824730 |
| H58 | 4.727028  | -1.883819 | -2.446612 |
| H59 | 4.831185  | 3.603209  | -2.265671 |
| H60 | 2.878900  | 5.525275  | -2.406991 |
| H61 | 4.481652  | 3.793577  | 5.781216  |

Warfarin 6-6 Transition State Doublet

|     |           |          |           |
|-----|-----------|----------|-----------|
| C1  | -0.932331 | 2.022873 | -4.717774 |
| H2  | -1.695327 | 1.459208 | -5.265472 |
| H3  | -1.457381 | 2.631657 | -3.983742 |
| S4  | 0.113196  | 0.766782 | -3.879226 |
| O5  | 0.826750  | 1.165649 | 0.273388  |
| Fe6 | 0.357083  | 1.109963 | -1.437276 |
| N7  | -1.064940 | 2.501432 | -1.470674 |

|     |           |           |           |
|-----|-----------|-----------|-----------|
| N8  | -1.055766 | -0.319244 | -1.115110 |
| N9  | 1.756051  | -0.361848 | -1.701906 |
| N10 | 1.717057  | 2.489425  | -1.949599 |
| C11 | -0.911142 | 3.838140  | -1.736890 |
| C12 | -2.160111 | 4.525813  | -1.582802 |
| C13 | -3.102506 | 3.581876  | -1.308883 |
| C14 | -2.412451 | 2.318285  | -1.249354 |
| C15 | -2.393888 | -0.131130 | -0.940353 |
| C16 | -3.060490 | -1.391507 | -0.679205 |
| C17 | -2.091191 | -2.350685 | -0.680427 |
| C18 | -0.853410 | -1.662067 | -0.992751 |
| C19 | 1.549526  | -1.696718 | -1.550180 |
| C20 | 2.764277  | -2.428869 | -1.801238 |
| C21 | 3.724044  | -1.517075 | -2.118834 |
| C22 | 3.082401  | -0.208865 | -2.024138 |
| C23 | 3.063741  | 2.277921  | -2.046928 |
| C24 | 3.749681  | 3.541298  | -2.204332 |
| C25 | 2.792500  | 4.509938  | -2.257425 |
| C26 | 1.525357  | 3.841029  | -2.103329 |
| C27 | 0.290258  | 4.462965  | -2.056830 |
| H28 | 0.260344  | 5.535798  | -2.197526 |
| C29 | -3.031404 | 1.100216  | -1.013531 |
| H30 | -4.105238 | 1.116954  | -0.888991 |
| C31 | 0.352815  | -2.306538 | -1.202848 |
| H32 | 0.385612  | -3.377174 | -1.065512 |
| C33 | 3.694460  | 1.036992  | -2.101956 |
| H34 | 4.769759  | 1.071342  | -2.191963 |
| C35 | 1.232150  | 2.073282  | 2.706778  |
| H36 | 0.916391  | 1.254941  | 3.335969  |
| C37 | 0.448596  | 2.387170  | 1.540525  |
| H38 | -0.595510 | 2.094214  | 1.558821  |
| C39 | 0.748004  | 3.654200  | 0.936736  |
| H40 | 0.036774  | 4.062212  | 0.243718  |
| C41 | 1.906706  | 4.339293  | 1.199507  |
| H42 | 2.163436  | 5.249365  | 0.670415  |
| C43 | 2.743209  | 3.898938  | 2.229927  |
| O44 | 3.873162  | 4.600198  | 2.460393  |
| C45 | 4.640332  | 4.480288  | 3.632643  |
| O46 | 5.597288  | 5.202759  | 3.703585  |
| C47 | 4.143258  | 3.535876  | 4.613622  |
| C48 | 3.099379  | 2.695558  | 4.313347  |
| O49 | 2.718834  | 1.803472  | 5.232928  |
| H50 | 1.850637  | 1.440135  | 5.067708  |
| C51 | 2.364188  | 2.816135  | 3.054842  |
| H52 | -0.473264 | 2.713966  | -5.468695 |
| H53 | -2.264969 | 5.595025  | -1.607568 |
| H54 | -4.169450 | 3.731008  | -1.167202 |
| H55 | -4.133782 | -1.486326 | -0.551130 |
| H56 | -2.099403 | -3.427557 | -0.476745 |
| H57 | 2.826030  | -3.513885 | -1.795581 |
| H58 | 4.727941  | -1.830882 | -2.409793 |
| H59 | 4.829498  | 3.644574  | -2.247729 |
| H60 | 2.883698  | 5.579127  | -2.409948 |
| H61 | 4.398310  | 3.738982  | 5.682686  |

Warfarin 6-6 Transition State Quartet

|    |           |          |           |
|----|-----------|----------|-----------|
| C1 | -0.952702 | 2.016462 | -4.724095 |
| H2 | -1.705857 | 1.443092 | -5.273583 |
| H3 | -1.488258 | 2.622282 | -3.994630 |

|     |           |           |           |
|-----|-----------|-----------|-----------|
| S4  | 0.107099  | 0.781516  | -3.876841 |
| O5  | 0.685575  | 1.275442  | 0.250481  |
| Fe6 | 0.380448  | 1.065764  | -1.455903 |
| N7  | -1.068370 | 2.471324  | -1.528659 |
| N8  | -1.038075 | -0.346074 | -1.139363 |
| N9  | 1.753701  | -0.365730 | -1.719799 |
| N10 | 1.744664  | 2.469619  | -1.937932 |
| C11 | -0.900230 | 3.811716  | -1.759234 |
| C12 | -2.146856 | 4.500948  | -1.592699 |
| C13 | -3.093184 | 3.555916  | -1.329690 |
| C14 | -2.408377 | 2.289568  | -1.293589 |
| C15 | -2.382097 | -0.147809 | -0.964191 |
| C16 | -3.045294 | -1.407038 | -0.688773 |
| C17 | -2.080171 | -2.366934 | -0.685995 |
| C18 | -0.838122 | -1.688797 | -1.007871 |
| C19 | 1.547350  | -1.711999 | -1.568069 |
| C20 | 2.765343  | -2.429593 | -1.819547 |
| C21 | 3.723120  | -1.516333 | -2.136876 |
| C22 | 3.089809  | -0.209619 | -2.043454 |
| C23 | 3.086415  | 2.265463  | -2.042905 |
| C24 | 3.764289  | 3.534812  | -2.198677 |
| C25 | 2.801347  | 4.496516  | -2.244283 |
| C26 | 1.537707  | 3.817433  | -2.086616 |
| C27 | 0.303797  | 4.439572  | -2.050379 |
| H28 | 0.276709  | 5.514354  | -2.172162 |
| C29 | -3.025437 | 1.071231  | -1.044621 |
| H30 | -4.096585 | 1.086662  | -0.904119 |
| C31 | 0.364980  | -2.331497 | -1.215007 |
| H32 | 0.406910  | -3.401332 | -1.069450 |
| C33 | 3.714343  | 1.026339  | -2.113039 |
| H34 | 4.789772  | 1.050921  | -2.201710 |
| C35 | 1.212129  | 2.099419  | 2.725607  |
| H36 | 0.889278  | 1.282994  | 3.353746  |
| C37 | 0.406916  | 2.438178  | 1.582232  |
| H38 | -0.634144 | 2.146777  | 1.619838  |
| C39 | 0.709575  | 3.713908  | 0.983634  |
| H40 | -0.005701 | 4.123386  | 0.296269  |
| C41 | 1.878768  | 4.375162  | 1.233337  |
| H42 | 2.140356  | 5.286538  | 0.708486  |
| C43 | 2.731467  | 3.916769  | 2.248953  |
| O44 | 3.864106  | 4.612785  | 2.472581  |
| C45 | 4.638712  | 4.484822  | 3.640253  |
| O46 | 5.598330  | 5.203279  | 3.708824  |
| C47 | 4.143969  | 3.537557  | 4.618963  |
| C48 | 3.099105  | 2.697715  | 4.316926  |
| O49 | 2.724375  | 1.800289  | 5.234591  |
| H50 | 1.854311  | 1.436828  | 5.074590  |
| C51 | 2.357044  | 2.827222  | 3.064105  |
| H52 | -0.487013 | 2.707809  | -5.471748 |
| H53 | -2.254510 | 5.572311  | -1.607087 |
| H54 | -4.158930 | 3.710751  | -1.176148 |
| H55 | -4.119536 | -1.497143 | -0.554363 |
| H56 | -2.092179 | -3.442269 | -0.476473 |
| H57 | 2.831104  | -3.514851 | -1.808098 |
| H58 | 4.729037  | -1.830610 | -2.422579 |
| H59 | 4.842425  | 3.642527  | -2.249270 |
| H60 | 2.886705  | 5.567826  | -2.399706 |
| H61 | 4.400807  | 3.737319  | 5.688315  |

Warfarin 6-7 Reactant Complex Doublet



|     |           |           |           |
|-----|-----------|-----------|-----------|
| C1  | -0.857302 | 2.027099  | -4.796507 |
| H2  | -1.587665 | 1.474683  | -5.394570 |
| H3  | -1.414926 | 2.599924  | -4.058684 |
| S4  | 0.163651  | 0.752849  | -3.987929 |
| O5  | 0.667834  | 1.089308  | 0.060874  |
| Fe6 | 0.336131  | 1.035744  | -1.541013 |
| N7  | -1.098738 | 2.451134  | -1.568739 |
| N8  | -1.081981 | -0.367527 | -1.251223 |
| N9  | 1.741336  | -0.392627 | -1.826370 |
| N10 | 1.719666  | 2.447560  | -1.997220 |
| C11 | -0.921347 | 3.796387  | -1.735276 |
| C12 | -2.164449 | 4.498904  | -1.569986 |
| C13 | -3.116762 | 3.556402  | -1.334348 |
| C14 | -2.440576 | 2.280755  | -1.333035 |
| C15 | -2.409146 | -0.167163 | -1.027149 |
| C16 | -3.064011 | -1.412131 | -0.686866 |
| C17 | -2.094905 | -2.369493 | -0.671966 |
| C18 | -0.867725 | -1.697751 | -1.058391 |
| C19 | 1.540044  | -1.723520 | -1.631608 |
| C20 | 2.770305  | -2.443851 | -1.813673 |
| C21 | 3.735846  | -1.531968 | -2.116260 |
| C22 | 3.085043  | -0.229126 | -2.075951 |
| C23 | 3.070104  | 2.255944  | -2.072952 |
| C24 | 3.746684  | 3.532605  | -2.191728 |
| C25 | 2.780418  | 4.490655  | -2.230174 |
| C26 | 1.520867  | 3.801787  | -2.086356 |
| C27 | 0.291343  | 4.423941  | -1.988741 |
| H28 | 0.270919  | 5.504285  | -2.066038 |
| C29 | -3.054850 | 1.061770  | -1.090183 |
| H30 | -4.122300 | 1.074608  | -0.911991 |
| C31 | 0.349389  | -2.331313 | -1.249686 |
| H32 | 0.404967  | -3.390319 | -1.038008 |
| C33 | 3.701594  | 1.017596  | -2.113433 |
| H34 | 4.781661  | 1.054416  | -2.126633 |
| C35 | 0.938039  | 2.481373  | 3.281022  |
| H36 | 0.595209  | 1.710702  | 3.966670  |
| C37 | 0.106821  | 2.889253  | 2.258133  |
| H38 | -0.839349 | 2.396605  | 2.097985  |
| C39 | 0.535233  | 3.865255  | 1.348563  |
| H40 | -0.126999 | 4.168658  | 0.549481  |
| C41 | 1.788437  | 4.439786  | 1.460382  |
| H42 | 2.139796  | 5.192892  | 0.762884  |
| C43 | 2.608024  | 4.061251  | 2.523381  |
| O44 | 3.800875  | 4.706819  | 2.660995  |
| C45 | 4.542538  | 4.678772  | 3.841118  |
| O46 | 5.467909  | 5.458484  | 3.899556  |
| C47 | 4.109182  | 3.730669  | 4.841608  |
| C48 | 3.043383  | 2.890326  | 4.602361  |
| O49 | 2.751675  | 1.962104  | 5.514827  |
| H50 | 1.894876  | 1.555329  | 5.388439  |
| C51 | 2.202514  | 3.084041  | 3.442975  |
| H52 | -0.394696 | 2.738453  | -5.510690 |
| H53 | -2.267223 | 5.576315  | -1.582487 |
| H54 | -4.179557 | 3.715662  | -1.168543 |
| H55 | -4.137157 | -1.473542 | -0.534037 |
| H56 | -2.097042 | -3.435704 | -0.422756 |
| H57 | 2.838923  | -3.523130 | -1.750126 |
| H58 | 4.756311  | -1.831182 | -2.365125 |
| H59 | 4.824357  | 3.660782  | -2.214031 |

|     |          |          |           |
|-----|----------|----------|-----------|
| H60 | 2.853722 | 5.564681 | -2.395786 |
| H61 | 4.377369 | 3.921452 | 5.896249  |

Warfarin 6-7 Reactant Complex Quartet

|     |           |           |           |
|-----|-----------|-----------|-----------|
| C1  | -0.854470 | 2.030912  | -4.799709 |
| H2  | -1.585863 | 1.473589  | -5.393820 |
| H3  | -1.411735 | 2.603256  | -4.061096 |
| S4  | 0.174993  | 0.763427  | -3.993763 |
| O5  | 0.625780  | 1.085858  | 0.068075  |
| Fe6 | 0.344330  | 1.030205  | -1.536927 |
| N7  | -1.096266 | 2.446198  | -1.572767 |
| N8  | -1.080049 | -0.375678 | -1.262502 |
| N9  | 1.745413  | -0.396641 | -1.824848 |
| N10 | 1.724528  | 2.439877  | -1.989950 |
| C11 | -0.920223 | 3.789806  | -1.731926 |
| C12 | -2.162469 | 4.492814  | -1.565814 |
| C13 | -3.115634 | 3.549415  | -1.333801 |
| C14 | -2.439473 | 2.273262  | -1.336419 |
| C15 | -2.405067 | -0.174742 | -1.036004 |
| C16 | -3.060009 | -1.418831 | -0.690837 |
| C17 | -2.091223 | -2.376584 | -0.673732 |
| C18 | -0.863971 | -1.707058 | -1.063292 |
| C19 | 1.543929  | -1.727429 | -1.634275 |
| C20 | 2.772666  | -2.447822 | -1.820192 |
| C21 | 3.739593  | -1.535680 | -2.121477 |
| C22 | 3.090262  | -0.232867 | -2.077006 |
| C23 | 3.073082  | 2.250705  | -2.069100 |
| C24 | 3.747686  | 3.527886  | -2.192097 |
| C25 | 2.780478  | 4.485035  | -2.229672 |
| C26 | 1.522399  | 3.795696  | -2.081658 |
| C27 | 0.294856  | 4.419117  | -1.983884 |
| H28 | 0.275690  | 5.498497  | -2.061471 |
| C29 | -3.053206 | 1.054921  | -1.098569 |
| H30 | -4.120475 | 1.066034  | -0.921341 |
| C31 | 0.352722  | -2.337435 | -1.251829 |
| H32 | 0.410842  | -3.395654 | -1.037836 |
| C33 | 3.708001  | 1.011736  | -2.110709 |
| H34 | 4.786974  | 1.047658  | -2.125093 |
| C35 | 0.936649  | 2.485903  | 3.292607  |
| H36 | 0.590399  | 1.719074  | 3.978393  |
| C37 | 0.104463  | 2.893565  | 2.268970  |
| H38 | -0.843657 | 2.406513  | 2.113066  |
| C39 | 0.533740  | 3.867860  | 1.356692  |
| H40 | -0.129996 | 4.172965  | 0.560254  |
| C41 | 1.790479  | 4.438040  | 1.464360  |
| H42 | 2.139533  | 5.187946  | 0.766066  |
| C43 | 2.611396  | 4.057419  | 2.527397  |
| O44 | 3.803785  | 4.702756  | 2.663513  |
| C45 | 4.544470  | 4.677328  | 3.844876  |
| O46 | 5.472576  | 5.458565  | 3.899606  |
| C47 | 4.111214  | 3.732086  | 4.847854  |
| C48 | 3.048772  | 2.893996  | 4.611976  |
| O49 | 2.754463  | 1.967763  | 5.526813  |
| H50 | 1.904487  | 1.551308  | 5.393572  |
| C51 | 2.203853  | 3.083113  | 3.450286  |
| H52 | -0.393470 | 2.741401  | -5.515852 |
| H53 | -2.265869 | 5.570294  | -1.578052 |
| H54 | -4.178105 | 3.708394  | -1.170142 |
| H55 | -4.133078 | -1.478561 | -0.535397 |

|     |           |           |           |
|-----|-----------|-----------|-----------|
| H56 | -2.093898 | -3.441292 | -0.420892 |
| H57 | 2.841908  | -3.527780 | -1.755957 |
| H58 | 4.761429  | -1.834125 | -2.369650 |
| H59 | 4.824939  | 3.656921  | -2.216514 |
| H60 | 2.853276  | 5.558934  | -2.395577 |
| H61 | 4.385300  | 3.925208  | 5.904241  |

Warfarin 6-7 Transition State Doublet

|     |           |           |           |
|-----|-----------|-----------|-----------|
| C1  | -0.827811 | 2.005529  | -4.687505 |
| H2  | -1.539903 | 1.394193  | -5.248292 |
| H3  | -1.402735 | 2.592201  | -3.973760 |
| S4  | 0.244513  | 0.799363  | -3.813043 |
| O5  | 0.795799  | 1.207959  | 0.357051  |
| Fe6 | 0.366200  | 1.142254  | -1.367374 |
| N7  | -1.073941 | 2.518724  | -1.447577 |
| N8  | -1.042243 | -0.294933 | -1.058727 |
| N9  | 1.781758  | -0.321749 | -1.599425 |
| N10 | 1.721567  | 2.526855  | -1.865597 |
| C11 | -0.927279 | 3.854157  | -1.726045 |
| C12 | -2.181938 | 4.538667  | -1.584196 |
| C13 | -3.117863 | 3.592639  | -1.297805 |
| C14 | -2.421504 | 2.332355  | -1.222900 |
| C15 | -2.380022 | -0.111017 | -0.881417 |
| C16 | -3.043483 | -1.370435 | -0.609291 |
| C17 | -2.072515 | -2.327214 | -0.603643 |
| C18 | -0.835420 | -1.637387 | -0.922757 |
| C19 | 1.572782  | -1.657934 | -1.464816 |
| C20 | 2.787380  | -2.385213 | -1.724525 |
| C21 | 3.748636  | -1.472767 | -2.031137 |
| C22 | 3.109145  | -0.163591 | -1.917714 |
| C23 | 3.070691  | 2.323443  | -1.957806 |
| C24 | 3.743988  | 3.589017  | -2.146112 |
| C25 | 2.777672  | 4.547578  | -2.222686 |
| C26 | 1.516508  | 3.871612  | -2.053116 |
| C27 | 0.274094  | 4.483185  | -2.032625 |
| H28 | 0.236596  | 5.554331  | -2.184105 |
| C29 | -3.030086 | 1.114140  | -0.962945 |
| H30 | -4.102690 | 1.114810  | -0.822244 |
| C31 | 0.374859  | -2.274157 | -1.127823 |
| H32 | 0.413503  | -3.345397 | -0.991029 |
| C33 | 3.712560  | 1.087456  | -1.995671 |
| H34 | 4.788591  | 1.132456  | -2.075870 |
| C35 | 1.155392  | 2.145804  | 2.797981  |
| H36 | 0.853844  | 1.322629  | 3.431312  |
| C37 | 0.383428  | 2.423881  | 1.617402  |
| H38 | -0.655128 | 2.108663  | 1.630521  |
| C39 | 0.671717  | 3.679632  | 0.984955  |
| H40 | -0.030727 | 4.057067  | 0.268034  |
| C41 | 1.817495  | 4.387652  | 1.248133  |
| H42 | 2.075382  | 5.277405  | 0.687378  |
| C43 | 2.631205  | 3.997630  | 2.315044  |
| O44 | 3.734466  | 4.736347  | 2.561148  |
| C45 | 4.469099  | 4.661573  | 3.753103  |
| O46 | 5.383913  | 5.443669  | 3.845046  |
| C47 | 4.007195  | 3.693598  | 4.723031  |
| C48 | 2.983922  | 2.826105  | 4.422642  |
| O49 | 2.626723  | 1.923341  | 5.335246  |
| H50 | 1.760715  | 1.540786  | 5.183715  |
| C51 | 2.258450  | 2.922775  | 3.156664  |

|     |           |           |           |
|-----|-----------|-----------|-----------|
| H52 | -0.393285 | 2.710489  | -5.441536 |
| H53 | -2.288200 | 5.610679  | -1.602073 |
| H54 | -4.186140 | 3.733176  | -1.156176 |
| H55 | -4.121101 | -1.451557 | -0.504158 |
| H56 | -2.079845 | -3.404726 | -0.393792 |
| H57 | 2.845065  | -3.471744 | -1.723275 |
| H58 | 4.751620  | -1.785451 | -2.336067 |
| H59 | 4.822641  | 3.695905  | -2.200820 |
| H60 | 2.856726  | 5.611888  | -2.404152 |
| H61 | 4.284880  | 3.874892  | 5.788937  |

Warfarin 6-7 Transition State Quartet

|     |           |           |           |
|-----|-----------|-----------|-----------|
| C1  | -0.849836 | 1.992298  | -4.698712 |
| H2  | -1.549691 | 1.373304  | -5.264109 |
| H3  | -1.434402 | 2.574077  | -3.987552 |
| S4  | 0.238821  | 0.813010  | -3.816031 |
| O5  | 0.664292  | 1.307846  | 0.315639  |
| Fe6 | 0.392468  | 1.092714  | -1.397501 |
| N7  | -1.072625 | 2.485578  | -1.508004 |
| N8  | -1.024639 | -0.325477 | -1.087577 |
| N9  | 1.777680  | -0.330647 | -1.626234 |
| N10 | 1.752893  | 2.504053  | -1.856650 |
| C11 | -0.912097 | 3.826223  | -1.751475 |
| C12 | -2.164385 | 4.511295  | -1.598617 |
| C13 | -3.104077 | 3.562614  | -1.321505 |
| C14 | -2.412129 | 2.300661  | -1.268019 |
| C15 | -2.367330 | -0.131832 | -0.907024 |
| C16 | -3.027538 | -1.389425 | -0.619586 |
| C17 | -2.059683 | -2.346717 | -0.610882 |
| C18 | -0.820846 | -1.665990 | -0.940735 |
| C19 | 1.568637  | -1.678005 | -1.486432 |
| C20 | 2.787066  | -2.391780 | -1.742753 |
| C21 | 3.746736  | -1.477229 | -2.049412 |
| C22 | 3.115800  | -0.169498 | -1.941425 |
| C23 | 3.096326  | 2.306113  | -1.957372 |
| C24 | 3.762663  | 3.577994  | -2.144739 |
| C25 | 2.791393  | 4.529464  | -2.211304 |
| C26 | 1.533629  | 3.844525  | -2.037971 |
| C27 | 0.291928  | 4.457111  | -2.030008 |
| H28 | 0.257781  | 5.529636  | -2.168302 |
| C29 | -3.021837 | 1.083942  | -0.995863 |
| H30 | -4.091513 | 1.086315  | -0.844188 |
| C31 | 0.386992  | -2.303035 | -1.142059 |
| H32 | 0.433882  | -3.371772 | -0.992807 |
| C33 | 3.732545  | 1.070903  | -2.010065 |
| H34 | 4.809316  | 1.106125  | -2.089463 |
| C35 | 1.146618  | 2.164221  | 2.790624  |
| H36 | 0.846449  | 1.331574  | 3.412681  |
| C37 | 0.346015  | 2.471710  | 1.634843  |
| H38 | -0.687087 | 2.154994  | 1.664706  |
| C39 | 0.631405  | 3.743434  | 1.018665  |
| H40 | -0.079499 | 4.125277  | 0.311729  |
| C41 | 1.784477  | 4.431899  | 1.271396  |
| H42 | 2.043558  | 5.324852  | 0.716248  |
| C43 | 2.618770  | 4.019647  | 2.323302  |
| O44 | 3.723734  | 4.755524  | 2.565658  |
| C45 | 4.467590  | 4.664574  | 3.753221  |
| O46 | 5.385880  | 5.442560  | 3.846387  |
| C47 | 4.007564  | 3.690442  | 4.716809  |

|     |           |           |           |
|-----|-----------|-----------|-----------|
| C48 | 2.984406  | 2.823760  | 4.407175  |
| O49 | 2.627505  | 1.911876  | 5.315258  |
| H50 | 1.757179  | 1.542504  | 5.167190  |
| C51 | 2.255686  | 2.932684  | 3.145423  |
| H52 | -0.410098 | 2.698557  | -5.446872 |
| H53 | -2.277102 | 5.585172  | -1.606396 |
| H54 | -4.171393 | 3.706624  | -1.169870 |
| H55 | -4.105260 | -1.466143 | -0.506346 |
| H56 | -2.065727 | -3.423284 | -0.394864 |
| H57 | 2.849631  | -3.478303 | -1.735284 |
| H58 | 4.750752  | -1.794752 | -2.347559 |
| H59 | 4.840092  | 3.689482  | -2.205056 |
| H60 | 2.863005  | 5.597289  | -2.394063 |
| H61 | 4.282634  | 3.868345  | 5.784507  |

Warfarin 6-8 Reactant Complex Doublet

|     |           |           |           |
|-----|-----------|-----------|-----------|
| C1  | -0.850671 | 1.742477  | -4.815863 |
| H2  | -1.514482 | 1.162375  | -5.467361 |
| H3  | -1.473371 | 2.249371  | -4.080818 |
| S4  | 0.236939  | 0.533298  | -4.005970 |
| O5  | 0.686677  | 1.057025  | 0.016685  |
| Fe6 | 0.358052  | 0.962905  | -1.585965 |
| N7  | -1.083221 | 2.381341  | -1.630468 |
| N8  | -1.067699 | -0.430158 | -1.275025 |
| N9  | 1.763723  | -0.456252 | -1.839369 |
| N10 | 1.740111  | 2.375297  | -2.071821 |
| C11 | -0.898666 | 3.728783  | -1.777056 |
| C12 | -2.136723 | 4.435221  | -1.598800 |
| C13 | -3.093859 | 3.494507  | -1.372217 |
| C14 | -2.423389 | 2.216713  | -1.388863 |
| C15 | -2.398418 | -0.227902 | -1.058859 |
| C16 | -3.052405 | -1.473625 | -0.711726 |
| C17 | -2.085402 | -2.431377 | -0.706614 |
| C18 | -0.855840 | -1.760170 | -1.089884 |
| C19 | 1.557059  | -1.787005 | -1.656073 |
| C20 | 2.780008  | -2.511107 | -1.867091 |
| C21 | 3.743733  | -1.602302 | -2.181747 |
| C22 | 3.100934  | -0.297221 | -2.123663 |
| C23 | 3.090416  | 2.185814  | -2.161103 |
| C24 | 3.763443  | 3.462668  | -2.294065 |
| C25 | 2.795436  | 4.420082  | -2.320749 |
| C26 | 1.539509  | 3.729666  | -2.158286 |
| C27 | 0.313680  | 4.354322  | -2.035421 |
| H28 | 0.297849  | 5.434865  | -2.097200 |
| C29 | -3.043479 | 0.996605  | -1.147239 |
| H30 | -4.114898 | 1.011856  | -1.001176 |
| C31 | 0.362356  | -2.394216 | -1.284956 |
| H32 | 0.412775  | -3.458377 | -1.096876 |
| C33 | 3.721152  | 0.946462  | -2.192191 |
| H34 | 4.800722  | 0.977424  | -2.236955 |
| C35 | 1.158317  | 2.389245  | 3.181081  |
| H36 | 0.815858  | 1.603510  | 3.843183  |
| C37 | 0.290784  | 2.879504  | 2.225026  |
| H38 | -0.695687 | 2.451386  | 2.123434  |
| C39 | 0.720933  | 3.856943  | 1.318203  |
| H40 | 0.037896  | 4.211700  | 0.557974  |
| C41 | 2.010395  | 4.359415  | 1.378048  |
| H42 | 2.366278  | 5.107582  | 0.679975  |
| C43 | 2.858902  | 3.915069  | 2.393181  |

|     |           |           |           |
|-----|-----------|-----------|-----------|
| O44 | 4.081201  | 4.508488  | 2.500528  |
| C45 | 4.819513  | 4.486962  | 3.681691  |
| O46 | 5.756023  | 5.255108  | 3.727168  |
| C47 | 4.364661  | 3.571546  | 4.706999  |
| C48 | 3.298772  | 2.734948  | 4.467227  |
| O49 | 2.981376  | 1.830622  | 5.400925  |
| H50 | 2.119268  | 1.439392  | 5.276144  |
| C51 | 2.453327  | 2.935376  | 3.308423  |
| H52 | -0.389718 | 2.507733  | -5.461651 |
| H53 | -2.241768 | 5.511048  | -1.623570 |
| H54 | -4.151982 | 3.665853  | -1.191809 |
| H55 | -4.117545 | -1.536518 | -0.501525 |
| H56 | -2.089739 | -3.496221 | -0.457785 |
| H57 | 2.838383  | -3.589888 | -1.830051 |
| H58 | 4.758380  | -1.900613 | -2.455215 |
| H59 | 4.841184  | 3.589982  | -2.324032 |
| H60 | 2.870552  | 5.496655  | -2.472528 |
| H61 | 4.568437  | 3.838347  | 5.768527  |

Warfarin 6-8 Reactant Complex Quartet

|     |           |           |           |
|-----|-----------|-----------|-----------|
| C1  | -0.844532 | 1.746815  | -4.816094 |
| H2  | -1.505864 | 1.162589  | -5.467575 |
| H3  | -1.469129 | 2.250789  | -4.080674 |
| S4  | 0.245942  | 0.540608  | -4.009205 |
| O5  | 0.638594  | 1.053348  | 0.023198  |
| Fe6 | 0.362527  | 0.961132  | -1.583909 |
| N7  | -1.082102 | 2.380027  | -1.636078 |
| N8  | -1.068797 | -0.435249 | -1.288298 |
| N9  | 1.764358  | -0.457274 | -1.840333 |
| N10 | 1.742063  | 2.371275  | -2.064938 |
| C11 | -0.897723 | 3.725926  | -1.777516 |
| C12 | -2.135045 | 4.432747  | -1.599563 |
| C13 | -3.093384 | 3.491924  | -1.375510 |
| C14 | -2.423378 | 2.213050  | -1.394285 |
| C15 | -2.397488 | -0.232300 | -1.069371 |
| C16 | -3.051814 | -1.476090 | -0.715575 |
| C17 | -2.083679 | -2.435417 | -0.708132 |
| C18 | -0.855200 | -1.765121 | -1.095693 |
| C19 | 1.556403  | -1.787596 | -1.660385 |
| C20 | 2.778956  | -2.512472 | -1.870388 |
| C21 | 3.744506  | -1.602675 | -2.183935 |
| C22 | 3.102264  | -0.298731 | -2.123570 |
| C23 | 3.090764  | 2.182406  | -2.156327 |
| C24 | 3.763440  | 3.458362  | -2.294414 |
| C25 | 2.795940  | 4.416238  | -2.322776 |
| C26 | 1.540372  | 3.726713  | -2.155942 |
| C27 | 0.315730  | 4.352890  | -2.034541 |
| H28 | 0.300039  | 5.432400  | -2.098890 |
| C29 | -3.042887 | 0.993804  | -1.156685 |
| H30 | -4.114247 | 1.007864  | -1.008682 |
| C31 | 0.363130  | -2.397087 | -1.287988 |
| H32 | 0.417525  | -3.459557 | -1.094277 |
| C33 | 3.724757  | 0.943168  | -2.185687 |
| H34 | 4.803419  | 0.973364  | -2.225249 |
| C35 | 1.160953  | 2.392972  | 3.188838  |
| H36 | 0.815793  | 1.612414  | 3.855363  |
| C37 | 0.291161  | 2.883945  | 2.233906  |
| H38 | -0.698870 | 2.464004  | 2.141968  |
| C39 | 0.721973  | 3.857510  | 1.322692  |

|     |           |           |           |
|-----|-----------|-----------|-----------|
| H40 | 0.037527  | 4.214089  | 0.564327  |
| C41 | 2.012591  | 4.357901  | 1.379924  |
| H42 | 2.368589  | 5.102940  | 0.678656  |
| C43 | 2.861102  | 3.916486  | 2.396342  |
| O44 | 4.081561  | 4.513189  | 2.504345  |
| C45 | 4.822780  | 4.489614  | 3.683952  |
| O46 | 5.759537  | 5.256456  | 3.728218  |
| C47 | 4.369305  | 3.574007  | 4.709676  |
| C48 | 3.304177  | 2.736037  | 4.471720  |
| O49 | 2.988207  | 1.831194  | 5.404563  |
| H50 | 2.123947  | 1.443329  | 5.284793  |
| C51 | 2.457101  | 2.936027  | 3.312094  |
| H52 | -0.386258 | 2.511732  | -5.463207 |
| H53 | -2.238813 | 5.509261  | -1.623952 |
| H54 | -4.151197 | 3.663263  | -1.194187 |
| H55 | -4.114850 | -1.537487 | -0.499775 |
| H56 | -2.085305 | -3.498969 | -0.456112 |
| H57 | 2.838664  | -3.589748 | -1.828438 |
| H58 | 4.757840  | -1.900158 | -2.456590 |
| H59 | 4.841438  | 3.582821  | -2.325752 |
| H60 | 2.871604  | 5.493330  | -2.475740 |
| H61 | 4.573979  | 3.841661  | 5.770572  |

Warfarin 6-8 Transition State Doublet

|     |           |           |           |
|-----|-----------|-----------|-----------|
| C1  | -0.814901 | 1.742056  | -4.681258 |
| H2  | -1.469773 | 1.101769  | -5.282535 |
| H3  | -1.442247 | 2.275151  | -3.968755 |
| S4  | 0.316033  | 0.606132  | -3.803957 |
| O5  | 0.861688  | 1.127763  | 0.306049  |
| Fe6 | 0.393041  | 1.073067  | -1.405374 |
| N7  | -1.049976 | 2.459289  | -1.474569 |
| N8  | -1.027648 | -0.348763 | -1.079006 |
| N9  | 1.801373  | -0.379572 | -1.621516 |
| N10 | 1.741560  | 2.465742  | -1.920535 |
| C11 | -0.900517 | 3.796513  | -1.747208 |
| C12 | -2.152204 | 4.484787  | -1.602415 |
| C13 | -3.091325 | 3.541203  | -1.321153 |
| C14 | -2.398680 | 2.278222  | -1.252998 |
| C15 | -2.367936 | -0.163298 | -0.906621 |
| C16 | -3.032210 | -1.422010 | -0.630467 |
| C17 | -2.061829 | -2.379477 | -0.633239 |
| C18 | -0.823154 | -1.691478 | -0.949959 |
| C19 | 1.586614  | -1.714054 | -1.491165 |
| C20 | 2.796611  | -2.442522 | -1.769407 |
| C21 | 3.754266  | -1.533493 | -2.086938 |
| C22 | 3.123451  | -0.222094 | -1.960966 |
| C23 | 3.089192  | 2.262227  | -2.026628 |
| C24 | 3.759789  | 3.526911  | -2.232620 |
| C25 | 2.793406  | 4.485678  | -2.302921 |
| C26 | 1.534743  | 3.810420  | -2.111673 |
| C27 | 0.296076  | 4.424359  | -2.068955 |
| H28 | 0.256718  | 5.495171  | -2.220688 |
| C29 | -3.014661 | 1.060806  | -1.005374 |
| H30 | -4.091159 | 1.067630  | -0.901475 |
| C31 | 0.387590  | -2.327555 | -1.158668 |
| H32 | 0.423556  | -3.401412 | -1.035531 |
| C33 | 3.728024  | 1.025548  | -2.056465 |
| H34 | 4.804032  | 1.066798  | -2.158474 |
| C35 | 1.327313  | 2.035814  | 2.735082  |

|     |           |           |           |
|-----|-----------|-----------|-----------|
| H36 | 1.009158  | 1.223025  | 3.377025  |
| C37 | 0.523432  | 2.347303  | 1.585049  |
| H38 | -0.522400 | 2.062866  | 1.627937  |
| C39 | 0.831849  | 3.590363  | 0.938632  |
| H40 | 0.122405  | 3.983378  | 0.235847  |
| C41 | 2.006776  | 4.261759  | 1.168855  |
| H42 | 2.273239  | 5.147763  | 0.604533  |
| C43 | 2.846680  | 3.837410  | 2.201012  |
| O44 | 3.980662  | 4.542713  | 2.409313  |
| C45 | 4.722357  | 4.477640  | 3.594253  |
| O46 | 5.650695  | 5.247771  | 3.666504  |
| C47 | 4.250972  | 3.539762  | 4.590273  |
| C48 | 3.224707  | 2.669555  | 4.302521  |
| O49 | 2.870609  | 1.783898  | 5.235034  |
| H50 | 2.024982  | 1.369248  | 5.067055  |
| C51 | 2.473311  | 2.770149  | 3.051205  |
| H52 | -0.387117 | 2.487785  | -5.384196 |
| H53 | -2.259879 | 5.556066  | -1.638212 |
| H54 | -4.157216 | 3.694397  | -1.168256 |
| H55 | -4.104429 | -1.509150 | -0.472970 |
| H56 | -2.069305 | -3.454778 | -0.426167 |
| H57 | 2.841502  | -3.525724 | -1.790272 |
| H58 | 4.747893  | -1.840819 | -2.418846 |
| H59 | 4.838338  | 3.629437  | -2.296532 |
| H60 | 2.874169  | 5.553457  | -2.473462 |
| H61 | 4.471231  | 3.789028  | 5.658956  |

Warfarin 6-8 Transition State Quartet

|     |           |           |           |
|-----|-----------|-----------|-----------|
| C1  | -0.830969 | 1.735995  | -4.701335 |
| H2  | -1.473733 | 1.085248  | -5.302357 |
| H3  | -1.470730 | 2.263231  | -3.992772 |
| S4  | 0.315066  | 0.628831  | -3.816269 |
| O5  | 0.683219  | 1.239101  | 0.286372  |
| Fe6 | 0.406138  | 1.029412  | -1.418553 |
| N7  | -1.059298 | 2.431023  | -1.544782 |
| N8  | -1.020264 | -0.374357 | -1.104215 |
| N9  | 1.790244  | -0.382765 | -1.638674 |
| N10 | 1.763909  | 2.447548  | -1.906359 |
| C11 | -0.894536 | 3.772244  | -1.774582 |
| C12 | -2.141782 | 4.463260  | -1.618166 |
| C13 | -3.087212 | 3.517714  | -1.351130 |
| C14 | -2.400384 | 2.251601  | -1.308849 |
| C15 | -2.365544 | -0.178887 | -0.935332 |
| C16 | -3.027712 | -1.436232 | -0.645085 |
| C17 | -2.060390 | -2.394575 | -0.641891 |
| C18 | -0.818728 | -1.715178 | -0.966256 |
| C19 | 1.576247  | -1.728005 | -1.509665 |
| C20 | 2.788394  | -2.444021 | -1.787383 |
| C21 | 3.745112  | -1.530307 | -2.106509 |
| C22 | 3.120645  | -0.223070 | -1.982194 |
| C23 | 3.105997  | 2.252203  | -2.021309 |
| C24 | 3.771389  | 3.520788  | -2.225325 |
| C25 | 2.798679  | 4.473472  | -2.286535 |
| C26 | 1.544735  | 3.789033  | -2.091407 |
| C27 | 0.307455  | 4.404037  | -2.060191 |
| H28 | 0.273098  | 5.477158  | -2.189374 |
| C29 | -3.015685 | 1.035666  | -1.047735 |
| H30 | -4.090326 | 1.044640  | -0.931910 |
| C31 | 0.390398  | -2.351202 | -1.172230 |



|     |           |           |           |
|-----|-----------|-----------|-----------|
| H32 | 0.433107  | -3.423272 | -1.039989 |
| C33 | 3.741080  | 1.014579  | -2.068187 |
| H34 | 4.815951  | 1.044793  | -2.168939 |
| C35 | 1.314334  | 2.060275  | 2.751174  |
| H36 | 0.993535  | 1.248392  | 3.388836  |
| C37 | 0.483105  | 2.406278  | 1.629916  |
| H38 | -0.559130 | 2.126272  | 1.698138  |
| C39 | 0.794908  | 3.658997  | 0.995316  |
| H40 | 0.075665  | 4.059402  | 0.303051  |
| C41 | 1.979166  | 4.307140  | 1.210620  |
| H42 | 2.246260  | 5.202434  | 0.662148  |
| C43 | 2.840676  | 3.857875  | 2.223676  |
| O44 | 3.977196  | 4.561265  | 2.426936  |
| C45 | 4.727046  | 4.484893  | 3.605851  |
| O46 | 5.658049  | 5.251501  | 3.678644  |
| C47 | 4.258954  | 3.540478  | 4.597179  |
| C48 | 3.232250  | 2.670258  | 4.303352  |
| O49 | 2.883044  | 1.777647  | 5.234457  |
| H50 | 2.033736  | 1.368285  | 5.075255  |
| C51 | 2.476045  | 2.781125  | 3.056562  |
| H52 | -0.397897 | 2.481622  | -5.401019 |
| H53 | -2.252405 | 5.536221  | -1.641547 |
| H54 | -4.149976 | 3.677682  | -1.181752 |
| H55 | -4.100051 | -1.518473 | -0.480630 |
| H56 | -2.070254 | -3.468062 | -0.426372 |
| H57 | 2.840063  | -3.526344 | -1.800350 |
| H58 | 4.740737  | -1.838739 | -2.431770 |
| H59 | 4.848128  | 3.628631  | -2.295294 |
| H60 | 2.873479  | 5.543260  | -2.460083 |
| H61 | 4.480195  | 3.784550  | 5.668007  |

Warfarin 6-9 Reactant Complex Doublet

|     |           |           |           |
|-----|-----------|-----------|-----------|
| C1  | -0.839201 | 1.954054  | -4.803050 |
| H2  | -1.621703 | 1.389701  | -5.318923 |
| H3  | -1.330171 | 2.560038  | -4.044636 |
| S4  | 0.239764  | 0.708370  | -4.030290 |
| O5  | 0.718899  | 1.052432  | 0.019745  |
| Fe6 | 0.370997  | 1.000481  | -1.580555 |
| N7  | -1.061337 | 2.421651  | -1.588926 |
| N8  | -1.057582 | -0.397587 | -1.294391 |
| N9  | 1.765226  | -0.426142 | -1.875532 |
| N10 | 1.750741  | 2.416218  | -2.059998 |
| C11 | -0.878881 | 3.769531  | -1.727313 |
| C12 | -2.122660 | 4.469663  | -1.562969 |
| C13 | -3.081317 | 3.524176  | -1.366604 |
| C14 | -2.407279 | 2.249118  | -1.380734 |
| C15 | -2.389157 | -0.197398 | -1.087660 |
| C16 | -3.044776 | -1.438817 | -0.733866 |
| C17 | -2.074047 | -2.394720 | -0.707180 |
| C18 | -0.843378 | -1.725607 | -1.088515 |
| C19 | 1.566123  | -1.755195 | -1.659502 |
| C20 | 2.793390  | -2.477196 | -1.857119 |
| C21 | 3.748331  | -1.568343 | -2.198906 |
| C22 | 3.100649  | -0.265077 | -2.163184 |
| C23 | 3.097382  | 2.219963  | -2.185799 |
| C24 | 3.773729  | 3.495566  | -2.324931 |
| C25 | 2.812143  | 4.459730  | -2.317782 |
| C26 | 1.555180  | 3.773391  | -2.132310 |
| C27 | 0.332071  | 4.398213  | -1.992145 |

|     |           |           |           |
|-----|-----------|-----------|-----------|
| H28 | 0.313483  | 5.478568  | -2.062528 |
| C29 | -3.032541 | 1.029444  | -1.173493 |
| H30 | -4.106692 | 1.044681  | -1.045981 |
| C31 | 0.377651  | -2.359205 | -1.266282 |
| H32 | 0.434185  | -3.416169 | -1.044772 |
| C33 | 3.722477  | 0.979034  | -2.235747 |
| H34 | 4.801332  | 1.008890  | -2.289507 |
| C35 | 1.213227  | 2.447175  | 3.078200  |
| H36 | 0.909485  | 1.618858  | 3.705095  |
| C37 | 0.311978  | 2.951998  | 2.160203  |
| H38 | -0.663863 | 2.500795  | 2.054475  |
| C39 | 0.697158  | 3.993929  | 1.303930  |
| H40 | -0.006449 | 4.366513  | 0.573784  |
| C41 | 1.965584  | 4.548548  | 1.383233  |
| H42 | 2.279302  | 5.351057  | 0.728255  |
| C43 | 2.836953  | 4.093399  | 2.371399  |
| O44 | 4.019473  | 4.756399  | 2.526645  |
| C45 | 4.778899  | 4.673420  | 3.687083  |
| O46 | 5.651792  | 5.508111  | 3.804271  |
| C47 | 4.422897  | 3.626041  | 4.616351  |
| C48 | 3.373112  | 2.779295  | 4.338462  |
| O49 | 3.115591  | 1.787033  | 5.197152  |
| H50 | 2.241677  | 1.411708  | 5.089779  |
| C51 | 2.487587  | 3.036703  | 3.222454  |
| H52 | -0.415919 | 2.632701  | -5.567390 |
| H53 | -2.236016 | 5.544050  | -1.576640 |
| H54 | -4.145218 | 3.684930  | -1.211631 |
| H55 | -4.111764 | -1.502304 | -0.531395 |
| H56 | -2.080040 | -3.456843 | -0.452632 |
| H57 | 2.864977  | -3.556068 | -1.793234 |
| H58 | 4.759407  | -1.868420 | -2.474442 |
| H59 | 4.851418  | 3.610243  | -2.387921 |
| H60 | 2.887730  | 5.541398  | -2.457485 |
| H61 | 4.687981  | 3.778379  | 5.686713  |

Warfarin 6-9 Reactant Complex Quartet

|     |           |           |           |
|-----|-----------|-----------|-----------|
| C1  | -0.834841 | 1.956606  | -4.801791 |
| H2  | -1.614978 | 1.383287  | -5.311579 |
| H3  | -1.327707 | 2.563255  | -4.044916 |
| S4  | 0.253055  | 0.721401  | -4.028104 |
| O5  | 0.673981  | 1.044189  | 0.029883  |
| Fe6 | 0.377131  | 0.999524  | -1.574110 |
| N7  | -1.060476 | 2.421246  | -1.593197 |
| N8  | -1.056364 | -0.402181 | -1.301503 |
| N9  | 1.769458  | -0.424789 | -1.866235 |
| N10 | 1.752687  | 2.414118  | -2.049148 |
| C11 | -0.878862 | 3.767693  | -1.727631 |
| C12 | -2.123358 | 4.467891  | -1.562319 |
| C13 | -3.081844 | 3.520986  | -1.367381 |
| C14 | -2.407507 | 2.245810  | -1.384524 |
| C15 | -2.386207 | -0.201090 | -1.093930 |
| C16 | -3.041886 | -1.440962 | -0.735425 |
| C17 | -2.070904 | -2.397091 | -0.704900 |
| C18 | -0.839790 | -1.729546 | -1.088373 |
| C19 | 1.570041  | -1.755172 | -1.656906 |
| C20 | 2.797403  | -2.475102 | -1.861570 |
| C21 | 3.751969  | -1.566029 | -2.200844 |
| C22 | 3.105353  | -0.262552 | -2.155989 |
| C23 | 3.098712  | 2.220200  | -2.175426 |

|     |           |           |           |
|-----|-----------|-----------|-----------|
| C24 | 3.773437  | 3.495187  | -2.320047 |
| C25 | 2.810296  | 4.459188  | -2.315234 |
| C26 | 1.554317  | 3.773140  | -2.127366 |
| C27 | 0.332270  | 4.397625  | -1.990253 |
| H28 | 0.314625  | 5.478175  | -2.060328 |
| C29 | -3.031271 | 1.026901  | -1.181442 |
| H30 | -4.105318 | 1.041026  | -1.054361 |
| C31 | 0.380951  | -2.361145 | -1.264870 |
| H32 | 0.438129  | -3.418954 | -1.046939 |
| C33 | 3.726030  | 0.980344  | -2.223150 |
| H34 | 4.805642  | 1.011225  | -2.275617 |
| C35 | 1.210378  | 2.449586  | 3.077928  |
| H36 | 0.904392  | 1.621016  | 3.704531  |
| C37 | 0.308679  | 2.960519  | 2.164390  |
| H38 | -0.669097 | 2.508060  | 2.057937  |
| C39 | 0.693900  | 3.999434  | 1.307659  |
| H40 | -0.009865 | 4.372841  | 0.577500  |
| C41 | 1.963163  | 4.550026  | 1.384532  |
| H42 | 2.278837  | 5.353174  | 0.728132  |
| C43 | 2.836101  | 4.090608  | 2.370217  |
| O44 | 4.021494  | 4.750628  | 2.522738  |
| C45 | 4.779552  | 4.665702  | 3.683882  |
| O46 | 5.652458  | 5.500719  | 3.802511  |
| C47 | 4.424776  | 3.618393  | 4.611907  |
| C48 | 3.372348  | 2.772338  | 4.332115  |
| O49 | 3.113883  | 1.777581  | 5.190546  |
| H50 | 2.239646  | 1.406485  | 5.084583  |
| C51 | 2.486151  | 3.034735  | 3.218592  |
| H52 | -0.415750 | 2.632627  | -5.570524 |
| H53 | -2.236588 | 5.541951  | -1.574894 |
| H54 | -4.145182 | 3.682095  | -1.212335 |
| H55 | -4.108620 | -1.504519 | -0.532021 |
| H56 | -2.078547 | -3.459179 | -0.449039 |
| H57 | 2.868740  | -3.555184 | -1.797443 |
| H58 | 4.765455  | -1.860281 | -2.481450 |
| H59 | 4.850633  | 3.608919  | -2.387158 |
| H60 | 2.886503  | 5.539741  | -2.456430 |
| H61 | 4.688525  | 3.768167  | 5.682247  |

Warfarin 6-9 Transition State Doublet

|     |           |           |           |
|-----|-----------|-----------|-----------|
| C1  | -0.819416 | 1.929479  | -4.708787 |
| H2  | -1.576115 | 1.312551  | -5.202793 |
| H3  | -1.337790 | 2.547576  | -3.978649 |
| S4  | 0.297258  | 0.748533  | -3.866258 |
| O5  | 0.882959  | 1.194481  | 0.279703  |
| Fe6 | 0.401329  | 1.114231  | -1.415443 |
| N7  | -1.035702 | 2.499851  | -1.466330 |
| N8  | -1.017459 | -0.315404 | -1.093441 |
| N9  | 1.801159  | -0.350061 | -1.663080 |
| N10 | 1.746941  | 2.500823  | -1.952885 |
| C11 | -0.885375 | 3.839650  | -1.718925 |
| C12 | -2.140762 | 4.520414  | -1.576542 |
| C13 | -3.081466 | 3.570526  | -1.327916 |
| C14 | -2.386054 | 2.310589  | -1.266811 |
| C15 | -2.359820 | -0.131963 | -0.934611 |
| C16 | -3.024986 | -1.388520 | -0.654356 |
| C17 | -2.053397 | -2.343507 | -0.634968 |
| C18 | -0.812888 | -1.656613 | -0.948340 |
| C19 | 1.594080  | -1.684905 | -1.504316 |

|     |           |           |           |
|-----|-----------|-----------|-----------|
| C20 | 2.804986  | -2.415555 | -1.775754 |
| C21 | 3.757176  | -1.505033 | -2.117661 |
| C22 | 3.120373  | -0.195003 | -2.011421 |
| C23 | 3.092934  | 2.291657  | -2.080049 |
| C24 | 3.768239  | 3.555297  | -2.277066 |
| C25 | 2.808730  | 4.522050  | -2.311069 |
| C26 | 1.547564  | 3.851813  | -2.111216 |
| C27 | 0.312300  | 4.469104  | -2.039584 |
| H28 | 0.275871  | 5.542391  | -2.175725 |
| C29 | -3.004702 | 1.091681  | -1.042013 |
| H30 | -4.082739 | 1.098320  | -0.958003 |
| C31 | 0.399199  | -2.295504 | -1.148601 |
| H32 | 0.434492  | -3.366645 | -1.005566 |
| C33 | 3.726843  | 1.053021  | -2.117215 |
| H34 | 4.801302  | 1.093044  | -2.224450 |
| C35 | 1.406412  | 2.092794  | 2.667323  |
| H36 | 1.137181  | 1.238447  | 3.272849  |
| C37 | 0.561318  | 2.426375  | 1.555455  |
| H38 | -0.476560 | 2.118136  | 1.614061  |
| C39 | 0.812997  | 3.709341  | 0.962331  |
| H40 | 0.071757  | 4.112201  | 0.298665  |
| C41 | 1.961625  | 4.422601  | 1.208341  |
| H42 | 2.171590  | 5.354666  | 0.698276  |
| C43 | 2.837621  | 3.986711  | 2.206865  |
| O44 | 3.930270  | 4.753143  | 2.457248  |
| C45 | 4.696872  | 4.644795  | 3.615788  |
| O46 | 5.558482  | 5.485479  | 3.750606  |
| C47 | 4.333236  | 3.584811  | 4.528104  |
| C48 | 3.323743  | 2.704557  | 4.209918  |
| O49 | 3.027455  | 1.741404  | 5.089879  |
| H50 | 2.156108  | 1.365695  | 4.956658  |
| C51 | 2.533355  | 2.855108  | 2.993301  |
| H52 | -0.416135 | 2.600625  | -5.502397 |
| H53 | -2.256591 | 5.589749  | -1.595540 |
| H54 | -4.151094 | 3.713439  | -1.193215 |
| H55 | -4.099370 | -1.475291 | -0.504708 |
| H56 | -2.068188 | -3.418494 | -0.420853 |
| H57 | 2.862406  | -3.500698 | -1.769474 |
| H58 | 4.750429  | -1.814861 | -2.445669 |
| H59 | 4.846502  | 3.647114  | -2.364293 |
| H60 | 2.891886  | 5.595222  | -2.463736 |
| H61 | 4.612028  | 3.731519  | 5.601242  |

Warfarin 6-9 Transition State Quartet

|     |           |           |           |
|-----|-----------|-----------|-----------|
| C1  | -0.829169 | 1.916697  | -4.736699 |
| H2  | -1.574563 | 1.293468  | -5.238336 |
| H3  | -1.359277 | 2.526787  | -4.006929 |
| S4  | 0.296651  | 0.756955  | -3.884857 |
| O5  | 0.725652  | 1.300079  | 0.263677  |
| Fe6 | 0.416600  | 1.078709  | -1.421654 |
| N7  | -1.047855 | 2.470448  | -1.535000 |
| N8  | -1.011717 | -0.338637 | -1.117157 |
| N9  | 1.791449  | -0.353332 | -1.673961 |
| N10 | 1.765743  | 2.480552  | -1.942708 |
| C11 | -0.882493 | 3.814453  | -1.742959 |
| C12 | -2.133023 | 4.499773  | -1.584896 |
| C13 | -3.080286 | 3.547953  | -1.350718 |
| C14 | -2.391461 | 2.284079  | -1.320435 |
| C15 | -2.358622 | -0.147540 | -0.961928 |

|     |           |           |           |
|-----|-----------|-----------|-----------|
| C16 | -3.021867 | -1.401505 | -0.665525 |
| C17 | -2.052164 | -2.358221 | -0.640911 |
| C18 | -0.809631 | -1.678113 | -0.961935 |
| C19 | 1.584196  | -1.697950 | -1.516436 |
| C20 | 2.797830  | -2.418344 | -1.788680 |
| C21 | 3.750358  | -1.504782 | -2.130642 |
| C22 | 3.119281  | -0.197575 | -2.024718 |
| C23 | 3.106217  | 2.278918  | -2.075663 |
| C24 | 3.776747  | 3.546090  | -2.270501 |
| C25 | 2.811891  | 4.508514  | -2.296464 |
| C26 | 1.554207  | 3.829847  | -2.094683 |
| C27 | 0.320198  | 4.447003  | -2.029400 |
| H28 | 0.288401  | 5.522797  | -2.140321 |
| C29 | -3.009469 | 1.065457  | -1.082678 |
| H30 | -4.086009 | 1.070697  | -0.984453 |
| C31 | 0.401740  | -2.316481 | -1.158066 |
| H32 | 0.444799  | -3.386701 | -1.009012 |
| C33 | 3.738365  | 1.040518  | -2.121920 |
| H34 | 4.812988  | 1.071167  | -2.222268 |
| C35 | 1.385850  | 2.123253  | 2.702483  |
| H36 | 1.097764  | 1.288413  | 3.327345  |
| C37 | 0.525591  | 2.473160  | 1.612433  |
| H38 | -0.507859 | 2.168783  | 1.694611  |
| C39 | 0.784819  | 3.756825  | 1.020473  |
| H40 | 0.038291  | 4.167551  | 0.363687  |
| C41 | 1.947314  | 4.449789  | 1.247544  |
| H42 | 2.162609  | 5.377721  | 0.734333  |
| C43 | 2.837091  | 4.000057  | 2.233146  |
| O44 | 3.935337  | 4.759711  | 2.475164  |
| C45 | 4.707297  | 4.645235  | 3.629567  |
| O46 | 5.573926  | 5.483789  | 3.764206  |
| C47 | 4.345887  | 3.583615  | 4.539077  |
| C48 | 3.330494  | 2.707628  | 4.223041  |
| O49 | 3.038416  | 1.741720  | 5.100508  |
| H50 | 2.162960  | 1.372458  | 4.976314  |
| C51 | 2.532420  | 2.869289  | 3.012954  |
| H52 | -0.424069 | 2.593342  | -5.523975 |
| H53 | -2.251249 | 5.570141  | -1.595213 |
| H54 | -4.147330 | 3.697360  | -1.203285 |
| H55 | -4.095494 | -1.485424 | -0.508701 |
| H56 | -2.066194 | -3.430560 | -0.419116 |
| H57 | 2.861251  | -3.502803 | -1.781060 |
| H58 | 4.747833  | -1.812392 | -2.451088 |
| H59 | 4.853221  | 3.642078  | -2.361327 |
| H60 | 2.891797  | 5.582687  | -2.451004 |
| H61 | 4.624838  | 3.725636  | 5.613667  |

Warfarin 6-10 Reactant Complex Doublet

|     |           |           |           |
|-----|-----------|-----------|-----------|
| C1  | -0.897379 | 1.800702  | -4.850402 |
| H2  | -1.628391 | 1.206120  | -5.405012 |
| H3  | -1.439945 | 2.369170  | -4.097902 |
| S4  | 0.224363  | 0.604047  | -4.064198 |
| O5  | 0.700740  | 1.036270  | -0.022365 |
| Fe6 | 0.359383  | 0.957997  | -1.622032 |
| N7  | -1.075603 | 2.381976  | -1.634610 |
| N8  | -1.058196 | -0.436711 | -1.292821 |
| N9  | 1.754185  | -0.467413 | -1.901000 |
| N10 | 1.734785  | 2.372742  | -2.111088 |
| C11 | -0.892804 | 3.730039  | -1.776199 |

|     |           |           |           |
|-----|-----------|-----------|-----------|
| C12 | -2.131833 | 4.434562  | -1.592972 |
| C13 | -3.086412 | 3.491453  | -1.363498 |
| C14 | -2.415349 | 2.214848  | -1.386022 |
| C15 | -2.380311 | -0.226906 | -1.052833 |
| C16 | -3.030879 | -1.459554 | -0.667219 |
| C17 | -2.071518 | -2.425202 | -0.656657 |
| C18 | -0.844761 | -1.763545 | -1.072408 |
| C19 | 1.554259  | -1.796120 | -1.685231 |
| C20 | 2.778036  | -2.519934 | -1.894251 |
| C21 | 3.736262  | -1.612958 | -2.231121 |
| C22 | 3.089706  | -0.308424 | -2.191594 |
| C23 | 3.081808  | 2.176169  | -2.225911 |
| C24 | 3.759918  | 3.450401  | -2.358666 |
| C25 | 2.799075  | 4.416419  | -2.355535 |
| C26 | 1.541241  | 3.730464  | -2.178961 |
| C27 | 0.318443  | 4.357732  | -2.037131 |
| H28 | 0.302863  | 5.438596  | -2.098585 |
| C29 | -3.029715 | 0.996361  | -1.138078 |
| H30 | -4.099084 | 1.004307  | -0.969870 |
| C31 | 0.371249  | -2.397484 | -1.269278 |
| H32 | 0.429757  | -3.453757 | -1.044156 |
| C33 | 3.709147  | 0.936211  | -2.266500 |
| H34 | 4.788558  | 0.968034  | -2.314249 |
| C35 | 1.155911  | 2.304136  | 3.303964  |
| H36 | 0.796461  | 1.535388  | 3.977695  |
| C37 | 0.335906  | 2.739037  | 2.281986  |
| H38 | -0.628505 | 2.278608  | 2.126510  |
| C39 | 0.790006  | 3.706625  | 1.372631  |
| H40 | 0.151250  | 4.008618  | 0.553908  |
| C41 | 2.048515  | 4.271435  | 1.510004  |
| H42 | 2.413284  | 5.022038  | 0.821098  |
| C43 | 2.840393  | 3.888462  | 2.592299  |
| O44 | 4.017149  | 4.555486  | 2.786188  |
| C45 | 4.633621  | 4.612906  | 4.027881  |
| O46 | 5.532284  | 5.427916  | 4.130398  |
| C47 | 4.155381  | 3.696133  | 5.035836  |
| C48 | 3.200170  | 2.751452  | 4.707803  |
| O49 | 2.908919  | 1.820517  | 5.609957  |
| H50 | 2.164221  | 1.268092  | 5.370188  |
| C51 | 2.426741  | 2.897687  | 3.491395  |
| H52 | -0.478780 | 2.506966  | -5.587077 |
| H53 | -2.237079 | 5.511099  | -1.618849 |
| H54 | -4.142627 | 3.651127  | -1.167287 |
| H55 | -4.088963 | -1.478471 | -0.437733 |
| H56 | -2.081043 | -3.491885 | -0.407443 |
| H57 | 2.840637  | -3.599761 | -1.844611 |
| H58 | 4.751112  | -1.910339 | -2.497889 |
| H59 | 4.838074  | 3.557097  | -2.415096 |
| H60 | 2.874982  | 5.497695  | -2.493182 |
| H61 | 4.192361  | 4.008708  | 6.106235  |

Warfarin 6-10 Reactant Complex Quartet

|     |           |          |           |
|-----|-----------|----------|-----------|
| C1  | -0.894096 | 1.803671 | -4.852562 |
| H2  | -1.624676 | 1.201583 | -5.399405 |
| H3  | -1.434897 | 2.374384 | -4.100431 |
| S4  | 0.237721  | 0.617419 | -4.067557 |
| O5  | 0.654058  | 1.027055 | -0.015384 |
| Fe6 | 0.365346  | 0.956162 | -1.618544 |
| N7  | -1.073812 | 2.380415 | -1.638500 |

|     |           |           |           |
|-----|-----------|-----------|-----------|
| N8  | -1.058209 | -0.443093 | -1.308204 |
| N9  | 1.756789  | -0.467906 | -1.900927 |
| N10 | 1.739617  | 2.368671  | -2.099579 |
| C11 | -0.892279 | 3.727361  | -1.776121 |
| C12 | -2.131483 | 4.431427  | -1.590878 |
| C13 | -3.084917 | 3.488278  | -1.361885 |
| C14 | -2.414444 | 2.210840  | -1.388331 |
| C15 | -2.378116 | -0.232283 | -1.064444 |
| C16 | -3.028015 | -1.464497 | -0.674597 |
| C17 | -2.068767 | -2.430365 | -0.664989 |
| C18 | -0.842845 | -1.770379 | -1.084436 |
| C19 | 1.556775  | -1.796738 | -1.692628 |
| C20 | 2.780387  | -2.520145 | -1.902703 |
| C21 | 3.739783  | -1.610313 | -2.235417 |
| C22 | 3.093582  | -0.307249 | -2.190567 |
| C23 | 3.086081  | 2.175896  | -2.213388 |
| C24 | 3.761204  | 3.450945  | -2.347429 |
| C25 | 2.798733  | 4.414914  | -2.348491 |
| C26 | 1.541359  | 3.728044  | -2.172507 |
| C27 | 0.321226  | 4.355110  | -2.036371 |
| H28 | 0.305923  | 5.435512  | -2.101803 |
| C29 | -3.028015 | 0.992691  | -1.146780 |
| H30 | -4.097123 | 1.000319  | -0.978108 |
| C31 | 0.372810  | -2.402700 | -1.279609 |
| H32 | 0.433620  | -3.458011 | -1.053921 |
| C33 | 3.715740  | 0.935013  | -2.255381 |
| H34 | 4.794753  | 0.966275  | -2.297392 |
| C35 | 1.156914  | 2.308910  | 3.297436  |
| H36 | 0.794690  | 1.538227  | 3.971906  |
| C37 | 0.330444  | 2.751482  | 2.282965  |
| H38 | -0.639223 | 2.301139  | 2.135638  |
| C39 | 0.786270  | 3.719761  | 1.373625  |
| H40 | 0.141958  | 4.030502  | 0.561899  |
| C41 | 2.046522  | 4.275194  | 1.505396  |
| H42 | 2.414318  | 5.025821  | 0.815109  |
| C43 | 2.841894  | 3.889095  | 2.584773  |
| O44 | 4.017588  | 4.557286  | 2.780425  |
| C45 | 4.631170  | 4.615084  | 4.023209  |
| O46 | 5.525762  | 5.434605  | 4.128511  |
| C47 | 4.154842  | 3.692753  | 5.027878  |
| C48 | 3.203375  | 2.748184  | 4.696434  |
| O49 | 2.912863  | 1.811318  | 5.596362  |
| H50 | 2.163890  | 1.265845  | 5.361106  |
| C51 | 2.426760  | 2.894405  | 3.481491  |
| H52 | -0.479796 | 2.506838  | -5.594224 |
| H53 | -2.237942 | 5.508128  | -1.617725 |
| H54 | -4.141264 | 3.648769  | -1.164731 |
| H55 | -4.084619 | -1.485599 | -0.440667 |
| H56 | -2.079987 | -3.495649 | -0.410665 |
| H57 | 2.844867  | -3.598441 | -1.851038 |
| H58 | 4.756707  | -1.903080 | -2.501021 |
| H59 | 4.838701  | 3.561600  | -2.405193 |
| H60 | 2.873012  | 5.496711  | -2.486677 |
| H61 | 4.190091  | 4.000638  | 6.098635  |

Warfarin 6-10 Transition State Doublet

|    |           |          |           |
|----|-----------|----------|-----------|
| C1 | -0.868807 | 1.778287 | -4.736388 |
| H2 | -1.578059 | 1.119668 | -5.244481 |
| H3 | -1.430982 | 2.368969 | -4.014611 |

|     |           |           |           |
|-----|-----------|-----------|-----------|
| S4  | 0.306754  | 0.670913  | -3.874259 |
| O5  | 0.841186  | 1.118699  | 0.308907  |
| Fe6 | 0.402381  | 1.066662  | -1.398049 |
| N7  | -1.040394 | 2.454798  | -1.470972 |
| N8  | -1.009839 | -0.360591 | -1.078811 |
| N9  | 1.799466  | -0.388954 | -1.662252 |
| N10 | 1.741995  | 2.459203  | -1.935099 |
| C11 | -0.894092 | 3.792870  | -1.734032 |
| C12 | -2.148104 | 4.477274  | -1.593717 |
| C13 | -3.085012 | 3.528957  | -1.315809 |
| C14 | -2.387736 | 2.269725  | -1.250675 |
| C15 | -2.345314 | -0.169570 | -0.894080 |
| C16 | -3.007620 | -1.420184 | -0.592124 |
| C17 | -2.045306 | -2.383910 | -0.589972 |
| C18 | -0.806996 | -1.702143 | -0.928125 |
| C19 | 1.591587  | -1.725414 | -1.516823 |
| C20 | 2.800269  | -2.452116 | -1.805279 |
| C21 | 3.753532  | -1.539669 | -2.134884 |
| C22 | 3.119083  | -0.231490 | -2.012513 |
| C23 | 3.087753  | 2.253383  | -2.067109 |
| C24 | 3.759028  | 3.516825  | -2.275514 |
| C25 | 2.796599  | 4.481890  | -2.316040 |
| C26 | 1.539694  | 3.808599  | -2.107592 |
| C27 | 0.303450  | 4.425104  | -2.048552 |
| H28 | 0.265217  | 5.496214  | -2.195865 |
| C29 | -2.997613 | 1.051034  | -1.000373 |
| H30 | -4.073461 | 1.051478  | -0.891720 |
| C31 | 0.401542  | -2.338794 | -1.146874 |
| H32 | 0.438630  | -3.410239 | -1.005453 |
| C33 | 3.723915  | 1.017087  | -2.110356 |
| H34 | 4.798061  | 1.059966  | -2.221981 |
| C35 | 1.283547  | 2.003952  | 2.800943  |
| H36 | 0.932248  | 1.196481  | 3.431859  |
| C37 | 0.528521  | 2.318929  | 1.618921  |
| H38 | -0.519058 | 2.040864  | 1.623270  |
| C39 | 0.873021  | 3.557676  | 0.985200  |
| H40 | 0.203994  | 3.946099  | 0.241684  |
| C41 | 2.029634  | 4.237481  | 1.280068  |
| H42 | 2.314023  | 5.130159  | 0.736500  |
| C43 | 2.810724  | 3.825599  | 2.362780  |
| O44 | 3.911951  | 4.568051  | 2.653364  |
| C45 | 4.518712  | 4.566865  | 3.902484  |
| O46 | 5.419536  | 5.373775  | 4.045097  |
| C47 | 4.006680  | 3.625481  | 4.869364  |
| C48 | 3.082368  | 2.669233  | 4.479914  |
| O49 | 2.741613  | 1.745283  | 5.375135  |
| H50 | 1.993749  | 1.207763  | 5.117503  |
| C51 | 2.415191  | 2.747379  | 3.179545  |
| H52 | -0.479672 | 2.465838  | -5.520726 |
| H53 | -2.259059 | 5.548589  | -1.630515 |
| H54 | -4.147945 | 3.673145  | -1.144796 |
| H55 | -4.074872 | -1.476854 | -0.420037 |
| H56 | -2.066095 | -3.461220 | -0.379271 |
| H57 | 2.850522  | -3.536143 | -1.821511 |
| H58 | 4.752579  | -1.843556 | -2.456130 |
| H59 | 4.835508  | 3.605107  | -2.367206 |
| H60 | 2.876084  | 5.554080  | -2.477887 |
| H61 | 4.065883  | 3.913257  | 5.954799  |

Warfarin 6-10 Transition State Quartet



|     |           |           |           |
|-----|-----------|-----------|-----------|
| C1  | -0.880562 | 1.776194  | -4.747095 |
| H2  | -1.582078 | 1.111669  | -5.256608 |
| H3  | -1.449155 | 2.363356  | -4.026413 |
| S4  | 0.301605  | 0.686387  | -3.880957 |
| O5  | 0.722746  | 1.208821  | 0.277177  |
| Fe6 | 0.416536  | 1.033375  | -1.407756 |
| N7  | -1.047624 | 2.434509  | -1.524089 |
| N8  | -1.002418 | -0.376502 | -1.093946 |
| N9  | 1.791661  | -0.388906 | -1.676555 |
| N10 | 1.759211  | 2.444973  | -1.932521 |
| C11 | -0.890659 | 3.775649  | -1.757212 |
| C12 | -2.140877 | 4.462522  | -1.603496 |
| C13 | -3.081129 | 3.513787  | -1.332983 |
| C14 | -2.388676 | 2.252302  | -1.288648 |
| C15 | -2.342624 | -0.178504 | -0.911527 |
| C16 | -3.001716 | -1.429157 | -0.599504 |
| C17 | -2.041600 | -2.392361 | -0.592751 |
| C18 | -0.801666 | -1.716451 | -0.935733 |
| C19 | 1.585197  | -1.733286 | -1.530928 |
| C20 | 2.794898  | -2.451014 | -1.817168 |
| C21 | 3.748887  | -1.536409 | -2.145226 |
| C22 | 3.120318  | -0.229632 | -2.026041 |
| C23 | 3.100400  | 2.247887  | -2.065163 |
| C24 | 3.766999  | 3.514362  | -2.270086 |
| C25 | 2.800267  | 4.474013  | -2.308283 |
| C26 | 1.545285  | 3.793191  | -2.101254 |
| C27 | 0.310795  | 4.409998  | -2.050881 |
| H28 | 0.275959  | 5.482413  | -2.183302 |
| C29 | -2.998207 | 1.033021  | -1.026571 |
| H30 | -4.071613 | 1.034922  | -0.905990 |
| C31 | 0.405482  | -2.354072 | -1.154757 |
| H32 | 0.448356  | -3.422536 | -1.008588 |
| C33 | 3.736242  | 1.009953  | -2.116042 |
| H34 | 4.809525  | 1.045228  | -2.223045 |
| C35 | 1.274678  | 2.020453  | 2.811580  |
| H36 | 0.919336  | 1.216469  | 3.443603  |
| C37 | 0.505806  | 2.355262  | 1.651354  |
| H38 | -0.536997 | 2.071179  | 1.662006  |
| C39 | 0.852898  | 3.597715  | 1.020739  |
| H40 | 0.177931  | 3.989587  | 0.284138  |
| C41 | 2.019086  | 4.260496  | 1.303629  |
| H42 | 2.302873  | 5.156359  | 0.766480  |
| C43 | 2.813105  | 3.834185  | 2.373768  |
| O44 | 3.917639  | 4.574367  | 2.662187  |
| C45 | 4.525656  | 4.568518  | 3.909184  |
| O46 | 5.426884  | 5.374730  | 4.053715  |
| C47 | 4.013775  | 3.623735  | 4.872567  |
| C48 | 3.089538  | 2.668551  | 4.480848  |
| O49 | 2.748398  | 1.743531  | 5.375637  |
| H50 | 1.995404  | 1.209501  | 5.121253  |
| C51 | 2.421036  | 2.751629  | 3.183149  |
| H52 | -0.487749 | 2.463739  | -5.528117 |
| H53 | -2.253376 | 5.535824  | -1.632538 |
| H54 | -4.143052 | 3.661226  | -1.151977 |
| H55 | -4.070121 | -1.483953 | -0.426846 |
| H56 | -2.060389 | -3.468291 | -0.379555 |
| H57 | 2.851858  | -3.534815 | -1.830004 |
| H58 | 4.748697  | -1.842319 | -2.460804 |
| H59 | 4.842583  | 3.606127  | -2.364094 |

|     |          |          |           |
|-----|----------|----------|-----------|
| H60 | 2.874277 | 5.547818 | -2.471668 |
| H61 | 4.068823 | 3.910985 | 5.958916  |

Warfarin 7-1 Reactant Complex Doublet

|     |           |           |           |
|-----|-----------|-----------|-----------|
| C1  | -0.969218 | 2.108680  | -4.769114 |
| H2  | -1.759384 | 1.562735  | -5.292464 |
| H3  | -1.459390 | 2.711251  | -4.007544 |
| S4  | 0.105627  | 0.846023  | -4.009838 |
| O5  | 0.566278  | 1.018441  | 0.071368  |
| Fe6 | 0.299443  | 1.013783  | -1.545643 |
| N7  | -1.115400 | 2.446408  | -1.564064 |
| N8  | -1.124370 | -0.388191 | -1.311215 |
| N9  | 1.705788  | -0.419116 | -1.832977 |
| N10 | 1.692566  | 2.418147  | -1.996619 |
| C11 | -0.933519 | 3.793642  | -1.716211 |
| C12 | -2.179362 | 4.496212  | -1.567073 |
| C13 | -3.135041 | 3.547049  | -1.362148 |
| C14 | -2.460052 | 2.271138  | -1.365902 |
| C15 | -2.455855 | -0.186894 | -1.103307 |
| C16 | -3.109110 | -1.434563 | -0.759600 |
| C17 | -2.138656 | -2.389631 | -0.740697 |
| C18 | -0.909512 | -1.716714 | -1.110048 |
| C19 | 1.509788  | -1.749691 | -1.623891 |
| C20 | 2.738351  | -2.471869 | -1.815562 |
| C21 | 3.696220  | -1.562771 | -2.149780 |
| C22 | 3.044395  | -0.263356 | -2.110789 |
| C23 | 3.036765  | 2.213335  | -2.130955 |
| C24 | 3.722263  | 3.473225  | -2.295179 |
| C25 | 2.767473  | 4.444891  | -2.300746 |
| C26 | 1.505789  | 3.775595  | -2.100215 |
| C27 | 0.283899  | 4.413821  | -1.980086 |
| H28 | 0.276173  | 5.493968  | -2.052580 |
| C29 | -3.090416 | 1.048041  | -1.173320 |
| H30 | -4.164756 | 1.071612  | -1.049422 |
| C31 | 0.312899  | -2.352219 | -1.261189 |
| H32 | 0.362988  | -3.408766 | -1.044140 |
| C33 | 3.665558  | 0.975835  | -2.188902 |
| H34 | 4.743474  | 1.006469  | -2.255687 |
| C35 | 0.804302  | 2.672338  | 3.511437  |
| H36 | 0.316976  | 2.092227  | 4.284779  |
| C37 | 0.208513  | 2.877800  | 2.286510  |
| H38 | -0.755845 | 2.445288  | 2.056405  |
| C39 | 0.880673  | 3.619557  | 1.302876  |
| H40 | 0.408933  | 3.754317  | 0.346340  |
| C41 | 2.138248  | 4.151988  | 1.531021  |
| H42 | 2.661160  | 4.708850  | 0.764956  |
| C43 | 2.724616  | 3.963542  | 2.780958  |
| O44 | 3.947879  | 4.533085  | 3.007660  |
| C45 | 4.539612  | 4.565217  | 4.259903  |
| O46 | 5.565378  | 5.199310  | 4.356033  |
| C47 | 3.865248  | 3.836874  | 5.326547  |
| C48 | 2.703307  | 3.141203  | 5.069899  |
| O49 | 2.009888  | 2.398243  | 5.940379  |
| H50 | 2.413138  | 2.304484  | 6.795461  |
| C51 | 2.073521  | 3.229699  | 3.776729  |
| H52 | -0.534948 | 2.797180  | -5.521726 |
| H53 | -2.282626 | 5.575967  | -1.596087 |
| H54 | -4.201257 | 3.681271  | -1.212163 |
| H55 | -4.170445 | -1.506461 | -0.543337 |

|     |           |           |           |
|-----|-----------|-----------|-----------|
| H56 | -2.129838 | -3.455688 | -0.489957 |
| H57 | 2.830613  | -3.547131 | -1.771470 |
| H58 | 4.708491  | -1.863158 | -2.429323 |
| H59 | 4.800277  | 3.556576  | -2.380067 |
| H60 | 2.853070  | 5.511737  | -2.474057 |
| H61 | 4.278642  | 4.005603  | 6.342569  |

Warfarin 7-1 Reactant Complex Quartet

|     |           |           |           |
|-----|-----------|-----------|-----------|
| C1  | -0.959763 | 2.114425  | -4.766097 |
| H2  | -1.750321 | 1.564170  | -5.283954 |
| H3  | -1.447695 | 2.716973  | -4.002525 |
| S4  | 0.117234  | 0.855913  | -4.006373 |
| O5  | 0.542993  | 1.034074  | 0.078646  |
| Fe6 | 0.301857  | 1.014060  | -1.537470 |
| N7  | -1.116094 | 2.446115  | -1.566333 |
| N8  | -1.124208 | -0.389294 | -1.304442 |
| N9  | 1.706705  | -0.418513 | -1.819756 |
| N10 | 1.690368  | 2.415759  | -2.000034 |
| C11 | -0.934194 | 3.792918  | -1.716282 |
| C12 | -2.181597 | 4.494083  | -1.569072 |
| C13 | -3.137318 | 3.544458  | -1.368551 |
| C14 | -2.462016 | 2.268777  | -1.371020 |
| C15 | -2.454638 | -0.187055 | -1.098134 |
| C16 | -3.108831 | -1.433837 | -0.752921 |
| C17 | -2.138662 | -2.391052 | -0.733286 |
| C18 | -0.908174 | -1.718086 | -1.102707 |
| C19 | 1.508388  | -1.750109 | -1.616040 |
| C20 | 2.737420  | -2.472123 | -1.809887 |
| C21 | 3.695632  | -1.562951 | -2.140081 |
| C22 | 3.046032  | -0.262427 | -2.098603 |
| C23 | 3.034223  | 2.211363  | -2.135671 |
| C24 | 3.717958  | 3.472129  | -2.303240 |
| C25 | 2.763974  | 4.442194  | -2.308639 |
| C26 | 1.501783  | 3.774947  | -2.106024 |
| C27 | 0.282266  | 4.414001  | -1.982100 |
| H28 | 0.275764  | 5.493732  | -2.055014 |
| C29 | -3.090991 | 1.047632  | -1.176954 |
| H30 | -4.166072 | 1.071291  | -1.057417 |
| C31 | 0.311401  | -2.354007 | -1.257455 |
| H32 | 0.360774  | -3.411888 | -1.045934 |
| C33 | 3.665825  | 0.975651  | -2.184483 |
| H34 | 4.743543  | 1.009745  | -2.253139 |
| C35 | 0.818761  | 2.684366  | 3.512204  |
| H36 | 0.331150  | 2.102849  | 4.283279  |
| C37 | 0.227338  | 2.890574  | 2.284305  |
| H38 | -0.734781 | 2.454656  | 2.052027  |
| C39 | 0.901036  | 3.631961  | 1.303471  |
| H40 | 0.434465  | 3.765938  | 0.343778  |
| C41 | 2.155848  | 4.169744  | 1.537084  |
| H42 | 2.679771  | 4.729983  | 0.774746  |
| C43 | 2.738892  | 3.979718  | 2.788580  |
| O44 | 3.961794  | 4.549755  | 3.019398  |
| C45 | 4.553014  | 4.575232  | 4.272717  |
| O46 | 5.580012  | 5.204412  | 4.371333  |
| C47 | 3.875398  | 3.843824  | 5.334886  |
| C48 | 2.716753  | 3.148395  | 5.073714  |
| O49 | 2.023560  | 2.397481  | 5.938248  |
| H50 | 2.433231  | 2.293399  | 6.790772  |
| C51 | 2.087699  | 3.242343  | 3.781410  |

|     |           |           |           |
|-----|-----------|-----------|-----------|
| H52 | -0.530036 | 2.802129  | -5.523000 |
| H53 | -2.284120 | 5.573347  | -1.596147 |
| H54 | -4.203736 | 3.678408  | -1.215046 |
| H55 | -4.171036 | -1.506501 | -0.540337 |
| H56 | -2.131247 | -3.456887 | -0.483793 |
| H57 | 2.827317  | -3.548421 | -1.769808 |
| H58 | 4.705332  | -1.866298 | -2.422558 |
| H59 | 4.796865  | 3.553789  | -2.384126 |
| H60 | 2.849926  | 5.509056  | -2.479333 |
| H61 | 4.286591  | 4.009690  | 6.353821  |

Warfarin 7-1 Transition State Doublet

|     |           |           |           |
|-----|-----------|-----------|-----------|
| C1  | -0.961739 | 2.079173  | -4.679250 |
| H2  | -1.732719 | 1.503675  | -5.198005 |
| H3  | -1.470219 | 2.689127  | -3.935662 |
| S4  | 0.119634  | 0.839102  | -3.867022 |
| O5  | 0.840141  | 1.303820  | 0.256301  |
| Fe6 | 0.362811  | 1.150384  | -1.446308 |
| N7  | -1.063654 | 2.544915  | -1.465134 |
| N8  | -1.044695 | -0.280676 | -1.095667 |
| N9  | 1.766484  | -0.325381 | -1.677712 |
| N10 | 1.715629  | 2.521621  | -1.956332 |
| C11 | -0.902217 | 3.897311  | -1.664269 |
| C12 | -2.163799 | 4.575416  | -1.543178 |
| C13 | -3.104442 | 3.613116  | -1.324923 |
| C14 | -2.406072 | 2.353624  | -1.275539 |
| C15 | -2.391152 | -0.096654 | -0.941931 |
| C16 | -3.054243 | -1.359487 | -0.672618 |
| C17 | -2.083412 | -2.313407 | -0.663265 |
| C18 | -0.844663 | -1.619552 | -0.961820 |
| C19 | 1.563526  | -1.661105 | -1.497299 |
| C20 | 2.777918  | -2.393509 | -1.745822 |
| C21 | 3.730431  | -1.489275 | -2.091298 |
| C22 | 3.088897  | -0.181526 | -2.014733 |
| C23 | 3.060184  | 2.298954  | -2.097232 |
| C24 | 3.747493  | 3.551905  | -2.278088 |
| C25 | 2.799530  | 4.530021  | -2.281488 |
| C26 | 1.534769  | 3.874141  | -2.067047 |
| C27 | 0.308191  | 4.517175  | -1.939510 |
| H28 | 0.298330  | 5.595069  | -2.036513 |
| C29 | -3.029199 | 1.128667  | -1.049668 |
| H30 | -4.107264 | 1.145966  | -0.958621 |
| C31 | 0.369718  | -2.263872 | -1.146881 |
| H32 | 0.402536  | -3.331921 | -0.987250 |
| C33 | 3.693934  | 1.063709  | -2.141764 |
| H34 | 4.768980  | 1.102700  | -2.246794 |
| C35 | 0.613486  | 2.477215  | 3.482907  |
| H36 | 0.088924  | 2.083332  | 4.343783  |
| C37 | 0.034218  | 2.490815  | 2.249266  |
| H38 | -0.973065 | 2.126043  | 2.098708  |
| C39 | 0.775793  | 2.898753  | 1.080215  |
| H40 | 0.195880  | 3.349935  | 0.292238  |
| C41 | 2.084164  | 3.478466  | 1.288352  |
| H42 | 2.639363  | 3.884778  | 0.454003  |
| C43 | 2.607280  | 3.546795  | 2.565050  |
| O44 | 3.817695  | 4.174362  | 2.755954  |
| C45 | 4.367228  | 4.407764  | 4.017991  |
| O46 | 5.349841  | 5.105515  | 4.057236  |
| C47 | 3.712229  | 3.778434  | 5.159196  |

|     |           |           |           |
|-----|-----------|-----------|-----------|
| C48 | 2.542610  | 3.069898  | 4.964475  |
| O49 | 1.848463  | 2.412812  | 5.907417  |
| H50 | 2.259932  | 2.397944  | 6.762289  |
| C51 | 1.916971  | 3.014856  | 3.674902  |
| H52 | -0.536740 | 2.765604  | -5.449335 |
| H53 | -2.284385 | 5.647084  | -1.592200 |
| H54 | -4.177948 | 3.718933  | -1.198155 |
| H55 | -4.125538 | -1.458382 | -0.521383 |
| H56 | -2.087259 | -3.393596 | -0.460723 |
| H57 | 2.850529  | -3.474495 | -1.747442 |
| H58 | 4.723865  | -1.808845 | -2.408554 |
| H59 | 4.825507  | 3.612576  | -2.366099 |
| H60 | 2.883021  | 5.587954  | -2.472624 |
| H61 | 4.170898  | 3.979570  | 6.169759  |

Warfarin 7-1 Transition State Quartet

|     |           |           |           |
|-----|-----------|-----------|-----------|
| C1  | -0.974832 | 2.078011  | -4.670189 |
| H2  | -1.735856 | 1.487103  | -5.183447 |
| H3  | -1.490888 | 2.686485  | -3.930580 |
| S4  | 0.138604  | 0.874994  | -3.848021 |
| O5  | 0.727046  | 1.369380  | 0.225209  |
| Fe6 | 0.385435  | 1.110175  | -1.467795 |
| N7  | -1.058243 | 2.521557  | -1.506807 |
| N8  | -1.027450 | -0.299969 | -1.119349 |
| N9  | 1.765001  | -0.325474 | -1.691892 |
| N10 | 1.751355  | 2.509902  | -1.922994 |
| C11 | -0.885086 | 3.876323  | -1.682585 |
| C12 | -2.146187 | 4.554925  | -1.552980 |
| C13 | -3.089877 | 3.592317  | -1.340407 |
| C14 | -2.398027 | 2.330300  | -1.307868 |
| C15 | -2.379125 | -0.107263 | -0.965483 |
| C16 | -3.039706 | -1.368563 | -0.684513 |
| C17 | -2.071012 | -2.324584 | -0.669873 |
| C18 | -0.828678 | -1.639767 | -0.975814 |
| C19 | 1.560777  | -1.670247 | -1.509719 |
| C20 | 2.778874  | -2.390575 | -1.757551 |
| C21 | 3.731772  | -1.482278 | -2.104187 |
| C22 | 3.097339  | -0.175168 | -2.026724 |
| C23 | 3.087843  | 2.293275  | -2.073607 |
| C24 | 3.768431  | 3.550051  | -2.258973 |
| C25 | 2.813798  | 4.521506  | -2.263035 |
| C26 | 1.552541  | 3.857117  | -2.042193 |
| C27 | 0.325864  | 4.499692  | -1.934869 |
| H28 | 0.316009  | 5.576862  | -2.027651 |
| C29 | -3.022092 | 1.109324  | -1.076710 |
| H30 | -4.097930 | 1.126033  | -0.975360 |
| C31 | 0.381967  | -2.283326 | -1.156040 |
| H32 | 0.423569  | -3.348232 | -0.984449 |
| C33 | 3.717619  | 1.056299  | -2.139244 |
| H34 | 4.791871  | 1.086701  | -2.243410 |
| C35 | 0.615816  | 2.480168  | 3.487883  |
| H36 | 0.095638  | 2.081178  | 4.347692  |
| C37 | 0.025096  | 2.510178  | 2.264358  |
| H38 | -0.984032 | 2.151137  | 2.117610  |
| C39 | 0.752364  | 2.933474  | 1.084472  |
| H40 | 0.171598  | 3.405811  | 0.312510  |
| C41 | 2.074592  | 3.491832  | 1.292412  |
| H42 | 2.617623  | 3.913186  | 0.457232  |
| C43 | 2.608744  | 3.544010  | 2.563124  |

|     |           |           |           |
|-----|-----------|-----------|-----------|
| O44 | 3.820868  | 4.163594  | 2.752826  |
| C45 | 4.375432  | 4.401222  | 4.015330  |
| O46 | 5.357040  | 5.098097  | 4.048522  |
| C47 | 3.722763  | 3.774727  | 5.160158  |
| C48 | 2.552725  | 3.062996  | 4.964925  |
| O49 | 1.860257  | 2.405452  | 5.907976  |
| H50 | 2.267440  | 2.394247  | 6.765304  |
| C51 | 1.925070  | 3.009900  | 3.678226  |
| H52 | -0.547334 | 2.762080  | -5.443079 |
| H53 | -2.271797 | 5.627808  | -1.593713 |
| H54 | -4.162687 | 3.702037  | -1.204852 |
| H55 | -4.110557 | -1.465427 | -0.529288 |
| H56 | -2.076280 | -3.403295 | -0.461594 |
| H57 | 2.855454  | -3.471127 | -1.755322 |
| H58 | 4.726385  | -1.802070 | -2.417763 |
| H59 | 4.844889  | 3.615139  | -2.354126 |
| H60 | 2.889421  | 5.580963  | -2.459478 |
| H61 | 4.180246  | 3.979482  | 6.172851  |

Warfarin 7-2 Reactant Complex Doublet

|     |           |           |           |
|-----|-----------|-----------|-----------|
| C1  | -0.949398 | 2.374224  | -4.699381 |
| H2  | -1.924088 | 1.961798  | -4.970601 |
| H3  | -1.137200 | 3.126385  | -3.935011 |
| S4  | 0.063891  | 1.005172  | -4.028980 |
| O5  | 0.578609  | 0.919393  | 0.075492  |
| Fe6 | 0.298376  | 0.998027  | -1.535384 |
| N7  | -1.112829 | 2.432787  | -1.505897 |
| N8  | -1.127301 | -0.404546 | -1.348395 |
| N9  | 1.698169  | -0.427161 | -1.862122 |
| N10 | 1.695279  | 2.407452  | -1.962152 |
| C11 | -0.929855 | 3.777318  | -1.660657 |
| C12 | -2.172785 | 4.480470  | -1.515810 |
| C13 | -3.131611 | 3.536782  | -1.305480 |
| C14 | -2.463023 | 2.258260  | -1.314063 |
| C15 | -2.456604 | -0.204923 | -1.145679 |
| C16 | -3.114917 | -1.455804 | -0.831494 |
| C17 | -2.142922 | -2.411016 | -0.796576 |
| C18 | -0.911345 | -1.734823 | -1.146451 |
| C19 | 1.505715  | -1.756136 | -1.643231 |
| C20 | 2.733969  | -2.476941 | -1.833049 |
| C21 | 3.689077  | -1.572959 | -2.176757 |
| C22 | 3.039909  | -0.269930 | -2.136048 |
| C23 | 3.036986  | 2.205702  | -2.117063 |
| C24 | 3.717320  | 3.470561  | -2.282630 |
| C25 | 2.762577  | 4.440399  | -2.275369 |
| C26 | 1.504390  | 3.768354  | -2.059857 |
| C27 | 0.285901  | 4.401520  | -1.934989 |
| H28 | 0.274739  | 5.480023  | -2.026794 |
| C29 | -3.093551 | 1.033146  | -1.163523 |
| H30 | -4.167319 | 1.045752  | -1.026218 |
| C31 | 0.312759  | -2.365431 | -1.278042 |
| H32 | 0.368846  | -3.420738 | -1.053883 |
| C33 | 3.663471  | 0.967553  | -2.200880 |
| H34 | 4.740832  | 0.993927  | -2.282157 |
| C35 | 0.662904  | 2.559998  | 3.526427  |
| H36 | 0.227394  | 1.974637  | 4.325088  |
| C37 | -0.003019 | 2.772249  | 2.339065  |
| H38 | -0.982700 | 2.344060  | 2.166905  |
| C39 | 0.606783  | 3.527231  | 1.328490  |

|     |           |           |           |
|-----|-----------|-----------|-----------|
| H40 | 0.076542  | 3.675140  | 0.406063  |
| C41 | 1.885228  | 4.038618  | 1.474722  |
| H42 | 2.371897  | 4.588553  | 0.677593  |
| C43 | 2.525527  | 3.875759  | 2.699101  |
| O44 | 3.740248  | 4.477956  | 2.869330  |
| C45 | 4.345939  | 4.603341  | 4.112823  |
| O46 | 5.359148  | 5.260783  | 4.147210  |
| C47 | 3.694742  | 3.929846  | 5.228416  |
| C48 | 2.576675  | 3.155155  | 5.021464  |
| O49 | 1.923224  | 2.430064  | 5.933521  |
| H50 | 2.350020  | 2.375295  | 6.782146  |
| C51 | 1.928359  | 3.151741  | 3.733191  |
| H52 | -0.569574 | 2.913410  | -5.598467 |
| H53 | -2.267375 | 5.556418  | -1.568063 |
| H54 | -4.195381 | 3.688291  | -1.163057 |
| H55 | -4.186531 | -1.521376 | -0.682480 |
| H56 | -2.133887 | -3.474321 | -0.538352 |
| H57 | 2.816520  | -3.551723 | -1.769010 |
| H58 | 4.697779  | -1.881595 | -2.461834 |
| H59 | 4.793065  | 3.557925  | -2.383687 |
| H60 | 2.839518  | 5.508197  | -2.462616 |
| H61 | 4.084316  | 4.193546  | 6.235541  |

Warfarin 7-2 Reactant Complex Quartet

|     |           |           |           |
|-----|-----------|-----------|-----------|
| C1  | -0.934570 | 2.378069  | -4.697257 |
| H2  | -1.906872 | 1.953855  | -4.959727 |
| H3  | -1.123998 | 3.131834  | -3.934640 |
| S4  | 0.095840  | 1.025214  | -4.023495 |
| O5  | 0.555867  | 0.939516  | 0.084132  |
| Fe6 | 0.305332  | 0.996226  | -1.527357 |
| N7  | -1.111097 | 2.430248  | -1.511800 |
| N8  | -1.122117 | -0.408953 | -1.344967 |
| N9  | 1.705049  | -0.428997 | -1.846103 |
| N10 | 1.697137  | 2.403886  | -1.960803 |
| C11 | -0.928732 | 3.772994  | -1.663977 |
| C12 | -2.173316 | 4.475154  | -1.519842 |
| C13 | -3.131784 | 3.530571  | -1.313218 |
| C14 | -2.461381 | 2.251770  | -1.322246 |
| C15 | -2.451278 | -0.209426 | -1.143047 |
| C16 | -3.109372 | -1.460387 | -0.827656 |
| C17 | -2.138704 | -2.416417 | -0.793512 |
| C18 | -0.905858 | -1.741107 | -1.143823 |
| C19 | 1.510949  | -1.759323 | -1.636008 |
| C20 | 2.739280  | -2.480006 | -1.828889 |
| C21 | 3.695219  | -1.574600 | -2.167836 |
| C22 | 3.047351  | -0.271542 | -2.121620 |
| C23 | 3.037322  | 2.202563  | -2.116520 |
| C24 | 3.716690  | 3.467771  | -2.285439 |
| C25 | 2.761438  | 4.437018  | -2.278327 |
| C26 | 1.503503  | 3.765871  | -2.061355 |
| C27 | 0.286782  | 4.399448  | -1.936371 |
| H28 | 0.275790  | 5.477826  | -2.026438 |
| C29 | -3.090082 | 1.029124  | -1.169891 |
| H30 | -4.164587 | 1.042683  | -1.036288 |
| C31 | 0.316256  | -2.371171 | -1.279606 |
| H32 | 0.371557  | -3.428765 | -1.066127 |
| C33 | 3.668396  | 0.966721  | -2.192949 |
| H34 | 4.744844  | 0.999882  | -2.276710 |
| C35 | 0.668052  | 2.574740  | 3.529239  |

|     |           |           |           |
|-----|-----------|-----------|-----------|
| H36 | 0.235521  | 1.983200  | 4.325151  |
| C37 | 0.002414  | 2.789494  | 2.341825  |
| H38 | -0.973991 | 2.356951  | 2.167861  |
| C39 | 0.612224  | 3.548671  | 1.334590  |
| H40 | 0.083644  | 3.698237  | 0.410455  |
| C41 | 1.888764  | 4.064841  | 1.484090  |
| H42 | 2.374501  | 4.620737  | 0.692172  |
| C43 | 2.528671  | 3.896738  | 2.709299  |
| O44 | 3.744206  | 4.496317  | 2.880980  |
| C45 | 4.353853  | 4.610370  | 4.122893  |
| O46 | 5.372133  | 5.257071  | 4.159099  |
| C47 | 3.698789  | 3.935764  | 5.237755  |
| C48 | 2.580137  | 3.162217  | 5.026858  |
| O49 | 1.929272  | 2.431127  | 5.937371  |
| H50 | 2.358232  | 2.368231  | 6.783703  |
| C51 | 1.932601  | 3.167136  | 3.740405  |
| H52 | -0.564281 | 2.916473  | -5.600801 |
| H53 | -2.267257 | 5.550598  | -1.567512 |
| H54 | -4.195284 | 3.681533  | -1.166395 |
| H55 | -4.181517 | -1.526943 | -0.679281 |
| H56 | -2.128634 | -3.480500 | -0.535877 |
| H57 | 2.821933  | -3.556127 | -1.773462 |
| H58 | 4.702578  | -1.882724 | -2.457881 |
| H59 | 4.793249  | 3.557263  | -2.378541 |
| H60 | 2.839368  | 5.504700  | -2.462735 |
| H61 | 4.087116  | 4.195837  | 6.244488  |

Warfarin 7-2 Transition State Doublet

|     |           |           |           |
|-----|-----------|-----------|-----------|
| C1  | -0.960266 | 2.335495  | -4.648805 |
| H2  | -1.915858 | 1.898003  | -4.945539 |
| H3  | -1.185139 | 3.086872  | -3.895626 |
| S4  | 0.054690  | 0.977419  | -3.929057 |
| O5  | 0.785198  | 1.264656  | 0.250384  |
| Fe6 | 0.345250  | 1.134874  | -1.455671 |
| N7  | -1.076813 | 2.524670  | -1.450412 |
| N8  | -1.055759 | -0.305638 | -1.138415 |
| N9  | 1.751392  | -0.337906 | -1.704397 |
| N10 | 1.707018  | 2.505465  | -1.948114 |
| C11 | -0.910168 | 3.874738  | -1.633878 |
| C12 | -2.166480 | 4.553771  | -1.506326 |
| C13 | -3.112491 | 3.597535  | -1.289692 |
| C14 | -2.422514 | 2.333442  | -1.259125 |
| C15 | -2.399859 | -0.123490 | -0.990180 |
| C16 | -3.064994 | -1.387358 | -0.736479 |
| C17 | -2.092457 | -2.341610 | -0.709609 |
| C18 | -0.852735 | -1.645373 | -0.994789 |
| C19 | 1.554567  | -1.672290 | -1.512938 |
| C20 | 2.768199  | -2.404997 | -1.759912 |
| C21 | 3.719087  | -1.502655 | -2.117124 |
| C22 | 3.076523  | -0.193578 | -2.039877 |
| C23 | 3.050263  | 2.286099  | -2.097207 |
| C24 | 3.734937  | 3.542454  | -2.273192 |
| C25 | 2.786588  | 4.519518  | -2.267017 |
| C26 | 1.523631  | 3.860246  | -2.051216 |
| C27 | 0.300743  | 4.498564  | -1.914386 |
| H28 | 0.288859  | 5.575528  | -2.018339 |
| C29 | -3.042254 | 1.104133  | -1.062836 |
| H30 | -4.119455 | 1.110145  | -0.958840 |
| C31 | 0.364973  | -2.283873 | -1.158431 |



|     |           |           |           |
|-----|-----------|-----------|-----------|
| H32 | 0.407026  | -3.350059 | -0.990238 |
| C33 | 3.683929  | 1.050074  | -2.157527 |
| H34 | 4.757803  | 1.089008  | -2.272575 |
| C35 | 0.558129  | 2.385249  | 3.491470  |
| H36 | 0.075749  | 1.961667  | 4.362286  |
| C37 | -0.051839 | 2.391782  | 2.273568  |
| H38 | -1.053353 | 2.003003  | 2.141956  |
| C39 | 0.647004  | 2.844168  | 1.094942  |
| H40 | 0.027823  | 3.277693  | 0.326763  |
| C41 | 1.932941  | 3.471608  | 1.276961  |
| H42 | 2.453889  | 3.909477  | 0.436255  |
| C43 | 2.478939  | 3.554066  | 2.542506  |
| O44 | 3.662052  | 4.232968  | 2.706038  |
| C45 | 4.214231  | 4.510981  | 3.956363  |
| O46 | 5.183895  | 5.227385  | 3.965408  |
| C47 | 3.578449  | 3.899457  | 5.118196  |
| C48 | 2.457945  | 3.108063  | 4.949541  |
| O49 | 1.804451  | 2.439055  | 5.907261  |
| H50 | 2.219066  | 2.451828  | 6.762821  |
| C51 | 1.835058  | 2.988208  | 3.661907  |
| H52 | -0.576004 | 2.883582  | -5.548456 |
| H53 | -2.273511 | 5.621641  | -1.570091 |
| H54 | -4.181918 | 3.725357  | -1.158212 |
| H55 | -4.142822 | -1.475207 | -0.644142 |
| H56 | -2.092366 | -3.419406 | -0.499356 |
| H57 | 2.834515  | -3.485586 | -1.743384 |
| H58 | 4.709047  | -1.828232 | -2.437475 |
| H59 | 4.811454  | 3.609548  | -2.372057 |
| H60 | 2.865257  | 5.578862  | -2.463728 |
| H61 | 4.001144  | 4.181725  | 6.119814  |

Warfarin 7-2 Transition State Quartet

|     |           |           |           |
|-----|-----------|-----------|-----------|
| C1  | -0.977078 | 2.334139  | -4.640988 |
| H2  | -1.922669 | 1.882998  | -4.941192 |
| H3  | -1.213032 | 3.088375  | -3.894207 |
| S4  | 0.063973  | 1.003083  | -3.904615 |
| O5  | 0.693369  | 1.334220  | 0.211708  |
| Fe6 | 0.368168  | 1.098004  | -1.481624 |
| N7  | -1.073633 | 2.501052  | -1.482670 |
| N8  | -1.038025 | -0.325486 | -1.161126 |
| N9  | 1.749533  | -0.338784 | -1.719880 |
| N10 | 1.740105  | 2.494224  | -1.920336 |
| C11 | -0.894951 | 3.854033  | -1.644928 |
| C12 | -2.150934 | 4.532377  | -1.510521 |
| C13 | -3.099914 | 3.575886  | -1.299428 |
| C14 | -2.414578 | 2.309966  | -1.283342 |
| C15 | -2.388877 | -0.135720 | -1.008899 |
| C16 | -3.049237 | -1.400199 | -0.745036 |
| C17 | -2.079373 | -2.355458 | -0.717091 |
| C18 | -0.836859 | -1.666941 | -1.011038 |
| C19 | 1.552395  | -1.684039 | -1.528825 |
| C20 | 2.770645  | -2.403093 | -1.772724 |
| C21 | 3.720580  | -1.498927 | -2.125445 |
| C22 | 3.086325  | -0.190398 | -2.050060 |
| C23 | 3.075274  | 2.278973  | -2.077747 |
| C24 | 3.753429  | 3.539705  | -2.257712 |
| C25 | 2.798815  | 4.510496  | -2.251256 |
| C26 | 1.540014  | 3.841782  | -2.029472 |
| C27 | 0.314713  | 4.479463  | -1.907002 |

|     |           |           |           |
|-----|-----------|-----------|-----------|
| H28 | 0.302224  | 5.555717  | -2.008890 |
| C29 | -3.034617 | 1.080794  | -1.080942 |
| H30 | -4.109628 | 1.085596  | -0.964274 |
| C31 | 0.376526  | -2.304293 | -1.174088 |
| H32 | 0.425296  | -3.369121 | -1.001560 |
| C33 | 3.705497  | 1.043251  | -2.154693 |
| H34 | 4.779199  | 1.072825  | -2.267191 |
| C35 | 0.565365  | 2.381082  | 3.502770  |
| H36 | 0.081535  | 1.958133  | 4.375060  |
| C37 | -0.054797 | 2.400339  | 2.294052  |
| H38 | -1.057855 | 2.016125  | 2.167560  |
| C39 | 0.624776  | 2.877836  | 1.109110  |
| H40 | 0.000847  | 3.331115  | 0.358309  |
| C41 | 1.917422  | 3.501190  | 1.293986  |
| H42 | 2.416544  | 3.971184  | 0.458708  |
| C43 | 2.472704  | 3.565231  | 2.553753  |
| O44 | 3.647400  | 4.255325  | 2.718362  |
| C45 | 4.211842  | 4.522732  | 3.969074  |
| O46 | 5.181630  | 5.235109  | 3.974828  |
| C47 | 3.581376  | 3.904806  | 5.130477  |
| C48 | 2.466679  | 3.104949  | 4.959285  |
| O49 | 1.817146  | 2.430127  | 5.916265  |
| H50 | 2.231856  | 2.449781  | 6.773784  |
| C51 | 1.843107  | 2.982783  | 3.674624  |
| H52 | -0.587026 | 2.880364  | -5.542988 |
| H53 | -2.262639 | 5.601833  | -1.568284 |
| H54 | -4.169276 | 3.705780  | -1.163899 |
| H55 | -4.126513 | -1.485887 | -0.641591 |
| H56 | -2.077926 | -3.432885 | -0.502270 |
| H57 | 2.843922  | -3.484854 | -1.754916 |
| H58 | 4.715671  | -1.823825 | -2.440130 |
| H59 | 4.828524  | 3.610335  | -2.358514 |
| H60 | 2.869929  | 5.571016  | -2.450486 |
| H61 | 4.004121  | 4.189663  | 6.133175  |

Warfarin 7-3 Reactant Complex Doublet

|     |           |           |           |
|-----|-----------|-----------|-----------|
| C1  | -0.873903 | 2.261828  | -4.740170 |
| H2  | -1.780796 | 1.774671  | -5.112589 |
| H3  | -1.196445 | 2.952773  | -3.965275 |
| S4  | 0.196566  | 0.963444  | -4.041822 |
| O5  | 0.552815  | 0.980176  | 0.061879  |
| Fe6 | 0.309647  | 1.026116  | -1.555357 |
| N7  | -1.108890 | 2.455108  | -1.566469 |
| N8  | -1.115365 | -0.385171 | -1.364055 |
| N9  | 1.718739  | -0.394496 | -1.838550 |
| N10 | 1.706213  | 2.444777  | -1.959597 |
| C11 | -0.927219 | 3.801078  | -1.711660 |
| C12 | -2.173915 | 4.499926  | -1.574461 |
| C13 | -3.133868 | 3.553194  | -1.391060 |
| C14 | -2.460406 | 2.276012  | -1.390027 |
| C15 | -2.443604 | -0.183604 | -1.155787 |
| C16 | -3.097722 | -1.427649 | -0.807045 |
| C17 | -2.127173 | -2.385042 | -0.780207 |
| C18 | -0.895191 | -1.712381 | -1.146289 |
| C19 | 1.527923  | -1.725349 | -1.629741 |
| C20 | 2.762437  | -2.440522 | -1.814283 |
| C21 | 3.716368  | -1.526137 | -2.146334 |
| C22 | 3.059465  | -0.228553 | -2.098182 |
| C23 | 3.051645  | 2.247311  | -2.082352 |

|     |           |           |           |
|-----|-----------|-----------|-----------|
| C24 | 3.730861  | 3.514610  | -2.243640 |
| C25 | 2.773974  | 4.479223  | -2.257484 |
| C26 | 1.512959  | 3.803819  | -2.066418 |
| C27 | 0.288998  | 4.431277  | -1.964726 |
| H28 | 0.273939  | 5.511029  | -2.045802 |
| C29 | -3.084060 | 1.051649  | -1.216516 |
| H30 | -4.158360 | 1.063604  | -1.089955 |
| C31 | 0.332799  | -2.339365 | -1.273450 |
| H32 | 0.391262  | -3.395603 | -1.049360 |
| C33 | 3.681746  | 1.011531  | -2.142842 |
| H34 | 4.761267  | 1.042258  | -2.191420 |
| C35 | 0.673159  | 2.673602  | 3.491403  |
| H36 | 0.216005  | 2.103296  | 4.289717  |
| C37 | 0.033740  | 2.871697  | 2.287211  |
| H38 | -0.943372 | 2.444363  | 2.099099  |
| C39 | 0.670385  | 3.603027  | 1.275865  |
| H40 | 0.159451  | 3.738520  | 0.342709  |
| C41 | 1.947432  | 4.112805  | 1.440178  |
| H42 | 2.453322  | 4.649408  | 0.647240  |
| C43 | 2.565416  | 3.959270  | 2.680341  |
| O44 | 3.783654  | 4.546140  | 2.862886  |
| C45 | 4.358437  | 4.696660  | 4.117904  |
| O46 | 5.370681  | 5.354399  | 4.164434  |
| C47 | 3.682153  | 4.041114  | 5.231583  |
| C48 | 2.568299  | 3.258798  | 5.007750  |
| O49 | 1.907317  | 2.540627  | 5.922488  |
| H50 | 2.388456  | 2.401910  | 6.731958  |
| C51 | 1.940381  | 3.251410  | 3.711482  |
| H52 | -0.475328 | 2.872996  | -5.574849 |
| H53 | -2.278029 | 5.575253  | -1.594448 |
| H54 | -4.198950 | 3.716612  | -1.271595 |
| H55 | -4.162426 | -1.491513 | -0.599421 |
| H56 | -2.125679 | -3.449659 | -0.528793 |
| H57 | 2.840305  | -3.515771 | -1.756438 |
| H58 | 4.731329  | -1.806696 | -2.439402 |
| H59 | 4.807603  | 3.603329  | -2.341717 |
| H60 | 2.850823  | 5.548584  | -2.436113 |
| H61 | 4.014344  | 4.346341  | 6.246288  |

Warfarin 7-3 Reactant Complex Quartet

|     |           |           |           |
|-----|-----------|-----------|-----------|
| C1  | -0.860496 | 2.266718  | -4.736471 |
| H2  | -1.764700 | 1.766753  | -5.098490 |
| H3  | -1.184666 | 2.959520  | -3.962975 |
| S4  | 0.226560  | 0.986000  | -4.035919 |
| O5  | 0.526997  | 0.982993  | 0.068526  |
| Fe6 | 0.315898  | 1.023521  | -1.549233 |
| N7  | -1.106982 | 2.452773  | -1.569093 |
| N8  | -1.112129 | -0.388426 | -1.369204 |
| N9  | 1.723390  | -0.395180 | -1.829269 |
| N10 | 1.712351  | 2.441107  | -1.950265 |
| C11 | -0.924740 | 3.797281  | -1.711201 |
| C12 | -2.172275 | 4.496536  | -1.573838 |
| C13 | -3.132662 | 3.549161  | -1.392808 |
| C14 | -2.459629 | 2.271888  | -1.394245 |
| C15 | -2.439615 | -0.187610 | -1.161288 |
| C16 | -3.093266 | -1.430832 | -0.809181 |
| C17 | -2.123091 | -2.387909 | -0.781238 |
| C18 | -0.891493 | -1.716938 | -1.148834 |
| C19 | 1.530877  | -1.726954 | -1.627426 |

|     |           |           |           |
|-----|-----------|-----------|-----------|
| C20 | 2.764590  | -2.442303 | -1.813431 |
| C21 | 3.719612  | -1.528127 | -2.141545 |
| C22 | 3.065563  | -0.229246 | -2.089369 |
| C23 | 3.056049  | 2.245153  | -2.073927 |
| C24 | 3.733869  | 3.512675  | -2.238830 |
| C25 | 2.775654  | 4.477081  | -2.253956 |
| C26 | 1.515371  | 3.801441  | -2.060827 |
| C27 | 0.292331  | 4.429272  | -1.961427 |
| H28 | 0.277615  | 5.508401  | -2.041875 |
| C29 | -3.082347 | 1.048167  | -1.226084 |
| H30 | -4.157463 | 1.056651  | -1.104839 |
| C31 | 0.334829  | -2.343126 | -1.277543 |
| H32 | 0.392765  | -3.400454 | -1.061002 |
| C33 | 3.688721  | 1.008895  | -2.133065 |
| H34 | 4.767855  | 1.039272  | -2.181781 |
| C35 | 0.665255  | 2.671104  | 3.500202  |
| H36 | 0.212659  | 2.098950  | 4.298746  |
| C37 | 0.021005  | 2.870798  | 2.298291  |
| H38 | -0.955255 | 2.442269  | 2.113450  |
| C39 | 0.653678  | 3.604539  | 1.286943  |
| H40 | 0.138193  | 3.740129  | 0.354496  |
| C41 | 1.931576  | 4.114165  | 1.446320  |
| H42 | 2.433224  | 4.652282  | 0.652137  |
| C43 | 2.552673  | 3.959121  | 2.683192  |
| O44 | 3.773597  | 4.546850  | 2.862842  |
| C45 | 4.352402  | 4.697129  | 4.116923  |
| O46 | 5.362053  | 5.354761  | 4.160567  |
| C47 | 3.678482  | 4.039091  | 5.230794  |
| C48 | 2.565153  | 3.257166  | 5.011225  |
| O49 | 1.906392  | 2.537398  | 5.926419  |
| H50 | 2.387122  | 2.402048  | 6.737234  |
| C51 | 1.933669  | 3.250950  | 3.716745  |
| H52 | -0.471375 | 2.875151  | -5.576968 |
| H53 | -2.276448 | 5.571639  | -1.592242 |
| H54 | -4.197662 | 3.713098  | -1.271450 |
| H55 | -4.157413 | -1.493317 | -0.598000 |
| H56 | -2.118698 | -3.452100 | -0.528587 |
| H57 | 2.842452  | -3.518003 | -1.757235 |
| H58 | 4.733312  | -1.810698 | -2.434815 |
| H59 | 4.810106  | 3.603614  | -2.338654 |
| H60 | 2.852555  | 5.546215  | -2.433225 |
| H61 | 4.012751  | 4.345830  | 6.244965  |

Warfarin 7-3 Transition State Doublet

|     |           |           |           |
|-----|-----------|-----------|-----------|
| C1  | -0.887848 | 2.207359  | -4.681121 |
| H2  | -1.767016 | 1.693636  | -5.081536 |
| H3  | -1.251961 | 2.895568  | -3.922730 |
| S4  | 0.178296  | 0.921438  | -3.923844 |
| O5  | 0.782219  | 1.309901  | 0.254400  |
| Fe6 | 0.366562  | 1.159237  | -1.460379 |
| N7  | -1.062839 | 2.542796  | -1.491427 |
| N8  | -1.037012 | -0.286447 | -1.140390 |
| N9  | 1.778365  | -0.307957 | -1.668076 |
| N10 | 1.726737  | 2.538048  | -1.932746 |
| C11 | -0.900015 | 3.894984  | -1.672939 |
| C12 | -2.161171 | 4.568132  | -1.561569 |
| C13 | -3.105679 | 3.608329  | -1.367989 |
| C14 | -2.409283 | 2.348024  | -1.317084 |
| C15 | -2.381725 | -0.102477 | -0.989222 |

|     |           |           |           |
|-----|-----------|-----------|-----------|
| C16 | -3.045238 | -1.362453 | -0.714824 |
| C17 | -2.073656 | -2.318343 | -0.696730 |
| C18 | -0.832252 | -1.624816 | -0.989234 |
| C19 | 1.580695  | -1.645233 | -1.493246 |
| C20 | 2.799445  | -2.371877 | -1.738292 |
| C21 | 3.751383  | -1.460093 | -2.076701 |
| C22 | 3.103543  | -0.155837 | -1.987028 |
| C23 | 3.073916  | 2.323657  | -2.055910 |
| C24 | 3.755290  | 3.581910  | -2.237108 |
| C25 | 2.802641  | 4.554336  | -2.248814 |
| C26 | 1.539526  | 3.890008  | -2.047220 |
| C27 | 0.311136  | 4.523598  | -1.932398 |
| H28 | 0.293995  | 5.600719  | -2.033195 |
| C29 | -3.024690 | 1.121622  | -1.094133 |
| H30 | -4.100938 | 1.132118  | -0.990907 |
| C31 | 0.388783  | -2.261490 | -1.150217 |
| H32 | 0.431543  | -3.329316 | -0.987404 |
| C33 | 3.711327  | 1.091065  | -2.087273 |
| H34 | 4.788450  | 1.132083  | -2.168279 |
| C35 | 0.540164  | 2.477496  | 3.481667  |
| H36 | 0.030250  | 2.089389  | 4.352901  |
| C37 | -0.053124 | 2.476314  | 2.256673  |
| H38 | -1.058949 | 2.103413  | 2.118835  |
| C39 | 0.665332  | 2.900694  | 1.077989  |
| H40 | 0.059096  | 3.340592  | 0.302496  |
| C41 | 1.954963  | 3.516598  | 1.267554  |
| H42 | 2.484482  | 3.950579  | 0.429875  |
| C43 | 2.487679  | 3.609985  | 2.536854  |
| O44 | 3.669911  | 4.287265  | 2.705656  |
| C45 | 4.200838  | 4.591205  | 3.959550  |
| O46 | 5.170809  | 5.306844  | 3.969510  |
| C47 | 3.544594  | 3.998594  | 5.122127  |
| C48 | 2.439445  | 3.192269  | 4.948845  |
| O49 | 1.783386  | 2.523797  | 5.908458  |
| H50 | 2.248231  | 2.470446  | 6.734765  |
| C51 | 1.827921  | 3.058952  | 3.655633  |
| H52 | -0.487309 | 2.825853  | -5.519294 |
| H53 | -2.281065 | 5.634534  | -1.595386 |
| H54 | -4.177558 | 3.738390  | -1.265099 |
| H55 | -4.117687 | -1.457275 | -0.571813 |
| H56 | -2.082812 | -3.397776 | -0.492394 |
| H57 | 2.860336  | -3.452968 | -1.732854 |
| H58 | 4.751336  | -1.758191 | -2.401952 |
| H59 | 4.831437  | 3.652461  | -2.337840 |
| H60 | 2.878273  | 5.615138  | -2.436700 |
| H61 | 3.921349  | 4.332058  | 6.130369  |

Warfarin 7-3 Transition State Quartet

|     |           |           |           |
|-----|-----------|-----------|-----------|
| C1  | -0.908590 | 2.203364  | -4.668063 |
| H2  | -1.773557 | 1.671941  | -5.071214 |
| H3  | -1.288350 | 2.891973  | -3.917623 |
| S4  | 0.194834  | 0.961586  | -3.890305 |
| O5  | 0.672620  | 1.386755  | 0.215850  |
| Fe6 | 0.383337  | 1.127372  | -1.489526 |
| N7  | -1.062681 | 2.527077  | -1.534625 |
| N8  | -1.027513 | -0.295482 | -1.161568 |
| N9  | 1.770520  | -0.301373 | -1.684455 |
| N10 | 1.758721  | 2.534283  | -1.895407 |
| C11 | -0.885623 | 3.882327  | -1.692524 |

|     |           |           |           |
|-----|-----------|-----------|-----------|
| C12 | -2.145551 | 4.556915  | -1.569186 |
| C13 | -3.093687 | 3.597823  | -1.379741 |
| C14 | -2.405234 | 2.334534  | -1.347867 |
| C15 | -2.377368 | -0.102930 | -1.008772 |
| C16 | -3.037245 | -1.361954 | -0.721689 |
| C17 | -2.068406 | -2.319584 | -0.701157 |
| C18 | -0.824386 | -1.634827 | -1.002099 |
| C19 | 1.570834  | -1.646627 | -1.507150 |
| C20 | 2.792048  | -2.362513 | -1.747717 |
| C21 | 3.744642  | -1.450157 | -2.085680 |
| C22 | 3.107389  | -0.145353 | -1.998640 |
| C23 | 3.096775  | 2.323374  | -2.030868 |
| C24 | 3.772760  | 3.584199  | -2.220018 |
| C25 | 2.814134  | 4.551274  | -2.233009 |
| C26 | 1.554388  | 3.879438  | -2.022848 |
| C27 | 0.325128  | 4.513858  | -1.930689 |
| H28 | 0.309294  | 5.590953  | -2.026749 |
| C29 | -3.024871 | 1.111732  | -1.118277 |
| H30 | -4.099201 | 1.123766  | -1.004522 |
| C31 | 0.391417  | -2.272550 | -1.162033 |
| H32 | 0.440969  | -3.337413 | -0.992090 |
| C33 | 3.730275  | 1.089317  | -2.086327 |
| H34 | 4.806262  | 1.121157  | -2.171478 |
| C35 | 0.532512  | 2.491451  | 3.475196  |
| H36 | 0.035349  | 2.082205  | 4.342632  |
| C37 | -0.072833 | 2.506073  | 2.258775  |
| H38 | -1.077662 | 2.132879  | 2.123951  |
| C39 | 0.635218  | 2.949239  | 1.071267  |
| H40 | 0.030872  | 3.413277  | 0.311722  |
| C41 | 1.947715  | 3.531959  | 1.262705  |
| H42 | 2.477551  | 3.962269  | 0.421989  |
| C43 | 2.484254  | 3.612372  | 2.525584  |
| O44 | 3.676655  | 4.269045  | 2.694271  |
| C45 | 4.202825  | 4.585994  | 3.950090  |
| O46 | 5.166319  | 5.305152  | 3.958858  |
| C47 | 3.545539  | 3.996982  | 5.113981  |
| C48 | 2.436006  | 3.192729  | 4.940486  |
| O49 | 1.780868  | 2.526267  | 5.900568  |
| H50 | 2.246708  | 2.470474  | 6.727523  |
| C51 | 1.823695  | 3.067806  | 3.649270  |
| H52 | -0.499710 | 2.822920  | -5.504472 |
| H53 | -2.269552 | 5.625585  | -1.597968 |
| H54 | -4.165233 | 3.732339  | -1.270029 |
| H55 | -4.109967 | -1.455380 | -0.574516 |
| H56 | -2.080519 | -3.397986 | -0.494183 |
| H57 | 2.855368  | -3.443622 | -1.734862 |
| H58 | 4.743861  | -1.753719 | -2.408055 |
| H59 | 4.847086  | 3.654499  | -2.333404 |
| H60 | 2.883120  | 5.613060  | -2.429258 |
| H61 | 3.920556  | 4.329126  | 6.123070  |

Warfarin 7-4 Reactant Complex Doublet

|     |           |          |           |
|-----|-----------|----------|-----------|
| C1  | -1.063421 | 2.105479 | -4.644150 |
| H2  | -1.930381 | 1.601342 | -5.081913 |
| H3  | -1.445843 | 2.754228 | -3.860231 |
| S4  | 0.031584  | 0.816298 | -3.950660 |
| O5  | 0.587888  | 1.019653 | 0.119754  |
| Fe6 | 0.306021  | 1.010697 | -1.496457 |
| N7  | -1.109480 | 2.430040 | -1.480957 |

|     |           |           |           |
|-----|-----------|-----------|-----------|
| N8  | -1.110857 | -0.404629 | -1.264070 |
| N9  | 1.718437  | -0.410214 | -1.792940 |
| N10 | 1.686066  | 2.429540  | -1.948302 |
| C11 | -0.932812 | 3.781405  | -1.601155 |
| C12 | -2.188339 | 4.470259  | -1.486436 |
| C13 | -3.143048 | 3.512485  | -1.337575 |
| C14 | -2.459851 | 2.243167  | -1.332407 |
| C15 | -2.448779 | -0.215216 | -1.095767 |
| C16 | -3.103419 | -1.470500 | -0.785438 |
| C17 | -2.126149 | -2.420548 | -0.749335 |
| C18 | -0.891586 | -1.732998 | -1.077768 |
| C19 | 1.536022  | -1.739374 | -1.570157 |
| C20 | 2.771911  | -2.451522 | -1.755525 |
| C21 | 3.718340  | -1.538472 | -2.115062 |
| C22 | 3.054140  | -0.243721 | -2.081987 |
| C23 | 3.026028  | 2.233696  | -2.110564 |
| C24 | 3.701608  | 3.497763  | -2.288693 |
| C25 | 2.746139  | 4.465004  | -2.279117 |
| C26 | 1.493761  | 3.788653  | -2.035699 |
| C27 | 0.276297  | 4.416447  | -1.861322 |
| H28 | 0.260365  | 5.497550  | -1.928602 |
| C29 | -3.090258 | 1.016562  | -1.174965 |
| H30 | -4.169386 | 1.036938  | -1.085398 |
| C31 | 0.340932  | -2.355960 | -1.218502 |
| H32 | 0.398650  | -3.414493 | -1.010536 |
| C33 | 3.662830  | 0.999779  | -2.173037 |
| H34 | 4.739697  | 1.043067  | -2.256733 |
| C35 | 0.931367  | 2.650085  | 3.795380  |
| H36 | 0.464634  | 2.087615  | 4.597014  |
| C37 | 0.284071  | 2.775875  | 2.582363  |
| H38 | -0.668914 | 2.292804  | 2.411927  |
| C39 | 0.876038  | 3.519206  | 1.549092  |
| H40 | 0.367888  | 3.594163  | 0.600080  |
| C41 | 2.109146  | 4.123735  | 1.721425  |
| H42 | 2.577127  | 4.691106  | 0.925107  |
| C43 | 2.741278  | 4.025245  | 2.959327  |
| O44 | 3.908314  | 4.714764  | 3.124150  |
| C45 | 4.504494  | 4.899658  | 4.366100  |
| O46 | 5.455324  | 5.637444  | 4.411209  |
| C47 | 3.916472  | 4.159669  | 5.473191  |
| C48 | 2.851754  | 3.324605  | 5.286364  |
| O49 | 2.363465  | 2.607043  | 6.323116  |
| H50 | 1.921188  | 1.818485  | 6.011070  |
| C51 | 2.176960  | 3.281937  | 4.007259  |
| H52 | -0.644911 | 2.753037  | -5.436734 |
| H53 | -2.288828 | 5.546405  | -1.515999 |
| H54 | -4.216431 | 3.619414  | -1.232550 |
| H55 | -4.171477 | -1.541461 | -0.603722 |
| H56 | -2.119098 | -3.488504 | -0.506589 |
| H57 | 2.864646  | -3.523920 | -1.676445 |
| H58 | 4.728969  | -1.826857 | -2.419409 |
| H59 | 4.778740  | 3.582071  | -2.373921 |
| H60 | 2.829443  | 5.533656  | -2.469561 |
| H61 | 4.317970  | 4.380666  | 6.478925  |

Warfarin 7-4 Reactant Complex Quartet

|    |           |          |           |
|----|-----------|----------|-----------|
| C1 | -1.050809 | 2.121428 | -4.635904 |
| H2 | -1.924110 | 1.612532 | -5.056363 |
| H3 | -1.422428 | 2.776606 | -3.852378 |

|     |           |           |           |
|-----|-----------|-----------|-----------|
| S4  | 0.050443  | 0.839710  | -3.944254 |
| O5  | 0.563939  | 1.031161  | 0.126699  |
| Fe6 | 0.309983  | 1.012972  | -1.487708 |
| N7  | -1.108804 | 2.431798  | -1.478356 |
| N8  | -1.108899 | -0.404026 | -1.261544 |
| N9  | 1.721521  | -0.407165 | -1.781835 |
| N10 | 1.688886  | 2.428232  | -1.942495 |
| C11 | -0.933262 | 3.780910  | -1.596941 |
| C12 | -2.188589 | 4.470156  | -1.484943 |
| C13 | -3.144513 | 3.511266  | -1.337741 |
| C14 | -2.460331 | 2.241558  | -1.332223 |
| C15 | -2.444502 | -0.216156 | -1.095502 |
| C16 | -3.099958 | -1.471259 | -0.784301 |
| C17 | -2.121171 | -2.422117 | -0.745310 |
| C18 | -0.886300 | -1.734423 | -1.072838 |
| C19 | 1.537758  | -1.736119 | -1.563788 |
| C20 | 2.772929  | -2.448798 | -1.751759 |
| C21 | 3.719544  | -1.537477 | -2.108736 |
| C22 | 3.059274  | -0.241391 | -2.072710 |
| C23 | 3.027565  | 2.233521  | -2.105823 |
| C24 | 3.701939  | 3.498050  | -2.287627 |
| C25 | 2.744671  | 4.465763  | -2.277880 |
| C26 | 1.493670  | 3.789373  | -2.032246 |
| C27 | 0.278165  | 4.417464  | -1.856942 |
| H28 | 0.262797  | 5.498107  | -1.922930 |
| C29 | -3.089000 | 1.016016  | -1.179297 |
| H30 | -4.169004 | 1.033863  | -1.094953 |
| C31 | 0.341752  | -2.355701 | -1.215866 |
| H32 | 0.401233  | -3.415125 | -1.015477 |
| C33 | 3.667889  | 1.000192  | -2.165586 |
| H34 | 4.744537  | 1.043383  | -2.251771 |
| C35 | 0.949371  | 2.654933  | 3.796018  |
| H36 | 0.481377  | 2.093119  | 4.598731  |
| C37 | 0.301811  | 2.783692  | 2.583546  |
| H38 | -0.652419 | 2.303939  | 2.414106  |
| C39 | 0.894545  | 3.527928  | 1.552777  |
| H40 | 0.385659  | 3.606814  | 0.603210  |
| C41 | 2.127926  | 4.134076  | 1.725643  |
| H42 | 2.594482  | 4.705847  | 0.934105  |
| C43 | 2.760475  | 4.029444  | 2.964046  |
| O44 | 3.928403  | 4.717200  | 3.131507  |
| C45 | 4.519457  | 4.902771  | 4.375268  |
| O46 | 5.473574  | 5.636608  | 4.422941  |
| C47 | 3.924838  | 4.166954  | 5.482174  |
| C48 | 2.864463  | 3.327928  | 5.290024  |
| O49 | 2.375135  | 2.607033  | 6.325752  |
| H50 | 1.930580  | 1.822540  | 6.012618  |
| C51 | 2.195003  | 3.283773  | 4.010356  |
| H52 | -0.640512 | 2.761717  | -5.438978 |
| H53 | -2.290175 | 5.546515  | -1.514764 |
| H54 | -4.217264 | 3.618632  | -1.233233 |
| H55 | -4.167731 | -1.540432 | -0.603323 |
| H56 | -2.111458 | -3.490041 | -0.503566 |
| H57 | 2.864491  | -3.521798 | -1.675834 |
| H58 | 4.728656  | -1.829123 | -2.416320 |
| H59 | 4.778052  | 3.582728  | -2.376049 |
| H60 | 2.828013  | 5.534060  | -2.469782 |
| H61 | 4.324752  | 4.384846  | 6.489658  |

Warfarin 7-4 Transition State Doublet



|     |           |           |           |
|-----|-----------|-----------|-----------|
| C1  | -1.065901 | 2.059583  | -4.555869 |
| H2  | -1.905417 | 1.507324  | -4.989756 |
| H3  | -1.484401 | 2.718640  | -3.798544 |
| S4  | 0.061447  | 0.824186  | -3.792227 |
| O5  | 0.848132  | 1.290922  | 0.346380  |
| Fe6 | 0.383723  | 1.147612  | -1.356242 |
| N7  | -1.044683 | 2.528046  | -1.365704 |
| N8  | -1.022373 | -0.300905 | -1.036677 |
| N9  | 1.790102  | -0.317348 | -1.620464 |
| N10 | 1.725448  | 2.529779  | -1.873701 |
| C11 | -0.892396 | 3.881271  | -1.558798 |
| C12 | -2.161036 | 4.545908  | -1.478215 |
| C13 | -3.099367 | 3.575808  | -1.294222 |
| C14 | -2.392100 | 2.324963  | -1.219916 |
| C15 | -2.372881 | -0.127590 | -0.919031 |
| C16 | -3.037797 | -1.396419 | -0.694190 |
| C17 | -2.060703 | -2.347722 | -0.673746 |
| C18 | -0.817744 | -1.640903 | -0.925676 |
| C19 | 1.599348  | -1.653945 | -1.438951 |
| C20 | 2.819898  | -2.376242 | -1.685804 |
| C21 | 3.763498  | -1.464929 | -2.044368 |
| C22 | 3.110354  | -0.163222 | -1.961951 |
| C23 | 3.067657  | 2.317325  | -2.032552 |
| C24 | 3.744415  | 3.572939  | -2.237582 |
| C25 | 2.791431  | 4.545750  | -2.243179 |
| C26 | 1.537082  | 3.881732  | -1.990558 |
| C27 | 0.311104  | 4.514371  | -1.838135 |
| H28 | 0.287578  | 5.590490  | -1.948783 |
| C29 | -3.015933 | 1.096355  | -1.025803 |
| H30 | -4.097120 | 1.111603  | -0.966868 |
| C31 | 0.406311  | -2.272059 | -1.102535 |
| H32 | 0.448463  | -3.341498 | -0.955144 |
| C33 | 3.708716  | 1.086135  | -2.081498 |
| H34 | 4.782365  | 1.133052  | -2.193067 |
| C35 | 0.722971  | 2.412906  | 3.668802  |
| H36 | 0.213206  | 2.022031  | 4.544786  |
| C37 | 0.095713  | 2.392767  | 2.454884  |
| H38 | -0.907609 | 2.000770  | 2.355106  |
| C39 | 0.760497  | 2.842621  | 1.252689  |
| H40 | 0.120073  | 3.273892  | 0.495714  |
| C41 | 2.036524  | 3.493104  | 1.424767  |
| H42 | 2.531611  | 3.953974  | 0.576033  |
| C43 | 2.601131  | 3.603544  | 2.683268  |
| O44 | 3.746599  | 4.348530  | 2.826866  |
| C45 | 4.289996  | 4.697990  | 4.070076  |
| O46 | 5.213154  | 5.468768  | 4.062537  |
| C47 | 3.705583  | 4.060011  | 5.242842  |
| C48 | 2.651742  | 3.195449  | 5.097661  |
| O49 | 2.162286  | 2.541377  | 6.184302  |
| H50 | 1.777491  | 1.710216  | 5.918754  |
| C51 | 1.998527  | 3.023568  | 3.825490  |
| H52 | -0.659258 | 2.699726  | -5.371877 |
| H53 | -2.281877 | 5.612417  | -1.531038 |
| H54 | -4.177464 | 3.655719  | -1.217517 |
| H55 | -4.112490 | -1.492368 | -0.570976 |
| H56 | -2.065263 | -3.429211 | -0.481073 |
| H57 | 2.895956  | -3.456143 | -1.659791 |
| H58 | 4.762007  | -1.765749 | -2.378380 |
| H59 | 4.819485  | 3.637659  | -2.336963 |

|     |          |          |           |
|-----|----------|----------|-----------|
| H60 | 2.870483 | 5.604461 | -2.453386 |
| H61 | 4.136046 | 4.320349 | 6.251062  |

Warfarin 7-4 Transition State Quartet

|     |           |           |           |
|-----|-----------|-----------|-----------|
| C1  | -1.073205 | 2.064792  | -4.549672 |
| H2  | -1.905644 | 1.496901  | -4.973575 |
| H3  | -1.495300 | 2.726887  | -3.796927 |
| S4  | 0.084446  | 0.865922  | -3.778685 |
| O5  | 0.756031  | 1.350461  | 0.312796  |
| Fe6 | 0.399717  | 1.113208  | -1.371025 |
| N7  | -1.044779 | 2.510116  | -1.395847 |
| N8  | -1.012456 | -0.313520 | -1.055684 |
| N9  | 1.784385  | -0.316510 | -1.631691 |
| N10 | 1.748814  | 2.517748  | -1.856401 |
| C11 | -0.881718 | 3.865207  | -1.573483 |
| C12 | -2.149371 | 4.531200  | -1.485127 |
| C13 | -3.090673 | 3.561979  | -1.303319 |
| C14 | -2.389147 | 2.309153  | -1.241169 |
| C15 | -2.370248 | -0.132178 | -0.934856 |
| C16 | -3.030737 | -1.401766 | -0.700562 |
| C17 | -2.055872 | -2.353869 | -0.679093 |
| C18 | -0.810170 | -1.654741 | -0.938526 |
| C19 | 1.591706  | -1.663522 | -1.450167 |
| C20 | 2.815416  | -2.375399 | -1.695494 |
| C21 | 3.759750  | -1.462240 | -2.052275 |
| C22 | 3.114655  | -0.159876 | -1.971290 |
| C23 | 3.085262  | 2.309919  | -2.021725 |
| C24 | 3.756336  | 3.568274  | -2.229006 |
| C25 | 2.798495  | 4.536264  | -2.234747 |
| C26 | 1.546541  | 3.866023  | -1.978187 |
| C27 | 0.321207  | 4.499606  | -1.838350 |
| H28 | 0.299653  | 5.575448  | -1.943588 |
| C29 | -3.014758 | 1.082083  | -1.041452 |
| H30 | -4.095117 | 1.099006  | -0.970704 |
| C31 | 0.410844  | -2.286099 | -1.112936 |
| H32 | 0.457870  | -3.353810 | -0.957206 |
| C33 | 3.724268  | 1.078073  | -2.082301 |
| H34 | 4.797750  | 1.118811  | -2.190606 |
| C35 | 0.719758  | 2.417056  | 3.668049  |
| H36 | 0.212576  | 2.018478  | 4.540662  |
| C37 | 0.082669  | 2.411814  | 2.460990  |
| H38 | -0.922328 | 2.027993  | 2.364499  |
| C39 | 0.737129  | 2.875495  | 1.253760  |
| H40 | 0.098669  | 3.316427  | 0.506072  |
| C41 | 2.024446  | 3.508189  | 1.426375  |
| H42 | 2.509698  | 3.981324  | 0.581169  |
| C43 | 2.597581  | 3.601398  | 2.681417  |
| O44 | 3.746676  | 4.338725  | 2.824663  |
| C45 | 4.291605  | 4.693409  | 4.069171  |
| O46 | 5.212606  | 5.464522  | 4.056609  |
| C47 | 3.708142  | 4.057478  | 5.242564  |
| C48 | 2.652903  | 3.190683  | 5.096036  |
| O49 | 2.167464  | 2.538569  | 6.182713  |
| H50 | 1.776337  | 1.708583  | 5.915332  |
| C51 | 1.999719  | 3.020170  | 3.826103  |
| H52 | -0.667102 | 2.700500  | -5.369970 |
| H53 | -2.272825 | 5.599865  | -1.532760 |
| H54 | -4.169087 | 3.646339  | -1.221824 |
| H55 | -4.105860 | -1.495494 | -0.574137 |

|     |           |           |           |
|-----|-----------|-----------|-----------|
| H56 | -2.060924 | -3.434412 | -0.482530 |
| H57 | 2.895190  | -3.454923 | -1.665526 |
| H58 | 4.759092  | -1.766061 | -2.379676 |
| H59 | 4.830263  | 3.635873  | -2.332457 |
| H60 | 2.873320  | 5.596675  | -2.446929 |
| H61 | 4.135642  | 4.318221  | 6.253169  |

Warfarin 7-5 Reactant Complex Doublet

|     |           |           |           |
|-----|-----------|-----------|-----------|
| C1  | -1.039507 | 1.882525  | -4.774365 |
| H2  | -1.700496 | 1.312570  | -5.438242 |
| H3  | -1.670516 | 2.358941  | -4.026396 |
| S4  | 0.071628  | 0.654401  | -4.001486 |
| O5  | 0.547189  | 1.048709  | 0.055744  |
| Fe6 | 0.283956  | 0.981601  | -1.563368 |
| N7  | -1.140661 | 2.400227  | -1.604353 |
| N8  | -1.134560 | -0.421175 | -1.298426 |
| N9  | 1.700928  | -0.443033 | -1.824684 |
| N10 | 1.675998  | 2.394398  | -2.027975 |
| C11 | -0.951502 | 3.751175  | -1.721538 |
| C12 | -2.193273 | 4.456364  | -1.563333 |
| C13 | -3.153914 | 3.508783  | -1.384208 |
| C14 | -2.484188 | 2.228991  | -1.398564 |
| C15 | -2.468059 | -0.224617 | -1.090051 |
| C16 | -3.117639 | -1.479657 | -0.760616 |
| C17 | -2.146667 | -2.434207 | -0.770417 |
| C18 | -0.919191 | -1.750850 | -1.126733 |
| C19 | 1.504526  | -1.775448 | -1.630648 |
| C20 | 2.737379  | -2.494533 | -1.809841 |
| C21 | 3.696020  | -1.580688 | -2.120936 |
| C22 | 3.039788  | -0.281819 | -2.093046 |
| C23 | 3.022618  | 2.196775  | -2.150509 |
| C24 | 3.703793  | 3.463484  | -2.293182 |
| C25 | 2.747650  | 4.432266  | -2.280251 |
| C26 | 1.488086  | 3.752511  | -2.096559 |
| C27 | 0.263274  | 4.377858  | -1.947093 |
| H28 | 0.249221  | 5.460222  | -1.948443 |
| C29 | -3.108775 | 1.006445  | -1.174091 |
| H30 | -4.182040 | 1.030735  | -1.032621 |
| C31 | 0.306307  | -2.384214 | -1.289466 |
| H32 | 0.355873  | -3.446032 | -1.099284 |
| C33 | 3.655758  | 0.959001  | -2.183381 |
| H34 | 4.734607  | 0.992682  | -2.240144 |
| C35 | 0.865359  | 2.574215  | 3.492896  |
| H36 | 0.408573  | 1.939026  | 4.239150  |
| C37 | 0.254167  | 2.815913  | 2.282082  |
| H38 | -0.693244 | 2.354278  | 2.037715  |
| C39 | 0.889641  | 3.624901  | 1.329867  |
| H40 | 0.404277  | 3.791701  | 0.383757  |
| C41 | 2.127246  | 4.196953  | 1.578565  |
| H42 | 2.622478  | 4.816506  | 0.841163  |
| C43 | 2.730389  | 3.972286  | 2.813121  |
| O44 | 3.934337  | 4.579592  | 3.059854  |
| C45 | 4.554519  | 4.540075  | 4.299059  |
| O46 | 5.555348  | 5.209185  | 4.423789  |
| C47 | 3.928160  | 3.710901  | 5.321629  |
| C48 | 2.777346  | 3.008368  | 5.047279  |
| O49 | 2.120520  | 2.191791  | 5.882064  |
| H50 | 2.602995  | 1.956043  | 6.667827  |
| C51 | 2.118204  | 3.163675  | 3.775364  |

|     |           |           |           |
|-----|-----------|-----------|-----------|
| H52 | -0.594246 | 2.678081  | -5.402954 |
| H53 | -2.282859 | 5.538507  | -1.555559 |
| H54 | -4.218309 | 3.655190  | -1.247719 |
| H55 | -4.177336 | -1.557878 | -0.534441 |
| H56 | -2.137992 | -3.507491 | -0.550213 |
| H57 | 2.819014  | -3.572986 | -1.785840 |
| H58 | 4.713037  | -1.874107 | -2.386999 |
| H59 | 4.783615  | 3.556586  | -2.367102 |
| H60 | 2.838206  | 5.510013  | -2.418392 |
| H61 | 4.363266  | 3.807976  | 6.339324  |

Warfarin 7-5 Reactant Complex Quartet

|     |           |           |           |
|-----|-----------|-----------|-----------|
| C1  | -1.032812 | 1.883624  | -4.765447 |
| H2  | -1.691867 | 1.304828  | -5.424127 |
| H3  | -1.663359 | 2.357824  | -4.015900 |
| S4  | 0.090909  | 0.668731  | -3.996007 |
| O5  | 0.536765  | 0.965058  | 0.052359  |
| Fe6 | 0.297991  | 0.970126  | -1.565465 |
| N7  | -1.126531 | 2.399455  | -1.584814 |
| N8  | -1.126964 | -0.427677 | -1.321747 |
| N9  | 1.712585  | -0.441776 | -1.846183 |
| N10 | 1.690348  | 2.394442  | -2.002629 |
| C11 | -0.940759 | 3.749353  | -1.707351 |
| C12 | -2.184262 | 4.454122  | -1.560682 |
| C13 | -3.143766 | 3.505019  | -1.380656 |
| C14 | -2.471798 | 2.226675  | -1.385966 |
| C15 | -2.456580 | -0.228816 | -1.101644 |
| C16 | -3.104756 | -1.482493 | -0.766365 |
| C17 | -2.132224 | -2.437153 | -0.775371 |
| C18 | -0.906036 | -1.755671 | -1.139783 |
| C19 | 1.516874  | -1.773130 | -1.648469 |
| C20 | 2.751016  | -2.489458 | -1.822487 |
| C21 | 3.709878  | -1.575015 | -2.130315 |
| C22 | 3.053982  | -0.277154 | -2.103559 |
| C23 | 3.036013  | 2.199876  | -2.134852 |
| C24 | 3.713884  | 3.467475  | -2.285889 |
| C25 | 2.754727  | 4.435812  | -2.272112 |
| C26 | 1.498592  | 3.752985  | -2.077310 |
| C27 | 0.274161  | 4.379163  | -1.934151 |
| H28 | 0.256937  | 5.459779  | -1.952271 |
| C29 | -3.096983 | 1.003785  | -1.171519 |
| H30 | -4.168920 | 1.027821  | -1.024838 |
| C31 | 0.321001  | -2.382542 | -1.296096 |
| H32 | 0.379609  | -3.439904 | -1.082578 |
| C33 | 3.671460  | 0.964043  | -2.177323 |
| H34 | 4.750545  | 0.998352  | -2.228902 |
| C35 | 0.829996  | 2.531879  | 3.510119  |
| H36 | 0.369802  | 1.913654  | 4.268522  |
| C37 | 0.220573  | 2.753764  | 2.294756  |
| H38 | -0.727267 | 2.289972  | 2.057189  |
| C39 | 0.861828  | 3.542424  | 1.328415  |
| H40 | 0.380056  | 3.681690  | 0.375960  |
| C41 | 2.105424  | 4.104196  | 1.558080  |
| H42 | 2.612241  | 4.686636  | 0.799603  |
| C43 | 2.701411  | 3.907875  | 2.801271  |
| O44 | 3.904066  | 4.522507  | 3.036036  |
| C45 | 4.519091  | 4.511253  | 4.277442  |
| O46 | 5.518995  | 5.185874  | 4.390799  |
| C47 | 3.893246  | 3.702306  | 5.315310  |

|     |           |           |           |
|-----|-----------|-----------|-----------|
| C48 | 2.741063  | 2.996837  | 5.054801  |
| O49 | 2.083795  | 2.197135  | 5.908236  |
| H50 | 2.562240  | 1.986792  | 6.702323  |
| C51 | 2.084267  | 3.124468  | 3.780925  |
| H52 | -0.592415 | 2.675414  | -5.400690 |
| H53 | -2.278207 | 5.536318  | -1.557414 |
| H54 | -4.208900 | 3.651085  | -1.247961 |
| H55 | -4.163570 | -1.559995 | -0.539515 |
| H56 | -2.122603 | -3.507577 | -0.551509 |
| H57 | 2.832502  | -3.566598 | -1.795982 |
| H58 | 4.726360  | -1.866101 | -2.393919 |
| H59 | 4.792104  | 3.561995  | -2.360483 |
| H60 | 2.843395  | 5.513494  | -2.413614 |
| H61 | 4.339103  | 3.807694  | 6.326444  |

Warfarin 7-5 Transition State Doublet

|     |           |           |           |
|-----|-----------|-----------|-----------|
| C1  | -1.018185 | 1.861675  | -4.663666 |
| H2  | -1.669993 | 1.246987  | -5.294750 |
| H3  | -1.654266 | 2.357537  | -3.932161 |
| S4  | 0.119785  | 0.679717  | -3.836360 |
| O5  | 0.850938  | 1.263774  | 0.247345  |
| Fe6 | 0.365153  | 1.112195  | -1.452177 |
| N7  | -1.067403 | 2.499359  | -1.472295 |
| N8  | -1.042357 | -0.317177 | -1.091790 |
| N9  | 1.776647  | -0.349581 | -1.674688 |
| N10 | 1.718126  | 2.499720  | -1.956797 |
| C11 | -0.903281 | 3.855570  | -1.644766 |
| C12 | -2.161550 | 4.536375  | -1.529758 |
| C13 | -3.106240 | 3.574397  | -1.338173 |
| C14 | -2.411362 | 2.312304  | -1.288173 |
| C15 | -2.390182 | -0.135030 | -0.933204 |
| C16 | -3.051000 | -1.403706 | -0.679519 |
| C17 | -2.079773 | -2.357842 | -0.700372 |
| C18 | -0.841370 | -1.657173 | -0.986280 |
| C19 | 1.573807  | -1.685706 | -1.509159 |
| C20 | 2.793457  | -2.413869 | -1.745041 |
| C21 | 3.748113  | -1.503129 | -2.067119 |
| C22 | 3.100039  | -0.197346 | -1.998096 |
| C23 | 3.064237  | 2.285405  | -2.094484 |
| C24 | 3.746338  | 3.545907  | -2.259209 |
| C25 | 2.793964  | 4.522019  | -2.241971 |
| C26 | 1.534510  | 3.853191  | -2.035607 |
| C27 | 0.306637  | 4.485612  | -1.881828 |
| H28 | 0.287749  | 5.565993  | -1.915196 |
| C29 | -3.032511 | 1.087742  | -1.043830 |
| H30 | -4.109861 | 1.106982  | -0.939051 |
| C31 | 0.375912  | -2.295626 | -1.179634 |
| H32 | 0.410393  | -3.367017 | -1.044449 |
| C33 | 3.701945  | 1.050651  | -2.126045 |
| H34 | 4.778304  | 1.092010  | -2.220519 |
| C35 | 0.645751  | 2.308552  | 3.502468  |
| H36 | 0.149920  | 1.860956  | 4.353630  |
| C37 | 0.046119  | 2.351736  | 2.278254  |
| H38 | -0.947309 | 1.953031  | 2.125832  |
| C39 | 0.752832  | 2.833786  | 1.116189  |
| H40 | 0.144797  | 3.284551  | 0.347145  |
| C41 | 2.042148  | 3.448516  | 1.327080  |
| H42 | 2.571850  | 3.905626  | 0.500076  |
| C43 | 2.583891  | 3.487553  | 2.598081  |

|     |           |           |           |
|-----|-----------|-----------|-----------|
| O44 | 3.771790  | 4.155569  | 2.795620  |
| C45 | 4.343904  | 4.341494  | 4.055166  |
| O46 | 5.302457  | 5.072494  | 4.110974  |
| C47 | 3.735741  | 3.631985  | 5.177168  |
| C48 | 2.584151  | 2.896673  | 4.975525  |
| O49 | 1.935007  | 2.168938  | 5.898015  |
| H50 | 2.400559  | 2.058051  | 6.718271  |
| C51 | 1.931847  | 2.885592  | 3.695483  |
| H52 | -0.595388 | 2.642116  | -5.335795 |
| H53 | -2.272347 | 5.610717  | -1.548660 |
| H54 | -4.179004 | 3.689305  | -1.232755 |
| H55 | -4.119676 | -1.505972 | -0.512255 |
| H56 | -2.086411 | -3.441997 | -0.524721 |
| H57 | 2.859225  | -3.496045 | -1.762715 |
| H58 | 4.747992  | -1.812484 | -2.370004 |
| H59 | 4.823928  | 3.619167  | -2.344257 |
| H60 | 2.878449  | 5.590493  | -2.401615 |
| H61 | 4.224379  | 3.778485  | 6.182902  |

Warfarin 7-5 Transition State Quartet

|     |           |           |           |
|-----|-----------|-----------|-----------|
| C1  | -1.030214 | 1.862554  | -4.657132 |
| H2  | -1.674094 | 1.233788  | -5.281307 |
| H3  | -1.669369 | 2.358501  | -3.929105 |
| S4  | 0.130330  | 0.713244  | -3.820134 |
| O5  | 0.734816  | 1.352321  | 0.219846  |
| Fe6 | 0.391686  | 1.072503  | -1.468395 |
| N7  | -1.062491 | 2.474264  | -1.520026 |
| N8  | -1.020802 | -0.336553 | -1.108542 |
| N9  | 1.778308  | -0.349710 | -1.687558 |
| N10 | 1.752964  | 2.483374  | -1.936512 |
| C11 | -0.888063 | 3.829842  | -1.669219 |
| C12 | -2.144843 | 4.511417  | -1.543536 |
| C13 | -3.092350 | 3.550550  | -1.356496 |
| C14 | -2.403469 | 2.286091  | -1.324079 |
| C15 | -2.374475 | -0.147201 | -0.954065 |
| C16 | -3.031811 | -1.414491 | -0.688965 |
| C17 | -2.062394 | -2.370855 | -0.704882 |
| C18 | -0.820626 | -1.678500 | -0.996852 |
| C19 | 1.574945  | -1.695891 | -1.523256 |
| C20 | 2.796274  | -2.411192 | -1.758460 |
| C21 | 3.750338  | -1.498888 | -2.079754 |
| C22 | 3.111911  | -0.194043 | -2.011769 |
| C23 | 3.092762  | 2.277066  | -2.080709 |
| C24 | 3.766419  | 3.542034  | -2.247059 |
| C25 | 2.806557  | 4.511250  | -2.229596 |
| C26 | 1.550739  | 3.833817  | -2.020416 |
| C27 | 0.323089  | 4.464187  | -1.885916 |
| H28 | 0.302590  | 5.544017  | -1.914173 |
| C29 | -3.023917 | 1.064159  | -1.074260 |
| H30 | -4.100463 | 1.080541  | -0.965189 |
| C31 | 0.390377  | -2.316505 | -1.190171 |
| H32 | 0.433670  | -3.386038 | -1.050830 |
| C33 | 3.728506  | 1.042919  | -2.130266 |
| H34 | 4.803917  | 1.074494  | -2.225614 |
| C35 | 0.649792  | 2.310637  | 3.509214  |
| H36 | 0.163992  | 1.844672  | 4.355779  |
| C37 | 0.034340  | 2.378342  | 2.299548  |
| H38 | -0.958117 | 1.979909  | 2.150789  |
| C39 | 0.722715  | 2.888175  | 1.128832  |

|     |           |           |           |
|-----|-----------|-----------|-----------|
| H40 | 0.111989  | 3.365529  | 0.381096  |
| C41 | 2.027101  | 3.481072  | 1.340848  |
| H42 | 2.542449  | 3.959024  | 0.516800  |
| C43 | 2.581161  | 3.496687  | 2.603953  |
| O44 | 3.770261  | 4.160120  | 2.801643  |
| C45 | 4.342583  | 4.348599  | 4.064435  |
| O46 | 5.294976  | 5.085464  | 4.119776  |
| C47 | 3.739435  | 3.633954  | 5.184651  |
| C48 | 2.591340  | 2.892464  | 4.980430  |
| O49 | 1.944909  | 2.161246  | 5.902657  |
| H50 | 2.405218  | 2.064132  | 6.726608  |
| C51 | 1.938719  | 2.884373  | 3.702844  |
| H52 | -0.605918 | 2.638802  | -5.333743 |
| H53 | -2.260088 | 5.587399  | -1.552670 |
| H54 | -4.164297 | 3.670954  | -1.241520 |
| H55 | -4.100685 | -1.515128 | -0.520324 |
| H56 | -2.068570 | -3.453840 | -0.525552 |
| H57 | 2.867294  | -3.493761 | -1.772677 |
| H58 | 4.751881  | -1.809602 | -2.377062 |
| H59 | 4.842882  | 3.619872  | -2.333884 |
| H60 | 2.883914  | 5.581699  | -2.391284 |
| H61 | 4.227292  | 3.780518  | 6.192199  |

Warfarin 7-6 Reactant Complex Doublet

|     |           |           |           |
|-----|-----------|-----------|-----------|
| C1  | -0.946032 | 1.780434  | -4.699483 |
| H2  | -1.634834 | 1.248733  | -5.369762 |
| H3  | -1.554336 | 2.271255  | -3.943150 |
| S4  | 0.123825  | 0.519775  | -3.942522 |
| O5  | 0.598435  | 0.974560  | 0.084407  |
| Fe6 | 0.321824  | 0.940421  | -1.534044 |
| N7  | -1.109147 | 2.374565  | -1.568592 |
| N8  | -1.100057 | -0.451022 | -1.264461 |
| N9  | 1.729611  | -0.478614 | -1.806661 |
| N10 | 1.706348  | 2.356229  | -2.010758 |
| C11 | -0.930097 | 3.717546  | -1.764926 |
| C12 | -2.161000 | 4.430871  | -1.565640 |
| C13 | -3.107153 | 3.497263  | -1.271421 |
| C14 | -2.440052 | 2.217511  | -1.279308 |
| C15 | -2.421316 | -0.238978 | -1.013318 |
| C16 | -3.086640 | -1.491147 | -0.721013 |
| C17 | -2.132953 | -2.462756 | -0.780707 |
| C18 | -0.902860 | -1.788418 | -1.146250 |
| C19 | 1.517916  | -1.814145 | -1.665893 |
| C20 | 2.744042  | -2.537407 | -1.867648 |
| C21 | 3.715818  | -1.623790 | -2.134597 |
| C22 | 3.072193  | -0.318489 | -2.062956 |
| C23 | 3.055947  | 2.165766  | -2.093078 |
| C24 | 3.733164  | 3.437081  | -2.245949 |
| C25 | 2.766726  | 4.395278  | -2.307184 |
| C26 | 1.507696  | 3.709703  | -2.139722 |
| C27 | 0.279535  | 4.336215  | -2.049668 |
| H28 | 0.261389  | 5.414965  | -2.136571 |
| C29 | -3.054081 | 0.996315  | -1.026191 |
| H30 | -4.116553 | 1.015947  | -0.819551 |
| C31 | 0.314086  | -2.428954 | -1.347652 |
| H32 | 0.356634  | -3.501409 | -1.214251 |
| C33 | 3.689281  | 0.925317  | -2.117671 |
| H34 | 4.768428  | 0.960258  | -2.153852 |
| C35 | 0.658632  | 2.707282  | 3.506227  |

|     |           |           |           |
|-----|-----------|-----------|-----------|
| H36 | 0.218211  | 2.149505  | 4.322464  |
| C37 | -0.007685 | 2.888411  | 2.312852  |
| H38 | -0.990273 | 2.460880  | 2.157226  |
| C39 | 0.604054  | 3.609968  | 1.278389  |
| H40 | 0.073518  | 3.734868  | 0.351361  |
| C41 | 1.885194  | 4.119565  | 1.410255  |
| H42 | 2.375035  | 4.646053  | 0.600453  |
| C43 | 2.530175  | 3.980503  | 2.637971  |
| O44 | 3.750749  | 4.573148  | 2.787399  |
| C45 | 4.354665  | 4.743339  | 4.027544  |
| O46 | 5.365023  | 5.400963  | 4.040144  |
| C47 | 3.698463  | 4.115098  | 5.168655  |
| C48 | 2.571616  | 3.344171  | 4.986158  |
| O49 | 1.899133  | 2.680695  | 5.932073  |
| H50 | 2.325263  | 2.662044  | 6.782370  |
| C51 | 1.929078  | 3.292172  | 3.695225  |
| H52 | -0.465702 | 2.563100  | -5.310354 |
| H53 | -2.260404 | 5.509424  | -1.606451 |
| H54 | -4.158835 | 3.674191  | -1.069637 |
| H55 | -4.153345 | -1.536121 | -0.531498 |
| H56 | -2.134106 | -3.534106 | -0.571230 |
| H57 | 2.794471  | -3.617207 | -1.849749 |
| H58 | 4.736481  | -1.921846 | -2.381863 |
| H59 | 4.813222  | 3.560520  | -2.269402 |
| H60 | 2.850397  | 5.471012  | -2.467763 |
| H61 | 4.062679  | 4.448564  | 6.167347  |

Warfarin 7-6 Reactant Complex Quartet

|     |           |           |           |
|-----|-----------|-----------|-----------|
| C1  | -0.934771 | 1.788903  | -4.693198 |
| H2  | -1.623869 | 1.249332  | -5.357600 |
| H3  | -1.541163 | 2.280655  | -3.936710 |
| S4  | 0.142418  | 0.536720  | -3.936331 |
| O5  | 0.572106  | 0.974702  | 0.092026  |
| Fe6 | 0.326914  | 0.934180  | -1.525925 |
| N7  | -1.107928 | 2.370681  | -1.566504 |
| N8  | -1.098312 | -0.456733 | -1.264585 |
| N9  | 1.732410  | -0.481511 | -1.800607 |
| N10 | 1.711542  | 2.350535  | -2.002701 |
| C11 | -0.928983 | 3.712094  | -1.761613 |
| C12 | -2.158841 | 4.426577  | -1.561793 |
| C13 | -3.105641 | 3.493702  | -1.265998 |
| C14 | -2.439901 | 2.212439  | -1.274905 |
| C15 | -2.417646 | -0.244056 | -1.014041 |
| C16 | -3.083729 | -1.494600 | -0.719050 |
| C17 | -2.130414 | -2.468374 | -0.775658 |
| C18 | -0.899256 | -1.795286 | -1.142213 |
| C19 | 1.519409  | -1.816979 | -1.662847 |
| C20 | 2.746134  | -2.539371 | -1.868968 |
| C21 | 3.718760  | -1.625038 | -2.136667 |
| C22 | 3.075650  | -0.319701 | -2.060760 |
| C23 | 3.060676  | 2.162012  | -2.086152 |
| C24 | 3.735509  | 3.435190  | -2.241529 |
| C25 | 2.767321  | 4.391215  | -2.304914 |
| C26 | 1.509629  | 3.704675  | -2.135748 |
| C27 | 0.282299  | 4.330603  | -2.047934 |
| H28 | 0.264994  | 5.409492  | -2.134979 |
| C29 | -3.052785 | 0.992632  | -1.025926 |
| H30 | -4.114747 | 1.009303  | -0.816259 |
| C31 | 0.317076  | -2.433684 | -1.342911 |



|     |           |           |           |
|-----|-----------|-----------|-----------|
| H32 | 0.360243  | -3.506190 | -1.207242 |
| C33 | 3.694832  | 0.921315  | -2.112642 |
| H34 | 4.774015  | 0.953934  | -2.148372 |
| C35 | 0.660088  | 2.709899  | 3.512750  |
| H36 | 0.220377  | 2.150651  | 4.328285  |
| C37 | -0.007419 | 2.891225  | 2.319539  |
| H38 | -0.990496 | 2.464928  | 2.163329  |
| C39 | 0.605639  | 3.610907  | 1.284125  |
| H40 | 0.074711  | 3.734013  | 0.357645  |
| C41 | 1.888181  | 4.117973  | 1.416051  |
| H42 | 2.379096  | 4.640134  | 0.602526  |
| C43 | 2.532553  | 3.980418  | 2.643222  |
| O44 | 3.755548  | 4.569999  | 2.792256  |
| C45 | 4.359664  | 4.740839  | 4.032979  |
| O46 | 5.369939  | 5.398455  | 4.044960  |
| C47 | 3.702959  | 4.113841  | 5.173967  |
| C48 | 2.572982  | 3.345793  | 4.992616  |
| O49 | 1.899148  | 2.685238  | 5.938735  |
| H50 | 2.325329  | 2.663879  | 6.786747  |
| C51 | 1.930062  | 3.295040  | 3.700045  |
| H52 | -0.459792 | 2.569548  | -5.310256 |
| H53 | -2.258481 | 5.505293  | -1.604836 |
| H54 | -4.157844 | 3.671430  | -1.067488 |
| H55 | -4.149782 | -1.538121 | -0.528689 |
| H56 | -2.132896 | -3.538484 | -0.564943 |
| H57 | 2.797094  | -3.618580 | -1.850221 |
| H58 | 4.740025  | -1.922117 | -2.383255 |
| H59 | 4.814735  | 3.559977  | -2.268165 |
| H60 | 2.849933  | 5.467385  | -2.467858 |
| H61 | 4.066546  | 4.448491  | 6.173055  |

Warfarin 7-6 Transition State Doublet

|     |           |           |           |
|-----|-----------|-----------|-----------|
| C1  | -0.922706 | 1.756310  | -4.615943 |
| H2  | -1.592944 | 1.177889  | -5.265557 |
| H3  | -1.547210 | 2.259819  | -3.881258 |
| S4  | 0.173887  | 0.547072  | -3.795515 |
| O5  | 0.780084  | 1.287071  | 0.265518  |
| Fe6 | 0.368102  | 1.082477  | -1.450944 |
| N7  | -1.071657 | 2.471112  | -1.498358 |
| N8  | -1.030935 | -0.344938 | -1.080310 |
| N9  | 1.789404  | -0.376827 | -1.633902 |
| N10 | 1.724599  | 2.464479  | -1.968353 |
| C11 | -0.908933 | 3.820593  | -1.719023 |
| C12 | -2.154318 | 4.510015  | -1.543304 |
| C13 | -3.090216 | 3.564855  | -1.253453 |
| C14 | -2.402309 | 2.298262  | -1.224404 |
| C15 | -2.370204 | -0.151426 | -0.887734 |
| C16 | -3.040257 | -1.415595 | -0.651117 |
| C17 | -2.080682 | -2.380593 | -0.705293 |
| C18 | -0.841009 | -1.687494 | -1.003570 |
| C19 | 1.574540  | -1.717110 | -1.514574 |
| C20 | 2.786846  | -2.447277 | -1.777126 |
| C21 | 3.751473  | -1.536387 | -2.069897 |
| C22 | 3.113007  | -0.226660 | -1.958271 |
| C23 | 3.076525  | 2.258060  | -2.059469 |
| C24 | 3.753959  | 3.522414  | -2.233719 |
| C25 | 2.790919  | 4.485837  | -2.289906 |
| C26 | 1.530508  | 3.810647  | -2.108998 |
| C27 | 0.296133  | 4.440748  | -2.008129 |

|     |           |           |           |
|-----|-----------|-----------|-----------|
| H28 | 0.274972  | 5.517533  | -2.109336 |
| C29 | -3.010302 | 1.073945  | -0.948074 |
| H30 | -4.079966 | 1.085485  | -0.783039 |
| C31 | 0.373194  | -2.331024 | -1.210141 |
| H32 | 0.402393  | -3.408123 | -1.111201 |
| C33 | 3.716332  | 1.023138  | -2.069684 |
| H34 | 4.793101  | 1.065283  | -2.146981 |
| C35 | 0.541476  | 2.505294  | 3.477891  |
| H36 | 0.052859  | 2.118341  | 4.360748  |
| C37 | -0.065986 | 2.474323  | 2.257297  |
| H38 | -1.071138 | 2.091494  | 2.140233  |
| C39 | 0.632413  | 2.887065  | 1.063844  |
| H40 | 0.012065  | 3.300108  | 0.283928  |
| C41 | 1.921322  | 3.514860  | 1.230145  |
| H42 | 2.447191  | 3.921938  | 0.374451  |
| C43 | 2.467681  | 3.632445  | 2.490628  |
| O44 | 3.652786  | 4.313966  | 2.630946  |
| C45 | 4.197728  | 4.647952  | 3.871428  |
| O46 | 5.156536  | 5.376361  | 3.854375  |
| C47 | 3.559795  | 4.078643  | 5.055409  |
| C48 | 2.436028  | 3.290443  | 4.917247  |
| O49 | 1.759117  | 2.690243  | 5.907147  |
| H50 | 2.157707  | 2.762780  | 6.766149  |
| C51 | 1.822966  | 3.108320  | 3.628583  |
| H52 | -0.465640 | 2.532739  | -5.259489 |
| H53 | -2.268037 | 5.580615  | -1.600132 |
| H54 | -4.150263 | 3.715480  | -1.073755 |
| H55 | -4.114305 | -1.486674 | -0.516010 |
| H56 | -2.090196 | -3.463786 | -0.533506 |
| H57 | 2.825486  | -3.530269 | -1.807070 |
| H58 | 4.754803  | -1.848450 | -2.366982 |
| H59 | 4.834344  | 3.623822  | -2.271191 |
| H60 | 2.872249  | 5.552903  | -2.464315 |
| H61 | 3.962887  | 4.430406  | 6.047624  |

Warfarin 7-6 Transition State Quartet

|     |           |           |           |
|-----|-----------|-----------|-----------|
| C1  | -0.931861 | 1.765528  | -4.619709 |
| H2  | -1.592956 | 1.170318  | -5.260937 |
| H3  | -1.563007 | 2.271738  | -3.891332 |
| S4  | 0.184546  | 0.587805  | -3.788867 |
| O5  | 0.686651  | 1.385641  | 0.226110  |
| Fe6 | 0.390776  | 1.036898  | -1.462906 |
| N7  | -1.074188 | 2.439973  | -1.544735 |
| N8  | -1.016323 | -0.368728 | -1.096306 |
| N9  | 1.779489  | -0.384218 | -1.653623 |
| N10 | 1.751291  | 2.443986  | -1.955395 |
| C11 | -0.899045 | 3.789532  | -1.741004 |
| C12 | -2.142166 | 4.482184  | -1.556075 |
| C13 | -3.082743 | 3.537821  | -1.270142 |
| C14 | -2.402838 | 2.267286  | -1.256169 |
| C15 | -2.359875 | -0.167197 | -0.906763 |
| C16 | -3.029309 | -1.428927 | -0.662274 |
| C17 | -2.074282 | -2.397809 | -0.714288 |
| C18 | -0.829084 | -1.716602 | -1.018886 |
| C19 | 1.564240  | -1.733677 | -1.536352 |
| C20 | 2.780919  | -2.449782 | -1.793902 |
| C21 | 3.745259  | -1.535281 | -2.084650 |
| C22 | 3.114858  | -0.227945 | -1.976080 |
| C23 | 3.096721  | 2.244546  | -2.051709 |

|     |           |           |           |
|-----|-----------|-----------|-----------|
| C24 | 3.765697  | 3.513257  | -2.228362 |
| C25 | 2.796127  | 4.470165  | -2.282527 |
| C26 | 1.539234  | 3.786740  | -2.098145 |
| C27 | 0.305912  | 4.414776  | -2.011615 |
| H28 | 0.283336  | 5.491177  | -2.104732 |
| C29 | -3.008843 | 1.049097  | -0.972640 |
| H30 | -4.076080 | 1.056355  | -0.798576 |
| C31 | 0.375534  | -2.360867 | -1.229103 |
| H32 | 0.413284  | -3.436501 | -1.131061 |
| C33 | 3.733638  | 1.009102  | -2.075871 |
| H34 | 4.809498  | 1.041449  | -2.150493 |
| C35 | 0.555235  | 2.515465  | 3.488897  |
| H36 | 0.063714  | 2.127748  | 4.370114  |
| C37 | -0.062366 | 2.503941  | 2.279422  |
| H38 | -1.067961 | 2.124340  | 2.163807  |
| C39 | 0.617393  | 2.949398  | 1.076604  |
| H40 | -0.005903 | 3.395831  | 0.321124  |
| C41 | 1.916108  | 3.568115  | 1.250030  |
| H42 | 2.418219  | 4.012927  | 0.400898  |
| C43 | 2.473338  | 3.659332  | 2.504990  |
| O44 | 3.651005  | 4.345964  | 2.650077  |
| C45 | 4.208698  | 4.660078  | 3.891746  |
| O46 | 5.174113  | 5.379541  | 3.875142  |
| C47 | 3.575331  | 4.085874  | 5.073736  |
| C48 | 2.451583  | 3.289841  | 4.930589  |
| O49 | 1.780849  | 2.684159  | 5.916693  |
| H50 | 2.183962  | 2.754368  | 6.773607  |
| C51 | 1.840259  | 3.113843  | 3.643837  |
| H52 | -0.472466 | 2.537152  | -5.267755 |
| H53 | -2.257523 | 5.555644  | -1.602534 |
| H54 | -4.140910 | 3.697824  | -1.080890 |
| H55 | -4.103992 | -1.494879 | -0.520820 |
| H56 | -2.085164 | -3.477689 | -0.536482 |
| H57 | 2.827184  | -3.532764 | -1.814500 |
| H58 | 4.750153  | -1.847085 | -2.374564 |
| H59 | 4.844538  | 3.621010  | -2.269852 |
| H60 | 2.872265  | 5.539456  | -2.456504 |
| H61 | 3.974285  | 4.438624  | 6.066928  |

Warfarin 7-7 Reactant Complex Doublet

|     |           |           |           |
|-----|-----------|-----------|-----------|
| C1  | -0.905479 | 1.700784  | -4.762753 |
| H2  | -1.488675 | 1.093088  | -5.465079 |
| H3  | -1.601262 | 2.140854  | -4.049752 |
| S4  | 0.214694  | 0.538882  | -3.927665 |
| O5  | 0.609154  | 0.946563  | 0.111295  |
| Fe6 | 0.350348  | 0.935342  | -1.511543 |
| N7  | -1.083151 | 2.365518  | -1.559995 |
| N8  | -1.074529 | -0.457386 | -1.260401 |
| N9  | 1.762100  | -0.482933 | -1.778218 |
| N10 | 1.739703  | 2.351163  | -1.967826 |
| C11 | -0.896948 | 3.715885  | -1.701978 |
| C12 | -2.136364 | 4.424656  | -1.537471 |
| C13 | -3.092240 | 3.483537  | -1.307028 |
| C14 | -2.424336 | 2.202482  | -1.322516 |
| C15 | -2.406908 | -0.254069 | -1.060277 |
| C16 | -3.066903 | -1.507958 | -0.758277 |
| C17 | -2.098566 | -2.464769 | -0.743666 |
| C18 | -0.863293 | -1.787375 | -1.083511 |
| C19 | 1.559665  | -1.814193 | -1.591752 |

|     |           |           |           |
|-----|-----------|-----------|-----------|
| C20 | 2.781345  | -2.539672 | -1.808292 |
| C21 | 3.738854  | -1.630784 | -2.137395 |
| C22 | 3.094590  | -0.327300 | -2.079667 |
| C23 | 3.085363  | 2.154961  | -2.114761 |
| C24 | 3.758210  | 3.425162  | -2.284411 |
| C25 | 2.795681  | 4.388394  | -2.278685 |
| C26 | 1.544650  | 3.706364  | -2.060338 |
| C27 | 0.320404  | 4.336844  | -1.930636 |
| H28 | 0.310132  | 5.418441  | -1.982722 |
| C29 | -3.045400 | 0.978518  | -1.102186 |
| H30 | -4.113462 | 0.995561  | -0.925506 |
| C31 | 0.361445  | -2.421401 | -1.237281 |
| H32 | 0.411891  | -3.485562 | -1.047913 |
| C33 | 3.713921  | 0.915650  | -2.170695 |
| H34 | 4.791034  | 0.943816  | -2.255832 |
| C35 | 0.623766  | 2.524932  | 3.735187  |
| H36 | 0.175502  | 1.971703  | 4.554032  |
| C37 | -0.084454 | 2.718020  | 2.564825  |
| H38 | -1.069740 | 2.287675  | 2.441499  |
| C39 | 0.481703  | 3.465287  | 1.522930  |
| H40 | -0.077514 | 3.600732  | 0.609385  |
| C41 | 1.762157  | 3.984477  | 1.627550  |
| H42 | 2.220047  | 4.539230  | 0.816928  |
| C43 | 2.447731  | 3.835121  | 2.830042  |
| O44 | 3.647328  | 4.479566  | 2.953426  |
| C45 | 4.255929  | 4.682065  | 4.186683  |
| O46 | 5.235718  | 5.379651  | 4.202348  |
| C47 | 3.654238  | 3.999852  | 5.323682  |
| C48 | 2.598954  | 3.147959  | 5.159689  |
| O49 | 2.116160  | 2.444595  | 6.210735  |
| H50 | 1.746619  | 1.617126  | 5.909419  |
| C51 | 1.901495  | 3.101926  | 3.893615  |
| H52 | -0.470501 | 2.515549  | -5.364911 |
| H53 | -2.234834 | 5.507122  | -1.567518 |
| H54 | -4.151803 | 3.648233  | -1.133047 |
| H55 | -4.137584 | -1.579936 | -0.610951 |
| H56 | -2.099827 | -3.531011 | -0.512284 |
| H57 | 2.841164  | -3.618421 | -1.792432 |
| H58 | 4.748602  | -1.927718 | -2.419995 |
| H59 | 4.834660  | 3.535063  | -2.370281 |
| H60 | 2.872164  | 5.464221  | -2.442811 |
| H61 | 4.011721  | 4.296688  | 6.325605  |

Warfarin 7-7 Reactant Complex Quartet

|     |           |           |           |
|-----|-----------|-----------|-----------|
| C1  | -0.899165 | 1.708655  | -4.754411 |
| H2  | -1.482727 | 1.096419  | -5.452197 |
| H3  | -1.592184 | 2.149150  | -4.038773 |
| S4  | 0.224749  | 0.551464  | -3.921379 |
| O5  | 0.587757  | 0.962949  | 0.115472  |
| Fe6 | 0.353521  | 0.933824  | -1.504099 |
| N7  | -1.083485 | 2.365383  | -1.564072 |
| N8  | -1.072588 | -0.457424 | -1.251950 |
| N9  | 1.764889  | -0.481912 | -1.768124 |
| N10 | 1.739489  | 2.349574  | -1.969969 |
| C11 | -0.897663 | 3.714520  | -1.704133 |
| C12 | -2.137153 | 4.423666  | -1.540766 |
| C13 | -3.093684 | 3.482075  | -1.311485 |
| C14 | -2.424899 | 2.200576  | -1.326558 |
| C15 | -2.404536 | -0.254295 | -1.053765 |

|     |           |           |           |
|-----|-----------|-----------|-----------|
| C16 | -3.064725 | -1.507470 | -0.752314 |
| C17 | -2.095834 | -2.465100 | -0.736767 |
| C18 | -0.860963 | -1.787253 | -1.075183 |
| C19 | 1.560496  | -1.814243 | -1.585318 |
| C20 | 2.782956  | -2.538748 | -1.806072 |
| C21 | 3.739455  | -1.629135 | -2.134269 |
| C22 | 3.097792  | -0.324965 | -2.072178 |
| C23 | 3.084839  | 2.154925  | -2.116036 |
| C24 | 3.756769  | 3.425173  | -2.287374 |
| C25 | 2.793054  | 4.388092  | -2.282924 |
| C26 | 1.542386  | 3.705410  | -2.063835 |
| C27 | 0.320057  | 4.337242  | -1.932874 |
| H28 | 0.310435  | 5.418237  | -1.984528 |
| C29 | -3.046031 | 0.979338  | -1.103490 |
| H30 | -4.113409 | 0.997776  | -0.929687 |
| C31 | 0.363822  | -2.422368 | -1.233044 |
| H32 | 0.411733  | -3.486213 | -1.049570 |
| C33 | 3.715973  | 0.916292  | -2.166003 |
| H34 | 4.793195  | 0.948798  | -2.252028 |
| C35 | 0.628320  | 2.536485  | 3.737383  |
| H36 | 0.177507  | 1.983461  | 4.554915  |
| C37 | -0.078690 | 2.733245  | 2.567541  |
| H38 | -1.063602 | 2.301152  | 2.441701  |
| C39 | 0.487670  | 3.484080  | 1.527349  |
| H40 | -0.070487 | 3.622738  | 0.614721  |
| C41 | 1.769607  | 3.998577  | 1.634282  |
| H42 | 2.229038  | 4.554867  | 0.823785  |
| C43 | 2.456111  | 3.844894  | 2.834599  |
| O44 | 3.657323  | 4.483620  | 2.958836  |
| C45 | 4.264968  | 4.684338  | 4.192734  |
| O46 | 5.247926  | 5.379799  | 4.210120  |
| C47 | 3.659931  | 4.002911  | 5.328363  |
| C48 | 2.605755  | 3.155035  | 5.162653  |
| O49 | 2.119947  | 2.450490  | 6.213615  |
| H50 | 1.744148  | 1.626356  | 5.910692  |
| C51 | 1.906679  | 3.109941  | 3.897018  |
| H52 | -0.467585 | 2.521474  | -5.361976 |
| H53 | -2.235396 | 5.505602  | -1.569479 |
| H54 | -4.152551 | 3.647484  | -1.134022 |
| H55 | -4.136357 | -1.579915 | -0.608315 |
| H56 | -2.096542 | -3.531652 | -0.506515 |
| H57 | 2.842721  | -3.618108 | -1.792820 |
| H58 | 4.748344  | -1.925641 | -2.421923 |
| H59 | 4.833350  | 3.537221  | -2.369761 |
| H60 | 2.870116  | 5.463459  | -2.445540 |
| H61 | 4.017264  | 4.300159  | 6.330379  |

Warfarin 7-7 Transition State Doublet

|     |           |           |           |
|-----|-----------|-----------|-----------|
| C1  | -0.882257 | 1.677727  | -4.667226 |
| H2  | -1.451959 | 1.022255  | -5.335783 |
| H3  | -1.586908 | 2.132815  | -3.972217 |
| S4  | 0.263021  | 0.571531  | -3.769248 |
| O5  | 0.760266  | 1.250381  | 0.326072  |
| Fe6 | 0.387926  | 1.078672  | -1.395727 |
| N7  | -1.053365 | 2.462145  | -1.474478 |
| N8  | -1.015719 | -0.350548 | -1.057190 |
| N9  | 1.812087  | -0.380715 | -1.588084 |
| N10 | 1.748209  | 2.460580  | -1.901881 |
| C11 | -0.886632 | 3.815327  | -1.663261 |

|     |           |           |           |
|-----|-----------|-----------|-----------|
| C12 | -2.138315 | 4.503071  | -1.521873 |
| C13 | -3.083064 | 3.551086  | -1.278965 |
| C14 | -2.393754 | 2.283805  | -1.246822 |
| C15 | -2.362256 | -0.165699 | -0.909875 |
| C16 | -3.026624 | -1.432938 | -0.671162 |
| C17 | -2.056140 | -2.387413 | -0.664615 |
| C18 | -0.814658 | -1.689241 | -0.936066 |
| C19 | 1.603252  | -1.718026 | -1.442216 |
| C20 | 2.809095  | -2.451641 | -1.721794 |
| C21 | 3.763018  | -1.542204 | -2.055993 |
| C22 | 3.128078  | -0.233433 | -1.947356 |
| C23 | 3.095024  | 2.250254  | -2.047530 |
| C24 | 3.769306  | 3.511055  | -2.247473 |
| C25 | 2.809498  | 4.479688  | -2.256984 |
| C26 | 1.555706  | 3.808845  | -2.028736 |
| C27 | 0.324090  | 4.440480  | -1.910833 |
| H28 | 0.306059  | 5.518457  | -1.995730 |
| C29 | -3.007638 | 1.057957  | -0.996876 |
| H30 | -4.081350 | 1.067014  | -0.862347 |
| C31 | 0.405969  | -2.328395 | -1.111675 |
| H32 | 0.439818  | -3.400930 | -0.978971 |
| C33 | 3.731616  | 1.013952  | -2.083083 |
| H34 | 4.804847  | 1.052889  | -2.206177 |
| C35 | 0.537446  | 2.366219  | 3.611636  |
| H36 | 0.028360  | 1.985182  | 4.492363  |
| C37 | -0.090880 | 2.354154  | 2.397693  |
| H38 | -1.095593 | 1.969638  | 2.294034  |
| C39 | 0.581180  | 2.809639  | 1.201729  |
| H40 | -0.060710 | 3.222402  | 0.436009  |
| C41 | 1.852024  | 3.465949  | 1.371745  |
| H42 | 2.348034  | 3.923088  | 0.523178  |
| C43 | 2.422430  | 3.555535  | 2.626285  |
| O44 | 3.582268  | 4.278752  | 2.769215  |
| C45 | 4.125912  | 4.611462  | 4.012783  |
| O46 | 5.064215  | 5.363734  | 4.012732  |
| C47 | 3.529072  | 3.974835  | 5.181323  |
| C48 | 2.476717  | 3.111786  | 5.032326  |
| O49 | 1.982387  | 2.449508  | 6.110698  |
| H50 | 1.668153  | 1.587263  | 5.839767  |
| C51 | 1.819358  | 2.963362  | 3.761664  |
| H52 | -0.470010 | 2.481967  | -5.310684 |
| H53 | -2.247062 | 5.576941  | -1.566429 |
| H54 | -4.148278 | 3.693607  | -1.122196 |
| H55 | -4.102312 | -1.527030 | -0.576921 |
| H56 | -2.065897 | -3.468884 | -0.478821 |
| H57 | 2.858766  | -3.533030 | -1.763385 |
| H58 | 4.752901  | -1.858714 | -2.382115 |
| H59 | 4.845653  | 3.599441  | -2.341403 |
| H60 | 2.886255  | 5.545050  | -2.437660 |
| H61 | 3.912492  | 4.273222  | 6.189274  |

Warfarin 7-7 Transition State Quartet

|     |           |          |           |
|-----|-----------|----------|-----------|
| C1  | -0.894140 | 1.684260 | -4.668324 |
| H2  | -1.451895 | 1.016849 | -5.333577 |
| H3  | -1.606642 | 2.137746 | -3.979717 |
| S4  | 0.264262  | 0.604050 | -3.763094 |
| O5  | 0.668021  | 1.343140 | 0.282446  |
| Fe6 | 0.408305  | 1.042217 | -1.409724 |
| N7  | -1.053626 | 2.438695 | -1.521972 |

|     |           |           |           |
|-----|-----------|-----------|-----------|
| N8  | -1.001242 | -0.367380 | -1.070667 |
| N9  | 1.805186  | -0.381108 | -1.607245 |
| N10 | 1.773480  | 2.445881  | -1.892273 |
| C11 | -0.876334 | 3.792274  | -1.689084 |
| C12 | -2.126710 | 4.481398  | -1.538406 |
| C13 | -3.073953 | 3.530385  | -1.298132 |
| C14 | -2.390857 | 2.261033  | -1.279604 |
| C15 | -2.353724 | -0.174968 | -0.925354 |
| C16 | -3.016182 | -1.440792 | -0.678745 |
| C17 | -2.048228 | -2.397368 | -0.670167 |
| C18 | -0.801960 | -1.708729 | -0.947617 |
| C19 | 1.596382  | -1.729414 | -1.461615 |
| C20 | 2.806936  | -2.448456 | -1.738802 |
| C21 | 3.758500  | -1.538036 | -2.072374 |
| C22 | 3.131160  | -0.230049 | -1.965859 |
| C23 | 3.115121  | 2.241918  | -2.042283 |
| C24 | 3.781298  | 3.507779  | -2.242487 |
| C25 | 2.815520  | 4.469872  | -2.251784 |
| C26 | 1.564847  | 3.791212  | -2.021820 |
| C27 | 0.333778  | 4.420654  | -1.918569 |
| H28 | 0.314197  | 5.498555  | -1.997982 |
| C29 | -3.003363 | 1.038616  | -1.019322 |
| H30 | -4.075369 | 1.046847  | -0.873940 |
| C31 | 0.411481  | -2.347984 | -1.126916 |
| H32 | 0.452436  | -3.420088 | -0.992545 |
| C33 | 3.748343  | 1.007060  | -2.091306 |
| H34 | 4.821879  | 1.036498  | -2.209249 |
| C35 | 0.544057  | 2.362889  | 3.619517  |
| H36 | 0.034527  | 1.978133  | 4.498337  |
| C37 | -0.095930 | 2.374182  | 2.415450  |
| H38 | -1.102511 | 1.995639  | 2.314743  |
| C39 | 0.555036  | 2.861908  | 1.214757  |
| H40 | -0.091829 | 3.298594  | 0.470299  |
| C41 | 1.834177  | 3.508116  | 1.390526  |
| H42 | 2.308408  | 3.999585  | 0.550002  |
| C43 | 2.417304  | 3.567251  | 2.638353  |
| O44 | 3.570755  | 4.297213  | 2.782861  |
| C45 | 4.125509  | 4.617676  | 4.026976  |
| O46 | 5.064488  | 5.366691  | 4.024745  |
| C47 | 3.534056  | 3.974755  | 5.193253  |
| C48 | 2.484165  | 3.105249  | 5.041541  |
| O49 | 1.992135  | 2.443097  | 6.122622  |
| H50 | 1.671321  | 1.584272  | 5.852648  |
| C51 | 1.829991  | 2.955552  | 3.773866  |
| H52 | -0.477579 | 2.484358  | -5.315357 |
| H53 | -2.237961 | 5.557465  | -1.572259 |
| H54 | -4.138063 | 3.679469  | -1.129412 |
| H55 | -4.092418 | -1.531490 | -0.578577 |
| H56 | -2.058256 | -3.477158 | -0.480872 |
| H57 | 2.861629  | -3.531581 | -1.773231 |
| H58 | 4.753930  | -1.849965 | -2.392963 |
| H59 | 4.856093  | 3.601932  | -2.336562 |
| H60 | 2.885901  | 5.536976  | -2.431970 |
| H61 | 3.917681  | 4.275622  | 6.203002  |

Warfarin 7-8 Reactant Complex Doublet

|    |           |          |           |
|----|-----------|----------|-----------|
| C1 | -1.035683 | 1.973297 | -4.741800 |
| H2 | -1.720082 | 1.429521 | -5.403353 |
| H3 | -1.647481 | 2.459294 | -3.984413 |

|     |           |           |           |
|-----|-----------|-----------|-----------|
| S4  | 0.048190  | 0.705338  | -3.997887 |
| O5  | 0.615845  | 0.944895  | 0.048075  |
| Fe6 | 0.317121  | 0.999723  | -1.565351 |
| N7  | -1.106885 | 2.432483  | -1.560456 |
| N8  | -1.098826 | -0.403322 | -1.308444 |
| N9  | 1.724035  | -0.415502 | -1.877306 |
| N10 | 1.697034  | 2.425483  | -2.008147 |
| C11 | -0.930319 | 3.782680  | -1.708358 |
| C12 | -2.174144 | 4.484370  | -1.548015 |
| C13 | -3.126621 | 3.533969  | -1.335844 |
| C14 | -2.450413 | 2.257796  | -1.348616 |
| C15 | -2.428062 | -0.203025 | -1.095411 |
| C16 | -3.078787 | -1.452616 | -0.759650 |
| C17 | -2.106094 | -2.408027 | -0.747873 |
| C18 | -0.876785 | -1.729852 | -1.114176 |
| C19 | 1.540952  | -1.745928 | -1.661928 |
| C20 | 2.779494  | -2.454349 | -1.851609 |
| C21 | 3.727873  | -1.534496 | -2.180599 |
| C22 | 3.061448  | -0.243104 | -2.143833 |
| C23 | 3.041458  | 2.234695  | -2.145083 |
| C24 | 3.717527  | 3.500073  | -2.321908 |
| C25 | 2.755185  | 4.462755  | -2.335332 |
| C26 | 1.502733  | 3.781166  | -2.109695 |
| C27 | 0.280256  | 4.410913  | -1.966623 |
| H28 | 0.263858  | 5.490767  | -2.030947 |
| C29 | -3.070183 | 1.029430  | -1.153222 |
| H30 | -4.143782 | 1.043600  | -1.019690 |
| C31 | 0.353255  | -2.356384 | -1.273884 |
| H32 | 0.416168  | -3.412167 | -1.049096 |
| C33 | 3.676951  | 0.999670  | -2.196638 |
| H34 | 4.755746  | 1.037489  | -2.241477 |
| C35 | 0.624273  | 2.590334  | 3.623426  |
| H36 | 0.137477  | 2.057182  | 4.435412  |
| C37 | -0.026909 | 2.763304  | 2.417776  |
| H38 | -1.001837 | 2.327218  | 2.246976  |
| C39 | 0.587188  | 3.503730  | 1.396713  |
| H40 | 0.072098  | 3.618911  | 0.458954  |
| C41 | 1.853590  | 4.039543  | 1.555879  |
| H42 | 2.344368  | 4.590774  | 0.761084  |
| C43 | 2.483653  | 3.904650  | 2.788844  |
| O44 | 3.669570  | 4.559780  | 2.964610  |
| C45 | 4.211827  | 4.780674  | 4.228584  |
| O46 | 5.219502  | 5.433795  | 4.286408  |
| C47 | 3.514013  | 4.157906  | 5.342550  |
| C48 | 2.508325  | 3.264535  | 5.131825  |
| O49 | 1.986943  | 2.562759  | 6.165953  |
| H50 | 1.683760  | 1.710794  | 5.857632  |
| C51 | 1.889662  | 3.174769  | 3.829515  |
| H52 | -0.578544 | 2.760075  | -5.371930 |
| H53 | -2.277752 | 5.566517  | -1.561348 |
| H54 | -4.187802 | 3.686782  | -1.171176 |
| H55 | -4.140829 | -1.525770 | -0.551966 |
| H56 | -2.105150 | -3.473645 | -0.511515 |
| H57 | 2.861167  | -3.528618 | -1.801155 |
| H58 | 4.753656  | -1.798104 | -2.454903 |
| H59 | 4.795617  | 3.594298  | -2.398340 |
| H60 | 2.833763  | 5.533445  | -2.518152 |
| H61 | 3.803615  | 4.455956  | 6.360126  |

Warfarin 7-8 Reactant Complex Quartet



|     |           |           |           |
|-----|-----------|-----------|-----------|
| C1  | -1.025092 | 1.983433  | -4.734508 |
| H2  | -1.712441 | 1.433250  | -5.388185 |
| H3  | -1.632135 | 2.471938  | -3.975129 |
| S4  | 0.066211  | 0.723406  | -3.992211 |
| O5  | 0.587926  | 0.972539  | 0.054881  |
| Fe6 | 0.316818  | 0.991557  | -1.558727 |
| N7  | -1.111121 | 2.425236  | -1.561732 |
| N8  | -1.099788 | -0.411621 | -1.303252 |
| N9  | 1.721900  | -0.421287 | -1.866442 |
| N10 | 1.695908  | 2.416222  | -2.007461 |
| C11 | -0.933887 | 3.772872  | -1.707800 |
| C12 | -2.177329 | 4.476003  | -1.546229 |
| C13 | -3.130371 | 3.525901  | -1.334840 |
| C14 | -2.455535 | 2.248706  | -1.349161 |
| C15 | -2.428154 | -0.210906 | -1.093298 |
| C16 | -3.079105 | -1.460593 | -0.756602 |
| C17 | -2.107342 | -2.415739 | -0.743853 |
| C18 | -0.876783 | -1.739554 | -1.109148 |
| C19 | 1.538391  | -1.752599 | -1.656851 |
| C20 | 2.776575  | -2.460105 | -1.851480 |
| C21 | 3.724429  | -1.541254 | -2.179397 |
| C22 | 3.060570  | -0.249012 | -2.137531 |
| C23 | 3.040010  | 2.226461  | -2.142100 |
| C24 | 3.714229  | 3.492666  | -2.321478 |
| C25 | 2.751295  | 4.454880  | -2.337397 |
| C26 | 1.498333  | 3.773670  | -2.111878 |
| C27 | 0.277504  | 4.402431  | -1.969070 |
| H28 | 0.259858  | 5.481215  | -2.032098 |
| C29 | -3.073817 | 1.021287  | -1.156793 |
| H30 | -4.147625 | 1.033181  | -1.028037 |
| C31 | 0.350072  | -2.365723 | -1.271847 |
| H32 | 0.413942  | -3.422851 | -1.053803 |
| C33 | 3.677088  | 0.992447  | -2.190545 |
| H34 | 4.755361  | 1.029670  | -2.235405 |
| C35 | 0.630615  | 2.602464  | 3.621504  |
| H36 | 0.145251  | 2.062727  | 4.427983  |
| C37 | -0.019286 | 2.783460  | 2.416762  |
| H38 | -0.992604 | 2.345110  | 2.242612  |
| C39 | 0.592043  | 3.531213  | 1.402098  |
| H40 | 0.073568  | 3.658660  | 0.466838  |
| C41 | 1.858721  | 4.067604  | 1.563429  |
| H42 | 2.345176  | 4.626464  | 0.773164  |
| C43 | 2.491351  | 3.923711  | 2.794502  |
| O44 | 3.678840  | 4.573596  | 2.973560  |
| C45 | 4.222410  | 4.786279  | 4.237891  |
| O46 | 5.232074  | 5.438615  | 4.299244  |
| C47 | 3.524158  | 4.158588  | 5.348830  |
| C48 | 2.515977  | 3.270592  | 5.136234  |
| O49 | 1.993295  | 2.564347  | 6.164365  |
| H50 | 1.688486  | 1.715370  | 5.852079  |
| C51 | 1.896508  | 3.188371  | 3.832913  |
| H52 | -0.573511 | 2.767593  | -5.372218 |
| H53 | -2.278493 | 5.558627  | -1.558670 |
| H54 | -4.191012 | 3.680479  | -1.169738 |
| H55 | -4.141860 | -1.532247 | -0.550161 |
| H56 | -2.106910 | -3.482441 | -0.507271 |
| H57 | 2.859008  | -3.535456 | -1.804060 |
| H58 | 4.749443  | -1.804870 | -2.455016 |
| H59 | 4.792535  | 3.588082  | -2.396291 |

|     |          |          |           |
|-----|----------|----------|-----------|
| H60 | 2.830558 | 5.525755 | -2.519152 |
| H61 | 3.812460 | 4.457199 | 6.368363  |

Warfarin 7-8 Transition State Doublet

|     |           |           |           |
|-----|-----------|-----------|-----------|
| C1  | -1.009925 | 1.947077  | -4.650445 |
| H2  | -1.680444 | 1.359249  | -5.287463 |
| H3  | -1.633058 | 2.447967  | -3.912538 |
| S4  | 0.095917  | 0.722696  | -3.840921 |
| O5  | 0.801358  | 1.288577  | 0.261763  |
| Fe6 | 0.360953  | 1.137417  | -1.455211 |
| N7  | -1.072929 | 2.522535  | -1.482985 |
| N8  | -1.030231 | -0.302676 | -1.090741 |
| N9  | 1.779257  | -0.323313 | -1.676534 |
| N10 | 1.708826  | 2.524176  | -1.960116 |
| C11 | -0.913868 | 3.877187  | -1.672442 |
| C12 | -2.171483 | 4.555105  | -1.533600 |
| C13 | -3.111147 | 3.593489  | -1.312640 |
| C14 | -2.413867 | 2.331291  | -1.280414 |
| C15 | -2.377084 | -0.121592 | -0.942227 |
| C16 | -3.036234 | -1.386468 | -0.678721 |
| C17 | -2.062367 | -2.339254 | -0.671372 |
| C18 | -0.822851 | -1.639842 | -0.959613 |
| C19 | 1.588495  | -1.661591 | -1.504205 |
| C20 | 2.809635  | -2.381948 | -1.762760 |
| C21 | 3.754238  | -1.464157 | -2.101724 |
| C22 | 3.098500  | -0.164786 | -2.011198 |
| C23 | 3.055429  | 2.314814  | -2.093651 |
| C24 | 3.733838  | 3.570717  | -2.294598 |
| C25 | 2.776965  | 4.539901  | -2.318563 |
| C26 | 1.519416  | 3.873187  | -2.085639 |
| C27 | 0.290388  | 4.506012  | -1.945503 |
| H28 | 0.269012  | 5.584513  | -2.029070 |
| C29 | -3.025109 | 1.099322  | -1.052364 |
| H30 | -4.103008 | 1.103774  | -0.961490 |
| C31 | 0.399982  | -2.275591 | -1.145372 |
| H32 | 0.441562  | -3.345134 | -0.992708 |
| C33 | 3.698854  | 1.084532  | -2.121227 |
| H34 | 4.775009  | 1.133056  | -2.207316 |
| C35 | 0.524219  | 2.425114  | 3.532964  |
| H36 | -0.006336 | 2.058119  | 4.404865  |
| C37 | -0.065082 | 2.408934  | 2.301311  |
| H38 | -1.069819 | 2.029239  | 2.166834  |
| C39 | 0.644225  | 2.853823  | 1.124677  |
| H40 | 0.027222  | 3.286705  | 0.350825  |
| C41 | 1.921301  | 3.499054  | 1.322437  |
| H42 | 2.440665  | 3.950340  | 0.486749  |
| C43 | 2.449602  | 3.602056  | 2.594370  |
| O44 | 3.601195  | 4.328142  | 2.773020  |
| C45 | 4.083332  | 4.697002  | 4.036309  |
| O46 | 5.041172  | 5.416210  | 4.065315  |
| C47 | 3.401910  | 4.120185  | 5.189396  |
| C48 | 2.390264  | 3.214978  | 5.008439  |
| O49 | 1.864545  | 2.560500  | 6.074282  |
| H50 | 1.623586  | 1.674878  | 5.811214  |
| C51 | 1.803154  | 3.024549  | 3.712583  |
| H52 | -0.573900 | 2.728270  | -5.315347 |
| H53 | -2.285230 | 5.628871  | -1.559444 |
| H54 | -4.178595 | 3.722621  | -1.164757 |
| H55 | -4.107135 | -1.486365 | -0.529515 |

|     |           |           |           |
|-----|-----------|-----------|-----------|
| H56 | -2.071372 | -3.420205 | -0.481095 |
| H57 | 2.875129  | -3.463450 | -1.768808 |
| H58 | 4.761041  | -1.746075 | -2.421889 |
| H59 | 4.812305  | 3.640833  | -2.378004 |
| H60 | 2.856578  | 5.599846  | -2.516142 |
| H61 | 3.719566  | 4.425773  | 6.215209  |

Warfarin 7-8 Transition State Quartet

|     |           |           |           |
|-----|-----------|-----------|-----------|
| C1  | -1.017248 | 1.948709  | -4.651292 |
| H2  | -1.676111 | 1.342138  | -5.280853 |
| H3  | -1.647905 | 2.449271  | -3.918768 |
| S4  | 0.111203  | 0.758086  | -3.828522 |
| O5  | 0.707244  | 1.377306  | 0.227696  |
| Fe6 | 0.386557  | 1.092740  | -1.468723 |
| N7  | -1.069971 | 2.493948  | -1.523752 |
| N8  | -1.011911 | -0.326045 | -1.108988 |
| N9  | 1.776040  | -0.329566 | -1.690276 |
| N10 | 1.741789  | 2.503529  | -1.942155 |
| C11 | -0.898636 | 3.848099  | -1.689509 |
| C12 | -2.154726 | 4.528455  | -1.543084 |
| C13 | -3.098843 | 3.567519  | -1.328430 |
| C14 | -2.408556 | 2.302201  | -1.311705 |
| C15 | -2.364385 | -0.136373 | -0.963320 |
| C16 | -3.021397 | -1.399559 | -0.690012 |
| C17 | -2.050998 | -2.354624 | -0.679229 |
| C18 | -0.806302 | -1.666385 | -0.973997 |
| C19 | 1.584393  | -1.677923 | -1.519541 |
| C20 | 2.810072  | -2.384530 | -1.774588 |
| C21 | 3.754755  | -1.463483 | -2.107926 |
| C22 | 3.107426  | -0.165761 | -2.019555 |
| C23 | 3.081642  | 2.300856  | -2.078776 |
| C24 | 3.752312  | 3.562130  | -2.280462 |
| C25 | 2.788583  | 4.524661  | -2.303138 |
| C26 | 1.534295  | 3.849252  | -2.069052 |
| C27 | 0.306479  | 4.480435  | -1.942761 |
| H28 | 0.284606  | 5.558514  | -2.019065 |
| C29 | -3.019108 | 1.074043  | -1.078542 |
| H30 | -4.095564 | 1.075193  | -0.979852 |
| C31 | 0.408852  | -2.302958 | -1.159868 |
| H32 | 0.458783  | -3.371179 | -1.005364 |
| C33 | 3.722806  | 1.071592  | -2.117989 |
| H34 | 4.798709  | 1.110217  | -2.196521 |
| C35 | 0.535917  | 2.418750  | 3.547775  |
| H36 | 0.005181  | 2.046519  | 4.419509  |
| C37 | -0.069166 | 2.424878  | 2.329722  |
| H38 | -1.074711 | 2.051525  | 2.199176  |
| C39 | 0.618867  | 2.903907  | 1.143627  |
| H40 | -0.003872 | 3.360336  | 0.391738  |
| C41 | 1.903347  | 3.540521  | 1.346799  |
| H42 | 2.397575  | 4.029188  | 0.517344  |
| C43 | 2.446233  | 3.615001  | 2.609926  |
| O44 | 3.589307  | 4.349631  | 2.790219  |
| C45 | 4.083666  | 4.703485  | 4.054469  |
| O46 | 5.043385  | 5.421476  | 4.081372  |
| C47 | 3.409108  | 4.116428  | 5.205748  |
| C48 | 2.407490  | 3.204333  | 5.024949  |
| O49 | 1.887501  | 2.544753  | 6.090090  |
| H50 | 1.640837  | 1.661692  | 5.828013  |
| C51 | 1.816896  | 3.012713  | 3.730856  |

|     |           |           |           |
|-----|-----------|-----------|-----------|
| H52 | -0.582581 | 2.725351  | -5.323541 |
| H53 | -2.272036 | 5.604514  | -1.559544 |
| H54 | -4.165951 | 3.703111  | -1.174678 |
| H55 | -4.092388 | -1.498247 | -0.536188 |
| H56 | -2.063312 | -3.434283 | -0.483290 |
| H57 | 2.884154  | -3.466069 | -1.781796 |
| H58 | 4.764741  | -1.746210 | -2.419975 |
| H59 | 4.829177  | 3.637661  | -2.362189 |
| H60 | 2.862754  | 5.586809  | -2.499837 |
| H61 | 3.726480  | 4.425842  | 6.231821  |

Warfarin 7-9 Reactant Complex Doublet

|     |           |           |           |
|-----|-----------|-----------|-----------|
| C1  | -0.751127 | 1.990302  | -4.822178 |
| H2  | -1.499762 | 1.404504  | -5.368884 |
| H3  | -1.285430 | 2.561871  | -4.065403 |
| S4  | 0.358537  | 0.785785  | -4.035260 |
| O5  | 0.618446  | 0.865693  | 0.050767  |
| Fe6 | 0.370781  | 0.970939  | -1.565163 |
| N7  | -1.052789 | 2.415809  | -1.587440 |
| N8  | -1.065719 | -0.421634 | -1.364791 |
| N9  | 1.775982  | -0.438627 | -1.863537 |
| N10 | 1.763994  | 2.402229  | -1.955750 |
| C11 | -0.868354 | 3.765746  | -1.731125 |
| C12 | -2.110167 | 4.471970  | -1.586416 |
| C13 | -3.068222 | 3.528091  | -1.374671 |
| C14 | -2.399517 | 2.248303  | -1.377842 |
| C15 | -2.386679 | -0.208637 | -1.109730 |
| C16 | -3.036514 | -1.449945 | -0.741066 |
| C17 | -2.072611 | -2.413701 | -0.753392 |
| C18 | -0.846349 | -1.749310 | -1.155127 |
| C19 | 1.575303  | -1.771828 | -1.685907 |
| C20 | 2.807659  | -2.488077 | -1.886435 |
| C21 | 3.767270  | -1.568692 | -2.187581 |
| C22 | 3.117160  | -0.270129 | -2.113834 |
| C23 | 3.111108  | 2.206967  | -2.070235 |
| C24 | 3.788812  | 3.473687  | -2.233543 |
| C25 | 2.827833  | 4.438124  | -2.269561 |
| C26 | 1.570990  | 3.760178  | -2.067084 |
| C27 | 0.349614  | 4.392251  | -1.957806 |
| H28 | 0.336126  | 5.472063  | -2.034549 |
| C29 | -3.022848 | 1.026754  | -1.161875 |
| H30 | -4.092632 | 1.049825  | -1.001902 |
| C31 | 0.379693  | -2.381049 | -1.318012 |
| H32 | 0.436645  | -3.439891 | -1.103692 |
| C33 | 3.741749  | 0.971134  | -2.130069 |
| H34 | 4.821482  | 1.007542  | -2.157624 |
| C35 | 0.553625  | 2.495064  | 3.701269  |
| H36 | 0.123138  | 1.946887  | 4.530956  |
| C37 | -0.162272 | 2.638724  | 2.526790  |
| H38 | -1.137879 | 2.181675  | 2.418582  |
| C39 | 0.380294  | 3.374303  | 1.466798  |
| H40 | -0.181665 | 3.466113  | 0.551305  |
| C41 | 1.653238  | 3.914221  | 1.546004  |
| H42 | 2.103457  | 4.441026  | 0.713294  |
| C43 | 2.333843  | 3.837439  | 2.759629  |
| O44 | 3.503343  | 4.530537  | 2.862410  |
| C45 | 4.082658  | 4.831939  | 4.093890  |
| O46 | 5.050153  | 5.538492  | 4.077086  |
| C47 | 3.459289  | 4.216621  | 5.262851  |

|     |           |           |           |
|-----|-----------|-----------|-----------|
| C48 | 2.466227  | 3.294788  | 5.127906  |
| O49 | 2.002786  | 2.621902  | 6.208390  |
| H50 | 1.648255  | 1.774897  | 5.942703  |
| C51 | 1.803768  | 3.132601  | 3.849837  |
| H52 | -0.330555 | 2.701619  | -5.557832 |
| H53 | -2.213348 | 5.554255  | -1.599697 |
| H54 | -4.126756 | 3.696702  | -1.212194 |
| H55 | -4.094652 | -1.511797 | -0.501081 |
| H56 | -2.079927 | -3.481522 | -0.517305 |
| H57 | 2.875478  | -3.564692 | -1.863353 |
| H58 | 4.785137  | -1.839513 | -2.472593 |
| H59 | 4.866830  | 3.569361  | -2.290272 |
| H60 | 2.903390  | 5.510327  | -2.459503 |
| H61 | 3.787910  | 4.584360  | 6.253118  |

Warfarin 7-9 Reactant Complex Quartet

|     |           |           |           |
|-----|-----------|-----------|-----------|
| C1  | -0.746445 | 2.001823  | -4.822655 |
| H2  | -1.494424 | 1.410894  | -5.364052 |
| H3  | -1.280895 | 2.575821  | -4.067244 |
| S4  | 0.369969  | 0.805064  | -4.037062 |
| O5  | 0.583964  | 0.910527  | 0.048073  |
| Fe6 | 0.372799  | 0.970840  | -1.570057 |
| N7  | -1.056016 | 2.413360  | -1.605324 |
| N8  | -1.063275 | -0.425366 | -1.367279 |
| N9  | 1.777080  | -0.440653 | -1.854030 |
| N10 | 1.767439  | 2.397918  | -1.964679 |
| C11 | -0.868596 | 3.762423  | -1.739906 |
| C12 | -2.109898 | 4.469128  | -1.585126 |
| C13 | -3.068138 | 3.525625  | -1.373980 |
| C14 | -2.402000 | 2.244407  | -1.388326 |
| C15 | -2.385019 | -0.212222 | -1.117700 |
| C16 | -3.035143 | -1.453676 | -0.748121 |
| C17 | -2.071937 | -2.417638 | -0.757237 |
| C18 | -0.844786 | -1.754322 | -1.156728 |
| C19 | 1.575343  | -1.774627 | -1.682866 |
| C20 | 2.805803  | -2.491544 | -1.890712 |
| C21 | 3.765870  | -1.572633 | -2.192149 |
| C22 | 3.118037  | -0.273323 | -2.113291 |
| C23 | 3.114058  | 2.202918  | -2.074024 |
| C24 | 3.791336  | 3.470887  | -2.232913 |
| C25 | 2.829213  | 4.435084  | -2.270020 |
| C26 | 1.571177  | 3.756717  | -2.073782 |
| C27 | 0.351071  | 4.388251  | -1.963895 |
| H28 | 0.340226  | 5.469381  | -2.029491 |
| C29 | -3.023524 | 1.022221  | -1.175302 |
| H30 | -4.093909 | 1.040671  | -1.017799 |
| C31 | 0.378319  | -2.387022 | -1.322545 |
| H32 | 0.432239  | -3.449325 | -1.128160 |
| C33 | 3.744329  | 0.965607  | -2.133056 |
| H34 | 4.823764  | 0.998041  | -2.167045 |
| C35 | 0.554155  | 2.515709  | 3.705329  |
| H36 | 0.126967  | 1.960693  | 4.532495  |
| C37 | -0.166403 | 2.669416  | 2.536048  |
| H38 | -1.142080 | 2.214312  | 2.426319  |
| C39 | 0.372218  | 3.413873  | 1.478706  |
| H40 | -0.194688 | 3.514385  | 0.566654  |
| C41 | 1.645699  | 3.951644  | 1.559569  |
| H42 | 2.088628  | 4.492415  | 0.731183  |
| C43 | 2.333615  | 3.859676  | 2.765900  |

|     |           |           |           |
|-----|-----------|-----------|-----------|
| O44 | 3.508789  | 4.545699  | 2.869101  |
| C45 | 4.092631  | 4.834722  | 4.100341  |
| O46 | 5.064815  | 5.537799  | 4.085160  |
| C47 | 3.470468  | 4.217678  | 5.268148  |
| C48 | 2.472587  | 3.297376  | 5.130268  |
| O49 | 2.006105  | 2.625193  | 6.209581  |
| H50 | 1.645559  | 1.780115  | 5.941878  |
| C51 | 1.807429  | 3.146879  | 3.854043  |
| H52 | -0.328144 | 2.711752  | -5.560606 |
| H53 | -2.211807 | 5.550980  | -1.597696 |
| H54 | -4.126423 | 3.695421  | -1.210585 |
| H55 | -4.092858 | -1.513980 | -0.504526 |
| H56 | -2.077726 | -3.485054 | -0.517615 |
| H57 | 2.874430  | -3.568861 | -1.865198 |
| H58 | 4.785976  | -1.843945 | -2.475852 |
| H59 | 4.868956  | 3.568000  | -2.290217 |
| H60 | 2.903421  | 5.506255  | -2.459467 |
| H61 | 3.796185  | 4.586533  | 6.258732  |

Warfarin 7-9 Transition State Doublet

|     |           |           |           |
|-----|-----------|-----------|-----------|
| C1  | -0.737883 | 1.959463  | -4.748351 |
| H2  | -1.469148 | 1.344424  | -5.285173 |
| H3  | -1.290890 | 2.540041  | -4.012160 |
| S4  | 0.380642  | 0.783710  | -3.906221 |
| O5  | 0.740500  | 1.257012  | 0.271693  |
| Fe6 | 0.402572  | 1.112833  | -1.451811 |
| N7  | -1.030943 | 2.502588  | -1.530322 |
| N8  | -1.005678 | -0.320162 | -1.148945 |
| N9  | 1.820501  | -0.346551 | -1.653584 |
| N10 | 1.768129  | 2.498098  | -1.919879 |
| C11 | -0.861291 | 3.855499  | -1.708042 |
| C12 | -2.113689 | 4.540619  | -1.574751 |
| C13 | -3.060508 | 3.587173  | -1.353359 |
| C14 | -2.374681 | 2.320439  | -1.320151 |
| C15 | -2.346120 | -0.126783 | -0.962354 |
| C16 | -3.006634 | -1.383928 | -0.666168 |
| C17 | -2.041033 | -2.345393 | -0.681387 |
| C18 | -0.802160 | -1.659228 | -1.002367 |
| C19 | 1.613631  | -1.686912 | -1.521578 |
| C20 | 2.828179  | -2.413017 | -1.794923 |
| C21 | 3.783369  | -1.497355 | -2.106308 |
| C22 | 3.144909  | -0.192867 | -1.978276 |
| C23 | 3.117778  | 2.286348  | -2.026407 |
| C24 | 3.797548  | 3.543799  | -2.216060 |
| C25 | 2.841502  | 4.513567  | -2.263792 |
| C26 | 1.579937  | 3.849025  | -2.057136 |
| C27 | 0.352219  | 4.482641  | -1.949792 |
| H28 | 0.336266  | 5.561454  | -2.038810 |
| C29 | -2.988974 | 1.096699  | -1.067348 |
| H30 | -4.064452 | 1.110400  | -0.945458 |
| C31 | 0.415456  | -2.299945 | -1.185950 |
| H32 | 0.451345  | -3.372565 | -1.050178 |
| C33 | 3.755731  | 1.054344  | -2.056861 |
| H34 | 4.833069  | 1.097585  | -2.131153 |
| C35 | 0.494130  | 2.362157  | 3.578686  |
| H36 | -0.002586 | 1.966108  | 4.458565  |
| C37 | -0.130816 | 2.320562  | 2.365522  |
| H38 | -1.127289 | 1.911546  | 2.266186  |
| C39 | 0.520432  | 2.797503  | 1.168483  |

|     |           |           |           |
|-----|-----------|-----------|-----------|
| H40 | -0.135734 | 3.196039  | 0.407373  |
| C41 | 1.772970  | 3.487874  | 1.333870  |
| H42 | 2.254561  | 3.960686  | 0.487800  |
| C43 | 2.334762  | 3.608721  | 2.589444  |
| O44 | 3.464881  | 4.375326  | 2.717823  |
| C45 | 3.979600  | 4.771801  | 3.956203  |
| O46 | 4.913239  | 5.523949  | 3.937104  |
| C47 | 3.358083  | 4.189670  | 5.141766  |
| C48 | 2.360588  | 3.257987  | 5.012299  |
| O49 | 1.876509  | 2.622529  | 6.110384  |
| H50 | 1.578802  | 1.745747  | 5.870960  |
| C51 | 1.748903  | 3.017332  | 3.732599  |
| H52 | -0.329702 | 2.669641  | -5.504071 |
| H53 | -2.224019 | 5.614457  | -1.598947 |
| H54 | -4.124613 | 3.731243  | -1.204725 |
| H55 | -4.073749 | -1.470255 | -0.479254 |
| H56 | -2.055983 | -3.426540 | -0.491225 |
| H57 | 2.878682  | -3.495961 | -1.823158 |
| H58 | 4.784929  | -1.785257 | -2.436525 |
| H59 | 4.875838  | 3.614797  | -2.282306 |
| H60 | 2.918732  | 5.574809  | -2.465484 |
| H61 | 3.708211  | 4.555505  | 6.139540  |

Warfarin 7-9 Transition State Quartet

|     |           |           |           |
|-----|-----------|-----------|-----------|
| C1  | -0.757546 | 1.963544  | -4.737684 |
| H2  | -1.479879 | 1.339773  | -5.273189 |
| H3  | -1.317230 | 2.544192  | -4.006162 |
| S4  | 0.377634  | 0.815017  | -3.884517 |
| O5  | 0.649284  | 1.296960  | 0.234961  |
| Fe6 | 0.422993  | 1.079319  | -1.468847 |
| N7  | -1.026734 | 2.487514  | -1.565577 |
| N8  | -0.993125 | -0.334146 | -1.162204 |
| N9  | 1.815714  | -0.343626 | -1.669467 |
| N10 | 1.795091  | 2.492540  | -1.887992 |
| C11 | -0.848401 | 3.843454  | -1.724265 |
| C12 | -2.099790 | 4.528466  | -1.583668 |
| C13 | -3.049183 | 3.573982  | -1.364425 |
| C14 | -2.367022 | 2.306002  | -1.344026 |
| C15 | -2.338290 | -0.132345 | -0.974380 |
| C16 | -2.997095 | -1.389188 | -0.669020 |
| C17 | -2.035323 | -2.352465 | -0.681347 |
| C18 | -0.792377 | -1.673781 | -1.008677 |
| C19 | 1.608439  | -1.692604 | -1.534079 |
| C20 | 2.826369  | -2.409086 | -1.805245 |
| C21 | 3.782100  | -1.489349 | -2.118660 |
| C22 | 3.149615  | -0.186796 | -1.992010 |
| C23 | 3.137033  | 2.284339  | -2.006588 |
| C24 | 3.812889  | 3.543475  | -2.203326 |
| C25 | 2.851921  | 4.509136  | -2.251206 |
| C26 | 1.593398  | 3.837480  | -2.036158 |
| C27 | 0.365171  | 4.471768  | -1.947428 |
| H28 | 0.349434  | 5.549798  | -2.035878 |
| C29 | -2.981767 | 1.084425  | -1.084063 |
| H30 | -4.055193 | 1.099854  | -0.953543 |
| C31 | 0.423789  | -2.312262 | -1.192475 |
| H32 | 0.465496  | -3.383137 | -1.048270 |
| C33 | 3.771718  | 1.050742  | -2.056858 |
| H34 | 4.847833  | 1.086247  | -2.132758 |
| C35 | 0.487431  | 2.363747  | 3.572280  |

|     |           |           |           |
|-----|-----------|-----------|-----------|
| H36 | -0.010334 | 1.966509  | 4.449737  |
| C37 | -0.144654 | 2.334307  | 2.363457  |
| H38 | -1.140744 | 1.930852  | 2.262713  |
| C39 | 0.500856  | 2.821518  | 1.161295  |
| H40 | -0.151130 | 3.225899  | 0.406355  |
| C41 | 1.764664  | 3.490196  | 1.330185  |
| H42 | 2.240935  | 3.972328  | 0.485336  |
| C43 | 2.332333  | 3.598784  | 2.580698  |
| O44 | 3.462891  | 4.359301  | 2.709196  |
| C45 | 3.976588  | 4.763889  | 3.947428  |
| O46 | 4.908389  | 5.521402  | 3.922277  |
| C47 | 3.357240  | 4.184426  | 5.133122  |
| C48 | 2.358237  | 3.253764  | 5.005487  |
| O49 | 1.872106  | 2.621771  | 6.104743  |
| H50 | 1.576473  | 1.745669  | 5.867186  |
| C51 | 1.746446  | 3.009117  | 3.728140  |
| H52 | -0.342406 | 2.670858  | -5.493230 |
| H53 | -2.214103 | 5.603369  | -1.602063 |
| H54 | -4.113090 | 3.721607  | -1.210184 |
| H55 | -4.065178 | -1.472076 | -0.481439 |
| H56 | -2.051125 | -3.433870 | -0.489092 |
| H57 | 2.879038  | -3.491565 | -1.827235 |
| H58 | 4.786509  | -1.776724 | -2.445607 |
| H59 | 4.889208  | 3.616580  | -2.279106 |
| H60 | 2.923522  | 5.570717  | -2.459076 |
| H61 | 3.707934  | 4.551643  | 6.131230  |

Warfarin 7-10 Reactant Complex Doublet

|     |           |           |           |
|-----|-----------|-----------|-----------|
| C1  | -0.946032 | 1.780434  | -4.699483 |
| H2  | -1.634834 | 1.248733  | -5.369762 |
| H3  | -1.554336 | 2.271255  | -3.943150 |
| S4  | 0.123825  | 0.519775  | -3.942522 |
| O5  | 0.598435  | 0.974560  | 0.084407  |
| Fe6 | 0.321824  | 0.940421  | -1.534044 |
| N7  | -1.109147 | 2.374565  | -1.568592 |
| N8  | -1.100057 | -0.451022 | -1.264461 |
| N9  | 1.729611  | -0.478614 | -1.806661 |
| N10 | 1.706348  | 2.356229  | -2.010758 |
| C11 | -0.930097 | 3.717546  | -1.764926 |
| C12 | -2.161000 | 4.430871  | -1.565640 |
| C13 | -3.107153 | 3.497263  | -1.271421 |
| C14 | -2.440052 | 2.217511  | -1.279308 |
| C15 | -2.421316 | -0.238978 | -1.013318 |
| C16 | -3.086640 | -1.491147 | -0.721013 |
| C17 | -2.132953 | -2.462756 | -0.780707 |
| C18 | -0.902860 | -1.788418 | -1.146250 |
| C19 | 1.517916  | -1.814145 | -1.665893 |
| C20 | 2.744042  | -2.537407 | -1.867648 |
| C21 | 3.715818  | -1.623790 | -2.134597 |
| C22 | 3.072193  | -0.318489 | -2.062956 |
| C23 | 3.055947  | 2.165766  | -2.093078 |
| C24 | 3.733164  | 3.437081  | -2.245949 |
| C25 | 2.766726  | 4.395278  | -2.307184 |
| C26 | 1.507696  | 3.709703  | -2.139722 |
| C27 | 0.279535  | 4.336215  | -2.049668 |
| H28 | 0.261389  | 5.414965  | -2.136571 |
| C29 | -3.054081 | 0.996315  | -1.026191 |
| H30 | -4.116553 | 1.015947  | -0.819551 |
| C31 | 0.314086  | -2.428954 | -1.347652 |



|     |           |           |           |
|-----|-----------|-----------|-----------|
| H32 | 0.356634  | -3.501409 | -1.214251 |
| C33 | 3.689281  | 0.925317  | -2.117671 |
| H34 | 4.768428  | 0.960258  | -2.153852 |
| C35 | 0.658632  | 2.707282  | 3.506227  |
| H36 | 0.218211  | 2.149505  | 4.322464  |
| C37 | -0.007685 | 2.888411  | 2.312852  |
| H38 | -0.990273 | 2.460880  | 2.157226  |
| C39 | 0.604054  | 3.609968  | 1.278389  |
| H40 | 0.073518  | 3.734868  | 0.351361  |
| C41 | 1.885194  | 4.119565  | 1.410255  |
| H42 | 2.375035  | 4.646053  | 0.600453  |
| C43 | 2.530175  | 3.980503  | 2.637971  |
| O44 | 3.750749  | 4.573148  | 2.787399  |
| C45 | 4.354665  | 4.743339  | 4.027544  |
| O46 | 5.365023  | 5.400963  | 4.040144  |
| C47 | 3.698463  | 4.115098  | 5.168655  |
| C48 | 2.571616  | 3.344171  | 4.986158  |
| O49 | 1.899133  | 2.680695  | 5.932073  |
| H50 | 2.325263  | 2.662044  | 6.782370  |
| C51 | 1.929078  | 3.292172  | 3.695225  |
| H52 | -0.465702 | 2.563100  | -5.310354 |
| H53 | -2.260404 | 5.509424  | -1.606451 |
| H54 | -4.158835 | 3.674191  | -1.069637 |
| H55 | -4.153345 | -1.536121 | -0.531498 |
| H56 | -2.134106 | -3.534106 | -0.571230 |
| H57 | 2.794471  | -3.617207 | -1.849749 |
| H58 | 4.736481  | -1.921846 | -2.381863 |
| H59 | 4.813222  | 3.560520  | -2.269402 |
| H60 | 2.850397  | 5.471012  | -2.467763 |
| H61 | 4.062679  | 4.448564  | 6.167347  |

Warfarin 7-10 Reactant Complex Quartet

|     |           |           |           |
|-----|-----------|-----------|-----------|
| C1  | -0.934771 | 1.788903  | -4.693198 |
| H2  | -1.623869 | 1.249332  | -5.357600 |
| H3  | -1.541163 | 2.280655  | -3.936710 |
| S4  | 0.142418  | 0.536720  | -3.936331 |
| O5  | 0.572106  | 0.974702  | 0.092026  |
| Fe6 | 0.326914  | 0.934180  | -1.525925 |
| N7  | -1.107928 | 2.370681  | -1.566504 |
| N8  | -1.098312 | -0.456733 | -1.264585 |
| N9  | 1.732410  | -0.481511 | -1.800607 |
| N10 | 1.711542  | 2.350535  | -2.002701 |
| C11 | -0.928983 | 3.712094  | -1.761613 |
| C12 | -2.158841 | 4.426577  | -1.561793 |
| C13 | -3.105641 | 3.493702  | -1.265998 |
| C14 | -2.439901 | 2.212439  | -1.274905 |
| C15 | -2.417646 | -0.244056 | -1.014041 |
| C16 | -3.083729 | -1.494600 | -0.719050 |
| C17 | -2.130414 | -2.468374 | -0.775658 |
| C18 | -0.899256 | -1.795286 | -1.142213 |
| C19 | 1.519409  | -1.816979 | -1.662847 |
| C20 | 2.746134  | -2.539371 | -1.868968 |
| C21 | 3.718760  | -1.625038 | -2.136667 |
| C22 | 3.075650  | -0.319701 | -2.060760 |
| C23 | 3.060676  | 2.162012  | -2.086152 |
| C24 | 3.735509  | 3.435190  | -2.241529 |
| C25 | 2.767321  | 4.391215  | -2.304914 |
| C26 | 1.509629  | 3.704675  | -2.135748 |
| C27 | 0.282299  | 4.330603  | -2.047934 |

|     |           |           |           |
|-----|-----------|-----------|-----------|
| H28 | 0.264994  | 5.409492  | -2.134979 |
| C29 | -3.052785 | 0.992632  | -1.025926 |
| H30 | -4.114747 | 1.009303  | -0.816259 |
| C31 | 0.317076  | -2.433684 | -1.342911 |
| H32 | 0.360243  | -3.506190 | -1.207242 |
| C33 | 3.694832  | 0.921315  | -2.112642 |
| H34 | 4.774015  | 0.953934  | -2.148372 |
| C35 | 0.660088  | 2.709899  | 3.512750  |
| H36 | 0.220377  | 2.150651  | 4.328285  |
| C37 | -0.007419 | 2.891225  | 2.319539  |
| H38 | -0.990496 | 2.464928  | 2.163329  |
| C39 | 0.605639  | 3.610907  | 1.284125  |
| H40 | 0.074711  | 3.734013  | 0.357645  |
| C41 | 1.888181  | 4.117973  | 1.416051  |
| H42 | 2.379096  | 4.640134  | 0.602526  |
| C43 | 2.532553  | 3.980418  | 2.643222  |
| O44 | 3.755548  | 4.569999  | 2.792256  |
| C45 | 4.359664  | 4.740839  | 4.032979  |
| O46 | 5.369939  | 5.398455  | 4.044960  |
| C47 | 3.702959  | 4.113841  | 5.173967  |
| C48 | 2.572982  | 3.345793  | 4.992616  |
| O49 | 1.899148  | 2.685238  | 5.938735  |
| H50 | 2.325329  | 2.663879  | 6.786747  |
| C51 | 1.930062  | 3.295040  | 3.700045  |
| H52 | -0.459792 | 2.569548  | -5.310256 |
| H53 | -2.258481 | 5.505293  | -1.604836 |
| H54 | -4.157844 | 3.671430  | -1.067488 |
| H55 | -4.149782 | -1.538121 | -0.528689 |
| H56 | -2.132896 | -3.538484 | -0.564943 |
| H57 | 2.797094  | -3.618580 | -1.850221 |
| H58 | 4.740025  | -1.922117 | -2.383255 |
| H59 | 4.814735  | 3.559977  | -2.268165 |
| H60 | 2.849933  | 5.467385  | -2.467858 |
| H61 | 4.066546  | 4.448491  | 6.173055  |

Warfarin 7-10 Transition State Doublet

|     |           |           |           |
|-----|-----------|-----------|-----------|
| C1  | -0.922706 | 1.756310  | -4.615943 |
| H2  | -1.592944 | 1.177889  | -5.265557 |
| H3  | -1.547210 | 2.259819  | -3.881258 |
| S4  | 0.173887  | 0.547072  | -3.795515 |
| O5  | 0.780084  | 1.287071  | 0.265518  |
| Fe6 | 0.368102  | 1.082477  | -1.450944 |
| N7  | -1.071657 | 2.471112  | -1.498358 |
| N8  | -1.030935 | -0.344938 | -1.080310 |
| N9  | 1.789404  | -0.376827 | -1.633902 |
| N10 | 1.724599  | 2.464479  | -1.968353 |
| C11 | -0.908933 | 3.820593  | -1.719023 |
| C12 | -2.154318 | 4.510015  | -1.543304 |
| C13 | -3.090216 | 3.564855  | -1.253453 |
| C14 | -2.402309 | 2.298262  | -1.224404 |
| C15 | -2.370204 | -0.151426 | -0.887734 |
| C16 | -3.040257 | -1.415595 | -0.651117 |
| C17 | -2.080682 | -2.380593 | -0.705293 |
| C18 | -0.841009 | -1.687494 | -1.003570 |
| C19 | 1.574540  | -1.717110 | -1.514574 |
| C20 | 2.786846  | -2.447277 | -1.777126 |
| C21 | 3.751473  | -1.536387 | -2.069897 |
| C22 | 3.113007  | -0.226660 | -1.958271 |
| C23 | 3.076525  | 2.258060  | -2.059469 |

|     |           |           |           |
|-----|-----------|-----------|-----------|
| C24 | 3.753959  | 3.522414  | -2.233719 |
| C25 | 2.790919  | 4.485837  | -2.289906 |
| C26 | 1.530508  | 3.810647  | -2.108998 |
| C27 | 0.296133  | 4.440748  | -2.008129 |
| H28 | 0.274972  | 5.517533  | -2.109336 |
| C29 | -3.010302 | 1.073945  | -0.948074 |
| H30 | -4.079966 | 1.085485  | -0.783039 |
| C31 | 0.373194  | -2.331024 | -1.210141 |
| H32 | 0.402393  | -3.408123 | -1.111201 |
| C33 | 3.716332  | 1.023138  | -2.069684 |
| H34 | 4.793101  | 1.065283  | -2.146981 |
| C35 | 0.541476  | 2.505294  | 3.477891  |
| H36 | 0.052859  | 2.118341  | 4.360748  |
| C37 | -0.065986 | 2.474323  | 2.257297  |
| H38 | -1.071138 | 2.091494  | 2.140233  |
| C39 | 0.632413  | 2.887065  | 1.063844  |
| H40 | 0.012065  | 3.300108  | 0.283928  |
| C41 | 1.921322  | 3.514860  | 1.230145  |
| H42 | 2.447191  | 3.921938  | 0.374451  |
| C43 | 2.467681  | 3.632445  | 2.490628  |
| O44 | 3.652786  | 4.313966  | 2.630946  |
| C45 | 4.197728  | 4.647952  | 3.871428  |
| O46 | 5.156536  | 5.376361  | 3.854375  |
| C47 | 3.559795  | 4.078643  | 5.055409  |
| C48 | 2.436028  | 3.290443  | 4.917247  |
| O49 | 1.759117  | 2.690243  | 5.907147  |
| H50 | 2.157707  | 2.762780  | 6.766149  |
| C51 | 1.822966  | 3.108320  | 3.628583  |
| H52 | -0.465640 | 2.532739  | -5.259489 |
| H53 | -2.268037 | 5.580615  | -1.600132 |
| H54 | -4.150263 | 3.715480  | -1.073755 |
| H55 | -4.114305 | -1.486674 | -0.516010 |
| H56 | -2.090196 | -3.463786 | -0.533506 |
| H57 | 2.825486  | -3.530269 | -1.807070 |
| H58 | 4.754803  | -1.848450 | -2.366982 |
| H59 | 4.834344  | 3.623822  | -2.271191 |
| H60 | 2.872249  | 5.552903  | -2.464315 |
| H61 | 3.962887  | 4.430406  | 6.047624  |

Warfarin 7-10 Transition State Quartet

|     |           |           |           |
|-----|-----------|-----------|-----------|
| C1  | -0.931861 | 1.765528  | -4.619709 |
| H2  | -1.592956 | 1.170318  | -5.260937 |
| H3  | -1.563007 | 2.271738  | -3.891332 |
| S4  | 0.184546  | 0.587805  | -3.788867 |
| O5  | 0.686651  | 1.385641  | 0.226110  |
| Fe6 | 0.390776  | 1.036898  | -1.462906 |
| N7  | -1.074188 | 2.439973  | -1.544735 |
| N8  | -1.016323 | -0.368728 | -1.096306 |
| N9  | 1.779489  | -0.384218 | -1.653623 |
| N10 | 1.751291  | 2.443986  | -1.955395 |
| C11 | -0.899045 | 3.789532  | -1.741004 |
| C12 | -2.142166 | 4.482184  | -1.556075 |
| C13 | -3.082743 | 3.537821  | -1.270142 |
| C14 | -2.402838 | 2.267286  | -1.256169 |
| C15 | -2.359875 | -0.167197 | -0.906763 |
| C16 | -3.029309 | -1.428927 | -0.662274 |
| C17 | -2.074282 | -2.397809 | -0.714288 |
| C18 | -0.829084 | -1.716602 | -1.018886 |
| C19 | 1.564240  | -1.733677 | -1.536352 |

|     |           |           |           |
|-----|-----------|-----------|-----------|
| C20 | 2.780919  | -2.449782 | -1.793902 |
| C21 | 3.745259  | -1.535281 | -2.084650 |
| C22 | 3.114858  | -0.227945 | -1.976080 |
| C23 | 3.096721  | 2.244546  | -2.051709 |
| C24 | 3.765697  | 3.513257  | -2.228362 |
| C25 | 2.796127  | 4.470165  | -2.282527 |
| C26 | 1.539234  | 3.786740  | -2.098145 |
| C27 | 0.305912  | 4.414776  | -2.011615 |
| H28 | 0.283336  | 5.491177  | -2.104732 |
| C29 | -3.008843 | 1.049097  | -0.972640 |
| H30 | -4.076080 | 1.056355  | -0.798576 |
| C31 | 0.375534  | -2.360867 | -1.229103 |
| H32 | 0.413284  | -3.436501 | -1.131061 |
| C33 | 3.733638  | 1.009102  | -2.075871 |
| H34 | 4.809498  | 1.041449  | -2.150493 |
| C35 | 0.555235  | 2.515465  | 3.488897  |
| H36 | 0.063714  | 2.127748  | 4.370114  |
| C37 | -0.062366 | 2.503941  | 2.279422  |
| H38 | -1.067961 | 2.124340  | 2.163807  |
| C39 | 0.617393  | 2.949398  | 1.076604  |
| H40 | -0.005903 | 3.395831  | 0.321124  |
| C41 | 1.916108  | 3.568115  | 1.250030  |
| H42 | 2.418219  | 4.012927  | 0.400898  |
| C43 | 2.473338  | 3.659332  | 2.504990  |
| O44 | 3.651005  | 4.345964  | 2.650077  |
| C45 | 4.208698  | 4.660078  | 3.891746  |
| O46 | 5.174113  | 5.379541  | 3.875142  |
| C47 | 3.575331  | 4.085874  | 5.073736  |
| C48 | 2.451583  | 3.289841  | 4.930589  |
| O49 | 1.780849  | 2.684159  | 5.916693  |
| H50 | 2.183962  | 2.754368  | 6.773607  |
| C51 | 1.840259  | 3.113843  | 3.643837  |
| H52 | -0.472466 | 2.537152  | -5.267755 |
| H53 | -2.257523 | 5.555644  | -1.602534 |
| H54 | -4.140910 | 3.697824  | -1.080890 |
| H55 | -4.103992 | -1.494879 | -0.520820 |
| H56 | -2.085164 | -3.477689 | -0.536482 |
| H57 | 2.827184  | -3.532764 | -1.814500 |
| H58 | 4.750153  | -1.847085 | -2.374564 |
| H59 | 4.844538  | 3.621010  | -2.269852 |
| H60 | 2.872265  | 5.539456  | -2.456504 |
| H61 | 3.974285  | 4.438624  | 6.066928  |

Diclofenac 4'-1 Reactant Complex Doublet

|     |           |           |           |
|-----|-----------|-----------|-----------|
| C1  | -1.984816 | 0.077129  | 2.971950  |
| S2  | -1.291004 | 1.191700  | 1.707387  |
| H3  | -3.028195 | 0.375748  | 3.124001  |
| H4  | -1.978108 | -0.948441 | 2.593088  |
| O5  | 1.096838  | -0.531957 | -1.204658 |
| Fe6 | 0.101145  | 0.010575  | -0.020968 |
| N7  | -0.252331 | -1.866502 | 0.682618  |
| N8  | -1.536604 | -0.126609 | -1.196050 |
| N9  | 0.304159  | 1.977864  | -0.502308 |
| N10 | 1.593428  | 0.205548  | 1.332971  |
| C11 | 0.562107  | -2.589894 | 1.516506  |
| C12 | 0.123259  | -3.961573 | 1.591764  |
| C13 | -0.969627 | -4.060505 | 0.783000  |
| C14 | -1.184856 | -2.750262 | 0.209043  |
| C15 | -2.297192 | -1.239925 | -1.413917 |

|      |           |           |           |
|------|-----------|-----------|-----------|
| C16  | -3.288577 | -0.977411 | -2.438903 |
| C17  | -3.120887 | 0.319949  | -2.826511 |
| C18  | -2.021039 | 0.833448  | -2.028787 |
| C19  | -0.468501 | 2.659370  | -1.396899 |
| C20  | -0.030690 | 4.031615  | -1.489739 |
| C21  | 1.012864  | 4.180378  | -0.626546 |
| C22  | 1.222780  | 2.876629  | -0.019738 |
| C23  | 2.376518  | 1.310986  | 1.519396  |
| C24  | 3.430073  | 1.023579  | 2.463652  |
| C25  | 3.293230  | -0.281617 | 2.824191  |
| C26  | 2.144997  | -0.785026 | 2.106095  |
| C27  | 1.677641  | -2.088497 | 2.173839  |
| H28  | 2.239503  | -2.785762 | 2.782749  |
| C29  | -2.152144 | -2.450235 | -0.747762 |
| H30  | -2.841370 | -3.243337 | -1.002097 |
| C31  | -1.534311 | 2.135301  | -2.114882 |
| H32  | -1.997689 | 2.802257  | -2.829213 |
| C33  | 2.218641  | 2.534476  | 0.884889  |
| H34  | 2.988710  | 3.259483  | 1.097394  |
| C35  | 5.012032  | -3.195252 | -3.435778 |
| C36  | 4.849699  | -2.701993 | -2.124756 |
| C37  | 3.607041  | -2.609367 | -1.510980 |
| C38  | 2.467334  | -3.003722 | -2.209541 |
| C39  | 2.583626  | -3.480156 | -3.510343 |
| C40  | 3.837930  | -3.576187 | -4.100183 |
| C141 | 6.262759  | -2.121642 | -1.263657 |
| H42  | 3.522906  | -2.191651 | -0.515461 |
| H43  | 1.494686  | -2.895246 | -1.746195 |
| H44  | 1.716781  | -3.775021 | -4.085399 |
| C145 | 3.921802  | -4.190003 | -5.752914 |
| C46  | 9.164431  | -6.078943 | -2.824944 |
| C47  | 9.555640  | -4.851935 | -3.369184 |
| C48  | 8.621944  | -3.873276 | -3.725548 |
| C49  | 7.253976  | -4.190397 | -3.590893 |
| C50  | 6.856976  | -5.413077 | -3.031124 |
| C51  | 7.808208  | -6.348203 | -2.629113 |
| H52  | 9.912285  | -6.814473 | -2.548309 |
| H53  | 10.605270 | -4.624321 | -3.510933 |
| N54  | 6.282728  | -3.250028 | -4.025925 |
| H55  | 5.798482  | -5.630319 | -2.930832 |
| H56  | 7.488257  | -7.289590 | -2.194743 |
| H57  | 6.308060  | -3.025015 | -5.007676 |
| C58  | 9.013958  | -2.476793 | -4.202068 |
| H59  | 8.255027  | -1.777582 | -3.847895 |
| H60  | 9.013512  | -2.438905 | -5.299436 |
| C61  | 10.401080 | -2.012848 | -3.732110 |
| O62  | 11.385058 | -2.626345 | -4.221299 |
| O63  | 10.459382 | -1.070244 | -2.905868 |
| H64  | -1.504115 | 0.053379  | 3.963486  |
| H65  | 0.602905  | -4.759681 | 2.161766  |
| H66  | -1.537338 | -4.964394 | 0.572324  |
| H67  | -4.011334 | -1.723326 | -2.764901 |
| H68  | -3.626759 | 0.957605  | -3.564958 |
| H69  | -0.510429 | 4.799053  | -2.093803 |
| H70  | 1.497394  | 5.149366  | -0.459623 |
| H71  | 4.172235  | 1.746710  | 2.786923  |
| H72  | 3.892051  | -0.865416 | 3.514699  |

Diclofenac 4'-1 Reactant Complex Quartet

|      |           |           |           |
|------|-----------|-----------|-----------|
| C1   | -1.957065 | 0.077094  | 2.962298  |
| S2   | -1.248478 | 1.186934  | 1.702396  |
| H3   | -2.999917 | 0.383961  | 3.105628  |
| H4   | -1.954512 | -0.947696 | 2.582435  |
| O5   | 1.116557  | -0.557449 | -1.235987 |
| Fe6  | 0.141915  | -0.002606 | -0.046834 |
| N7   | -0.221453 | -1.872701 | 0.662379  |
| N8   | -1.514362 | -0.134053 | -1.205994 |
| N9   | 0.333753  | 1.968212  | -0.518364 |
| N10  | 1.626264  | 0.198001  | 1.306608  |
| C11  | 0.589280  | -2.595568 | 1.499910  |
| C12  | 0.136042  | -3.960584 | 1.592398  |
| C13  | -0.961826 | -4.057271 | 0.790116  |
| C14  | -1.165138 | -2.752138 | 0.202028  |
| C15  | -2.278989 | -1.244256 | -1.418334 |
| C16  | -3.276269 | -0.981319 | -2.437691 |
| C17  | -3.106186 | 0.315902  | -2.827833 |
| C18  | -2.001377 | 0.825786  | -2.036111 |
| C19  | -0.447292 | 2.648559  | -1.407776 |
| C20  | -0.020023 | 4.021807  | -1.497597 |
| C21  | 1.024341  | 4.176162  | -0.636506 |
| C22  | 1.245746  | 2.871165  | -0.034551 |
| C23  | 2.404986  | 1.307503  | 1.499903  |
| C24  | 3.449452  | 1.020905  | 2.454444  |
| C25  | 3.309194  | -0.284759 | 2.816912  |
| C26  | 2.171134  | -0.790578 | 2.086285  |
| C27  | 1.706194  | -2.094420 | 2.155471  |
| H28  | 2.265082  | -2.788363 | 2.771124  |
| C29  | -2.136223 | -2.452904 | -0.750728 |
| H30  | -2.830790 | -3.243356 | -1.000455 |
| C31  | -1.514220 | 2.127400  | -2.123517 |
| H32  | -1.975725 | 2.794769  | -2.838019 |
| C33  | 2.246396  | 2.532279  | 0.869180  |
| H34  | 3.014058  | 3.259547  | 1.081323  |
| C35  | 4.984922  | -3.105141 | -3.362135 |
| C36  | 4.817083  | -2.607405 | -2.053373 |
| C37  | 3.570251  | -2.483644 | -1.451833 |
| C38  | 2.428051  | -2.858877 | -2.155830 |
| C39  | 2.553549  | -3.358421 | -3.449138 |
| C40  | 3.810158  | -3.472165 | -4.032467 |
| C141 | 6.236520  | -2.060077 | -1.182853 |
| H42  | 3.484643  | -2.057209 | -0.460127 |
| H43  | 1.453281  | -2.747680 | -1.701937 |
| H44  | 1.690082  | -3.658561 | -4.024690 |
| C145 | 3.900444  | -4.087864 | -5.685867 |
| C46  | 9.113397  | -6.055425 | -2.813646 |
| C47  | 9.514930  | -4.829010 | -3.351383 |
| C48  | 8.590786  | -3.836875 | -3.694272 |
| C49  | 7.219278  | -4.127835 | -3.531789 |
| C50  | 6.813831  | -5.350319 | -2.976963 |
| C51  | 7.755556  | -6.306753 | -2.605781 |
| H52  | 9.853860  | -6.805721 | -2.560103 |
| H53  | 10.565643 | -4.615961 | -3.504467 |
| N54  | 6.257740  | -3.169683 | -3.950108 |
| H55  | 5.753487  | -5.552851 | -2.859530 |
| H56  | 7.427270  | -7.253013 | -2.188128 |
| H57  | 6.276789  | -2.953640 | -4.934529 |
| C58  | 9.009551  | -2.464713 | -4.215659 |
| H59  | 8.257030  | -1.738052 | -3.906772 |
| H60  | 9.030890  | -2.479941 | -5.313202 |

|     |           |           |           |
|-----|-----------|-----------|-----------|
| C61 | 10.397453 | -2.007516 | -3.737847 |
| O62 | 11.381043 | -2.626754 | -4.223457 |
| O63 | 10.457365 | -1.068894 | -2.908763 |
| H64 | -1.486518 | 0.051722  | 3.958752  |
| H65 | 0.613549  | -4.755877 | 2.166197  |
| H66 | -1.539299 | -4.957072 | 0.584479  |
| H67 | -4.002326 | -1.726332 | -2.760288 |
| H68 | -3.610446 | 0.954219  | -3.565251 |
| H69 | -0.509860 | 4.785984  | -2.098204 |
| H70 | 1.500622  | 5.146662  | -0.469388 |
| H71 | 4.188749  | 1.743360  | 2.781766  |
| H72 | 3.899925  | -0.869445 | 3.514021  |

Diclofenac 4'-1 Transition State Doublet

|      |           |           |           |
|------|-----------|-----------|-----------|
| C1   | -1.829916 | 0.042108  | 2.878601  |
| S2   | -1.112434 | 1.140487  | 1.600813  |
| H3   | -2.880373 | 0.330996  | 2.994478  |
| H4   | -1.801794 | -0.989536 | 2.517864  |
| O5   | 1.343950  | -0.594358 | -1.328778 |
| Fe6  | 0.281209  | -0.072607 | -0.068984 |
| N7   | -0.093508 | -1.910645 | 0.637998  |
| N8   | -1.374202 | -0.202577 | -1.257704 |
| N9   | 0.485195  | 1.903473  | -0.600040 |
| N10  | 1.756804  | 0.138649  | 1.266323  |
| C11  | 0.690584  | -2.626966 | 1.516908  |
| C12  | 0.216027  | -3.980814 | 1.623460  |
| C13  | -0.882981 | -4.073996 | 0.821299  |
| C14  | -1.062327 | -2.783756 | 0.200051  |
| C15  | -2.167538 | -1.298056 | -1.439720 |
| C16  | -3.193716 | -1.021761 | -2.430559 |
| C17  | -3.017417 | 0.271643  | -2.828111 |
| C18  | -1.880388 | 0.765601  | -2.071745 |
| C19  | -0.326063 | 2.581880  | -1.459972 |
| C20  | 0.053744  | 3.969571  | -1.523818 |
| C21  | 1.104497  | 4.138816  | -0.673176 |
| C22  | 1.367819  | 2.823833  | -0.095542 |
| C23  | 2.518879  | 1.261130  | 1.455815  |
| C24  | 3.551829  | 0.991567  | 2.428383  |
| C25  | 3.407161  | -0.307680 | 2.813929  |
| C26  | 2.277051  | -0.826684 | 2.083207  |
| C27  | 1.802622  | -2.128230 | 2.176156  |
| H28  | 2.345476  | -2.815609 | 2.811606  |
| C29  | -2.032966 | -2.497009 | -0.756047 |
| H30  | -2.740835 | -3.281718 | -0.983885 |
| C31  | -1.403544 | 2.064448  | -2.159401 |
| H32  | -1.889938 | 2.741137  | -2.845065 |
| C33  | 2.349268  | 2.491851  | 0.833434  |
| H34  | 3.092881  | 3.230526  | 1.084701  |
| C35  | 4.744503  | -2.533608 | -2.942196 |
| C36  | 4.753055  | -2.141612 | -1.579048 |
| C37  | 3.608910  | -2.001514 | -0.822043 |
| C38  | 2.325739  | -2.236578 | -1.397537 |
| C39  | 2.309055  | -2.670071 | -2.751804 |
| C40  | 3.463742  | -2.766836 | -3.495577 |
| C141 | 6.301280  | -1.768347 | -0.864677 |
| H42  | 3.687736  | -1.691860 | 0.210230  |
| H43  | 1.531014  | -2.591114 | -0.755502 |
| H44  | 1.374304  | -2.970842 | -3.196276 |
| C145 | 3.364817  | -3.315538 | -5.172495 |

|     |           |           |           |
|-----|-----------|-----------|-----------|
| C46 | 8.643990  | -5.783096 | -2.770155 |
| C47 | 9.106395  | -4.593221 | -3.333618 |
| C48 | 8.252433  | -3.517918 | -3.608657 |
| C49 | 6.877964  | -3.689734 | -3.337663 |
| C50 | 6.412168  | -4.886464 | -2.771624 |
| C51 | 7.286878  | -5.925924 | -2.474052 |
| H52 | 9.338097  | -6.592408 | -2.566877 |
| H53 | 10.158844 | -4.463545 | -3.555762 |
| N54 | 5.928192  | -2.671975 | -3.664930 |
| H55 | 5.349348  | -4.999332 | -2.587093 |
| H56 | 6.902459  | -6.845060 | -2.044935 |
| H57 | 5.858524  | -2.451684 | -4.648005 |
| C58 | 8.791428  | -2.208239 | -4.176754 |
| H59 | 8.107940  | -1.401327 | -3.910015 |
| H60 | 8.829032  | -2.275237 | -5.271432 |
| C61 | 10.218909 | -1.864743 | -3.691498 |
| O62 | 11.157535 | -2.561247 | -4.165286 |
| O63 | 10.343368 | -0.928960 | -2.866007 |
| H64 | -1.385436 | 0.032753  | 3.892592  |
| H65 | 0.699234  | -4.769897 | 2.196204  |
| H66 | -1.505722 | -4.949662 | 0.652323  |
| H67 | -3.944930 | -1.755600 | -2.717583 |
| H68 | -3.530560 | 0.923430  | -3.553247 |
| H69 | -0.489554 | 4.719943  | -2.098932 |
| H70 | 1.539455  | 5.129058  | -0.510313 |
| H71 | 4.282346  | 1.723823  | 2.755950  |
| H72 | 3.976529  | -0.888362 | 3.528738  |

Diclofenac 4'-1 Transition State Quartet

|     |           |           |           |
|-----|-----------|-----------|-----------|
| C1  | -1.840721 | 0.038490  | 2.896794  |
| S2  | -1.102161 | 1.122145  | 1.623832  |
| H3  | -2.888668 | 0.338807  | 3.007243  |
| H4  | -1.821657 | -0.993923 | 2.536115  |
| O5  | 1.325515  | -0.748034 | -1.299530 |
| Fe6 | 0.287724  | -0.056544 | -0.132693 |
| N7  | -0.128055 | -1.898364 | 0.630913  |
| N8  | -1.374818 | -0.189434 | -1.290047 |
| N9  | 0.479098  | 1.898737  | -0.626910 |
| N10 | 1.757478  | 0.154411  | 1.228851  |
| C11 | 0.669019  | -2.612214 | 1.491595  |
| C12 | 0.197338  | -3.967424 | 1.603975  |
| C13 | -0.905432 | -4.062906 | 0.805887  |
| C14 | -1.088298 | -2.770657 | 0.187543  |
| C15 | -2.175085 | -1.287496 | -1.462485 |
| C16 | -3.202870 | -1.009128 | -2.449924 |
| C17 | -3.030692 | 0.283362  | -2.846534 |
| C18 | -1.890703 | 0.780608  | -2.096948 |
| C19 | -0.341018 | 2.588509  | -1.482573 |
| C20 | 0.043406  | 3.975016  | -1.534020 |
| C21 | 1.093251  | 4.139394  | -0.682377 |
| C22 | 1.361206  | 2.826076  | -0.110374 |
| C23 | 2.515165  | 1.271594  | 1.433932  |
| C24 | 3.535427  | 0.999273  | 2.419852  |
| C25 | 3.385860  | -0.300008 | 2.797953  |
| C26 | 2.265780  | -0.817285 | 2.049914  |
| C27 | 1.784372  | -2.113159 | 2.147570  |
| H28 | 2.323446  | -2.798577 | 2.788590  |
| C29 | -2.055573 | -2.480631 | -0.771165 |
| H30 | -2.773542 | -3.258046 | -0.994660 |



|      |           |           |           |
|------|-----------|-----------|-----------|
| C31  | -1.418449 | 2.080574  | -2.177502 |
| H32  | -1.912943 | 2.763971  | -2.853204 |
| C33  | 2.341861  | 2.503129  | 0.814720  |
| H34  | 3.076294  | 3.249668  | 1.070618  |
| C35  | 4.789073  | -2.608873 | -2.975050 |
| C36  | 4.738272  | -2.258780 | -1.602088 |
| C37  | 3.569103  | -2.175081 | -0.875229 |
| C38  | 2.306242  | -2.391496 | -1.497101 |
| C39  | 2.348254  | -2.780306 | -2.867565 |
| C40  | 3.532810  | -2.838978 | -3.574479 |
| C141 | 6.252976  | -1.879300 | -0.825021 |
| H42  | 3.612225  | -1.925469 | 0.175844  |
| H43  | 1.485080  | -2.758301 | -0.904110 |
| H44  | 1.445446  | -3.101716 | -3.359581 |
| C145 | 3.495260  | -3.337716 | -5.268937 |
| C46  | 8.734632  | -5.822305 | -2.775333 |
| C47  | 9.188974  | -4.629864 | -3.346373 |
| C48  | 8.327934  | -3.562397 | -3.622957 |
| C49  | 6.952392  | -3.734697 | -3.349272 |
| C50  | 6.495392  | -4.937485 | -2.780737 |
| C51  | 7.378653  | -5.968545 | -2.480241 |
| H52  | 9.433824  | -6.625465 | -2.566999 |
| H53  | 10.240673 | -4.496886 | -3.568518 |
| N54  | 6.006635  | -2.716722 | -3.656045 |
| H55  | 5.434579  | -5.056732 | -2.596957 |
| H56  | 6.998774  | -6.887742 | -2.044858 |
| H57  | 6.010541  | -2.378962 | -4.605732 |
| C58  | 8.858336  | -2.249297 | -4.194370 |
| H59  | 8.172416  | -1.446202 | -3.922067 |
| H60  | 8.893315  | -2.314039 | -5.289244 |
| C61  | 10.282403 | -1.891935 | -3.708967 |
| O62  | 11.230340 | -2.571805 | -4.179246 |
| O63  | 10.389824 | -0.954023 | -2.880502 |
| H64  | -1.397733 | 0.029541  | 3.912163  |
| H65  | 0.681435  | -4.756242 | 2.177692  |
| H66  | -1.519901 | -4.944308 | 0.632259  |
| H67  | -3.949504 | -1.747561 | -2.741032 |
| H68  | -3.544221 | 0.935261  | -3.571293 |
| H69  | -0.489405 | 4.733299  | -2.112190 |
| H70  | 1.533051  | 5.130432  | -0.517777 |
| H71  | 4.263396  | 1.729171  | 2.756621  |
| H72  | 3.954091  | -0.882794 | 3.513958  |

Diclofenac 4'-2 Reactant Complex Doublet

|     |           |           |           |
|-----|-----------|-----------|-----------|
| C1  | -1.930812 | 0.114312  | 3.121564  |
| S2  | -1.328084 | 1.231170  | 1.814260  |
| H3  | -2.957591 | 0.422689  | 3.354038  |
| H4  | -1.961112 | -0.907994 | 2.736508  |
| O5  | 1.106966  | -0.432917 | -1.073304 |
| Fe6 | 0.092240  | 0.042189  | 0.121655  |
| N7  | -0.215370 | -1.839177 | 0.835610  |
| N8  | -1.528544 | -0.165922 | -1.073537 |
| N9  | 0.260120  | 1.992576  | -0.397159 |
| N10 | 1.571167  | 0.280011  | 1.474778  |
| C11 | 0.610272  | -2.545762 | 1.672211  |
| C12 | 0.222052  | -3.935531 | 1.729726  |
| C13 | -0.873882 | -4.054240 | 0.926652  |
| C14 | -1.123525 | -2.748290 | 0.365075  |
| C15 | -2.256082 | -1.299156 | -1.285795 |

|      |           |           |           |
|------|-----------|-----------|-----------|
| C16  | -3.209890 | -1.098605 | -2.355600 |
| C17  | -3.047440 | 0.185003  | -2.786007 |
| C18  | -1.999851 | 0.751720  | -1.959414 |
| C19  | -0.516724 | 2.625808  | -1.317636 |
| C20  | -0.107632 | 3.997923  | -1.456310 |
| C21  | 0.943183  | 4.195283  | -0.612039 |
| C22  | 1.175755  | 2.915197  | 0.048764  |
| C23  | 2.364346  | 1.385465  | 1.615801  |
| C24  | 3.428897  | 1.113795  | 2.560595  |
| C25  | 3.258804  | -0.166405 | 2.993556  |
| C26  | 2.113121  | -0.684324 | 2.287010  |
| C27  | 1.683560  | -2.000473 | 2.360451  |
| H28  | 2.255105  | -2.674892 | 2.986072  |
| C29  | -2.090993 | -2.492315 | -0.596274 |
| H30  | -2.747449 | -3.311688 | -0.848406 |
| C31  | -1.546779 | 2.061286  | -2.058144 |
| H32  | -2.011158 | 2.703606  | -2.793638 |
| C33  | 2.184789  | 2.598620  | 0.954637  |
| H34  | 2.946577  | 3.336046  | 1.153833  |
| C35  | 4.601801  | -2.707257 | -2.966656 |
| C36  | 4.469947  | -2.501125 | -1.580112 |
| C37  | 3.274981  | -2.681674 | -0.901930 |
| C38  | 2.144565  | -3.081376 | -1.606679 |
| C39  | 2.216954  | -3.262802 | -2.982922 |
| C40  | 3.428927  | -3.082586 | -3.641611 |
| C141 | 5.864734  | -1.958990 | -0.668987 |
| H42  | 3.224477  | -2.483551 | 0.161483  |
| H43  | 1.205215  | -3.210213 | -1.083325 |
| H44  | 1.341870  | -3.568221 | -3.544490 |
| C145 | 3.490608  | -3.359050 | -5.388183 |
| C46  | 8.813023  | -5.413699 | -2.722299 |
| C47  | 9.146286  | -4.060587 | -2.769233 |
| C48  | 8.189824  | -3.080850 | -3.053846 |
| C49  | 6.872376  | -3.497720 | -3.307311 |
| C50  | 6.536659  | -4.856022 | -3.260719 |
| C51  | 7.498239  | -5.817698 | -2.965714 |
| H52  | 9.573042  | -6.154224 | -2.500301 |
| H53  | 10.163013 | -3.737032 | -2.576510 |
| N54  | 5.844201  | -2.530810 | -3.598237 |
| H55  | 5.509941  | -5.145991 | -3.459706 |
| H56  | 7.227935  | -6.867050 | -2.944691 |
| H57  | 5.765482  | -2.304818 | -4.577811 |
| C58  | 8.550926  | -1.601436 | -3.017411 |
| H59  | 8.499005  | -1.265077 | -1.977279 |
| H60  | 7.808725  | -1.042269 | -3.581772 |
| C61  | 9.952626  | -1.306708 | -3.553463 |
| O62  | 10.069152 | -0.947953 | -4.746184 |
| O63  | 10.914991 | -1.469051 | -2.744794 |
| H64  | -1.397859 | 0.066782  | 4.081426  |
| H65  | 0.748796  | -4.726719 | 2.270656  |
| H66  | -1.462149 | -4.938506 | 0.693361  |
| H67  | -3.895941 | -1.878456 | -2.683663 |
| H68  | -3.502581 | 0.766357  | -3.592712 |
| H69  | -0.626397 | 4.706474  | -2.098941 |
| H70  | 1.417676  | 5.175148  | -0.506488 |
| H71  | 4.225774  | 1.806784  | 2.807630  |
| H72  | 3.824760  | -0.750559 | 3.717227  |

Diclofenac 4'-2 Reactant Complex Quartet

|      |           |           |           |
|------|-----------|-----------|-----------|
| C1   | -1.957547 | 0.130544  | 3.120208  |
| S2   | -1.267331 | 1.213386  | 1.820993  |
| H3   | -2.985249 | 0.472422  | 3.291356  |
| H4   | -1.998439 | -0.896135 | 2.747363  |
| O5   | 1.083874  | -0.564750 | -1.148077 |
| Fe6  | 0.105500  | -0.000225 | 0.032450  |
| N7   | -0.249978 | -1.864650 | 0.760125  |
| N8   | -1.541693 | -0.148236 | -1.138089 |
| N9   | 0.287973  | 1.965414  | -0.469439 |
| N10  | 1.578126  | 0.213701  | 1.388440  |
| C11  | 0.570305  | -2.590993 | 1.585750  |
| C12  | 0.154292  | -3.972549 | 1.633877  |
| C13  | -0.935781 | -4.070622 | 0.821820  |
| C14  | -1.167246 | -2.755524 | 0.273582  |
| C15  | -2.289079 | -1.270617 | -1.355926 |
| C16  | -3.256719 | -1.035193 | -2.405045 |
| C17  | -3.081199 | 0.250913  | -2.818636 |
| C18  | -2.010400 | 0.791440  | -2.005104 |
| C19  | -0.487022 | 2.632877  | -1.376205 |
| C20  | -0.072109 | 4.011075  | -1.467638 |
| C21  | 0.963574  | 4.178743  | -0.594267 |
| C22  | 1.189265  | 2.878513  | 0.017959  |
| C23  | 2.358664  | 1.325098  | 1.564320  |
| C24  | 3.410678  | 1.044824  | 2.514941  |
| C25  | 3.261130  | -0.250432 | 2.904037  |
| C26  | 2.120866  | -0.764983 | 2.184078  |
| C27  | 1.670485  | -2.074187 | 2.256875  |
| H28  | 2.236308  | -2.760759 | 2.873361  |
| C29  | -2.131132 | -2.474948 | -0.686420 |
| H30  | -2.791433 | -3.286001 | -0.950383 |
| C31  | -1.533676 | 2.093549  | -2.107278 |
| H32  | -2.001359 | 2.745131  | -2.834212 |
| C33  | 2.187665  | 2.546691  | 0.929996  |
| H34  | 2.943090  | 3.284457  | 1.151113  |
| C35  | 4.790313  | -2.845264 | -3.026793 |
| C36  | 4.600156  | -2.550303 | -1.662945 |
| C37  | 3.357411  | -2.579392 | -1.045104 |
| C38  | 2.231854  | -2.931809 | -1.782878 |
| C39  | 2.374845  | -3.268842 | -3.124961 |
| C40  | 3.630122  | -3.214594 | -3.726954 |
| C141 | 5.986978  | -2.063429 | -0.709236 |
| H42  | 3.268482  | -2.294870 | -0.004224 |
| H43  | 1.258686  | -2.961439 | -1.311020 |
| H44  | 1.523231  | -3.585070 | -3.712662 |
| C145 | 3.746289  | -3.625554 | -5.443533 |
| C46  | 9.161701  | -5.444938 | -2.824422 |
| C47  | 9.410774  | -4.073614 | -2.786715 |
| C48  | 8.399270  | -3.137894 | -3.024142 |
| C49  | 7.110826  | -3.616286 | -3.319769 |
| C50  | 6.856744  | -4.993840 | -3.344751 |
| C51  | 7.872534  | -5.910786 | -3.096873 |
| H52  | 9.967182  | -6.150221 | -2.654427 |
| H53  | 10.407871 | -3.701332 | -2.579508 |
| N54  | 6.047906  | -2.695013 | -3.638257 |
| H55  | 5.852164  | -5.332473 | -3.578546 |
| H56  | 7.669504  | -6.975102 | -3.140778 |
| H57  | 5.976027  | -2.517455 | -4.626732 |
| C58  | 8.696738  | -1.647221 | -2.914624 |
| H59  | 8.726457  | -1.380434 | -1.853952 |
| H60  | 7.886977  | -1.087780 | -3.379023 |

|     |           |           |           |
|-----|-----------|-----------|-----------|
| C61 | 10.043360 | -1.287197 | -3.547796 |
| O62 | 10.079386 | -0.981042 | -4.756684 |
| O63 | 11.059619 | -1.363563 | -2.788045 |
| H64 | -1.470668 | 0.084451  | 4.111043  |
| H65 | 0.662419  | -4.775240 | 2.170845  |
| H66 | -1.518719 | -4.954679 | 0.571218  |
| H67 | -3.978967 | -1.775086 | -2.744004 |
| H68 | -3.553108 | 0.837947  | -3.612674 |
| H69 | -0.554708 | 4.763607  | -2.091878 |
| H70 | 1.426227  | 5.156709  | -0.434501 |
| H71 | 4.171757  | 1.760676  | 2.806573  |
| H72 | 3.840233  | -0.830933 | 3.614084  |

Diclofenac 4'-2 Transition State Doublet

|      |           |           |           |
|------|-----------|-----------|-----------|
| C1   | -1.849302 | 0.081345  | 3.014957  |
| S2   | -1.169546 | 1.159529  | 1.695545  |
| H3   | -2.885013 | 0.398981  | 3.177051  |
| H4   | -1.862033 | -0.950251 | 2.654966  |
| O5   | 1.231184  | -0.570439 | -1.218788 |
| Fe6  | 0.188045  | -0.072753 | 0.085776  |
| N7   | -0.152600 | -1.912464 | 0.799715  |
| N8   | -1.439570 | -0.244910 | -1.136621 |
| N9   | 0.403818  | 1.880788  | -0.513789 |
| N10  | 1.681983  | 0.146976  | 1.393611  |
| C11  | 0.645873  | -2.627015 | 1.670344  |
| C12  | 0.227999  | -4.005910 | 1.719878  |
| C13  | -0.862348 | -4.110219 | 0.905763  |
| C14  | -1.088770 | -2.807584 | 0.330898  |
| C15  | -2.199276 | -1.358683 | -1.330426 |
| C16  | -3.174374 | -1.133091 | -2.379214 |
| C17  | -2.997144 | 0.149271  | -2.807494 |
| C18  | -1.912080 | 0.689486  | -2.011672 |
| C19  | -0.397239 | 2.530754  | -1.404913 |
| C20  | -0.027052 | 3.920121  | -1.488680 |
| C21  | 1.014211  | 4.113893  | -0.631071 |
| C22  | 1.281605  | 2.811558  | -0.022237 |
| C23  | 2.446141  | 1.273308  | 1.550818  |
| C24  | 3.481228  | 1.023743  | 2.528933  |
| C25  | 3.315616  | -0.255228 | 2.970054  |
| C26  | 2.187724  | -0.792347 | 2.249104  |
| C27  | 1.728590  | -2.101588 | 2.354917  |
| H28  | 2.271425  | -2.772715 | 3.007312  |
| C29  | -2.049237 | -2.550135 | -0.633163 |
| H30  | -2.722028 | -3.359796 | -0.872328 |
| C31  | -1.442948 | 1.985957  | -2.127434 |
| H32  | -1.913301 | 2.634614  | -2.852618 |
| C33  | 2.266101  | 2.494342  | 0.910432  |
| H34  | 3.006655  | 3.240531  | 1.152178  |
| C35  | 4.515987  | -2.559400 | -2.773338 |
| C36  | 4.499529  | -2.214252 | -1.395501 |
| C37  | 3.344216  | -2.062992 | -0.667268 |
| C38  | 2.071017  | -2.271550 | -1.275604 |
| C39  | 2.067650  | -2.713821 | -2.633258 |
| C40  | 3.235454  | -2.806851 | -3.348764 |
| C141 | 6.018642  | -1.879269 | -0.607465 |
| H42  | 3.401971  | -1.756245 | 0.365442  |
| H43  | 1.256346  | -2.610665 | -0.650472 |
| H44  | 1.132744  | -3.021714 | -3.080505 |
| C145 | 3.180026  | -3.357758 | -5.028744 |

|     |           |           |           |
|-----|-----------|-----------|-----------|
| C46 | 8.758896  | -5.393111 | -2.715870 |
| C47 | 9.068969  | -4.035060 | -2.759237 |
| C48 | 8.091945  | -3.060954 | -2.999476 |
| C49 | 6.768450  | -3.502203 | -3.182565 |
| C50 | 6.453141  | -4.864435 | -3.126879 |
| C51 | 7.441710  | -5.816659 | -2.898764 |
| H52 | 9.544647  | -6.121906 | -2.548074 |
| H53 | 10.088676 | -3.701817 | -2.609215 |
| N54 | 5.684635  | -2.595081 | -3.513045 |
| H55 | 5.423244  | -5.164111 | -3.292421 |
| H56 | 7.190884  | -6.870979 | -2.886205 |
| H57 | 5.523098  | -2.540965 | -4.511397 |
| C58 | 8.458230  | -1.583731 | -3.006612 |
| H59 | 8.398807  | -1.213368 | -1.978796 |
| H60 | 7.715531  | -1.043416 | -3.590408 |
| C61 | 9.873452  | -1.296107 | -3.534121 |
| O62 | 10.001011 | -0.914436 | -4.718005 |
| O63 | 10.829294 | -1.484327 | -2.723521 |
| H64 | -1.370822 | 0.053165  | 4.014351  |
| H65 | 0.745151  | -4.799036 | 2.258123  |
| H66 | -1.468418 | -4.981368 | 0.665478  |
| H67 | -3.898440 | -1.879789 | -2.696081 |
| H68 | -3.468431 | 0.748440  | -3.596447 |
| H69 | -0.569106 | 4.651394  | -2.090472 |
| H70 | 1.441256  | 5.109783  | -0.486405 |
| H71 | 4.237731  | 1.750280  | 2.805205  |
| H72 | 3.870418  | -0.819202 | 3.710446  |

Diclofenac 4'-2 Transition State Quartet

|     |           |           |           |
|-----|-----------|-----------|-----------|
| C1  | -1.878170 | 0.102875  | 3.066524  |
| S2  | -1.170688 | 1.165364  | 1.755365  |
| H3  | -2.910092 | 0.439677  | 3.215342  |
| H4  | -1.905901 | -0.928629 | 2.704507  |
| O5  | 1.217065  | -0.773036 | -1.178107 |
| Fe6 | 0.200222  | -0.051758 | -0.011923 |
| N7  | -0.204154 | -1.885179 | 0.779316  |
| N8  | -1.444356 | -0.210862 | -1.184173 |
| N9  | 0.389478  | 1.890417  | -0.543602 |
| N10 | 1.665920  | 0.180249  | 1.348651  |
| C11 | 0.609519  | -2.600011 | 1.623379  |
| C12 | 0.194997  | -3.979533 | 1.677450  |
| C13 | -0.897419 | -4.084319 | 0.865045  |
| C14 | -1.122840 | -2.778571 | 0.297827  |
| C15 | -2.215465 | -1.326896 | -1.369489 |
| C16 | -3.198843 | -1.092141 | -2.406839 |
| C17 | -3.020586 | 0.190669  | -2.833855 |
| C18 | -1.928231 | 0.727077  | -2.047321 |
| C19 | -0.418563 | 2.560652  | -1.426727 |
| C20 | -0.047916 | 3.949031  | -1.489962 |
| C21 | 0.991881  | 4.133168  | -0.627433 |
| C22 | 1.264091  | 2.829812  | -0.034592 |
| C23 | 2.431279  | 1.296542  | 1.525532  |
| C24 | 3.455950  | 1.038718  | 2.512784  |
| C25 | 3.287004  | -0.245796 | 2.934859  |
| C26 | 2.165273  | -0.774565 | 2.197053  |
| C27 | 1.700378  | -2.076034 | 2.302415  |
| H28 | 2.245345  | -2.750199 | 2.949547  |
| C29 | -2.079037 | -2.514768 | -0.674215 |
| H30 | -2.754562 | -3.319758 | -0.916127 |

|      |           |           |           |
|------|-----------|-----------|-----------|
| C31  | -1.463963 | 2.026808  | -2.153585 |
| H32  | -1.941622 | 2.683894  | -2.865407 |
| C33  | 2.253756  | 2.519724  | 0.888736  |
| H34  | 2.988894  | 3.270756  | 1.128182  |
| C35  | 4.588861  | -2.630768 | -2.837749 |
| C36  | 4.508629  | -2.332411 | -1.454111 |
| C37  | 3.331003  | -2.270421 | -0.746874 |
| C38  | 2.080698  | -2.475966 | -1.394734 |
| C39  | 2.144656  | -2.879221 | -2.759574 |
| C40  | 3.340878  | -2.909525 | -3.447029 |
| C141 | 5.997545  | -1.987379 | -0.609540 |
| H42  | 3.351112  | -2.031817 | 0.305264  |
| H43  | 1.243329  | -2.834673 | -0.820319 |
| H44  | 1.244765  | -3.226521 | -3.250352 |
| C145 | 3.341840  | -3.433694 | -5.139429 |
| C46  | 8.856687  | -5.425471 | -2.778260 |
| C47  | 9.163799  | -4.065832 | -2.789437 |
| C48  | 8.187225  | -3.090973 | -3.025924 |
| C49  | 6.865608  | -3.523453 | -3.244995 |
| C50  | 6.556637  | -4.889473 | -3.233092 |
| C51  | 7.543897  | -5.844399 | -3.002871 |
| H52  | 9.638687  | -6.156461 | -2.602020 |
| H53  | 10.180389 | -3.733572 | -2.612091 |
| N54  | 5.798246  | -2.587790 | -3.534389 |
| H55  | 5.532577  | -5.190042 | -3.428758 |
| H56  | 7.295862  | -6.899478 | -3.019121 |
| H57  | 5.677744  | -2.422295 | -4.523873 |
| C58  | 8.556723  | -1.613243 | -2.982993 |
| H59  | 8.525659  | -1.285686 | -1.939339 |
| H60  | 7.803700  | -1.046495 | -3.526988 |
| C61  | 9.958202  | -1.316923 | -3.540363 |
| O62  | 10.061184 | -0.960755 | -4.735399 |
| O63  | 10.932799 | -1.474969 | -2.745311 |
| H64  | -1.406825 | 0.068770  | 4.069982  |
| H65  | 0.713178  | -4.773600 | 2.213297  |
| H66  | -1.496043 | -4.958975 | 0.622315  |
| H67  | -3.928203 | -1.833292 | -2.726249 |
| H68  | -3.490660 | 0.786615  | -3.621626 |
| H69  | -0.570732 | 4.691372  | -2.097479 |
| H70  | 1.427055  | 5.126909  | -0.474304 |
| H71  | 4.212992  | 1.759750  | 2.801366  |
| H72  | 3.845357  | -0.818794 | 3.666282  |

Diclofenac 4'-3 Reactant Complex Doublet

|     |           |           |           |
|-----|-----------|-----------|-----------|
| C1  | -2.105625 | 0.200934  | 3.178028  |
| S2  | -1.362513 | 1.235220  | 1.857941  |
| H3  | -3.116627 | 0.586627  | 3.344800  |
| H4  | -2.192915 | -0.829522 | 2.821398  |
| O5  | 1.032836  | -0.590560 | -1.074902 |
| Fe6 | 0.041224  | 0.020657  | 0.078024  |
| N7  | -0.323071 | -1.835339 | 0.809092  |
| N8  | -1.601898 | -0.121904 | -1.102369 |
| N9  | 0.234937  | 1.983420  | -0.428138 |
| N10 | 1.528176  | 0.242944  | 1.425120  |
| C11 | 0.499310  | -2.554734 | 1.637638  |
| C12 | 0.098954  | -3.940675 | 1.678993  |
| C13 | -0.980407 | -4.049729 | 0.851870  |
| C14 | -1.221545 | -2.734319 | 0.303737  |
| C15 | -2.342772 | -1.245340 | -1.331258 |

|      |           |           |           |
|------|-----------|-----------|-----------|
| C16  | -3.319118 | -1.003928 | -2.375062 |
| C17  | -3.157070 | 0.291508  | -2.773658 |
| C18  | -2.077529 | 0.819985  | -1.961106 |
| C19  | -0.541526 | 2.652201  | -1.329864 |
| C20  | -0.120113 | 4.026417  | -1.434866 |
| C21  | 0.925698  | 4.191913  | -0.576505 |
| C22  | 1.151679  | 2.893379  | 0.041243  |
| C23  | 2.336342  | 1.337403  | 1.570435  |
| C24  | 3.402088  | 1.049112  | 2.503275  |
| C25  | 3.228440  | -0.235714 | 2.917014  |
| C26  | 2.066216  | -0.734640 | 2.222402  |
| C27  | 1.600466  | -2.038519 | 2.305148  |
| H28  | 2.164867  | -2.728196 | 2.919570  |
| C29  | -2.172529 | -2.455602 | -0.672079 |
| H30  | -2.820470 | -3.268703 | -0.957302 |
| C31  | -1.590325 | 2.119026  | -2.061046 |
| H32  | -2.034640 | 2.769510  | -2.800580 |
| C33  | 2.168741  | 2.557576  | 0.925256  |
| H34  | 2.939782  | 3.288460  | 1.118799  |
| C35  | 4.872160  | -2.846147 | -3.467341 |
| C36  | 4.659183  | -2.684283 | -2.083875 |
| C37  | 3.401057  | -2.750406 | -1.497412 |
| C38  | 2.291156  | -3.027400 | -2.291958 |
| C39  | 2.463582  | -3.262929 | -3.652698 |
| C40  | 3.728102  | -3.149817 | -4.224702 |
| C141 | 6.032216  | -2.306674 | -1.056675 |
| H42  | 3.287935  | -2.548530 | -0.440379 |
| H43  | 1.303595  | -3.047073 | -1.850184 |
| H44  | 1.626694  | -3.530840 | -4.285428 |
| C145 | 3.875337  | -3.388306 | -5.964807 |
| C46  | 9.095114  | -5.646259 | -3.496627 |
| C47  | 9.398473  | -4.308466 | -3.248075 |
| C48  | 8.438288  | -3.296953 | -3.381537 |
| C49  | 7.150062  | -3.662016 | -3.804548 |
| C50  | 6.836822  | -5.008627 | -4.034989 |
| C51  | 7.797833  | -6.005011 | -3.879529 |
| H52  | 9.863772  | -6.408170 | -3.397290 |
| H53  | 10.404254 | -4.021100 | -2.956005 |
| N54  | 6.147821  | -2.655373 | -4.027610 |
| H55  | 5.830289  | -5.256757 | -4.354684 |
| H56  | 7.541477  | -7.041860 | -4.067469 |
| H57  | 6.127961  | -2.345340 | -4.991397 |
| C58  | 8.800754  | -1.864581 | -3.026466 |
| H59  | 9.081667  | -1.828334 | -1.970141 |
| H60  | 7.922814  | -1.234514 | -3.170986 |
| C61  | 9.957134  | -1.332567 | -3.881412 |
| O62  | 9.727480  | -1.001446 | -5.045682 |
| O63  | 11.110650 | -1.270692 | -3.315625 |
| H64  | -1.601528 | 0.150294  | 4.164058  |
| H65  | 0.618891  | -4.734535 | 2.221652  |
| H66  | -1.540831 | -4.944136 | 0.588732  |
| H67  | -4.005173 | -1.764438 | -2.740219 |
| H68  | -3.644357 | 0.909238  | -3.542023 |
| H69  | -0.600008 | 4.769782  | -2.072939 |
| H70  | 1.403619  | 5.164894  | -0.430030 |
| H71  | 4.194405  | 1.743587  | 2.763707  |
| H72  | 3.808435  | -0.822091 | 3.620946  |

Diclofenac 4'-3 Transition State Doublet

|      |           |           |           |
|------|-----------|-----------|-----------|
| C1   | -1.978502 | 0.188933  | 3.068911  |
| S2   | -1.206090 | 1.214518  | 1.753260  |
| H3   | -3.002567 | 0.557275  | 3.195532  |
| H4   | -2.029715 | -0.843204 | 2.711579  |
| O5   | 1.217314  | -0.672814 | -1.240444 |
| Fe6  | 0.183434  | -0.080292 | -0.002508 |
| N7   | -0.199037 | -1.899707 | 0.746582  |
| N8   | -1.483305 | -0.212163 | -1.168501 |
| N9   | 0.373628  | 1.895615  | -0.539230 |
| N10  | 1.648656  | 0.163012  | 1.343992  |
| C11  | 0.593856  | -2.608316 | 1.618694  |
| C12  | 0.168079  | -3.982696 | 1.687441  |
| C13  | -0.911390 | -4.094069 | 0.859868  |
| C14  | -1.126769 | -2.794793 | 0.269444  |
| C15  | -2.246211 | -1.325348 | -1.374106 |
| C16  | -3.255516 | -1.069812 | -2.384701 |
| C17  | -3.102369 | 0.228269  | -2.775587 |
| C18  | -1.991149 | 0.744861  | -1.997417 |
| C19  | -0.452324 | 2.571128  | -1.390248 |
| C20  | -0.081500 | 3.961362  | -1.459902 |
| C21  | 0.982302  | 4.135002  | -0.625530 |
| C22  | 1.260950  | 2.822397  | -0.050482 |
| C23  | 2.437044  | 1.274551  | 1.493482  |
| C24  | 3.477030  | 1.011340  | 2.462337  |
| C25  | 3.294248  | -0.263571 | 2.906670  |
| C26  | 2.155993  | -0.786137 | 2.192023  |
| C27  | 1.683849  | -2.086293 | 2.298571  |
| H28  | 2.226500  | -2.763417 | 2.945014  |
| C29  | -2.083476 | -2.527291 | -0.700424 |
| H30  | -2.757882 | -3.331485 | -0.952045 |
| C31  | -1.525214 | 2.046558  | -2.086563 |
| H32  | -2.015833 | 2.716556  | -2.777583 |
| C33  | 2.264962  | 2.495894  | 0.853771  |
| H34  | 3.013768  | 3.239226  | 1.080575  |
| C35  | 4.541463  | -2.570233 | -2.913638 |
| C36  | 4.516218  | -2.305765 | -1.522651 |
| C37  | 3.357109  | -2.212746 | -0.777999 |
| C38  | 2.089346  | -2.383806 | -1.393226 |
| C39  | 2.100285  | -2.796208 | -2.754093 |
| C40  | 3.273173  | -2.831992 | -3.485401 |
| C141 | 6.046755  | -2.013720 | -0.733895 |
| H42  | 3.419530  | -1.976322 | 0.275377  |
| H43  | 1.257705  | -2.712174 | -0.788337 |
| H44  | 1.182414  | -3.131628 | -3.214398 |
| C145 | 3.208332  | -3.310331 | -5.187203 |
| C46  | 8.766747  | -5.426022 | -3.442184 |
| C47  | 9.089948  | -4.083240 | -3.256570 |
| C48  | 8.118071  | -3.073991 | -3.284994 |
| C49  | 6.783318  | -3.455759 | -3.512243 |
| C50  | 6.455048  | -4.807267 | -3.682720 |
| C51  | 7.434805  | -5.795603 | -3.649474 |
| H52  | 9.549868  | -6.177826 | -3.436826 |
| H53  | 10.123224 | -3.786844 | -3.100244 |
| N54  | 5.722983  | -2.480858 | -3.657715 |
| H55  | 5.418172  | -5.064853 | -3.874580 |
| H56  | 7.164228  | -6.835847 | -3.805284 |
| H57  | 5.558358  | -2.246191 | -4.628767 |
| C58  | 8.548906  | -1.636514 | -3.028336 |
| H59  | 8.765576  | -1.528198 | -1.961654 |
| H60  | 7.723999  | -0.968093 | -3.273589 |



|     |           |           |           |
|-----|-----------|-----------|-----------|
| C61 | 9.798179  | -1.247490 | -3.842201 |
| O62 | 9.652055  | -0.901895 | -5.013392 |
| O63 | 10.931657 | -1.320397 | -3.236694 |
| H64 | -1.509031 | 0.152241  | 4.078363  |
| H65 | 0.676597  | -4.765945 | 2.249209  |
| H66 | -1.511075 | -4.971135 | 0.631564  |
| H67 | -3.961601 | -1.822323 | -2.727481 |
| H68 | -3.611350 | 0.861317  | -3.520276 |
| H69 | -0.614816 | 4.703126  | -2.058110 |
| H70 | 1.425645  | 5.123806  | -0.473986 |
| H71 | 4.256561  | 1.720237  | 2.725006  |
| H72 | 3.846984  | -0.829960 | 3.646172  |

Diclofenac 4'-4 Reactant Complex Doublet

|      |           |           |           |
|------|-----------|-----------|-----------|
| C1   | -2.048853 | 0.237620  | 3.077026  |
| S2   | -1.343649 | 1.270967  | 1.751854  |
| H3   | -3.058904 | 0.617564  | 3.273773  |
| H4   | -2.139289 | -0.791253 | 2.717576  |
| O5   | 1.098156  | -0.565259 | -1.105689 |
| Fe6  | 0.077201  | 0.017791  | 0.036439  |
| N7   | -0.293359 | -1.842954 | 0.756195  |
| N8   | -1.543209 | -0.125245 | -1.167634 |
| N9   | 0.280690  | 1.981132  | -0.461443 |
| N10  | 1.536478  | 0.227815  | 1.421640  |
| C11  | 0.520690  | -2.570611 | 1.585408  |
| C12  | 0.108360  | -3.952867 | 1.624564  |
| C13  | -0.974872 | -4.050300 | 0.802288  |
| C14  | -1.201218 | -2.733157 | 0.253422  |
| C15  | -2.301213 | -1.239120 | -1.387162 |
| C16  | -3.280417 | -0.986600 | -2.425417 |
| C17  | -3.100303 | 0.303173  | -2.831281 |
| C18  | -2.010388 | 0.822637  | -2.026008 |
| C19  | -0.484892 | 2.656766  | -1.367772 |
| C20  | -0.065835 | 4.034152  | -1.448280 |
| C21  | 0.968065  | 4.190733  | -0.571819 |
| C22  | 1.181273  | 2.888862  | 0.040243  |
| C23  | 2.330478  | 1.328253  | 1.594605  |
| C24  | 3.392631  | 1.034010  | 2.529532  |
| C25  | 3.233584  | -0.261738 | 2.917950  |
| C26  | 2.078996  | -0.758856 | 2.206982  |
| C27  | 1.618352  | -2.064621 | 2.267479  |
| H28  | 2.175984  | -2.761029 | 2.881091  |
| C29  | -2.151278 | -2.448193 | -0.721710 |
| H30  | -2.811488 | -3.257862 | -0.997526 |
| C31  | -1.525078 | 2.122364  | -2.116523 |
| H32  | -1.976828 | 2.779944  | -2.846986 |
| C33  | 2.169086  | 2.552169  | 0.958641  |
| H34  | 2.928781  | 3.284381  | 1.185182  |
| C35  | 4.634611  | -3.065847 | -3.264740 |
| C36  | 4.498143  | -2.707231 | -1.909289 |
| C37  | 3.281893  | -2.721622 | -1.238936 |
| C38  | 2.144297  | -3.145559 | -1.918589 |
| C39  | 2.241176  | -3.560287 | -3.242745 |
| C40  | 3.466999  | -3.499120 | -3.904027 |
| C141 | 5.922046  | -2.172358 | -1.030132 |
| H42  | 3.218095  | -2.381830 | -0.212633 |
| H43  | 1.185520  | -3.142855 | -1.414184 |
| H44  | 1.367160  | -3.905854 | -3.782088 |
| C145 | 3.511407  | -3.972858 | -5.594897 |

|     |           |           |           |
|-----|-----------|-----------|-----------|
| C46 | 8.777863  | -5.866818 | -2.903868 |
| C47 | 9.155887  | -4.527504 | -3.023653 |
| C48 | 8.244108  | -3.525950 | -3.371051 |
| C49 | 6.895991  | -3.901157 | -3.599323 |
| C50 | 6.525797  | -5.251656 | -3.486188 |
| C51 | 7.449518  | -6.227031 | -3.134608 |
| H52 | 9.509512  | -6.620695 | -2.635020 |
| H53 | 10.179212 | -4.230000 | -2.836176 |
| N54 | 5.889481  | -2.975630 | -3.939288 |
| H55 | 5.494375  | -5.522604 | -3.683783 |
| H56 | 7.131455  | -7.261224 | -3.057393 |
| H57 | 6.176069  | -2.019646 | -4.099423 |
| C58 | 8.668953  | -2.058165 | -3.432762 |
| H59 | 8.443331  | -1.594391 | -2.464547 |
| H60 | 8.089228  | -1.533402 | -4.192865 |
| C61 | 10.146341 | -1.797852 | -3.769317 |
| O62 | 10.390856 | -1.277236 | -4.873854 |
| O63 | 11.027837 | -2.122421 | -2.905345 |
| H64 | -1.526351 | 0.186472  | 4.048120  |
| H65 | 0.619034  | -4.748022 | 2.171382  |
| H66 | -1.559838 | -4.930495 | 0.547882  |
| H67 | -3.994944 | -1.733851 | -2.762450 |
| H68 | -3.589358 | 0.922235  | -3.594547 |
| H69 | -0.538598 | 4.790532  | -2.076564 |
| H70 | 1.452036  | 5.158382  | -0.410109 |
| H71 | 4.174094  | 1.736776  | 2.798581  |
| H72 | 3.819719  | -0.850229 | 3.619324  |

Diclofenac 4'-4 Transition State Doublet

|     |           |           |           |
|-----|-----------|-----------|-----------|
| C1  | -1.934508 | 0.203121  | 2.982977  |
| S2  | -1.200538 | 1.228684  | 1.657392  |
| H3  | -2.957247 | 0.567482  | 3.136835  |
| H4  | -1.996525 | -0.831104 | 2.632774  |
| O5  | 1.281612  | -0.746676 | -1.301591 |
| Fe6 | 0.214809  | -0.095778 | -0.031397 |
| N7  | -0.197003 | -1.897161 | 0.719062  |
| N8  | -1.420250 | -0.209431 | -1.235295 |
| N9  | 0.437530  | 1.890126  | -0.574069 |
| N10 | 1.646184  | 0.142644  | 1.353999  |
| C11 | 0.578392  | -2.617714 | 1.599252  |
| C12 | 0.138864  | -3.986235 | 1.657542  |
| C13 | -0.938099 | -4.081826 | 0.826920  |
| C14 | -1.130951 | -2.780007 | 0.239239  |
| C15 | -2.213065 | -1.304490 | -1.427030 |
| C16 | -3.218236 | -1.033799 | -2.436835 |
| C17 | -3.027665 | 0.252701  | -2.845728 |
| C18 | -1.904387 | 0.749781  | -2.073312 |
| C19 | -0.370161 | 2.575395  | -1.434799 |
| C20 | -0.009506 | 3.971072  | -1.470028 |
| C21 | 1.028301  | 4.137131  | -0.603715 |
| C22 | 1.293609  | 2.818590  | -0.036678 |
| C23 | 2.421721  | 1.260246  | 1.537798  |
| C24 | 3.449721  | 0.989557  | 2.516512  |
| C25 | 3.274717  | -0.295011 | 2.936708  |
| C26 | 2.147061  | -0.811374 | 2.201911  |
| C27 | 1.666252  | -2.110048 | 2.292418  |
| H28 | 2.189947  | -2.791571 | 2.949138  |
| C29 | -2.080916 | -2.500460 | -0.738677 |
| H30 | -2.770772 | -3.296658 | -0.979207 |

|      |           |           |           |
|------|-----------|-----------|-----------|
| C31  | -1.426282 | 2.049742  | -2.160566 |
| H32  | -1.910485 | 2.722845  | -2.853860 |
| C33  | 2.260173  | 2.488226  | 0.908016  |
| H34  | 2.990794  | 3.235487  | 1.178034  |
| C35  | 4.497257  | -2.736391 | -2.883819 |
| C36  | 4.504900  | -2.328034 | -1.528438 |
| C37  | 3.372007  | -2.155544 | -0.762282 |
| C38  | 2.072099  | -2.368890 | -1.332522 |
| C39  | 2.065046  | -2.931547 | -2.659855 |
| C40  | 3.221612  | -3.060816 | -3.400975 |
| C141 | 6.060563  | -1.983048 | -0.806898 |
| H42  | 3.453276  | -1.825326 | 0.263794  |
| H43  | 1.310414  | -2.771135 | -0.676298 |
| H44  | 1.127564  | -3.286060 | -3.069105 |
| C145 | 3.125962  | -3.742263 | -5.024115 |
| C46  | 8.524454  | -5.823771 | -2.969696 |
| C47  | 8.950656  | -4.498915 | -3.070954 |
| C48  | 8.065531  | -3.444223 | -3.312147 |
| C49  | 6.682200  | -3.748584 | -3.432793 |
| C50  | 6.264084  | -5.085408 | -3.348447 |
| C51  | 7.167036  | -6.118698 | -3.115687 |
| H52  | 9.242392  | -6.615791 | -2.786653 |
| H53  | 10.000070 | -4.257468 | -2.951032 |
| N54  | 5.687966  | -2.772256 | -3.670194 |
| H55  | 5.211935  | -5.303527 | -3.499894 |
| H56  | 6.816493  | -7.144243 | -3.074593 |
| H57  | 5.986905  | -1.862413 | -4.003142 |
| C58  | 8.571269  | -2.004497 | -3.406829 |
| H59  | 8.369623  | -1.503870 | -2.452481 |
| H60  | 8.012703  | -1.475433 | -4.180411 |
| C61  | 10.064596 | -1.820233 | -3.748238 |
| O62  | 10.334389 | -1.337948 | -4.863402 |
| O63  | 10.931647 | -2.158919 | -2.873256 |
| H64  | -1.452655 | 0.167469  | 3.980863  |
| H65  | 0.651180  | -4.769776 | 2.207512  |
| H66  | -1.548427 | -4.943726 | 0.579484  |
| H67  | -3.953687 | -1.768767 | -2.752655 |
| H68  | -3.519470 | 0.888176  | -3.594807 |
| H69  | -0.528902 | 4.724475  | -2.067815 |
| H70  | 1.472638  | 5.122460  | -0.433757 |
| H71  | 4.222459  | 1.701967  | 2.788481  |
| H72  | 3.832858  | -0.872664 | 3.665130  |

Diclofenac 4'-5 Reactant Complex Doublet

|     |           |           |           |
|-----|-----------|-----------|-----------|
| C1  | -1.914183 | 0.204244  | 3.146755  |
| S2  | -1.353667 | 1.284105  | 1.793588  |
| H3  | -2.950167 | 0.491248  | 3.365654  |
| H4  | -1.914002 | -0.833834 | 2.805120  |
| O5  | 1.064217  | -0.379009 | -1.087573 |
| Fe6 | 0.074509  | 0.103093  | 0.124316  |
| N7  | -0.255821 | -1.765460 | 0.847396  |
| N8  | -1.559411 | -0.075766 | -1.056455 |
| N9  | 0.275562  | 2.048564  | -0.392649 |
| N10 | 1.568148  | 0.318666  | 1.472224  |
| C11 | 0.554151  | -2.477005 | 1.693409  |
| C12 | 0.140522  | -3.855868 | 1.768930  |
| C13 | -0.955866 | -3.965575 | 0.965975  |
| C14 | -1.181031 | -2.662316 | 0.386863  |
| C15 | -2.309029 | -1.196913 | -1.258972 |

|      |           |           |           |
|------|-----------|-----------|-----------|
| C16  | -3.284437 | -0.968077 | -2.306109 |
| C17  | -3.111643 | 0.319023  | -2.727656 |
| C18  | -2.027186 | 0.856133  | -1.927680 |
| C19  | -0.470317 | 2.691290  | -1.336323 |
| C20  | -0.012201 | 4.049031  | -1.490449 |
| C21  | 1.017373  | 4.228202  | -0.616535 |
| C22  | 1.210671  | 2.950120  | 0.051537  |
| C23  | 2.389783  | 1.405527  | 1.599053  |
| C24  | 3.465866  | 1.115707  | 2.523258  |
| C25  | 3.277168  | -0.158148 | 2.960431  |
| C26  | 2.104751  | -0.651756 | 2.280918  |
| C27  | 1.642922  | -1.953552 | 2.374147  |
| H28  | 2.198330  | -2.634484 | 3.006549  |
| C29  | -2.146903 | -2.394185 | -0.576218 |
| H30  | -2.805778 | -3.210463 | -0.828822 |
| C31  | -1.522874 | 2.146310  | -2.055586 |
| H32  | -1.960103 | 2.781499  | -2.813855 |
| C33  | 2.227455  | 2.618114  | 0.941368  |
| H34  | 3.019859  | 3.333041  | 1.109345  |
| C35  | 4.595749  | -2.622398 | -2.943131 |
| C36  | 4.478387  | -2.377805 | -1.561846 |
| C37  | 3.289867  | -2.555202 | -0.866262 |
| C38  | 2.166448  | -3.013771 | -1.546380 |
| C39  | 2.227617  | -3.245866 | -2.917325 |
| C40  | 3.428126  | -3.046693 | -3.594417 |
| C141 | 5.877173  | -1.791033 | -0.689295 |
| H42  | 3.238849  | -2.310812 | 0.187046  |
| H43  | 1.233745  | -3.131221 | -1.010874 |
| H44  | 1.353958  | -3.583055 | -3.460132 |
| C145 | 3.478681  | -3.360503 | -5.331711 |
| C46  | 8.564185  | -5.624429 | -2.915675 |
| C47  | 9.006601  | -4.302249 | -2.879539 |
| C48  | 8.143561  | -3.226327 | -3.115248 |
| C49  | 6.792735  | -3.508995 | -3.392923 |
| C50  | 6.351119  | -4.841388 | -3.435133 |
| C51  | 7.223882  | -5.898097 | -3.197863 |
| H52  | 9.259762  | -6.436403 | -2.732869 |
| H53  | 10.042369 | -4.070445 | -2.663906 |
| N54  | 5.843631  | -2.452706 | -3.575655 |
| H55  | 5.308410  | -5.035847 | -3.656539 |
| H56  | 6.862142  | -6.918331 | -3.247883 |
| H57  | 5.804659  | -2.036771 | -4.497811 |
| C58  | 8.659042  | -1.795375 | -3.019915 |
| H59  | 8.639499  | -1.490302 | -1.969892 |
| H60  | 7.989889  | -1.136983 | -3.571251 |
| C61  | 10.092119 | -1.670189 | -3.562600 |
| O62  | 10.249896 | -1.386570 | -4.762162 |
| O63  | 11.030766 | -1.919917 | -2.737872 |
| H64  | -1.373564 | 0.223142  | 4.108690  |
| H65  | 0.676759  | -4.639200 | 2.312896  |
| H66  | -1.560826 | -4.840595 | 0.741331  |
| H67  | -3.980626 | -1.731991 | -2.648611 |
| H68  | -3.586832 | 0.924391  | -3.507319 |
| H69  | -0.498463 | 4.782555  | -2.128590 |
| H70  | 1.494235  | 5.197761  | -0.467860 |
| H71  | 4.275709  | 1.799917  | 2.754108  |
| H72  | 3.844562  | -0.751405 | 3.671772  |

Diclofenac 4'-5 Transition State Doublet

|      |           |           |           |
|------|-----------|-----------|-----------|
| C1   | -1.839240 | 0.162970  | 3.073142  |
| S2   | -1.242128 | 1.222820  | 1.705652  |
| H3   | -2.888550 | 0.430841  | 3.243290  |
| H4   | -1.806400 | -0.881648 | 2.754024  |
| O5   | 1.186838  | -0.564385 | -1.187879 |
| Fe6  | 0.159654  | -0.008551 | 0.091777  |
| N7   | -0.206650 | -1.831168 | 0.823918  |
| N8   | -1.482769 | -0.150328 | -1.113392 |
| N9   | 0.389451  | 1.946414  | -0.495793 |
| N10  | 1.644222  | 0.213730  | 1.415668  |
| C11  | 0.584209  | -2.546582 | 1.694684  |
| C12  | 0.157419  | -3.919554 | 1.755680  |
| C13  | -0.931224 | -4.021538 | 0.939424  |
| C14  | -1.142985 | -2.720458 | 0.354558  |
| C15  | -2.257011 | -1.256856 | -1.301254 |
| C16  | -3.255134 | -1.007252 | -2.325004 |
| C17  | -3.078072 | 0.281453  | -2.739279 |
| C18  | -1.963071 | 0.797396  | -1.966383 |
| C19  | -0.383223 | 2.607282  | -1.405774 |
| C20  | 0.035218  | 3.982748  | -1.515440 |
| C21  | 1.059219  | 4.160778  | -0.634059 |
| C22  | 1.283830  | 2.862966  | -0.010338 |
| C23  | 2.442811  | 1.319462  | 1.551684  |
| C24  | 3.497623  | 1.049714  | 2.502770  |
| C25  | 3.314472  | -0.223592 | 2.948330  |
| C26  | 2.154950  | -0.734128 | 2.258962  |
| C27  | 1.678307  | -2.032140 | 2.373112  |
| H28  | 2.218712  | -2.708953 | 3.021245  |
| C29  | -2.102292 | -2.452222 | -0.614943 |
| H30  | -2.773314 | -3.261027 | -0.859174 |
| C31  | -1.457882 | 2.081436  | -2.101833 |
| H32  | -1.920028 | 2.733090  | -2.828558 |
| C33  | 2.279707  | 2.536708  | 0.907121  |
| H34  | 3.047989  | 3.265616  | 1.113521  |
| C35  | 4.517325  | -2.444806 | -2.782292 |
| C36  | 4.506266  | -2.093162 | -1.410939 |
| C37  | 3.356547  | -1.996640 | -0.660462 |
| C38  | 2.087931  | -2.248723 | -1.252611 |
| C39  | 2.083834  | -2.699313 | -2.603285 |
| C40  | 3.248597  | -2.746619 | -3.339148 |
| C141 | 6.030915  | -1.700818 | -0.658236 |
| H42  | 3.418164  | -1.699264 | 0.376619  |
| H43  | 1.285926  | -2.601604 | -0.619936 |
| H44  | 1.156734  | -3.047037 | -3.038661 |
| C145 | 3.184171  | -3.315492 | -5.013581 |
| C46  | 8.458476  | -5.598342 | -2.832330 |
| C47  | 8.905568  | -4.279564 | -2.816589 |
| C48  | 8.042794  | -3.197235 | -3.039904 |
| C49  | 6.682795  | -3.484988 | -3.266061 |
| C50  | 6.233589  | -4.811253 | -3.281105 |
| C51  | 7.110323  | -5.873701 | -3.070792 |
| H52  | 9.159487  | -6.411220 | -2.668210 |
| H53  | 9.949958  | -4.053621 | -2.632227 |
| N54  | 5.708695  | -2.447392 | -3.513689 |
| H55  | 5.183388  | -4.997775 | -3.479755 |
| H56  | 6.747617  | -6.893871 | -3.109794 |
| H57  | 5.597848  | -2.197834 | -4.487067 |
| C58  | 8.582457  | -1.772906 | -2.998502 |
| H59  | 8.573663  | -1.430899 | -1.960194 |
| H60  | 7.914520  | -1.127156 | -3.567601 |

|     |           |           |           |
|-----|-----------|-----------|-----------|
| C61 | 10.022046 | -1.667112 | -3.541819 |
| O62 | 10.184891 | -1.358557 | -4.735826 |
| O63 | 10.955798 | -1.944524 | -2.721694 |
| H64 | -1.341548 | 0.202282  | 4.063804  |
| H65 | 0.686897  | -4.701169 | 2.299717  |
| H66 | -1.548532 | -4.886043 | 0.708701  |
| H67 | -3.973007 | -1.751924 | -2.662100 |
| H68 | -3.566667 | 0.900477  | -3.504071 |
| H69 | -0.474603 | 4.730914  | -2.121069 |
| H70 | 1.503908  | 5.143401  | -0.461305 |
| H71 | 4.277333  | 1.759222  | 2.758519  |
| H72 | 3.875500  | -0.801432 | 3.671099  |

Diclofenac 5-1 Reactant Complex Doublet

|      |           |           |           |
|------|-----------|-----------|-----------|
| C1   | -2.032900 | -0.385908 | 2.793425  |
| S2   | -1.484143 | 0.850878  | 1.577876  |
| H3   | -3.021889 | -0.079302 | 3.156664  |
| H4   | -2.138506 | -1.353647 | 2.294033  |
| O5   | 1.241071  | -0.592936 | -1.179291 |
| Fe6  | 0.136381  | -0.163062 | -0.040878 |
| N7   | -0.137634 | -2.061558 | 0.610339  |
| N8   | -1.465402 | -0.382343 | -1.264816 |
| N9   | 0.207086  | 1.820009  | -0.452374 |
| N10  | 1.564608  | 0.096380  | 1.377323  |
| C11  | 0.690153  | -2.749161 | 1.457236  |
| C12  | 0.327428  | -4.140845 | 1.510664  |
| C13  | -0.747958 | -4.289836 | 0.688783  |
| C14  | -1.019874 | -2.986643 | 0.125411  |
| C15  | -2.217905 | -1.506661 | -1.450358 |
| C16  | -3.270852 | -1.259876 | -2.415231 |
| C17  | -3.138757 | 0.036824  | -2.816729 |
| C18  | -2.016907 | 0.570716  | -2.061293 |
| C19  | -0.573293 | 2.462786  | -1.366719 |
| C20  | -0.194438 | 3.848862  | -1.457438 |
| C21  | 0.825621  | 4.047951  | -0.575840 |
| C22  | 1.075000  | 2.759101  | 0.053500  |
| C23  | 2.321725  | 1.219751  | 1.561350  |
| C24  | 3.362921  | 0.963247  | 2.534479  |
| C25  | 3.199039  | -0.321249 | 2.962589  |
| C26  | 2.107416  | -0.863702 | 2.188761  |
| C27  | 1.727465  | -2.196982 | 2.187646  |
| H28  | 2.310713  | -2.881056 | 2.788609  |
| C29  | -2.021050 | -2.717962 | -0.802663 |
| H30  | -2.697578 | -3.528874 | -1.042480 |
| C31  | -1.599019 | 1.895826  | -2.112343 |
| H32  | -2.097754 | 2.558047  | -2.807157 |
| C33  | 2.097223  | 2.446394  | 0.945876  |
| H34  | 2.823976  | 3.209995  | 1.172289  |
| C35  | 8.067858  | -1.477570 | -4.600244 |
| C36  | 8.827782  | -1.238981 | -5.784266 |
| C37  | 9.944016  | -1.973567 | -6.139357 |
| C38  | 10.432611 | -2.975558 | -5.302653 |
| C39  | 9.764058  | -3.201434 | -4.101728 |
| C40  | 8.621289  | -2.482420 | -3.755423 |
| C141 | 8.344515  | 0.038222  | -6.901260 |
| H42  | 10.400175 | -1.771216 | -7.098672 |
| H43  | 11.290159 | -3.572213 | -5.586997 |
| H44  | 10.105302 | -3.968334 | -3.418023 |
| C145 | 7.920104  | -2.920381 | -2.204599 |

|     |           |           |           |
|-----|-----------|-----------|-----------|
| C46 | 3.932412  | -1.345132 | -1.450673 |
| C47 | 3.800910  | -1.906864 | -2.716997 |
| C48 | 4.765010  | -1.713060 | -3.715903 |
| C49 | 5.906315  | -0.969966 | -3.379611 |
| C50 | 6.027621  | -0.356823 | -2.129059 |
| C51 | 5.044618  | -0.547318 | -1.161374 |
| H52 | 3.175844  | -1.515814 | -0.699323 |
| H53 | 2.933185  | -2.514559 | -2.948566 |
| N54 | 6.936990  | -0.736512 | -4.363937 |
| H55 | 6.891079  | 0.264742  | -1.928371 |
| H56 | 5.134190  | -0.053570 | -0.199337 |
| H57 | 6.598930  | -0.217996 | -5.167328 |
| C58 | 4.505806  | -2.217188 | -5.116796 |
| H59 | 5.391781  | -2.100163 | -5.747480 |
| H60 | 3.733944  | -1.597011 | -5.584278 |
| C61 | 4.067728  | -3.689517 | -5.256914 |
| O62 | 3.437128  | -3.963691 | -6.310674 |
| O63 | 4.401429  | -4.497487 | -4.362244 |
| H64 | -1.392446 | -0.565307 | 3.664793  |
| H65 | 0.829471  | -4.890383 | 2.116773  |
| H66 | -1.280794 | -5.207904 | 0.460618  |
| H67 | -4.002353 | -2.029530 | -2.658359 |
| H68 | -3.672523 | 0.664839  | -3.541288 |
| H69 | -0.708661 | 4.580183  | -2.076298 |
| H70 | 1.281341  | 5.033480  | -0.439944 |
| H71 | 4.157978  | 1.653937  | 2.799272  |
| H72 | 3.702361  | -0.850442 | 3.775851  |

Diclofenac 5-1 Transition State Doublet

|     |           |           |           |
|-----|-----------|-----------|-----------|
| C1  | -1.881155 | -0.454791 | 2.693562  |
| S2  | -1.345465 | 0.800021  | 1.489352  |
| H3  | -2.906148 | -0.205811 | 2.995243  |
| H4  | -1.901203 | -1.432813 | 2.202417  |
| O5  | 1.384148  | -0.396004 | -1.374839 |
| Fe6 | 0.251163  | -0.167656 | -0.073636 |
| N7  | 0.039749  | -2.085265 | 0.489600  |
| N8  | -1.354666 | -0.380627 | -1.325587 |
| N9  | 0.277271  | 1.831539  | -0.471227 |
| N10 | 1.678512  | 0.062714  | 1.309757  |
| C11 | 0.818683  | -2.775955 | 1.392658  |
| C12 | 0.405546  | -4.151831 | 1.474407  |
| C13 | -0.654282 | -4.287370 | 0.629353  |
| C14 | -0.876151 | -2.996105 | 0.020533  |
| C15 | -2.100811 | -1.506395 | -1.519162 |
| C16 | -3.177550 | -1.249648 | -2.458308 |
| C17 | -3.062496 | 0.054837  | -2.838949 |
| C18 | -1.931256 | 0.585653  | -2.092875 |
| C19 | -0.510940 | 2.470706  | -1.381489 |
| C20 | -0.156000 | 3.863184  | -1.449501 |
| C21 | 0.843723  | 4.073423  | -0.549856 |
| C22 | 1.112613  | 2.775079  | 0.068697  |
| C23 | 2.388013  | 1.215007  | 1.536255  |
| C24 | 3.417661  | 0.962846  | 2.522878  |
| C25 | 3.274463  | -0.333667 | 2.931822  |
| C26 | 2.212192  | -0.889802 | 2.132489  |
| C27 | 1.836415  | -2.225776 | 2.145134  |
| H28 | 2.390838  | -2.899373 | 2.782722  |
| C29 | -1.882575 | -2.726134 | -0.896912 |
| H30 | -2.559711 | -3.535692 | -1.134718 |

|      |           |           |           |
|------|-----------|-----------|-----------|
| C31  | -1.533914 | 1.911623  | -2.128912 |
| H32  | -2.044663 | 2.579117  | -2.808876 |
| C33  | 2.129541  | 2.458116  | 0.970141  |
| H34  | 2.825315  | 3.233474  | 1.249480  |
| C35  | 7.330074  | -1.541523 | -4.130088 |
| C36  | 8.128835  | -1.336982 | -5.298015 |
| C37  | 9.321249  | -2.003490 | -5.538225 |
| C38  | 9.811987  | -2.931548 | -4.623229 |
| C39  | 9.044335  | -3.202396 | -3.490387 |
| C40  | 7.839004  | -2.542096 | -3.262007 |
| C141 | 7.612345  | -0.245091 | -6.575235 |
| H42  | 9.823760  | -1.824003 | -6.481010 |
| H43  | 10.728724 | -3.475453 | -4.820642 |
| H44  | 9.346838  | -3.968038 | -2.790705 |
| C145 | 6.956795  | -3.063709 | -1.844854 |
| C46  | 2.856499  | -1.604372 | -1.366290 |
| C47  | 2.928358  | -2.103653 | -2.702290 |
| C48  | 3.980128  | -1.809243 | -3.561598 |
| C49  | 5.067793  | -1.075215 | -3.049037 |
| C50  | 5.034256  | -0.560087 | -1.736534 |
| C51  | 3.970079  | -0.830866 | -0.900483 |
| H52  | 2.283984  | -2.180606 | -0.648052 |
| H53  | 2.131809  | -2.751429 | -3.053301 |
| N54  | 6.193631  | -0.778222 | -3.910823 |
| H55  | 5.868515  | 0.040761  | -1.389822 |
| H56  | 3.966753  | -0.450765 | 0.113960  |
| H57  | 5.912532  | -0.221519 | -4.712486 |
| C58  | 3.961310  | -2.309178 | -4.987767 |
| H59  | 4.882283  | -2.031919 | -5.508993 |
| H60  | 3.149908  | -1.841291 | -5.549730 |
| C61  | 3.832476  | -3.835766 | -5.138106 |
| O62  | 3.256608  | -4.228308 | -6.183863 |
| O63  | 4.336053  | -4.558651 | -4.252455 |
| H64  | -1.291231 | -0.587997 | 3.608595  |
| H65  | 0.867150  | -4.905347 | 2.108416  |
| H66  | -1.236326 | -5.184655 | 0.434728  |
| H67  | -3.920115 | -2.010516 | -2.691687 |
| H68  | -3.608731 | 0.688690  | -3.551996 |
| H69  | -0.683512 | 4.575310  | -2.080436 |
| H70  | 1.271660  | 5.067171  | -0.407480 |
| H71  | 4.192411  | 1.670725  | 2.798285  |
| H72  | 3.757068  | -0.876211 | 3.748924  |

Diclofenac 5-2 Reactant Complex Doublet

|     |           |           |           |
|-----|-----------|-----------|-----------|
| C1  | -1.962277 | -0.533220 | 3.076824  |
| S2  | -1.364561 | 0.570791  | 1.754001  |
| H3  | -3.008006 | -0.262256 | 3.270994  |
| H4  | -1.942094 | -1.566238 | 2.718446  |
| O5  | 0.869236  | -1.026233 | -1.334815 |
| Fe6 | -0.069307 | -0.532072 | -0.085555 |
| N7  | -0.364287 | -2.395411 | 0.648083  |
| N8  | -1.778255 | -0.702723 | -1.159343 |
| N9  | 0.098105  | 1.422053  | -0.626088 |
| N10 | 1.482783  | -0.304757 | 1.174864  |
| C11 | 0.498122  | -3.104727 | 1.441701  |
| C12 | 0.092712  | -4.483284 | 1.539148  |
| C13 | -1.054307 | -4.594843 | 0.812164  |
| C14 | -1.321169 | -3.289766 | 0.251082  |
| C15 | -2.574408 | -1.801219 | -1.269562 |



|      |           |           |           |
|------|-----------|-----------|-----------|
| C16  | -3.655356 | -1.557536 | -2.201822 |
| C17  | -3.485834 | -0.293753 | -2.678952 |
| C18  | -2.313768 | 0.229905  | -1.995538 |
| C19  | -0.732960 | 2.064898  | -1.489511 |
| C20  | -0.282319 | 3.414829  | -1.704587 |
| C21  | 0.864162  | 3.581389  | -0.985281 |
| C22  | 1.087445  | 2.317350  | -0.288382 |
| C23  | 2.278476  | 0.798919  | 1.285587  |
| C24  | 3.354091  | 0.542302  | 2.220215  |
| C25  | 3.180686  | -0.731074 | 2.682343  |
| C26  | 2.031129  | -1.257637 | 1.993583  |
| C27  | 1.602648  | -2.570857 | 2.081459  |
| H28  | 2.195104  | -3.252092 | 2.676245  |
| C29  | -2.369765 | -3.005802 | -0.609089 |
| H30  | -3.070101 | -3.803837 | -0.805876 |
| C31  | -1.838077 | 1.522296  | -2.129927 |
| H32  | -2.338394 | 2.170249  | -2.837455 |
| C33  | 2.100505  | 2.002643  | 0.611492  |
| H34  | 2.850082  | 2.744657  | 0.832881  |
| C35  | 7.459000  | -3.556934 | -2.881559 |
| C36  | 8.129338  | -2.571195 | -2.131222 |
| C37  | 9.281386  | -2.847743 | -1.402201 |
| C38  | 9.827885  | -4.131004 | -1.437564 |
| C39  | 9.211150  | -5.131029 | -2.190484 |
| C40  | 8.032858  | -4.841686 | -2.875846 |
| C141 | 7.486216  | -0.949079 | -2.084601 |
| H42  | 9.730652  | -2.067779 | -0.803555 |
| H43  | 10.724436 | -4.353112 | -0.871334 |
| H44  | 9.611843  | -6.137474 | -2.217920 |
| C145 | 7.213032  | -6.156607 | -3.706656 |
| C46  | 2.599731  | -3.345447 | -1.474560 |
| C47  | 2.648141  | -3.116347 | -2.854233 |
| C48  | 3.848791  | -3.034411 | -3.557525 |
| C49  | 5.050473  | -3.246321 | -2.839152 |
| C50  | 5.006644  | -3.427682 | -1.447899 |
| C51  | 3.790397  | -3.465989 | -0.767252 |
| H52  | 1.645520  | -3.386988 | -0.968777 |
| H53  | 1.725402  | -2.976084 | -3.398909 |
| N54  | 6.258377  | -3.276872 | -3.544298 |
| H55  | 5.932895  | -3.534119 | -0.901758 |
| H56  | 3.780036  | -3.583001 | 0.312126  |
| H57  | 6.173519  | -3.589448 | -4.520638 |
| C58  | 3.834402  | -2.629650 | -5.025010 |
| H59  | 4.512366  | -1.779888 | -5.156244 |
| H60  | 2.827325  | -2.309374 | -5.283624 |
| C61  | 4.269298  | -3.698554 | -6.048182 |
| O62  | 5.509468  | -3.970827 | -6.095106 |
| O63  | 3.387918  | -4.204585 | -6.763010 |
| H64  | -1.452730 | -0.533589 | 4.056741  |
| H65  | 0.622425  | -5.256721 | 2.095618  |
| H66  | -1.654177 | -5.480079 | 0.639086  |
| H67  | -4.409467 | -2.309694 | -2.408718 |
| H68  | -4.029369 | 0.310981  | -3.414994 |
| H69  | -0.827227 | 4.137916  | -2.311331 |
| H70  | 1.407981  | 4.532796  | -1.030506 |
| H71  | 4.167532  | 1.235156  | 2.409173  |
| H72  | 3.735786  | -1.302401 | 3.423090  |

Diclofenac 5-2 Transition State Doublet

|      |           |           |           |
|------|-----------|-----------|-----------|
| C1   | -1.906490 | -0.568940 | 2.970981  |
| S2   | -1.300869 | 0.523515  | 1.626779  |
| H3   | -2.961641 | -0.318150 | 3.133021  |
| H4   | -1.853112 | -1.608711 | 2.634722  |
| O5   | 1.084370  | -0.944788 | -1.382439 |
| Fe6  | 0.022700  | -0.587822 | -0.070961 |
| N7   | -0.263330 | -2.449450 | 0.602196  |
| N8   | -1.675254 | -0.773742 | -1.215193 |
| N9   | 0.183566  | 1.366492  | -0.667503 |
| N10  | 1.552996  | -0.365569 | 1.177059  |
| C11  | 0.561877  | -3.151255 | 1.452793  |
| C12  | 0.137673  | -4.525528 | 1.544276  |
| C13  | -0.994862 | -4.632476 | 0.794554  |
| C14  | -1.237806 | -3.337981 | 0.206240  |
| C15  | -2.490074 | -1.859112 | -1.307665 |
| C16  | -3.590865 | -1.598850 | -2.215644 |
| C17  | -3.415864 | -0.335469 | -2.693311 |
| C18  | -2.221417 | 0.172347  | -2.035600 |
| C19  | -0.656793 | 2.003238  | -1.527779 |
| C20  | -0.229060 | 3.364569  | -1.717409 |
| C21  | 0.909787  | 3.540326  | -0.989386 |
| C22  | 1.152650  | 2.267184  | -0.306935 |
| C23  | 2.330724  | 0.752353  | 1.280302  |
| C24  | 3.389260  | 0.511006  | 2.234486  |
| C25  | 3.208648  | -0.753863 | 2.720701  |
| C26  | 2.063058  | -1.293408 | 2.036220  |
| C27  | 1.627880  | -2.610427 | 2.142818  |
| H28  | 2.191185  | -3.281358 | 2.777827  |
| C29  | -2.291381 | -3.063595 | -0.647890 |
| H30  | -3.003010 | -3.854694 | -0.827414 |
| C31  | -1.756790 | 1.463929  | -2.173124 |
| H32  | -2.261416 | 2.108452  | -2.875308 |
| C33  | 2.154013  | 1.959814  | 0.609694  |
| H34  | 2.888797  | 2.711317  | 0.846462  |
| C35  | 7.119821  | -3.521778 | -2.684523 |
| C36  | 7.876694  | -2.519626 | -2.050138 |
| C37  | 9.080561  | -2.795675 | -1.407531 |
| C38  | 9.601067  | -4.084458 | -1.433540 |
| C39  | 8.911735  | -5.096932 | -2.101768 |
| C40  | 7.688572  | -4.811742 | -2.703848 |
| C141 | 7.333665  | -0.866002 | -2.082873 |
| H42  | 9.597365  | -1.995472 | -0.893533 |
| H43  | 10.541117 | -4.302226 | -0.937974 |
| H44  | 9.301204  | -6.106577 | -2.141746 |
| C145 | 6.841427  | -6.128860 | -3.489875 |
| C46  | 2.182546  | -2.606184 | -1.479974 |
| C47  | 2.328106  | -2.743879 | -2.895915 |
| C48  | 3.538413  | -2.796039 | -3.541683 |
| C49  | 4.726208  | -2.899653 | -2.732299 |
| C50  | 4.616267  | -2.654632 | -1.333019 |
| C51  | 3.395181  | -2.486405 | -0.729070 |
| H52  | 1.310735  | -3.026138 | -0.991595 |
| H53  | 1.433264  | -2.798757 | -3.493650 |
| N54  | 5.891732  | -3.264101 | -3.330805 |
| H55  | 5.519012  | -2.623642 | -0.737725 |
| H56  | 3.354376  | -2.320212 | 0.336021  |
| H57  | 5.812787  | -3.582189 | -4.327665 |
| C58  | 3.579458  | -2.611764 | -5.053421 |
| H59  | 4.193272  | -1.725464 | -5.254694 |
| H60  | 2.568787  | -2.391057 | -5.387319 |

|     |           |           |           |
|-----|-----------|-----------|-----------|
| C61 | 4.131902  | -3.727011 | -5.960755 |
| O62 | 5.367649  | -4.017908 | -5.837576 |
| O63 | 3.350044  | -4.232755 | -6.775853 |
| H64 | -1.430568 | -0.549330 | 3.977821  |
| H65 | 0.652061  | -5.302400 | 2.106204  |
| H66 | -1.625462 | -5.502239 | 0.629475  |
| H67 | -4.380051 | -2.319441 | -2.404874 |
| H68 | -3.975601 | 0.281181  | -3.412491 |
| H69 | -0.795079 | 4.097874  | -2.292547 |
| H70 | 1.428684  | 4.502240  | -1.023246 |
| H71 | 4.185870  | 1.222304  | 2.423710  |
| H72 | 3.762539  | -1.318763 | 3.461927  |

Diclofenac 5-3 Reactant Complex Doublet

|      |           |           |           |
|------|-----------|-----------|-----------|
| C1   | -1.990740 | -0.456018 | 3.063474  |
| S2   | -1.444640 | 0.685512  | 1.748752  |
| H3   | -3.052457 | -0.241437 | 3.237970  |
| H4   | -1.908220 | -1.483967 | 2.701058  |
| O5   | 0.950113  | -0.846621 | -1.252394 |
| Fe6  | -0.062636 | -0.361225 | -0.059272 |
| N7   | -0.328564 | -2.230263 | 0.658367  |
| N8   | -1.740391 | -0.572748 | -1.170573 |
| N9   | 0.067785  | 1.596887  | -0.598730 |
| N10  | 1.426287  | -0.074824 | 1.261759  |
| C11  | 0.538093  | -2.910444 | 1.472206  |
| C12  | 0.188432  | -4.305107 | 1.539662  |
| C13  | -0.933103 | -4.454738 | 0.782854  |
| C14  | -1.242146 | -3.157316 | 0.231832  |
| C15  | -2.530436 | -1.676915 | -1.266001 |
| C16  | -3.627848 | -1.442226 | -2.179593 |
| C17  | -3.464251 | -0.186545 | -2.678545 |
| C18  | -2.292757 | 0.349823  | -2.007246 |
| C19  | -0.753978 | 2.214182  | -1.487824 |
| C20  | -0.337722 | 3.573944  | -1.698619 |
| C21  | 0.779210  | 3.780902  | -0.946069 |
| C22  | 1.017966  | 2.525543  | -0.235788 |
| C23  | 2.177695  | 1.056793  | 1.404169  |
| C24  | 3.211655  | 0.840754  | 2.392036  |
| C25  | 3.065103  | -0.436709 | 2.849663  |
| C26  | 1.969461  | -1.006897 | 2.109264  |
| C27  | 1.585515  | -2.334276 | 2.170018  |
| H28  | 2.163669  | -2.993644 | 2.805640  |
| C29  | -2.302538 | -2.888368 | -0.624844 |
| H30  | -2.993991 | -3.694678 | -0.835101 |
| C31  | -1.835298 | 1.650548  | -2.150314 |
| H32  | -2.332581 | 2.292685  | -2.863846 |
| C33  | 1.997296  | 2.249331  | 0.710580  |
| H34  | 2.701954  | 3.022457  | 0.970774  |
| C35  | 7.518740  | -3.373633 | -2.809273 |
| C36  | 8.158573  | -2.392860 | -2.025726 |
| C37  | 9.315557  | -2.658546 | -1.300843 |
| C38  | 9.899923  | -3.922539 | -1.373322 |
| C39  | 9.310369  | -4.918492 | -2.152385 |
| C40  | 8.122914  | -4.643196 | -2.830041 |
| C141 | 7.480720  | -0.786595 | -1.941993 |
| H42  | 9.743523  | -1.884177 | -0.678474 |
| H43  | 10.805109 | -4.133405 | -0.815367 |
| H44  | 9.735620  | -5.914810 | -2.202714 |
| C145 | 7.327569  | -5.966065 | -3.667801 |

|     |           |           |           |
|-----|-----------|-----------|-----------|
| C46 | 2.632983  | -3.198584 | -1.457841 |
| C47 | 2.701037  | -2.917373 | -2.825218 |
| C48 | 3.907819  | -2.854481 | -3.520654 |
| C49 | 5.098920  | -3.117304 | -2.803889 |
| C50 | 5.034112  | -3.404656 | -1.432810 |
| C51 | 3.812633  | -3.433688 | -0.760643 |
| H52 | 1.672448  | -3.221930 | -0.960659 |
| H53 | 1.785755  | -2.735503 | -3.370627 |
| N54 | 6.322519  | -3.101992 | -3.485461 |
| H55 | 5.950590  | -3.625983 | -0.904297 |
| H56 | 3.793245  | -3.647170 | 0.303458  |
| H57 | 6.262275  | -3.396176 | -4.468452 |
| C58 | 3.914468  | -2.442200 | -4.986336 |
| H59 | 4.600295  | -1.597071 | -5.102842 |
| H60 | 2.912439  | -2.117407 | -5.262225 |
| C61 | 4.354715  | -3.530564 | -5.989535 |
| O62 | 5.601154  | -3.772598 | -6.056242 |
| O63 | 3.475238  | -4.091475 | -6.665429 |
| H64 | -1.497234 | -0.428838 | 4.057057  |
| H65 | 0.743549  | -5.061556 | 2.093522  |
| H66 | -1.488832 | -5.361842 | 0.582092  |
| H67 | -4.420814 | -2.170858 | -2.287314 |
| H68 | -4.003521 | 0.401923  | -3.430188 |
| H69 | -0.888303 | 4.249508  | -2.350403 |
| H70 | 1.299319  | 4.748278  | -0.974193 |
| H71 | 3.995304  | 1.562714  | 2.597158  |
| H72 | 3.622338  | -0.994852 | 3.600932  |

Diclofenac 5-3 Reactant Complex Quartet

|     |           |           |           |
|-----|-----------|-----------|-----------|
| C1  | -2.040494 | -0.463863 | 3.089597  |
| S2  | -1.420871 | 0.671609  | 1.798641  |
| H3  | -3.106274 | -0.229241 | 3.219527  |
| H4  | -1.964757 | -1.497525 | 2.729640  |
| O5  | 0.961599  | -0.832522 | -1.282581 |
| Fe6 | -0.042046 | -0.320490 | -0.110780 |
| N7  | -0.302887 | -2.175247 | 0.616938  |
| N8  | -1.730618 | -0.540246 | -1.206276 |
| N9  | 0.050899  | 1.647361  | -0.633349 |
| N10 | 1.427951  | -0.004619 | 1.215190  |
| C11 | 0.582249  | -2.853302 | 1.414463  |
| C12 | 0.245962  | -4.249322 | 1.482647  |
| C13 | -0.891545 | -4.405002 | 0.747219  |
| C14 | -1.215028 | -3.110761 | 0.198053  |
| C15 | -2.520625 | -1.650952 | -1.307410 |
| C16 | -3.616250 | -1.417192 | -2.226191 |
| C17 | -3.450456 | -0.157836 | -2.724331 |
| C18 | -2.288635 | 0.379750  | -2.046008 |
| C19 | -0.785010 | 2.266293  | -1.514060 |
| C20 | -0.401337 | 3.636192  | -1.708692 |
| C21 | 0.716799  | 3.855269  | -0.956569 |
| C22 | 0.983923  | 2.597040  | -0.265233 |
| C23 | 2.156434  | 1.142521  | 1.378225  |
| C24 | 3.175073  | 0.944177  | 2.382775  |
| C25 | 3.050047  | -0.341194 | 2.830650  |
| C26 | 1.982942  | -0.929635 | 2.064833  |
| C27 | 1.628656  | -2.268252 | 2.108763  |
| H28 | 2.225488  | -2.923926 | 2.733063  |
| C29 | -2.281532 | -2.855239 | -0.656088 |
| H30 | -2.960753 | -3.676239 | -0.858139 |

|     |           |           |           |
|-----|-----------|-----------|-----------|
| C31 | -1.856203 | 1.688691  | -2.179183 |
| H32 | -2.373275 | 2.323854  | -2.887864 |
| C33 | 1.963523  | 2.336145  | 0.687108  |
| H34 | 2.654791  | 3.124640  | 0.951175  |
| C35 | 7.627246  | -3.799713 | -2.715260 |
| C36 | 8.204653  | -2.715704 | -2.009391 |
| C37 | 9.415770  | -2.831212 | -1.330986 |
| C38 | 10.125605 | -4.031683 | -1.383433 |
| C39 | 9.617650  | -5.114478 | -2.103521 |
| C40 | 8.377470  | -4.996299 | -2.732307 |
| C41 | 7.405949  | -1.163009 | -2.025863 |
| H42 | 9.799325  | -1.978920 | -0.781557 |
| H43 | 11.071925 | -4.127517 | -0.857730 |
| H44 | 10.154940 | -6.056788 | -2.150075 |
| C45 | 7.716227  | -6.409558 | -3.542544 |
| C46 | 2.758790  | -2.991573 | -1.392797 |
| C47 | 2.932460  | -2.636712 | -2.732698 |
| C48 | 4.126328  | -2.843045 | -3.423713 |
| C49 | 5.200515  | -3.447733 | -2.727345 |
| C50 | 5.028091  | -3.830497 | -1.386575 |
| C51 | 3.825211  | -3.597121 | -0.723226 |
| H52 | 1.811802  | -2.818554 | -0.901043 |
| H53 | 2.119305  | -2.144857 | -3.247946 |
| N54 | 6.412985  | -3.688122 | -3.377754 |
| H55 | 5.846789  | -4.342652 | -0.888428 |
| H56 | 3.716657  | -3.908313 | 0.313331  |
| H57 | 6.396716  | -3.748319 | -4.412345 |
| C58 | 4.281740  | -2.324428 | -4.840722 |
| H59 | 5.089400  | -1.583321 | -4.832312 |
| H60 | 3.354399  | -1.824383 | -5.133080 |
| C61 | 4.632244  | -3.373264 | -5.925157 |
| O62 | 5.879070  | -3.645189 | -6.062250 |
| O63 | 3.702407  | -3.877745 | -6.583406 |
| H64 | -1.588811 | -0.449025 | 4.109330  |
| H65 | 0.805389  | -5.002821 | 2.031434  |
| H66 | -1.443363 | -5.319860 | 0.569054  |
| H67 | -4.428439 | -2.118630 | -2.379273 |
| H68 | -3.990291 | 0.423575  | -3.482279 |
| H69 | -0.961958 | 4.327161  | -2.337505 |
| H70 | 1.203781  | 4.837245  | -0.981781 |
| H71 | 3.936885  | 1.684416  | 2.606447  |
| H72 | 3.606637  | -0.887968 | 3.590639  |

Diclofenac 5-3 Transition State Doublet

|     |           |           |           |
|-----|-----------|-----------|-----------|
| C1  | -1.925955 | -0.490328 | 2.969260  |
| S2  | -1.356181 | 0.641186  | 1.639306  |
| H3  | -2.995994 | -0.299170 | 3.110787  |
| H4  | -1.807510 | -1.523193 | 2.630413  |
| O5  | 1.125369  | -0.779116 | -1.322953 |
| Fe6 | 0.037688  | -0.418083 | -0.041215 |
| N7  | -0.217316 | -2.278806 | 0.630665  |
| N8  | -1.639716 | -0.635391 | -1.200867 |
| N9  | 0.164904  | 1.541162  | -0.633788 |
| N10 | 1.531330  | -0.144623 | 1.243625  |
| C11 | 0.621090  | -2.955409 | 1.488174  |
| C12 | 0.259276  | -4.347411 | 1.545733  |
| C13 | -0.851368 | -4.493988 | 0.768770  |
| C14 | -1.146272 | -3.201935 | 0.201266  |
| C15 | -2.438713 | -1.732502 | -1.286887 |

|      |           |           |           |
|------|-----------|-----------|-----------|
| C16  | -3.553265 | -1.483383 | -2.180195 |
| C17  | -3.393035 | -0.225718 | -2.671412 |
| C18  | -2.205445 | 0.303512  | -2.020293 |
| C19  | -0.672439 | 2.152484  | -1.514731 |
| C20  | -0.277001 | 3.521952  | -1.707294 |
| C21  | 0.833498  | 3.738960  | -0.949283 |
| C22  | 1.097607  | 2.474623  | -0.254841 |
| C23  | 2.259824  | 1.001925  | 1.378101  |
| C24  | 3.274433  | 0.807829  | 2.386779  |
| C25  | 3.121531  | -0.461342 | 2.872018  |
| C26  | 2.036474  | -1.048829 | 2.130422  |
| C27  | 1.644104  | -2.380941 | 2.217783  |
| H28  | 2.205788  | -3.033817 | 2.872314  |
| C29  | -2.208381 | -2.944613 | -0.651121 |
| H30  | -2.899101 | -3.752078 | -0.855888 |
| C31  | -1.758281 | 1.598362  | -2.165674 |
| H32  | -2.268798 | 2.246235  | -2.865340 |
| C33  | 2.076132  | 2.200217  | 0.692204  |
| H34  | 2.782333  | 2.971829  | 0.952987  |
| C35  | 7.164659  | -3.318548 | -2.576593 |
| C36  | 7.893095  | -2.313422 | -1.915746 |
| C37  | 9.096120  | -2.572012 | -1.264036 |
| C38  | 9.651026  | -3.847134 | -1.314903 |
| C39  | 8.994858  | -4.858195 | -2.013733 |
| C40  | 7.769242  | -4.593319 | -2.620489 |
| C141 | 7.328247  | -0.667930 | -1.936564 |
| H42  | 9.585902  | -1.769989 | -0.730608 |
| H43  | 10.594167 | -4.050235 | -0.819002 |
| H44  | 9.409750  | -5.857623 | -2.076964 |
| C145 | 6.975259  | -5.917641 | -3.442281 |
| C46  | 2.187792  | -2.464504 | -1.441922 |
| C47  | 2.356017  | -2.611150 | -2.855458 |
| C48  | 3.581033  | -2.640724 | -3.477728 |
| C49  | 4.756449  | -2.729592 | -2.648744 |
| C50  | 4.617878  | -2.489732 | -1.252771 |
| C51  | 3.385508  | -2.335330 | -0.669826 |
| H52  | 1.305864  | -2.878796 | -0.970692 |
| H53  | 1.471731  | -2.702035 | -3.466262 |
| N54  | 5.938185  | -3.078656 | -3.232377 |
| H55  | 5.510972  | -2.443189 | -0.642021 |
| H56  | 3.319095  | -2.163124 | 0.394063  |
| H57  | 5.882345  | -3.388989 | -4.230547 |
| C58  | 3.653991  | -2.451645 | -4.987969 |
| H59  | 4.275110  | -1.566267 | -5.171377 |
| H60  | 2.650810  | -2.229380 | -5.341723 |
| C61  | 4.227329  | -3.571409 | -5.878926 |
| O62  | 5.469881  | -3.823866 | -5.764707 |
| O63  | 3.448659  | -4.123040 | -6.669721 |
| H64  | -1.467693 | -0.445705 | 3.985381  |
| H65  | 0.797650  | -5.105829 | 2.109884  |
| H66  | -1.432041 | -5.391866 | 0.579680  |
| H67  | -4.370856 | -2.186479 | -2.280960 |
| H68  | -3.948863 | 0.371200  | -3.408110 |
| H69  | -0.856980 | 4.198683  | -2.333315 |
| H70  | 1.320738  | 4.719064  | -0.959670 |
| H71  | 4.023575  | 1.559692  | 2.605907  |
| H72  | 3.666433  | -1.002296 | 3.638807  |

Diclofenac 5-3 Transition State Quartet

|      |           |           |           |
|------|-----------|-----------|-----------|
| C1   | -1.943098 | -0.504869 | 2.981689  |
| S2   | -1.329603 | 0.614728  | 1.664592  |
| H3   | -3.012821 | -0.299781 | 3.099030  |
| H4   | -1.829308 | -1.539213 | 2.643709  |
| O5   | 1.179185  | -1.051355 | -1.254919 |
| Fe6  | 0.061175  | -0.392031 | -0.106848 |
| N7   | -0.254029 | -2.247402 | 0.639118  |
| N8   | -1.623519 | -0.613048 | -1.250083 |
| N9   | 0.187814  | 1.538115  | -0.686061 |
| N10  | 1.554665  | -0.108212 | 1.192096  |
| C11  | 0.602809  | -2.919295 | 1.472063  |
| C12  | 0.245568  | -4.312834 | 1.536234  |
| C13  | -0.869859 | -4.462091 | 0.766178  |
| C14  | -1.169250 | -3.168117 | 0.202494  |
| C15  | -2.437769 | -1.708083 | -1.315814 |
| C16  | -3.554721 | -1.455363 | -2.206168 |
| C17  | -3.386951 | -0.202074 | -2.707760 |
| C18  | -2.191973 | 0.321008  | -2.069247 |
| C19  | -0.662016 | 2.161972  | -1.556039 |
| C20  | -0.286673 | 3.535962  | -1.719763 |
| C21  | 0.822601  | 3.755579  | -0.958286 |
| C22  | 1.104168  | 2.490720  | -0.283883 |
| C23  | 2.271321  | 1.035830  | 1.349254  |
| C24  | 3.271544  | 0.843762  | 2.373484  |
| C25  | 3.124423  | -0.432051 | 2.842280  |
| C26  | 2.052793  | -1.021107 | 2.076927  |
| C27  | 1.642834  | -2.342690 | 2.180821  |
| H28  | 2.202439  | -2.993347 | 2.839448  |
| C29  | -2.225382 | -2.911166 | -0.663122 |
| H30  | -2.920943 | -3.715525 | -0.861769 |
| C31  | -1.746737 | 1.616939  | -2.214775 |
| H32  | -2.259759 | 2.268338  | -2.908074 |
| C33  | 2.077944  | 2.236525  | 0.671438  |
| H34  | 2.756137  | 3.025121  | 0.951421  |
| C35  | 7.227014  | -3.415213 | -2.601691 |
| C36  | 7.927804  | -2.404818 | -1.916468 |
| C37  | 9.139986  | -2.643506 | -1.274210 |
| C38  | 9.730391  | -3.901697 | -1.356347 |
| C39  | 9.102232  | -4.915533 | -2.078119 |
| C40  | 7.866966  | -4.671073 | -2.675564 |
| C141 | 7.311371  | -0.776115 | -1.912624 |
| H42  | 9.611958  | -1.839736 | -0.725335 |
| H43  | 10.679057 | -4.091455 | -0.864519 |
| H44  | 9.545697  | -5.900827 | -2.163422 |
| C145 | 7.104328  | -5.998592 | -3.525115 |
| C46  | 2.186132  | -2.644543 | -1.499074 |
| C47  | 2.406998  | -2.671068 | -2.919577 |
| C48  | 3.651198  | -2.686164 | -3.506611 |
| C49  | 4.803013  | -2.869373 | -2.667629 |
| C50  | 4.624795  | -2.782649 | -1.259109 |
| C51  | 3.379653  | -2.660645 | -0.693069 |
| H52  | 1.306711  | -3.132964 | -1.099934 |
| H53  | 1.544589  | -2.704275 | -3.565173 |
| N54  | 6.001124  | -3.181955 | -3.254827 |
| H55  | 5.498292  | -2.861799 | -0.624809 |
| H56  | 3.282417  | -2.644017 | 0.383046  |
| H57  | 5.963280  | -3.449720 | -4.262180 |
| C58  | 3.782615  | -2.414190 | -4.998876 |
| H59  | 4.469491  | -1.568961 | -5.112895 |
| H60  | 2.808516  | -2.107328 | -5.372321 |

|     |           |           |           |
|-----|-----------|-----------|-----------|
| C61 | 4.308189  | -3.533917 | -5.918667 |
| O62 | 5.550845  | -3.806144 | -5.842830 |
| O63 | 3.496514  | -4.070492 | -6.682925 |
| H64 | -1.500518 | -0.461883 | 4.006131  |
| H65 | 0.792490  | -5.070713 | 2.093556  |
| H66 | -1.442446 | -5.362385 | 0.571169  |
| H67 | -4.384328 | -2.144867 | -2.313834 |
| H68 | -3.946425 | 0.392272  | -3.444368 |
| H69 | -0.872688 | 4.222177  | -2.330041 |
| H70 | 1.298757  | 4.743005  | -0.961578 |
| H71 | 4.006244  | 1.604778  | 2.607770  |
| H72 | 3.664733  | -0.975650 | 3.613697  |



iv) Details of supplementary PDB files

The following PDB files are provided as supporting information:

dcl\_c4\_4-2\_rc\_qmmm.pdb

dcl\_c4\_4-2\_ts\_qmmm.pdb

dcl\_c5\_5-3\_rc\_qmmm.pdb

dcl\_c5\_5-3\_ts\_qmmm.pdb

ib\_c2\_2-3\_rc\_qmmm.pdb

ib\_c2\_2-3\_ts\_qmmm.pdb

ib\_c3\_3-1\_rc\_qmmm.pdb

ib\_c3\_3-1\_ts\_qmmm.pdb

war\_c6\_6-8\_rc\_qmmm.pdb

war\_c6\_6-8\_ts\_qmmm.pdb

war\_c7\_7-9\_rc\_qmmm.pdb

war\_c7\_7-9\_ts\_qmmm.pdb

These structures correspond to the reactant complexes (rc) and transition states (ts) of the pathways with the lowest energy barriers. Structures were optimized with the doublet spin state of Cpd I.

The atoms corresponding to QM atoms in the QM/MM calculations are as follows:

For diclofenac (dcl) calculations, the atoms with the following atom numbers were included in the QM region:

5190-5193, 5778-5807, 5852-5880.

For ibuprofen (ib) calculations, the atoms with the following atom numbers were included in the QM region:

5131-5134, 5702-5731, 5776-5807.

For warfarin (war) calculations, the atoms with the following atom numbers were included in the QM region.

5122-5125, 5683-5712, 5757-5773.
